# Supplementary material for: An induced-fit model for asymmetric organocatalytic reactions: a case study of the activation of olefins via chiral Brønsted acid catalysts
Source: Royal Society of Chemistry journal article supplement (doi:10.1039/d2sc02274e), 2022-01-01
Supplement: d2sc02274e1.pdf [file d2sc02274e1.pdf]

# An induced-fit model for asymmetric organocatalytic reactions: a case study of the activation of olefins *via* chiral Brønsted acid catalysts – Supporting Information

Ingolf Harden <sup>[a]</sup>, Frank Neese <sup>[a]</sup>, Giovanni Bistoni <sup>[a][b]</sup>

<sup>[a]</sup>*Max-Planck-Institut für Kohlenforschung, Kaiser-Wilhelm Platz 1, 45470 Mülheim an der Ruhr (Germany)*

<sup>[b]</sup>*Department of Chemistry, Biology and Biotechnology, University of Perugia Via Elce di Sotto, 8, 06123 Perugia (Italy). E-mail: [giovanni.bistoni@unipg.it](mailto:giovanni.bistoni@unipg.it)*

## Dependency of transition state geometry on computational settings

Here we discuss the influence of different density functionals as well as basis sets on key internal coordinates of the low energy conformers.

**Table S1.** Key bond lengths for the transition state conformers **TS1-1** and **TS1-2'** for different density functionals and basis sets. All bond lengths are in Å.

| <b>TS1-1</b> | PBE-D3/<br>def2-SVP | PBE-D3/<br>def2-TZVP(-f) | B3LYP-D3/<br>def2-TZVP(-f) |
|--------------|---------------------|--------------------------|----------------------------|
| N-H          | 0.1337              | 0.1358                   | 0.1363                     |
| C-H          | 0.1370              | 0.1360                   | 0.1364                     |
| C-O          | 0.2686              | 0.2855                   | 0.2886                     |
| H---O        | 0.1792              | 0.1891                   | 0.1900                     |
| RMSD         | 0.1210              | 0.0000                   | 0.1010                     |

| <b>TS1-2'</b> | PBE-D3/<br>def2-SVP | PBE-D3/<br>def2-TZVP(-f) | B3LYP-D3/<br>def2-TZVP(-f) |
|---------------|---------------------|--------------------------|----------------------------|
| N-H           | 0.1367              | 0.1370                   | 0.1368                     |
| C-H           | 0.1330              | 0.1329                   | 0.1337                     |
| C-O           | 0.2787              | 0.2868                   | 0.2858                     |
| H---O         | 0.1800              | 0.1924                   | 0.2004                     |
| RMSD          | 0.4560              | 0.0000                   | 0.2540                     |

From **Table S1** it can be seen that the basis set size has a larger impact on the geometry than the density functional. While the bond lengths of the TS mode (N-H/C-H bonds) are quite unaffected of both basis set and density functional, the C-O bond length is affected the most. However, the overall changes in geometry are quite small as reflected by the RMSD values. For the larger def2-TZVP(-f) basis set, we seem to be justified in using the computationally less demanding PBE density functional. The constrained geometry optimizations as well as the transition state optimizations were performed *in vacuo* and implicit solvation corrections added to the final Gibbs free energy were obtained from DFT single point energy calculations. In **Table S2** we show the influence of implicit solvation on the transition state geometry of **TS1-1**. For this, the TS geometry was reoptimized using implicit solvation with Cyclohexane as solvent.

**Table S2.** Important bond lengths for the most stable TS conformer **TS1-1** optimized with and without implicit solvation at the PBE-D3/def2-TZVP(-f) level of theory. All bond lengths are in Å.

| <b>TS1-1</b> | Vacuum | CPCM(Cyclo-<br>hexane) |
|--------------|--------|------------------------|
| N-H          | 0.1358 | 0.1367                 |

|       |        |        |
|-------|--------|--------|
| C-H   | 0.1360 | 0.1354 |
| C-O   | 0.2855 | 0.2929 |
| H---O | 0.1891 | 0.1887 |
| RMSD  | 0.0000 | 0.0760 |

The influence of implicit solvation on the TS geometry is fairly small as reflected by the RMSD values. The critical internal coordinates show some moderate changes, but overall the conformation of the system is unchanged. This justifies the use of *in vacuo* optimized geometries for further calculations and analyzes.

### Energy ordering of the most stable transition states at different levels of theories

In **Table S3** we introduce 9 different low-energy conformers leading to the major or minor enantiomeric product, respectively. In the main manuscript we discussed the most stable major **TS1-1** and the two two most stable minor conformers **TS1-1'** and **TS1-2'**. We showed there only the DLPNO-CCSD(T) electronic energies. Here, we discuss the electronic energy ordering at different levels of theories. The results can be found in **Table S3**.

**Table S3.** Relative electronic energies of low-energy transition states at various levels of theory. All energies are obtained for the PBE-D3/def2-TZVP(-f) optimized geometries. All energies are in kcal mol<sup>-1</sup>.

|              | Hartree-Fock/<br>def2-TZVP | DLPNO-<br>CCSD/<br>def2-TZVP | DLPNO-<br>CCSD(T)/<br>def2-TZVP | PBE-D3/<br>def2-TZVP(-<br>f) | B3LYP-D3/<br>def2-TZVP |
|--------------|----------------------------|------------------------------|---------------------------------|------------------------------|------------------------|
| <b>TS1-1</b> | 0.0                        | 0.0                          | 0.0                             | 0.0                          | 0.0                    |
| <b>TS1-2</b> | 10.2                       | 9.7                          | 9.4                             | 7.8                          | 8.0                    |

|               |      |      |      |      |     |
|---------------|------|------|------|------|-----|
| <b>TS1-3</b>  | 1.0  | 0.4  | 0.2  | -0.1 | 0.0 |
| <b>TS1-4</b>  | 5.2  | 3.3  | 2.8  | 1.2  | 1.6 |
|               |      |      |      |      |     |
| <b>TS1-1'</b> | 17.7 | 8.4  | 6.9  | 4.6  | 3.6 |
| <b>TS1-2'</b> | 17.7 | 10.1 | 8.7  | 5.8  | 4.4 |
| <b>TS1-3'</b> | 13.5 | 9.0  | 8.0  | 4.9  | 4.6 |
| <b>TS1-4'</b> | 13.3 | 10.7 | 10.1 | 8.3  | 8.9 |
| <b>TS1-5'</b> | 10.0 | 8.9  | 8.5  | 6.9  | 7.1 |

We first discuss the results for the transition states leading to major enantiomeric product (**TS1-1** – **TS1-4**). All methods predict the guess conformer **TS1-2** (reoptimized at the PBE-D3/def2-TZVP(-f) level of theory) to be highly disfavored in energy with respect to the other conformers, reflecting the potential importance of exploration of the conformational space for large and flexible systems. Correlated wave function methods (DLPNO-CCSD and DLPNO-CCSD(T)) as well as DFT predict smaller relative energy differences for **TS1-2** accordingly with respect to Hartree-Fock. For the conformers **TS1-3** and **TS1-4**, the DLPNO-CCSD(T) and DFT almost yield the same relative energies as well. It is important to note that the low-energy conformers (**TS1-1**, **TS1-3**, **TS1-4**) show quite similar structural features. For the transition states leading to the minor enantiomeric product (**TS1-1'** – **TS1-5'**), we see that Hartree-Fock predicts very high relative energies, indicating the inclusion of correlation stabilizes the minor enantiomers relative to the major transition states. The initial guess conformer **TS1-4'** is significantly higher in energy for Coupled-Cluster and DFT methods. This effect is considerably large for the B3LYP functional, predicting **TS1-4'** to be 5.3 kcal mol<sup>-1</sup> higher in energy than the most stable transition state leading to minor enantiomeric product (**TS1-1'**). In total, DFT and DLPNO-CCSD(T) predict the same energy ordering of the major transition states, while for the minor conformers DFT predicts smaller relative energies. Interestingly, **TS1-1'** is the most stable

minor transition state at both, DFT and DLPNO-CCSD(T) level of theory, while for the other minor conformers the energy ordering might change with respect to the method.

### Thermochemical corrections at the r2SCAN-3c level of theory

In order to test the reliability of the thermochemical corrections calculated at the PBE-D3/def2-TZVP(-f) level of theory, the frequencies and thermochemical corrections were also computed at the r2SCAN-3c level.<sup>1</sup> The r2SCAN-3c calculations were carried out with ORCA 5.0.3.<sup>2</sup>

**Table S4.** Difference of thermochemical corrections between the major (**TS1-1**) and minor (**TS1-1'**, **TS1-2'**, **TS1-3'**, **TS1-4'**, **TS1-5'**) transition states. All energies are in kcal mol<sup>-1</sup>.

|                       | PBE-D3(BJ)/def2-TZVP(-f) | r2SCAN-3c |
|-----------------------|--------------------------|-----------|
| <b>TS1-1' - TS1-1</b> | 1.26                     | 1.32      |
| <b>TS1-2' - TS1-1</b> | -0.03                    | 0.04      |
| <b>TS1-3' - TS1-1</b> | 1.02                     | 0.34      |
| <b>TS1-4' - TS1-1</b> | -0.04                    | -0.38     |
| <b>TS1-5' - TS1-1</b> | 0.30                     | 0.63      |

For all transition state conformers, the difference in thermochemical correction between PBE-D3/def2-TZVP(-f) and r2SCAN-3c is rather small. The largest influence is on **TS1-3' - TS1-1** (-0.68 kcal mol<sup>-1</sup>), while for all other transition states the difference between the methods is below 0.5 kcal mol<sup>-1</sup>.

### Extrapolation of the DLPNO-CCSD(T) energies to the basis set limit

The DLPNO-CCSD(T) energies of **TS1-1**, **TS1-1'** and **TS1-2'** were extrapolated to the basis set limit in order to quantify the error of incomplete basis set to the stereoselectivity. The extrapolation was

performed with ORCA 5.0.3 and the def2-SVP (cardinal number X=2) and def2-TZVP (X=3) basis sets were used. The triples amplitudes were computed iteratively (T1) and implicit solvation was included *via* SMD. The results are shown in **Table S5**.

**Table S5.** Difference of electronic energies at the DLPNO-CCSD(T) level between the major (**TS1-1**) and minor (**TS1-1'**, **TS1-2'**) transition states. All energies are in kcal mol<sup>-1</sup>.

|                               | <b>TS1-1'-TS1-1</b> | <b>TS1-2'- TS1-1</b> |
|-------------------------------|---------------------|----------------------|
| ORCA 4.2.1 def2-TZVP          | 6.880               | 8.743                |
| ORCA 5.0.3 def2-TZVP          | 7.086               | 8.433                |
| ORCA 5.0.3 (2/3)-extrapolated | 6.228               | 8.299                |

As can be seen, the ORCA version has a rather small influence on the stereoselectivity. For both minor transition states, basis set extrapolation reduces the stereoselectivity and therefore brings it closer to the experimental value, while in general the stereoselectivity still is overestimated.

### **Extrapolation of the DLPNO-CCSD energies to the pair natural orbital space limit**

In addition to the extrapolation towards the basis set limit, extrapolation towards the pair natural orbital (PNO) space limit was carried out (Complete PNO Space, CPS).<sup>3</sup> For this, the PNO(6/7)-scheme was used: DLPNO-CCSD calculations with the def2-SVP basis set were carried out once with TCutPNO = 1e-6 and again with TCutPNO=1e-7. The correlation energy was extrapolated *via*:

$$E_{corr,PNO(6,7)} = E_{corr,PNO6} + 1.5 * [E_{corr,PNO7} - E_{corr,PNO6}]. \quad (I)$$

The results are shown in **Table S6**.

**Table S6.** Difference of correlation energies at the DLPNO-CCSD/def2-SVP level between the major (**TS1-1**) and minor (**TS1-1'**, **TS1-2'**) transition states for different values of TCutPNO. All energies are in kcal mol<sup>-1</sup>.

|                        | <b>TS1-1'-TS1-1</b> | <b>TS1-2'- TS1-1</b> |
|------------------------|---------------------|----------------------|
| TcutPNO=1e-6           | -8.016              | -7.120               |
| TCutPNO=1e-7           | -7.997              | -7.263               |
| PNO(6/7)-extrapolation | -7.987              | -7.335               |

The influence of the extrapolation of the TCutPNO value on the difference in correlation energy is only marginally for **TS1-1'** (0.010 kcal mol<sup>-1</sup> with respect to TCutPNO=1e-7) while for **TS1-2'** there is a larger, but in total still small influence (-0.072 kcal mol<sup>-1</sup> with respect to TCutPNO=1e-7). The value of TCutPNO used in the DLPNO-CCSD(T) calculations reported in the main manuscript was 3.33e-7, so that the net stabilization of **TS1-2'** with respect to **TS1-1** due to the CPS-extrapolation is expected to be around 0.1 kcal mol<sup>-1</sup>.

#### **Transition state optimizations at the B3LYP-D3(BJ)/def2-TZVP(-f) level of theory**

The most stable major transition state and the low-energy minor transition states were reoptimized using ORCA 5.0.3 and the B3LYP functional. In **Table S7** the relative energies of the reoptimized transition states at the B3LYP-D3/def2-TZVP(-f) level of theory are compared to the previously obtained transition states at the PBE-D3/def2-TZVP(-f) level of theory.

**Table S7.** Relative electronic energies of low-energy transition states. Geometries and energies are at the PBE-D3/def2-TZVP(-f) or B3LYP-D3/def2-TZVP(-f) level of theory, respectively. All energies are in kcal mol<sup>-1</sup>.

|               | PBE-D3/def2-TZVP(-f) | B3LYP-D3/def2-TZVP(-f) |
|---------------|----------------------|------------------------|
| <b>TS1-1</b>  | 0.0                  | 0.0                    |
| <b>TS1-1'</b> | 4.6                  | 4.3                    |
| <b>TS1-2'</b> | 5.8                  | 5.1                    |
| <b>TS1-3'</b> | 4.9                  | 5.2                    |
| <b>TS1-4'</b> | 8.3                  | 9.0                    |
| <b>TS1-5'</b> | 6.9                  | 7.1                    |

As **Table S7** demonstrates, for both methods quite similar relative energies are obtained. Noticeably, the most stable minor conformers in terms of free energies (**TS1-1'** and **TS1-2'**) show lower relative energies at the B3LYP-D3 level of theory with respect to the PBE-D3 level of theory.

#### Local Energy Decomposition for most stable transition states

In **Table S8** we report the LED results for the transition state conformers listed in **Table S3**. In the main manuscript conformers **TS1-1**, **TS1-1'** and **TS1-2'** were considered (see **Table 1**).

**Table S8.** Decomposition of the reaction barriers for 9 transition state conformers at the DLPNO-CCSD(T) level of theory into geometric preparation, dispersive and non-dispersive interaction contributions. For the definition of the symbols, see the main manuscript. All energies are in kcal mol<sup>-1</sup>.

|                                | <b>TS1-1</b> | <b>TS1-2</b> | <b>TS1-3</b> | <b>TS1-4</b> | <b>TS1-1'</b> | <b>TS1-2'</b> | <b>TS1-3'</b> | <b>TS1-4'</b> | <b>TS1-5'</b> |
|--------------------------------|--------------|--------------|--------------|--------------|---------------|---------------|---------------|---------------|---------------|
| $\Delta G^\ddagger$            | 20.0         | 29.1         | 21.1         | 23.3         | 28.1          | 28.4          | 28.6          | 28.8          | 29.1          |
| $\Delta G_{corr}^\ddagger$     | 20.0         | 19.7         | 20.8         | 20.5         | 21.2          | 19.6          | 20.5          | 18.6          | 20.5          |
| $\Delta E^\ddagger$            | 0.0          | 9.5          | 0.3          | 2.9          | 6.9           | 8.8           | 8.1           | 10.2          | 8.6           |
| $\Delta E_{geo-prep}^\ddagger$ | 50.4         | 57.5         | 51.0         | 49.8         | 56.6          | 63.6          | 61.4          | 58.6          | 64.9          |



|                                |       |       |       |       |       |       |       |       |       |
|--------------------------------|-------|-------|-------|-------|-------|-------|-------|-------|-------|
| Cat.                           | 41.3  | 46.9  | 43.0  | 40.6  | 43.2  | 50.0  | 49.3  | 48.8  | 55.6  |
| Substrate                      | 9.2   | 10.6  | 8.0   | 9.2   | 13.4  | 13.6  | 12.1  | 9.8   | 9.3   |
| $\Delta E_{int}^\ddagger$      | -50.4 | -49.4 | -52.1 | -48.3 | -49.7 | -54.8 | -54.7 | -49.8 | -56.4 |
| $E_{disp}^\ddagger$            | -38.2 | -38.8 | -39.6 | -41.0 | -43.2 | -45.4 | -45.7 | -38.0 | -38.3 |
| $\Delta E_{non-disp}^\ddagger$ | -12.2 | -10.6 | -12.5 | -7.4  | -6.5  | -9.4  | -9.0  | -11.8 | -18.1 |

We start by discussing the conformers leading to the major enantiomeric product. The conformers **TS1-1**, **TS1-3** and **TS1-4** have DLPNO-CCSD(T) energies in the same range and it can be seen that geometric preparation is cancelled by the interaction energy between the catalyst and substrate (see main manuscript for detailed discussion). For the guess conformer **TS1-2** we see that the high relative DLPNO-CCSD(T) energy is mostly caused by geometric preparation. The increased geometric preparation for **TS1-2** is caused by the Ph-(CF<sub>3</sub>)<sub>2</sub> group at the amine group of the catalyst, which does not allow for attractive  $\pi$ - $\pi$  interactions (this is the same effect that causes the increased geometric preparation of **TS1-2'**, see *vide infra* and **Figure 6** for details). For the minor transition state conformers, it can be seen that geometric preparation is the most significant contribution to the difference in electronic energies with respect to **TS1-1**. In fact, the interaction between the catalyst and the substrate is even stronger for most of the minor transition states with respect to **TS1-1**. Interestingly, the most stable minor conformer **TS1-1'**, has the lowest geometric preparation energies of all minor TS conformers, but also the weakest interactions between the two fragments. For **TS1-2'** and **TS1-3'** the geometric preparation but also the attractive interactions between catalyst and substrate are increased with respect to **TS1-1'**. The stabilization is carried out by dispersive attraction between the catalyst and the substrate, while the non-dispersive interactions are decreased with respect to **TS1-1**. In conclusion, the geometric preparation is significantly increased for all minor conformers with respect to the major TS conformers. The strengthened attractive interactions for the minor conformers cannot counteract the geometric preparation leading to large energy differences

between the major and the minor TSs.

### Visualization of discussed transition state conformers

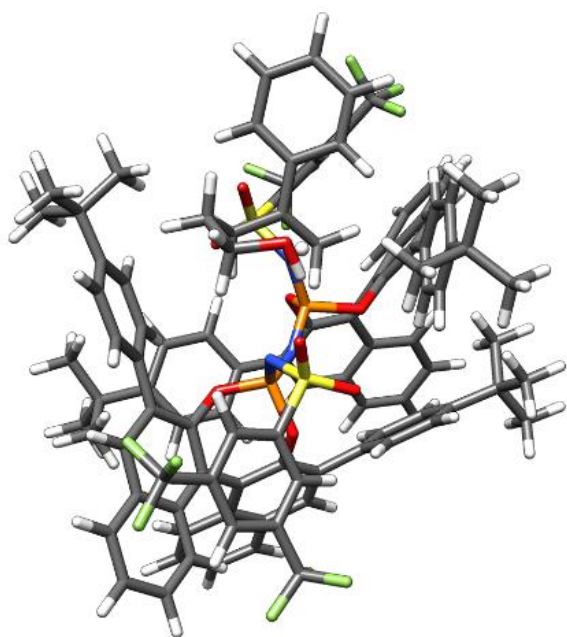

**TS1-1**

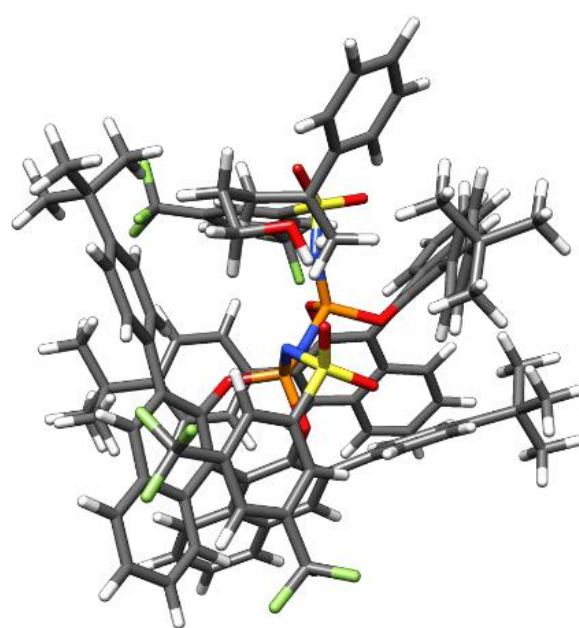

**TS1-2**

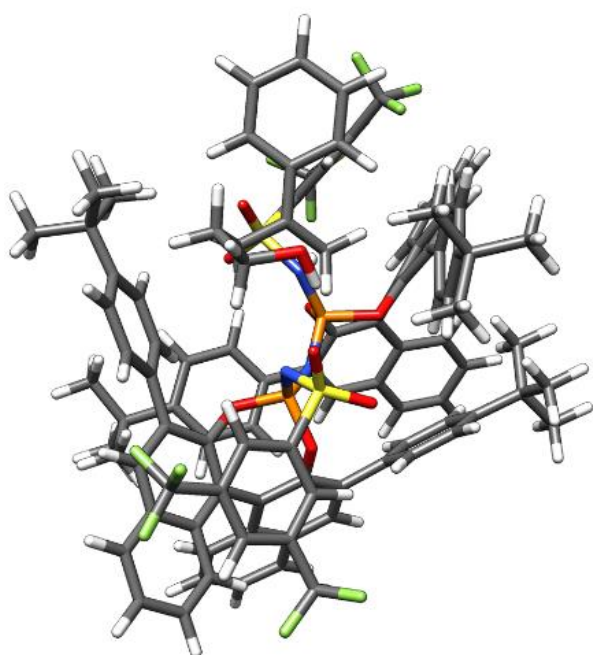

**TS1-3**

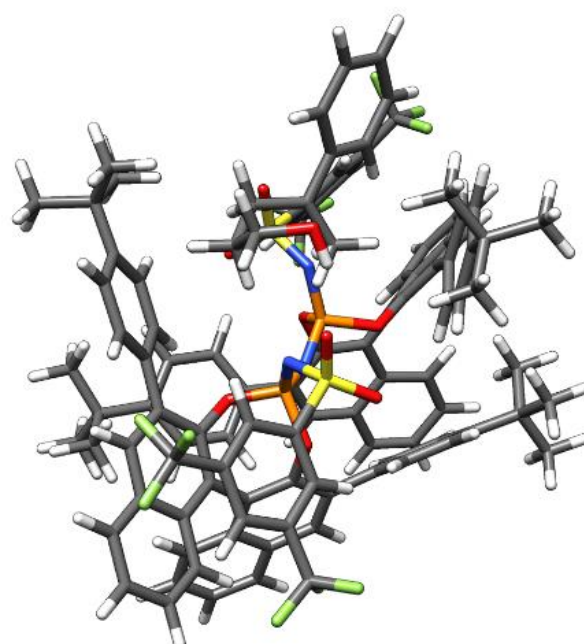

**TS1-4**

**Figure S1.** Four different transition state conformers leading to major enantiomeric product.

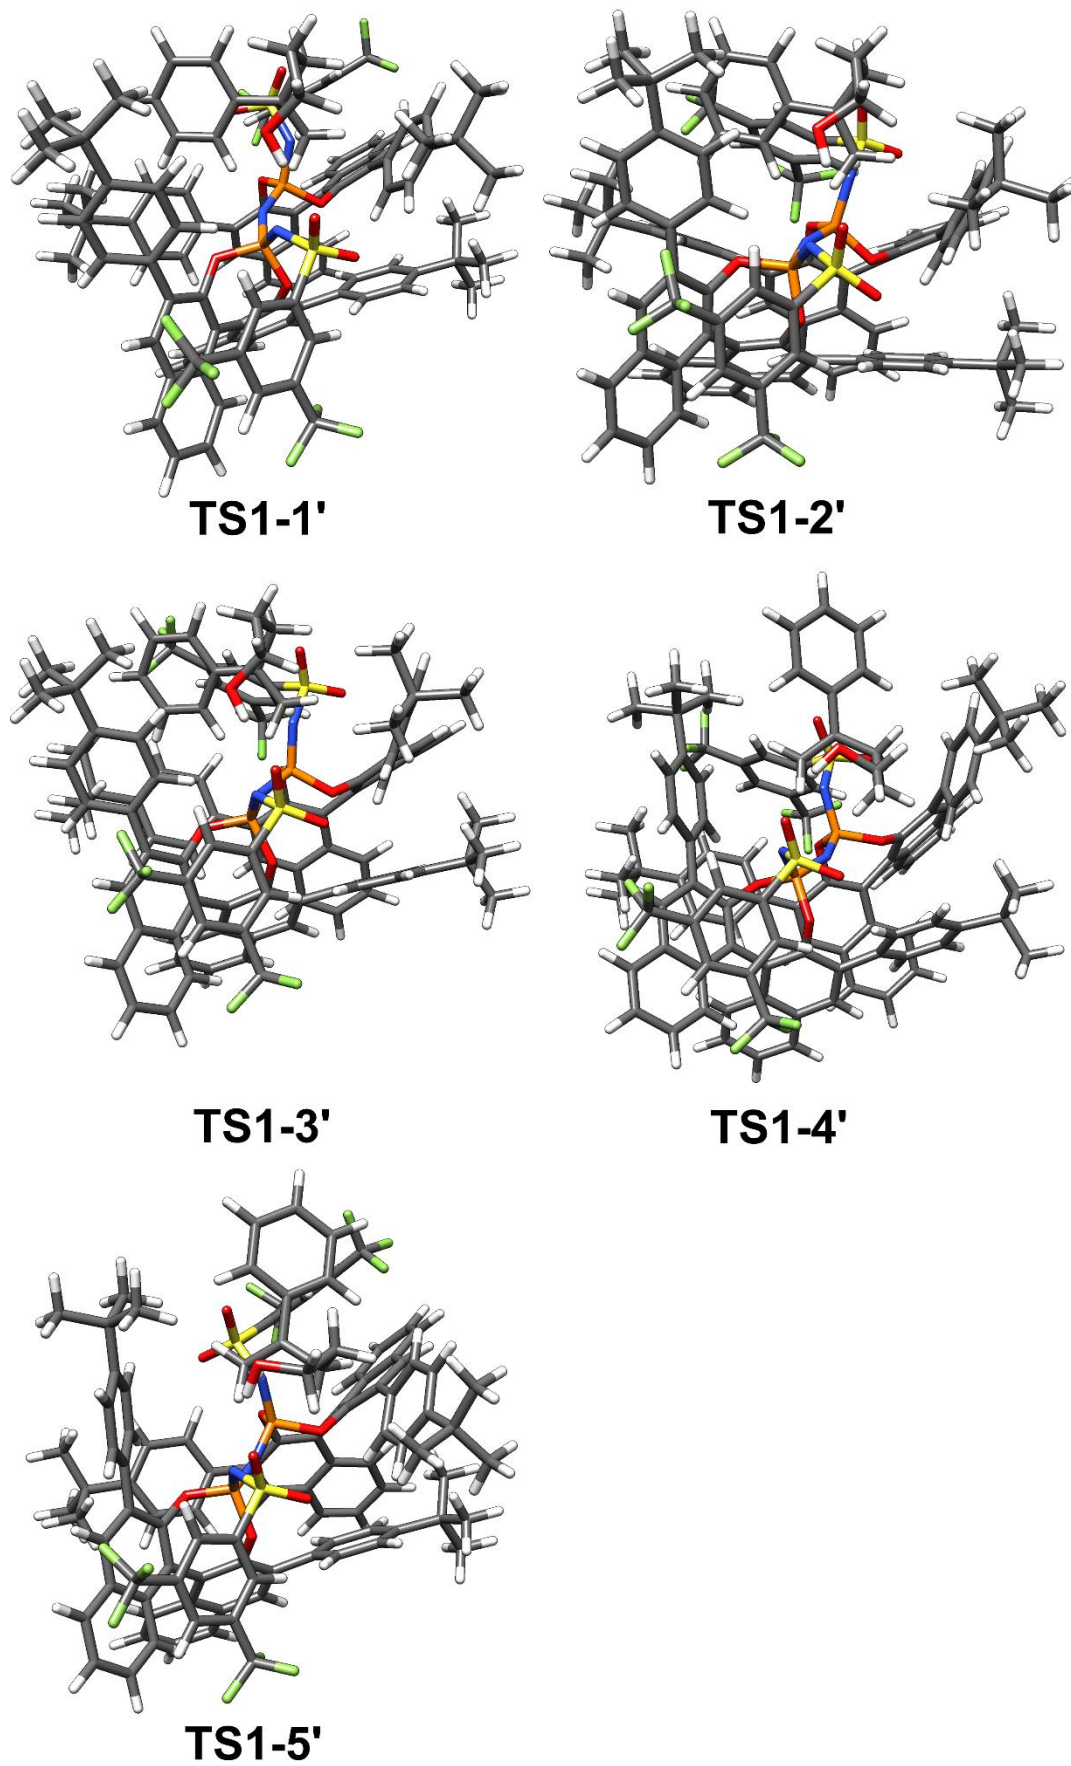

**Figure S2.** Five different transition state conformers leading to the minor enantiomeric product.

### Confinement analysis

We now discuss the results from the confinement analysis of the transition state conformers **TS1-1**, **TS1-1'** and **TS1-2'**. In the main manuscript we have already discussed the general procedure for the deconstruction of the catalyst and how we achieved analysis of the noncovalent interactions (see **Figure 5** and **Figure 6**). In **Table S9** we present the geometric preparation energies for TS conformers **TS1-1** and **TS1-1'** for the different deconstruction points labeled as **3b**, **3b\_1**, **3b\_2**, **3b\_3**, **3b\_4**, **3b\_5**. The corresponding results for the comparison of **TS1-1** and **TS1-2'** can be found in **Table S10**. For measuring the influence of London dispersion, the geometric preparation was calculated with and without Grimme's D3(BJ) dispersion correction.

**Table S9.** Geometric preparation energies for TS conformers **TS1-1** and **TS1-1'** obtained from B3LYP-D3/def2-TZVP calculations. During the calculations only the relaxation of the newly added hydrogen atoms was allowed. For definition of the structures **3b** to **3b\_5** see **Figure 5** of the main manuscript. In order to obtain the geometric preparation of the catalyst backbone, the geometric preparation energies given below were obtained by subtracting the needed energy for the N-H bond elongation (30.2 kcal mol<sup>-1</sup> for **TS1-1**, 29.0 kcal mol<sup>-1</sup> for **TS1-1'** with D3BJ, 30.6 kcal mol<sup>-1</sup> for **TS1-1**, 29.2 kcal mol<sup>-1</sup> for **TS1-1'** without D3BJ) from the total geometric preparation energy. All energies are in kcal mol<sup>-1</sup>.

|             | Geo-prep (with D3BJ) |        |                | Geo-prep (without D3BJ) |        |                |
|-------------|----------------------|--------|----------------|-------------------------|--------|----------------|
|             | TS1-1                | TS1-1' | TS1-1' - TS1-1 | TS1-1                   | TS1-1' | TS1-1' - TS1-1 |
| <b>3b</b>   | 12.5                 | 14.5   | 2.0            | 4.4                     | 9.4    | 5.0            |
| <b>3b_1</b> | 13.3                 | 14.2   | 0.9            | 4.7                     | 11.0   | 6.3            |
| <b>3b_2</b> | 13.6                 | 10.4   | -3.2           | 4.8                     | 9.0    | 4.2            |
| <b>3b_3</b> | 11.7                 | 9.0    | -2.7           | 3.4                     | 7.0    | 3.6            |

|             |     |     |      |     |     |     |
|-------------|-----|-----|------|-----|-----|-----|
| <b>3b_4</b> | 8.7 | 5.9 | -2.8 | 2.8 | 5.7 | 2.9 |
| <b>3b_5</b> | 7.2 | 3.6 | -3.6 | 2.3 | 5.2 | 2.9 |

It can be seen, that London dispersion has a large impact on the total geometric preparation. For **3b**, 65% for **TS1-1** and 35% for **TS1-1'** of geometric preparation stems from London dispersion. This underlines, that geometric preparation must not be exclusively understood as steric hindrance, since weakened or strengthened noncovalent interactions contribute to geometric preparation as well.

Interestingly, without the D3 dispersion correction, the difference in geometric preparation between **TS1-1'** and **TS1-1** remains much more constant for all six different structures and the difference always remains positive. When dispersive interactions are taken into account, the difference in geometric preparation becomes smaller from step to step and starting from **3b\_2** even becomes negative. Starting from **3b\_2**, the difference in geometric preparation remains negative and varies within a window of 0.5 kcal mol<sup>-1</sup>. While substituting groups with hydrogen atoms, the difference in geometric preparation (and therefore the stereoselectivity) becomes smaller, the difference of non-dispersive geometric preparation remains constant. This illustrates, that for the major TS conformer **TS1-1** the removed groups must have had additional dispersive interactions that were not present for the minor TS conformer **TS1-2'**. If the group is removed, the additional dispersive interactions for **TS1-1** cease, leading to decreased difference in geometric preparation.

For all involved groups that are replaced during the deconstruction procedure, we now determine the attractive interactions for **TS1-1** and **TS1-1'** by using NCI plots. In order to analyze the interactions of a particular group, we use the 3D structure of the subsystem before this group is removed. The atomic color code for the **Figures S3 – S12** is: Grey, hydrogen; cyan, carbon; red, oxygen; gold, phosphorus; pink, fluorine; yellow, sulfur.

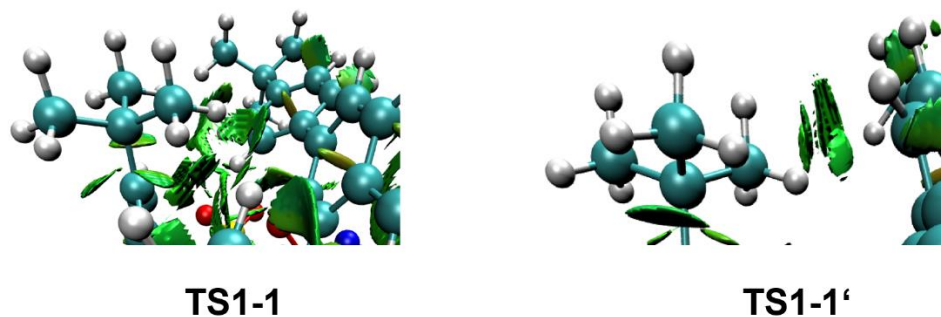

**Figure S3.** Noncovalent interactions of the *t*-Bu group of the BINOL aryl-substituent that does not form the catalyst pocket with the BINOL backbone (**3b\_1**, see **Figure 5**). It can be seen, that for **TS1-1** additional dispersive interactions are present, which is why removal of this group leads do a relative stabilization of **TS1-1'**.

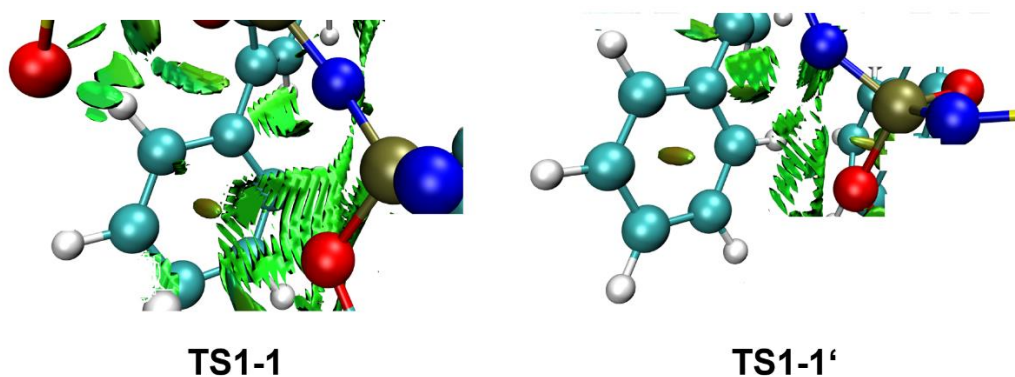

**Figure S4.** Noncovalent interactions of the Ph-ring bound to the BINOL substituent that is not forming the catalyst pocket (**3b\_2**, see **Figure 5**). Due to geometric distortion, **TS1-1** is able to form stronger interactions with the catalyst's backbone, especially with the core catalyst's oxygen atom. Only for **TS1-1** strong attractive interactions of this group are present. Its removal therefore energetically favors **TS1-1'** with respect to **TS1-1**.



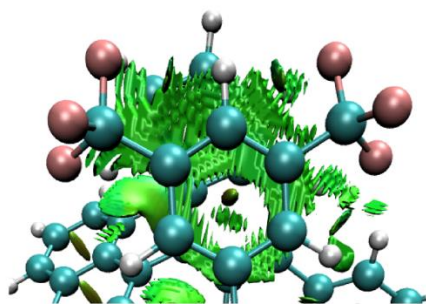

**TS1-1**

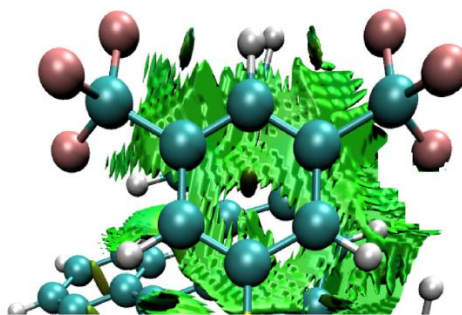

**TS1-1'**

**Figure S5.** Noncovalent interactions between the aminyl-Ph-(CF<sub>3</sub>)<sub>2</sub> group and the residue (**3b\_3**, see **Figure 5**). For both conformers there are equally strong interactions with the ligands Ph-rings. That is why removal of this group does not affect the difference in geometric preparation.

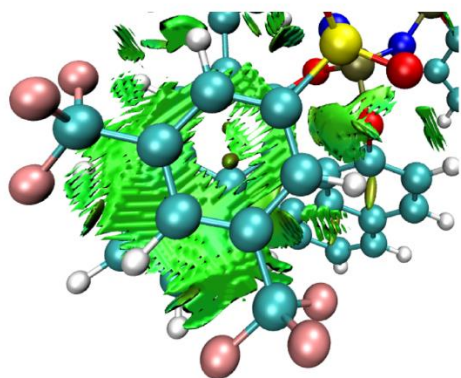

**TS1-1**

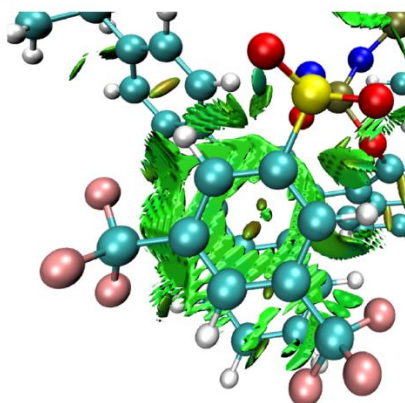

**TS1-1'**

**Figure S6.** Noncovalent interactions between the iminyl-Ph-(CF<sub>3</sub>)<sub>2</sub> group with the residue (**3b\_4**, see **Figure 5**). For both TS conformers  $\pi$ - $\pi$  interactions with the phenyl-rings of the residue are present which is why the stereoselectivity is not significantly affected by the removal of this group.

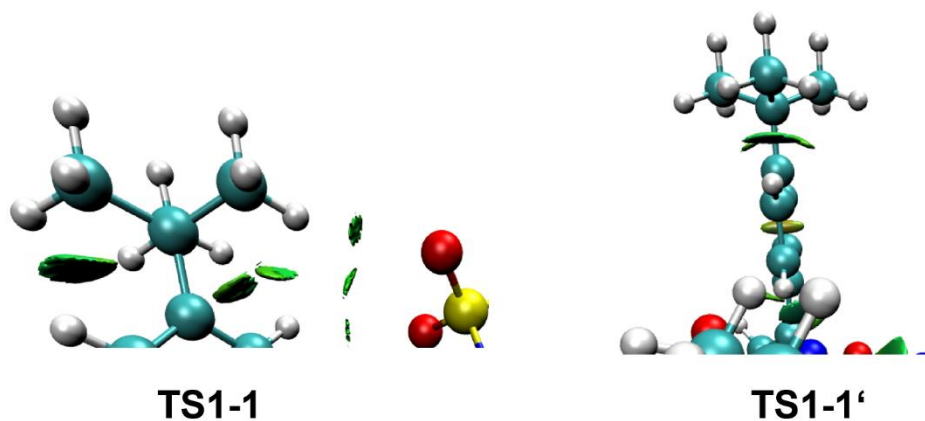

**Figure S7.** Non-covalent interactions between the *t*-Bu group of the pocket forming substituent with the residue (**3b\_5**, see **Figure 5**). For the major TS conformer **TS1-1** additional attractive interactions with the SO<sub>2</sub> group of the core catalyst are present. These stabilizing interactions are missing for the minor TS conformer **TS1-1'**. Removing this group therefore energetically favors **TS1-1'**.

The same analyses were performed for the second most stable minor transition state conformer (**TS1-2'**) which is only 0.3 kcal mol<sup>-1</sup> less stable than **TS1-1'** and therefore should be significantly occupied as well.

**Table S10.** Geometric preparation energies for TS conformers **TS1-1** and **TS1-2'** obtained from B3LYP-D3/def2-TZVP calculations. During the calculations only the relaxation of the newly added hydrogen atoms was allowed. For definition of the structures **3b** to **3b\_5** see **Figure 5** of the main manuscript. In order to obtain the geometric preparation of the catalyst backbone, the geometric preparation energies given below were obtained by subtracting the needed energy for the N-H bond elongation (30.2 kcal mol<sup>-1</sup> for **TS1-1**, 31.3 kcal mol<sup>-1</sup> for **TS1-2'** with D3BJ, 30.6 kcal mol<sup>-1</sup> for **TS1-1**, 31.8 kcal mol<sup>-1</sup> for **TS1-2'** without D3BJ) from the total geometric preparation energy. All energies are in kcal mol<sup>-1</sup>.



|             | Geo-prep (with D3BJ) |        |                | Geo-prep (without D3BJ) |        |                |
|-------------|----------------------|--------|----------------|-------------------------|--------|----------------|
|             | TS1-1                | TS1-2' | TS1-2' - TS1-1 | TS1-1                   | TS1-2' | TS1-2' - TS1-1 |
| <b>3b</b>   | 12.5                 | 18.5   | 6.0            | 4.4                     | 10.8   | 6.4            |
| <b>3b_1</b> | 13.3                 | 17.9   | 4.6            | 4.7                     | 13.2   | 8.5            |
| <b>3b_2</b> | 13.6                 | 16.3   | 2.7            | 4.8                     | 10.6   | 5.8            |
| <b>3b_3</b> | 11.7                 | 9.1    | -2.6           | 3.4                     | 9.0    | 5.6            |
| <b>3b_4</b> | 8.7                  | 5.9    | -2.8           | 2.8                     | 7.5    | 4.7            |
| <b>3b_5</b> | 7.2                  | 3.1    | -4.1           | 2.3                     | 6.2    | 3.9            |

As for **TS1-1'**, London dispersion has a large impact on the total geometric preparation. For **3b**, 65% for **TS1-1** and 42% for **TS1-2'** of geometric preparation stems from London dispersion.

Again, without the D3 dispersion correction, the difference in geometric preparation between **TS1-2'** and **TS1-1** almost remains constant for all six different structures. When dispersive interactions are taken into account, the difference in geometric preparation becomes smaller from step to step and starting from **3b\_3** even becomes negative. This already hints to the great importance of dispersive interactions for the geometric preparation and for stereoselectivity as well.

For all involved groups that are replaced during the deconstruction procedure, we now determine the attractive interactions for **TS1-1** and **TS1-2'** by using NCI plots. In order to analyze the interactions of a particular group, we use the 3D structure of the subsystem before this group is removed.

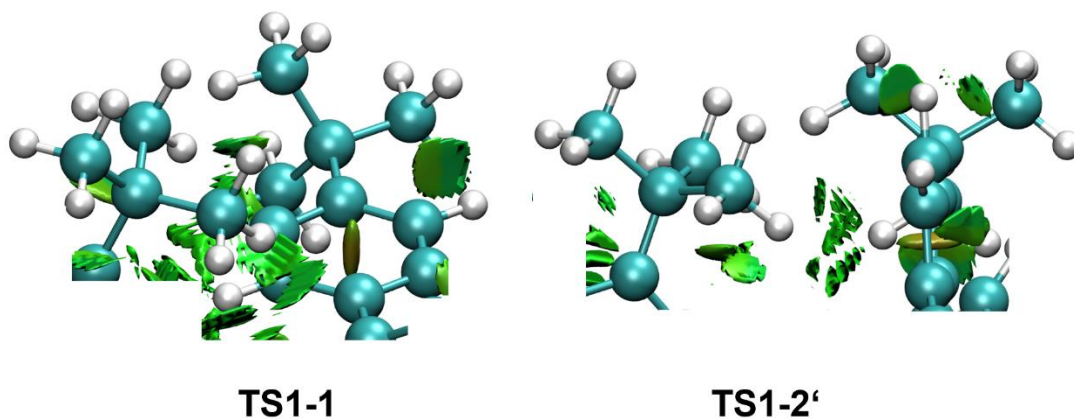

**Figure S8.** Noncovalent interactions of the *t*-Bu group of the BINOL aryl-substituent that does not form the catalyst pocket with the BINOL backbone (**3b\_1**, see **Figure 5**). It can be seen, that for **TS1-1** additional dispersive interactions are present, which is why removal of this group leads do a relative stabilization of **TS1-2'**.

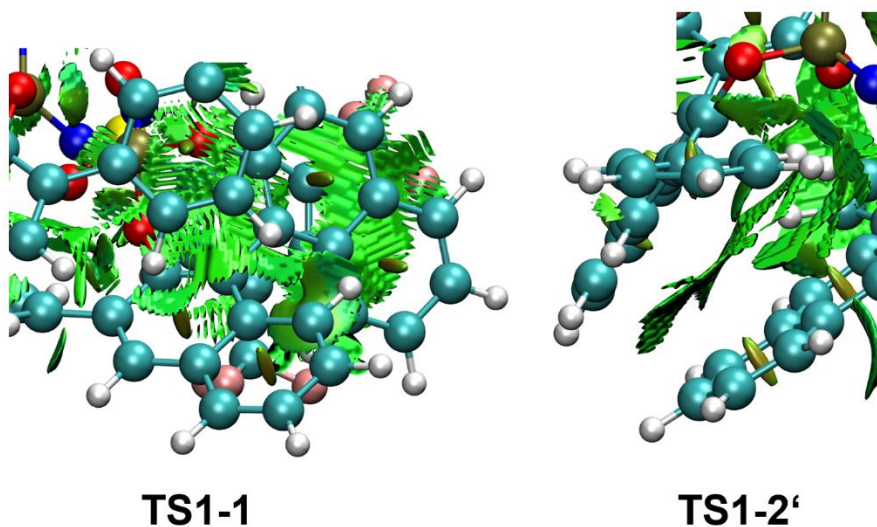

**Figure S9.** Noncovalent Interactions of the Ph-ring bound to the BINOL substituent that is not forming the catalyst pocket (**3b\_2**, see **Figure 5**). Due to geometric distortion, **TS1-1** forms stronger interactions with the catalyst's backbone. For **TS1-2'** the distance to the next aryl-ligand is too large to allow for dispersive interactions. For **TS1-1** more attractive interactions of this group are present. Its removal therefore energetically favors **TS1-2'**.

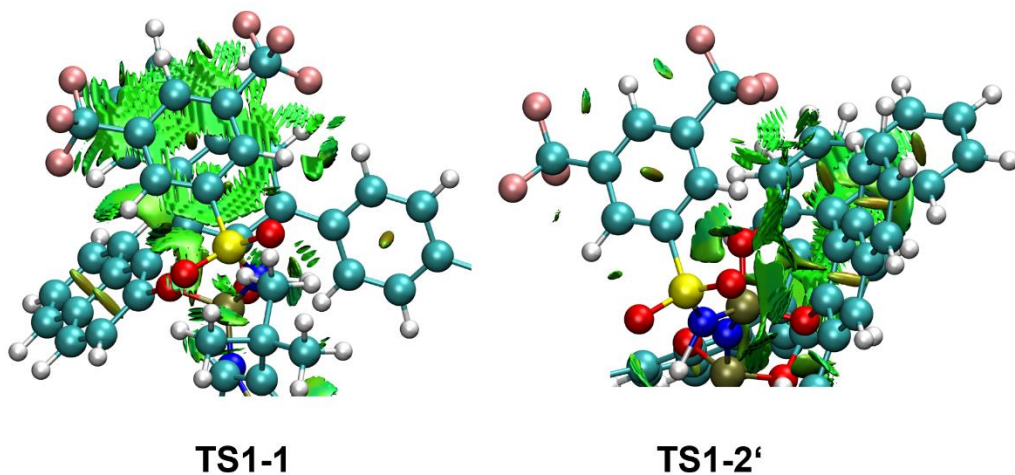

**Figure S10.** Noncovalent interactions between the aminyl-Ph-(CF<sub>3</sub>)<sub>2</sub> group and the residue (**3b\_3**, see **Figure 5**). The aminyl-Ph-(CF<sub>3</sub>)<sub>2</sub> group of **TS1-1** has strong attractive interactions with the phenyl-rings of the BINOL substituents. For **TS1-2'** the corresponding aminyl-Ph-(CF<sub>3</sub>)<sub>2</sub> group has rotated and therefore does not allow for such interaction. Because of the strong interactions only present for **TS1-1**, the removal of this group has large influence on the stereoselectivity.

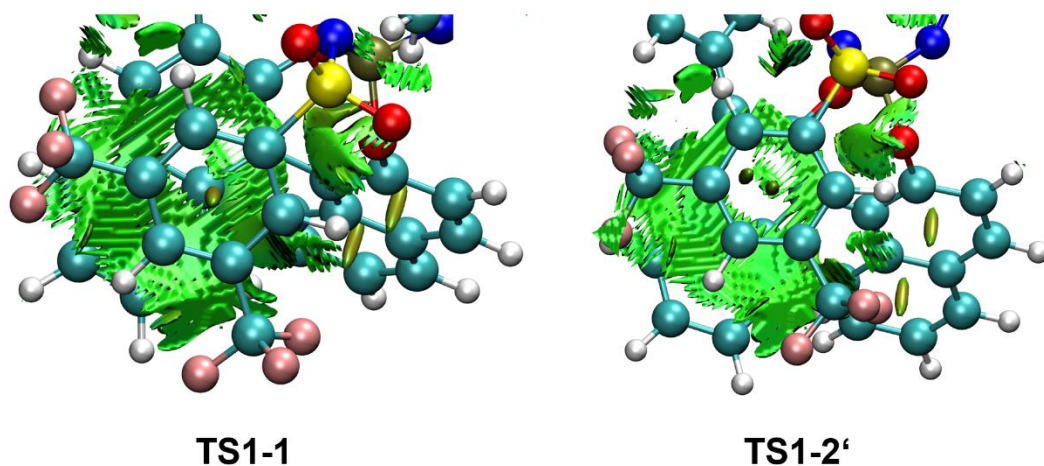

**Figure S11.** Noncovalent interactions between the iminyl-Ph-(CF<sub>3</sub>)<sub>2</sub>-group with the residue (**3b\_4**, see **Figure 5**). For both TS conformers  $\pi$ - $\pi$  interactions with the phenyl-rings of the residue are present, which is why the stereoselectivity is not affected by the removal of this group.

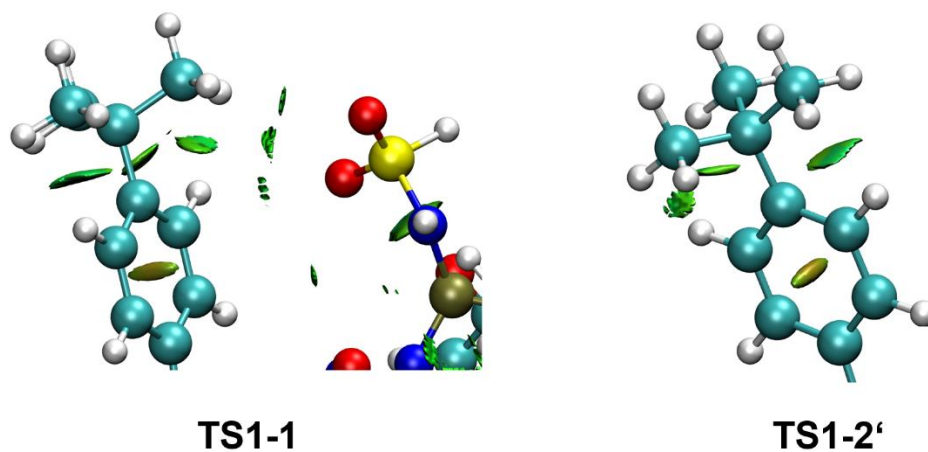

**Figure S12.** Non-covalent interactions between the *t*-Bu group of the pocket forming substituent with the residue (**3b\_5**, see **Figure 5**). For the major TS conformer **TS1-1** additional attractive interactions with the SO<sub>2</sub> group of the core catalyst are present. These stabilizing interactions are missing for the minor TS conformer **TS1-2'**. Removing this group therefore energetically favors **TS1-2'**.

## Literature

- (1) Grimme, S.; Hansen, A.; Ehlert, S.; Mewes, J.-M. r2SCAN-3c: A “Swiss army knife” composite electronic-structure method. *The Journal of Chemical Physics* **2021**, *154* (6), 064103. DOI: 10.1063/5.0040021.
- (2) Neese, F. Software update: The ORCA program system—Version 5.0. *WIREs Computational Molecular Science* *n/a* (n/a), e1606. DOI: <https://doi.org/10.1002/wcms.1606>.
- (3) Altun, A.; Neese, F.; Bistoni, G. Extrapolation to the Limit of a Complete Pair Natural Orbital Space in Local Coupled-Cluster Calculations. *Journal of Chemical Theory and Computation* **2020**, *16* (10), 6142-6149. DOI: 10.1021/acs.jctc.0c00344.

## Cartesian coordinates of important structures

26

1

|   |                   |                   |                   |
|---|-------------------|-------------------|-------------------|
| C | -1.01908820361449 | 0.79792049035890  | -2.03193581732639 |
| C | -0.63634276459056 | -0.09420080450966 | -1.09654749265114 |
| C | 0.72241556678069  | -0.04520218819730 | -0.50069642846183 |
| C | 1.35227902864235  | 1.18549961891112  | -0.24555952072227 |
| C | 2.63633841505473  | 1.23845832462114  | 0.29172631758097  |
| C | 3.32143821852200  | 0.05896852162420  | 0.59329976079004  |
| C | 2.70524038049900  | -1.17131024511474 | 0.35876819899496  |
| C | 1.41729007005784  | -1.22226721083652 | -0.17373781677047 |
| H | 0.95534506978284  | -2.19331461826676 | -0.35676478067466 |
| H | 3.22927428484150  | -2.09927256157846 | 0.59378130390326  |
| H | 4.32519443843007  | 0.09914092717349  | 1.01893364496001  |
| H | 3.09940575581407  | 2.20639432315137  | 0.49040206214662  |
| H | 0.81098823677665  | 2.11171102236131  | -0.44522421400723 |
| C | -1.58138806920529 | -1.17447097828202 | -0.61874071722792 |
| C | -1.98628240963467 | -1.05608349859203 | 0.86211602396382  |
| C | -2.84316024197817 | 0.17268906098547  | 1.16758993677025  |
| H | -3.71724907054804 | 0.19100673869853  | 0.48466203173878  |
| H | -3.23370765254813 | 0.10800096616981  | 2.19395520289056  |
| O | -2.12724698727059 | 1.40857161933745  | 1.10733852932261  |
| H | -1.76072939309116 | 1.47579432412964  | 0.20454206809482  |
| H | -2.56219540119296 | -1.95537093595829 | 1.13849162397643  |
| H | -1.08943387258415 | -1.03607836704355 | 1.50107981180797  |
| H | -1.11203483596668 | -2.15915743265567 | -0.77861745111873 |
| H | -2.48617976197796 | -1.15884306003720 | -1.24677071316642 |
| H | -0.33619964206188 | 1.55792995170801  | -2.41377998397549 |
| H | -2.02189819863705 | 0.76608638034176  | -2.46154500673856 |

26

2

|   |                   |                   |                   |
|---|-------------------|-------------------|-------------------|
| O | -2.84895405365497 | -0.03423062449586 | -0.10568543421516 |
| C | -4.01210775499212 | 0.79588070692340  | -0.05840820208392 |
| C | -3.53986037771518 | 2.26499775164735  | -0.08445196696827 |
| C | -2.00351627176745 | 2.18348274618222  | 0.04238788576502  |
| C | -1.68459447120063 | 0.69956632337185  | 0.36153386977163  |
| C | -0.51641769415571 | 0.18558062767732  | -0.47086615546020 |
| C | -1.50055656084385 | 0.46713072685882  | 1.86764482064725  |
| C | -2.43255247220355 | 0.98615372791866  | 2.78318937771398  |
| C | -2.30967113175948 | 0.75810217664513  | 4.15294922945978  |
| C | -1.24057494308566 | 0.00831542485200  | 4.64877535036976  |
| C | -0.30078486541615 | -0.50488547586213 | 3.75622560399522  |
| C | -0.43286405722948 | -0.27840527809550 | 2.38358047116309  |
| H | -4.60312960196440 | 0.57440755877063  | 0.84888922657190  |
| H | -4.62730980009245 | 0.53002445015080  | -0.93121669801515 |
| H | -3.99273222257856 | 2.84121330835427  | 0.73391302295850  |
| H | -3.82751258192139 | 2.75880700523638  | -1.02179878647783 |
| H | -1.61226414649203 | 2.85456434077096  | 0.81707510418719  |
| H | -1.52119495490920 | 2.46155450720657  | -0.90446183051762 |
| H | -0.74464478672589 | 0.34997602899048  | -1.53200042468694 |
| H | -0.36080943347378 | -0.89076907098951 | -0.32145140887308 |
| H | 0.41316948803505  | 0.71722326172107  | -0.22360868840393 |
| H | -3.27057238597264 | 1.58776059527091  | 2.43140809331532  |
| H | -3.05297154186007 | 1.17193857145994  | 4.83683766030294  |
| H | -1.13970839310485 | -0.16858270073609 | 5.72066295745823  |
| H | 0.54441994145970  | -1.08816942595486 | 4.12618479758095  |
| H | 0.31851507362480  | -0.69430726387484 | 1.71300212444131  |

202  
3b

|   |                   |                   |                   |
|---|-------------------|-------------------|-------------------|
| H | 6.67640427518166  | -0.86627629891181 | 4.46175548580739  |
| C | 5.63455179041630  | -1.08231214089813 | 4.18427400712352  |
| C | 5.60901795912090  | -2.15847070219067 | 3.08998358523203  |
| C | 4.18345668990326  | -2.51115995519065 | 2.65123999430598  |
| C | 3.04296192364119  | -1.95603304373837 | 3.24535026804180  |
| C | 1.75719391830104  | -2.34314384126744 | 2.86734020083900  |
| C | 1.55677618690678  | -3.30942798690960 | 1.87145410303887  |
| C | 2.69792531850300  | -3.84504269189816 | 1.24852615912467  |
| C | 3.97581292297224  | -3.45696167081602 | 1.63289467904927  |
| H | 4.82808136772308  | -3.90209693233284 | 1.11756953923994  |
| H | 2.57998230216739  | -4.56028854171420 | 0.43310196083483  |
| C | 0.21411365181658  | -3.80058303747282 | 1.49078233828594  |
| C | 0.00385697357298  | -5.13986140838379 | 1.19957606108571  |
| C | -1.25097749168725 | -5.63644951994662 | 0.77498305630122  |
| C | -1.41871780848215 | -7.00242974857612 | 0.42254798397431  |
| C | -2.62642923521358 | -7.47150602887634 | -0.04642408666677 |
| C | -3.72117149893765 | -6.58703693557738 | -0.18108491969173 |
| C | -3.59716704355485 | -5.25799791340160 | 0.16883039031667  |
| C | -2.37045858527947 | -4.74485397651327 | 0.66550251860405  |
| C | -2.18319742827530 | -3.36683101291706 | 1.00670072649713  |
| C | -0.91758457940954 | -2.94597411782502 | 1.37971166024476  |
| O | -0.75090123808282 | -1.58187934729226 | 1.64662556534826  |
| P | -0.68401622720473 | -0.59113275144918 | 0.36668181575390  |
| N | -0.93474259499548 | 0.90380664743076  | 0.82917467898743  |
| S | -0.65496148948796 | 1.46620023463561  | 2.31422094989079  |
| O | -0.73287475528452 | 2.92171449397702  | 2.24803747914282  |
| O | 0.51071674065739  | 0.85799807851551  | 2.95700778642758  |
| C | -2.09426540946579 | 0.90075973954233  | 3.24050483227379  |
| C | -1.97207177870529 | -0.19688985635132 | 4.08716152662494  |
| C | -3.10502754448502 | -0.68643761643296 | 4.74160856769154  |
| C | -4.34557619234706 | -0.07403092734366 | 4.56953090621642  |
| C | -4.44295410595381 | 1.04568000091162  | 3.73975778113035  |
| C | -3.32272724058893 | 1.53683608787993  | 3.06690560426481  |
| H | -3.39684007829491 | 2.40640165733873  | 2.41580595266798  |
| C | -5.75376897597242 | 1.77554866933189  | 3.59659344044783  |
| F | -6.02273146084862 | 2.09390446516907  | 2.29623696734240  |
| F | -6.80789457009859 | 1.05245124751141  | 4.05672965784560  |
| F | -5.74567719025063 | 2.95142232068021  | 4.28669922040360  |
| H | -5.22807414672847 | -0.46736387636704 | 5.06947599937911  |
| C | -2.94618607025976 | -1.87880135524876 | 5.64913051826240  |
| F | -2.32245186276945 | -2.91385025006768 | 5.01484790132545  |
| F | -4.13308695958034 | -2.34638081365098 | 6.11354945088479  |
| F | -2.18073040513321 | -1.57693531140258 | 6.73760930741473  |
| H | -0.99795943187097 | -0.66431747771075 | 4.22044429688961  |
| N | 0.59804201384849  | -0.97145997433411 | -0.49359906618997 |
| P | 1.81167837512537  | -0.24307783960472 | -1.10150161884499 |
| N | 1.75216223448835  | 1.41528884729686  | -1.30399878739679 |
| S | 0.95367343289511  | 2.16173766313114  | -2.59887578916961 |
| O | -0.13264583492557 | 1.26476538965888  | -2.93608426897107 |
| O | 1.94283029405554  | 2.56892403862413  | -3.57842792729971 |
| C | 0.33269476504904  | 3.65563684794681  | -1.83732181776459 |
| C | -0.82238877118294 | 3.63976898622264  | -1.04691160289841 |
| C | -1.28555997482745 | 4.85707606686595  | -0.54989198738826 |
| C | -0.61206996376892 | 6.05265667051491  | -0.82377833076528 |
| C | 0.53838811690024  | 6.03751056681775  | -1.60443499708941 |
| C | 1.01761569140536  | 4.83291947478991  | -2.12356828042918 |

|   |                   |                   |                   |
|---|-------------------|-------------------|-------------------|
| H | 1.90293498020178  | 4.80440460838376  | -2.75767243125589 |
| C | 1.30150253445267  | 7.30410026787660  | -1.89816536067685 |
| F | 0.69569041153742  | 8.40450524578868  | -1.39013387382655 |
| F | 2.56096428676929  | 7.25491411365997  | -1.36740440651165 |
| F | 1.45235362532947  | 7.49899268866471  | -3.23602403527956 |
| H | -0.98633397837469 | 6.99272483266579  | -0.42033898497540 |
| C | -2.54070003699297 | 4.95646092173202  | 0.28420745786210  |
| F | -2.30560968817251 | 5.58442968405919  | 1.46547446188241  |
| F | -3.09592210090786 | 3.75817608952038  | 0.55030117061943  |
| F | -3.48714678128959 | 5.70546584126865  | -0.36816682426543 |
| H | -1.33501053346996 | 2.70473362612141  | -0.81918209889340 |
| H | 2.56957858634138  | 1.93409006546517  | -0.94893648520472 |
| O | 2.20455135004985  | -0.86058146226977 | -2.53797824499448 |
| C | 2.71400596387383  | -2.18008852909264 | -2.46266262822210 |
| C | 4.04333716217308  | -2.32257454459632 | -2.08784312392027 |
| C | 4.57380526212481  | -3.64340271671687 | -1.93364911399349 |
| C | 5.88490154337848  | -3.89941038478616 | -1.45339536757908 |
| C | 6.34145724735761  | -5.19102995758131 | -1.29078757600474 |
| C | 5.51136243737688  | -6.29221814820078 | -1.60360993381116 |
| C | 4.22883818688771  | -6.07786154569643 | -2.05821401848436 |
| C | 3.72150013980500  | -4.76054348168029 | -2.22046669236850 |
| C | 2.38507845647726  | -4.53626986000924 | -2.62187159651239 |
| C | 1.83753089159234  | -3.26589388068076 | -2.73056387935719 |
| C | 0.40790743479966  | -3.10507891550904 | -3.07292921502645 |
| C | -0.06046921006600 | -2.14470547696191 | -3.97947372581773 |
| C | -1.40744917819939 | -2.10687443085466 | -4.34480811850445 |
| C | -2.34065004014646 | -3.01112558200102 | -3.81932348618704 |
| C | -1.86977497819201 | -3.93845731942146 | -2.87473529060346 |
| C | -0.53112881598970 | -3.98603239741936 | -2.50874506343376 |
| H | -0.20879181981518 | -4.70338365366567 | -1.75258086876848 |
| H | -2.55932456602207 | -4.64239652855740 | -2.40653228629165 |
| C | -3.80758816720576 | -3.05385731328542 | -4.26135146653284 |
| C | -4.15823048579024 | -1.92575419283805 | -5.24162682974293 |
| H | -5.21733412831513 | -2.00555740448923 | -5.52636075506677 |
| H | -3.56168496201346 | -1.98651073577037 | -6.16364764592870 |
| H | -4.00952254230887 | -0.93356150266808 | -4.79239165603894 |
| C | -4.73779169063514 | -2.94231780955279 | -3.03705859569002 |
| H | -5.78778847364134 | -3.02669635044198 | -3.35542806978037 |
| H | -4.61418698112227 | -1.97658608449050 | -2.53023951303770 |
| H | -4.54296879686441 | -3.73720795909298 | -2.30454280027036 |
| C | -4.05947332148719 | -4.40670066867089 | -4.96149551716720 |
| H | -5.10644788352080 | -4.47159976153251 | -5.29492623095808 |
| H | -3.86389143574593 | -5.25014570495806 | -4.28455123650765 |
| H | -3.40890711697649 | -4.51992666077560 | -5.84086183977227 |
| H | -1.72381633842993 | -1.35446814399334 | -5.06681741065556 |
| H | 0.62996207187300  | -1.42760956643494 | -4.42204836774157 |
| H | 1.75479608092521  | -5.39902602718510 | -2.84528143309303 |
| H | 3.57261397963954  | -6.91954434268335 | -2.28937944306173 |
| H | 5.88614281062551  | -7.30861960894446 | -1.47566300386209 |
| H | 7.35029943723662  | -5.36349448528614 | -0.91294121349206 |
| H | 6.53258744521084  | -3.06034571122057 | -1.20375076541385 |
| C | 4.84322035054308  | -1.10947582990526 | -1.78278733753935 |
| C | 4.36894187949865  | -0.19738542646949 | -0.85308712169654 |
| C | 5.02716176244406  | 1.01551758184944  | -0.51570242608061 |
| C | 6.24495760368034  | 1.25894692472227  | -1.12899214421168 |
| C | 6.78779612610889  | 0.38108203200966  | -2.09557724333198 |
| C | 8.01576133000180  | 0.67437351833234  | -2.74621772309432 |
| C | 8.49932166723468  | -0.14133018444075 | -3.74511991913928 |

|   |                   |                   |                   |
|---|-------------------|-------------------|-------------------|
| C | 7.76274843282562  | -1.28032896806432 | -4.14385639680751 |
| C | 6.57635903195344  | -1.60422976620455 | -3.51934423673164 |
| C | 6.06734876622926  | -0.80502633607621 | -2.46268401970986 |
| H | 6.01408375252009  | -2.48044209719690 | -3.83954081448026 |
| H | 8.13314368976506  | -1.90620052610518 | -4.95698598873236 |
| H | 9.44039410297410  | 0.09815246491567  | -4.24203636728060 |
| H | 8.56146227494463  | 1.57172279165278  | -2.44752147135489 |
| H | 6.79533690220271  | 2.16643511772973  | -0.87297713755335 |
| C | 4.39842866907937  | 2.01494813668385  | 0.37809521932424  |
| C | 3.78359317395107  | 1.66780000796433  | 1.59158098031870  |
| C | 3.18859289988086  | 2.63857409185003  | 2.39446156975953  |
| C | 3.16945017127193  | 3.99032171916047  | 2.02519485743022  |
| C | 3.76858597845641  | 4.33098319533319  | 0.80008912050126  |
| C | 4.37342540707408  | 3.37069541773467  | -0.00671945550906 |
| H | 4.81603710753064  | 3.66401652427099  | -0.96134357315702 |
| H | 3.75808590897334  | 5.36763175662052  | 0.45896613918179  |
| C | 2.52661443964572  | 5.07372014928069  | 2.89489454855772  |
| C | 1.92415695244125  | 4.49951332643431  | 4.18462420119580  |
| H | 1.12889182188865  | 3.77331861679781  | 3.96824717373924  |
| H | 1.48180742696221  | 5.31671103848284  | 4.77237457075529  |
| H | 2.68827374330687  | 4.01531507869457  | 4.81062870911758  |
| C | 3.60037296098863  | 6.11633668166550  | 3.26809042196237  |
| H | 4.03366905793791  | 6.59202023467076  | 2.37694728007224  |
| H | 4.41849098901131  | 5.65147238522396  | 3.83745767185879  |
| H | 3.15472153398049  | 6.90725933035893  | 3.88970602187325  |
| C | 1.39861444075676  | 5.75802378925350  | 2.09723423716322  |
| H | 1.78179745068340  | 6.22556966856681  | 1.17979184855634  |
| H | 0.93234696618677  | 6.54614151333373  | 2.70752762860490  |
| H | 0.62355045776693  | 5.02840770761987  | 1.82892961830247  |
| H | 2.70195059009564  | 2.31523083491111  | 3.31195568714249  |
| H | 3.75503639584456  | 0.62660555277922  | 1.91117476249697  |
| O | 3.13486668117572  | -0.46196125148023 | -0.21738318479445 |
| O | -1.88953797114062 | -1.10326596481892 | -0.58293507061384 |
| C | -3.13794723015287 | -1.28838867933806 | 0.02786862925653  |
| C | -3.28483967547049 | -2.37624989978901 | 0.87928633479153  |
| C | -4.50320151533268 | -2.50726961046730 | 1.61734237194128  |
| C | -4.68084049169302 | -3.47850590999069 | 2.63581002602844  |
| C | -5.85993514031734 | -3.54590333845996 | 3.34896989732233  |
| C | -6.92161592103465 | -2.65480130383152 | 3.06965065765003  |
| C | -6.77715625147170 | -1.69605163460638 | 2.09031451322781  |
| C | -5.56816687517617 | -1.58425855614810 | 1.35374980503851  |
| C | -5.39176532839051 | -0.57662207553517 | 0.37926765714235  |
| C | -4.18919607111694 | -0.37806254194474 | -0.28381932964433 |
| C | -4.05546750976004 | 0.70639791651442  | -1.28256898780961 |
| C | -3.26420365397993 | 0.57659455559539  | -2.43856237028565 |
| C | -3.21494581282111 | 1.59118593494832  | -3.38690123835519 |
| C | -3.93565005839917 | 2.78637416247794  | -3.23811116431109 |
| C | -4.72109743916608 | 2.91275042057300  | -2.08503930573006 |
| C | -4.77977338481125 | 1.89883185189659  | -1.13001121954193 |
| H | -5.37323249134423 | 2.05755987671244  | -0.22901013126934 |
| H | -5.28611418163395 | 3.82624747891735  | -1.90384415722465 |
| C | -3.83479103486783 | 3.87791664260864  | -4.30791559240816 |
| C | -2.36741584621127 | 4.33714584520617  | -4.43633784981156 |
| H | -2.02132697694053 | 4.79851077840541  | -3.50070990080363 |
| H | -2.27213912685487 | 5.08281791485608  | -5.24002671742335 |
| H | -1.69662564170335 | 3.49859776830342  | -4.66889268145096 |
| C | -4.30711185264207 | 3.30215786356621  | -5.65894979234969 |
| H | -5.35117972464866 | 2.96320138216508  | -5.59470523797071 |



|   |                   |                   |                   |
|---|-------------------|-------------------|-------------------|
| H | -3.69271860471160 | 2.44640482541051  | -5.97094374739030 |
| H | -4.24092917876395 | 4.07100807031215  | -6.44362498383180 |
| C | -4.69626847851429 | 5.10301890882481  | -3.97289262802197 |
| H | -4.59045166288231 | 5.85511295368061  | -4.76808367948156 |
| H | -4.38849210716065 | 5.57071821907416  | -3.02653649187918 |
| H | -5.76228570486365 | 4.84271772324614  | -3.89927330613959 |
| H | -2.57613136652912 | 1.44568745866779  | -4.25898697178424 |
| H | -2.67630882364205 | -0.32323185768055 | -2.60376049089760 |
| H | -6.23702942105628 | 0.07337610285921  | 0.14974016185981  |
| H | -7.58139665234032 | -0.98773141850202 | 1.88250872055572  |
| H | -7.84941667668197 | -2.71999293657770 | 3.63982936213797  |
| H | -5.96823587371964 | -4.28471008430594 | 4.14411630293311  |
| H | -3.86203266541436 | -4.15827529323868 | 2.86884560973653  |
| H | -4.44671325097761 | -4.58555039501345 | 0.05819928127596  |
| H | -4.67199777785327 | -6.95708956522399 | -0.56761275416455 |
| H | -2.73900927565903 | -8.52143062906943 | -0.32036445567215 |
| H | -0.56223369382101 | -7.67307752479708 | 0.52027274772854  |
| H | 0.83585554636791  | -5.83991492130204 | 1.29774254113846  |
| H | 0.90538331352453  | -1.88468713458302 | 3.36430909056794  |
| H | 3.14038122860886  | -1.20770358198146 | 4.03126584031522  |
| C | 6.42257954986919  | -1.64450563548620 | 1.88623921855490  |
| H | 5.99639299334521  | -0.71445890167388 | 1.48663948602177  |
| H | 7.45992765787758  | -1.43945221172378 | 2.19118631298427  |
| H | 6.44880212861455  | -2.38052873190318 | 1.07155615461040  |
| C | 6.27980397737577  | -3.43399530763408 | 3.64255391789974  |
| H | 5.72121387347040  | -3.82748389795154 | 4.50396480730151  |
| H | 7.30777578224690  | -3.21292618336233 | 3.96814983017558  |
| H | 6.32582577479584  | -4.22420796817391 | 2.88015201151505  |
| H | 5.17965173266795  | -0.14073200503903 | 3.84351055568908  |
| H | 5.10917661794891  | -1.41106420179934 | 5.09246572967950  |

176  
3a

|   |                   |                   |                  |
|---|-------------------|-------------------|------------------|
| H | -4.19374944727435 | 1.40755845754065  | 5.74337365091787 |
| C | -4.76297415812402 | 1.38159471521984  | 4.80287524559929 |
| H | -4.62479158463767 | 0.39469062957896  | 4.33880381202047 |
| H | -5.82807435813883 | 1.48252728119777  | 5.05683868872278 |
| C | -4.35302523386681 | 2.52049029000729  | 3.85874853088389 |
| C | -2.87483687837751 | 2.44658455196743  | 3.45941866211533 |
| C | -1.98171132905085 | 1.50746698909577  | 3.99362355787339 |
| C | -0.62302572258802 | 1.51617386564291  | 3.67033551704947 |
| C | -0.10040863243890 | 2.47972427128497  | 2.79608981258419 |
| C | -0.99985940011680 | 3.39691006090544  | 2.22409768660156 |
| C | -2.34989543526815 | 3.38019941825554  | 2.55027196693777 |
| H | -3.00526861800012 | 4.11464353454958  | 2.07962282184825 |
| H | -0.63582178285840 | 4.12138375414495  | 1.49391975857992 |
| C | 1.34116377891059  | 2.59948036899705  | 2.48426744597002 |
| C | 1.92690907855997  | 3.85260035362881  | 2.38195700600952 |
| C | 3.27403014886891  | 4.03359363629712  | 1.99379372268171 |
| C | 3.82382868534781  | 5.33415761849432  | 1.83462731114623 |
| C | 5.11439551270809  | 5.50853787924504  | 1.38543328056707 |
| C | 5.90939119440313  | 4.38127553173246  | 1.07481685087387 |
| C | 5.41156364282016  | 3.10468075158079  | 1.23635828782379 |
| C | 4.09154325458319  | 2.88878898157229  | 1.71309318787221 |
| C | 3.52128669766541  | 1.58379162050794  | 1.86815639623471 |
| C | 2.18535308225660  | 1.48234926157456  | 2.23274882171106 |
| O | 1.63488630508418  | 0.19095731989603  | 2.32125764125345 |
| P | 1.25626838492478  | -0.49157077686960 | 0.90377308558916 |
| N | 0.10444000786271  | 0.37767398854687  | 0.24322196865865 |

|   |                   |                   |                   |
|---|-------------------|-------------------|-------------------|
| P | -1.14403778607825 | 0.12626485537711  | -0.63599643259458 |
| N | -1.43681247233792 | -1.43444272889494 | -1.16979788647255 |
| H | -1.41557900493857 | -2.15781032285772 | -0.38877244313860 |
| S | -1.17710479048908 | -2.10288579410003 | -2.67115768100826 |
| O | -0.31141754889137 | -1.27438143037445 | -3.47770640740959 |
| O | -0.96173659460519 | -3.51526103616315 | -2.46314304768834 |
| C | -2.89458536607165 | -1.95402099357041 | -3.43575302237194 |
| F | -3.79215424055753 | -2.61521348928408 | -2.68824378269475 |
| F | -3.26205003228141 | -0.66651671013234 | -3.53517130705233 |
| F | -2.85113557316565 | -2.49886925803907 | -4.66379616244139 |
| O | -1.21399523230931 | 0.99326513124149  | -1.97603259725407 |
| C | -1.34019457874213 | 2.38510274262896  | -1.73330972112381 |
| C | -2.59326902902204 | 2.85195588549713  | -1.37329912992373 |
| C | -2.72488271448620 | 4.23496121449208  | -1.02449784197487 |
| C | -3.93324226193012 | 4.79312458081379  | -0.53180094301659 |
| C | -4.00364523639460 | 6.12241006913085  | -0.16917089712903 |
| C | -2.87141032717979 | 6.96111899846967  | -0.28670025918166 |
| C | -1.68029107855899 | 6.44690762731406  | -0.75002625001114 |
| C | -1.56752906985393 | 5.07834714920248  | -1.11464714143112 |
| C | -0.33101811876733 | 4.53262943197864  | -1.53087609911567 |
| C | -0.17254088303138 | 3.18754413934343  | -1.82917847590634 |
| C | 1.15303212907080  | 2.64551109326058  | -2.19545211376404 |
| C | 1.32901583641969  | 1.71460596018895  | -3.22874669574243 |
| C | 2.60602799996896  | 1.28941737968702  | -3.59660710453524 |
| C | 3.75567413013582  | 1.76737610994194  | -2.95325409596628 |
| C | 3.56685943874892  | 2.67453262282136  | -1.89705791712666 |
| C | 2.29927193535857  | 3.10281088690656  | -1.52291381530790 |
| H | 2.19222064579058  | 3.78431585799015  | -0.67742987791181 |
| H | 4.42537055831934  | 3.05635563539152  | -1.34315760621162 |
| C | 5.17445469084631  | 1.38031556586298  | -3.38444072904090 |
| C | 5.17978526254711  | 0.30917211967306  | -4.48416551167510 |
| H | 4.69267471294934  | -0.61898290015270 | -4.15157383718576 |
| H | 6.21817185093478  | 0.06334457009172  | -4.74942515151956 |
| H | 4.67835668805270  | 0.65863591495798  | -5.39838290687785 |
| C | 5.97169363744359  | 0.84147190210500  | -2.18068091252379 |
| H | 5.51937092616954  | -0.07568408298476 | -1.78170364534216 |
| H | 6.02421899630946  | 1.57500346269374  | -1.36495348031957 |
| H | 7.00163956807014  | 0.60645497901689  | -2.48857120634148 |
| C | 5.87430239052693  | 2.64556501232821  | -3.92534548850879 |
| H | 5.93004953540496  | 3.42958491670545  | -3.15699675063395 |
| H | 5.33059864126973  | 3.05558948474982  | -4.78878792277680 |
| H | 6.89994459817116  | 2.40513377440436  | -4.24442632829348 |
| H | 2.69313294484297  | 0.57328782939830  | -4.41316883022224 |
| H | 0.46695512074983  | 1.32163218632069  | -3.76567823917107 |
| H | 0.53339524725978  | 5.19441727737438  | -1.61119009023045 |
| H | -0.79514142607621 | 7.08116851472106  | -0.83204071000819 |
| H | -2.94196796015956 | 8.01178535955711  | -0.00196329106792 |
| H | -4.94046590986366 | 6.52816342074490  | 0.21549157433814  |
| H | -4.81044754584762 | 4.15548039464804  | -0.43219764208793 |
| C | -3.73364130259420 | 1.90567857900383  | -1.26425950789906 |
| C | -3.63345046676317 | 0.80266235123855  | -0.42982173930828 |
| C | -4.68956496717728 | -0.11612832934448 | -0.18411620170119 |
| C | -5.87434161463795 | 0.11199648102194  | -0.86822519208162 |
| C | -6.02583969823101 | 1.17004124267525  | -1.79335868298449 |
| C | -7.23252490838785 | 1.34597229491928  | -2.52180775496134 |
| C | -7.35835743825215 | 2.35648607503058  | -3.44960141300640 |
| C | -6.27464067953227 | 3.23166124876102  | -3.69267048292164 |
| C | -5.09491845561553 | 3.09964591172545  | -2.99008345884708 |

|   |                   |                   |                   |
|---|-------------------|-------------------|-------------------|
| C | -4.94093993922488 | 2.08310154566725  | -2.01212104596149 |
| H | -4.26302395750995 | 3.77484464651188  | -3.18853872300259 |
| H | -6.37057262073914 | 4.01503938781678  | -4.44581790339226 |
| H | -8.28815710230844 | 2.47631615893401  | -4.00740149793690 |
| H | -8.05637193572780 | 0.65299367650768  | -2.33901072738375 |
| H | -6.72359627412057 | -0.54919652424820 | -0.68638051128549 |
| C | -4.55058211793122 | -1.25784429193646 | 0.74412859553452  |
| C | -5.13340684920027 | -2.49682172243182 | 0.42489658110671  |
| C | -5.03106123828610 | -3.57845096011906 | 1.29115131341443  |
| C | -4.34388480545584 | -3.48206024482609 | 2.51282363382594  |
| C | -3.78087720018580 | -2.24131926934772 | 2.83203598029659  |
| C | -3.87455968936545 | -1.15227101239507 | 1.96849088021779  |
| H | -3.40386026057007 | -0.21315724477116 | 2.25502354995474  |
| H | -3.21840704707636 | -2.11716692905260 | 3.75604456008283  |
| C | -4.21221643288601 | -4.70959289799996 | 3.41711421583186  |
| C | -3.56688937541831 | -5.86004688539595 | 2.61675231652413  |
| H | -3.43469690752883 | -6.74029113231427 | 3.26383152527629  |
| H | -4.18960728014253 | -6.16151834049330 | 1.76313773275973  |
| H | -2.58372632359159 | -5.56192558681734 | 2.22968417341776  |
| C | -3.33896246452464 | -4.42874099422913 | 4.64822395626108  |
| H | -3.77663009824711 | -3.64779779022861 | 5.28764923991224  |
| H | -2.32417706286109 | -4.11518953172286 | 4.36472786417993  |
| H | -3.25510357055706 | -5.34337578001842 | 5.25282157542716  |
| C | -5.61510969451529 | -5.13960836083620 | 3.89205061750520  |
| H | -6.09325936940674 | -4.33942414330130 | 4.47573182931343  |
| H | -6.27215134295405 | -5.37916225481856 | 3.04399557478493  |
| H | -5.54260729245799 | -6.03458207968167 | 4.52862460775680  |
| H | -5.47953046991516 | -4.52818270211721 | 0.99475564306181  |
| H | -5.64173977978109 | -2.62054448724773 | -0.53293305782731 |
| O | -2.40991005239324 | 0.58535572755145  | 0.23385177151220  |
| N | 1.09411360924004  | -2.05578516361645 | 1.08640933148842  |
| S | -0.04855664189035 | -2.84737446313045 | 1.83348361324289  |
| O | -0.29835874848826 | -2.46549987005920 | 3.21458814164159  |
| O | -1.23371978645397 | -3.06727668250523 | 0.97798114717426  |
| C | 0.78094074487402  | -4.53297259947104 | 1.88923675287257  |
| F | 1.97276476338390  | -4.45427978342155 | 2.50722639716675  |
| F | -0.01178891176680 | -5.37622615731661 | 2.58444966098487  |
| F | 0.95606860118084  | -5.02237486207321 | 0.65199528430962  |
| O | 2.56105489731279  | -0.22453911199301 | 0.00091597650436  |
| C | 3.80186163479980  | -0.52182439420735 | 0.58920193323070  |
| C | 4.29056664087333  | 0.35343191736124  | 1.54845064466594  |
| C | 5.51574014733434  | 0.02058276627517  | 2.21030938655322  |
| C | 6.03090326243295  | 0.77376224290011  | 3.29710937145874  |
| C | 7.21778607730747  | 0.41969348665008  | 3.90460840682718  |
| C | 7.94847585981598  | -0.70412434506355 | 3.45487966491818  |
| C | 7.46116824086833  | -1.47191178095051 | 2.41993528904688  |
| C | 6.23316703755493  | -1.14672132767048 | 1.78441126054992  |
| C | 5.69902440464900  | -1.96142292936970 | 0.75952766274575  |
| C | 4.47674179716854  | -1.69734268197851 | 0.16091374570321  |
| C | 3.90749947843552  | -2.61427118828206 | -0.84945570369948 |
| C | 4.03042866134690  | -4.00294070809509 | -0.67401243656190 |
| C | 3.50901347188290  | -4.89119556529796 | -1.60667826006809 |
| C | 2.83955007897031  | -4.44338482942444 | -2.75743414010525 |
| C | 2.72684157649241  | -3.05804162329976 | -2.93075856143427 |
| C | 3.24481864387604  | -2.15922932796938 | -1.99892024303883 |
| H | 3.12374761473307  | -1.09108920649547 | -2.17348292302846 |
| H | 2.20885556023270  | -2.65481142506688 | -3.79993277955158 |
| C | 2.25555836823629  | -5.45776440498580 | -3.74424833753327 |

|   |                   |                   |                   |
|---|-------------------|-------------------|-------------------|
| C | 1.55697264500985  | -4.77862113035205 | -4.93046790515244 |
| H | 1.16038813963960  | -5.54729601645744 | -5.60953893394358 |
| H | 0.71417209146620  | -4.15589489862157 | -4.60069424575890 |
| H | 2.25188103704686  | -4.15028562526031 | -5.50704063750999 |
| C | 3.39220207240075  | -6.34599366666704 | -4.29036191405158 |
| H | 3.90669246070433  | -6.88774389035639 | -3.48451227615846 |
| H | 4.14055410785528  | -5.74097729676888 | -4.82294211411997 |
| H | 2.98692044694337  | -7.09015831520597 | -4.99276762974466 |
| C | 1.22218913423992  | -6.33810397295038 | -3.01010507317957 |
| H | 1.67925890512863  | -6.88620493368501 | -2.17454020742148 |
| H | 0.40456524315297  | -5.72446912562551 | -2.60887883112324 |
| H | 0.79520827337714  | -7.07690291452392 | -3.70550832296302 |
| H | 3.60680081436150  | -5.96182011492568 | -1.41879020860108 |
| H | 4.50417793896256  | -4.38858113732773 | 0.23052755715292  |
| H | 6.26868457772053  | -2.83442078637273 | 0.43520292960799  |
| H | 8.00505054576105  | -2.35541270390247 | 2.07910649371640  |
| H | 8.88936616983257  | -0.96934504188056 | 3.93916776201316  |
| H | 7.59257407882656  | 1.00840985290548  | 4.74319330320437  |
| H | 5.47136111648202  | 1.63754192686130  | 3.65501130523668  |
| H | 6.03365299597281  | 2.24547271076668  | 0.99045810865231  |
| H | 6.92477637203325  | 4.52108819287031  | 0.70079045897105  |
| H | 5.52202965543368  | 6.51264565960457  | 1.26026645487145  |
| H | 3.19344645264644  | 6.19611530964100  | 2.06376672507481  |
| H | 1.32292326434449  | 4.73597870674462  | 2.59787476343683  |
| H | 0.03292192771505  | 0.77093277269000  | 4.11862265409825  |
| H | -2.33788112430739 | 0.74977947465011  | 4.69132412520482  |
| C | -5.24954509843433 | 2.46228225372232  | 2.60578330312493  |
| H | -5.01336921950613 | 3.27006802163601  | 1.89986871887560  |
| H | -5.13562136466142 | 1.50646529621280  | 2.07773555777954  |
| H | -6.30618240059669 | 2.56553569604016  | 2.89530602064395  |
| C | -4.59011946843294 | 3.86385350670302  | 4.58181768571884  |
| H | -4.35049349859199 | 4.71630401543404  | 3.93074972716077  |
| H | -3.96382391468734 | 3.93927105654192  | 5.48247852417224  |
| H | -5.64463921444487 | 3.95083923647399  | 4.88521275325946  |

128  
3d

|   |                   |                   |                   |
|---|-------------------|-------------------|-------------------|
| C | -2.14736307521752 | 1.12796960777195  | 4.55995744472603  |
| C | -2.21269080079390 | 2.12502885596579  | 3.58428009071708  |
| C | -1.07580798599039 | 2.46333208520452  | 2.85421170012653  |
| C | 0.14959176933863  | 1.81282830848285  | 3.07861502962461  |
| C | 0.20334149161172  | 0.81085947023487  | 4.06303503155070  |
| C | -0.93486968016321 | 0.47508241691702  | 4.79468422781194  |
| H | -0.87169365246691 | -0.30463529167820 | 5.55532556900312  |
| H | 1.14075034862405  | 0.29431162415116  | 4.26176105144241  |
| C | 1.33363904800822  | 2.22117389934415  | 2.28675970990528  |
| C | 1.55235604754892  | 3.55673154926424  | 1.98951001621622  |
| C | 2.62022639810615  | 3.98284419325918  | 1.16789515177818  |
| C | 2.78362565592574  | 5.35352784320246  | 0.83278880506989  |
| C | 3.77922817390481  | 5.75954542490719  | -0.02875593548678 |
| C | 4.65558550585459  | 4.80289779679324  | -0.59145415071662 |
| C | 4.54122913416043  | 3.46750490172734  | -0.26406826809246 |
| C | 3.53693523483747  | 3.01725571232473  | 0.63402303153407  |
| C | 3.36557721677279  | 1.63696916796850  | 0.98120053505343  |
| C | 2.27305449923316  | 1.28692961392235  | 1.76439238156885  |
| O | 2.08942490687409  | -0.06826300182134 | 2.06589623744996  |
| P | 1.50603886029539  | -1.01723554918038 | 0.89350404679855  |
| N | 0.02191919041945  | -0.59379570980515 | 0.57446467658240  |
| P | -1.28749586137285 | -0.59157834204322 | -0.23196329277926 |

|   |                   |                   |                   |
|---|-------------------|-------------------|-------------------|
| N | -1.65787715165737 | -2.11960550941528 | -0.77184598491368 |
| S | -2.92043895889532 | -2.64159290794023 | -1.71846926507902 |
| O | -3.35243613067050 | -3.92901298841977 | -1.23328286910051 |
| O | -3.81111665655446 | -1.53300315311173 | -1.97613761505945 |
| C | -2.02478826683265 | -3.00165615830200 | -3.33775133367045 |
| F | -1.46513145842163 | -1.88356810927703 | -3.83411682775114 |
| F | -1.06811573957576 | -3.92086791068388 | -3.13855881074026 |
| F | -2.92271525176824 | -3.47275829091812 | -4.21878327864744 |
| H | -1.04857763081249 | -2.87567043231505 | -0.34732591620570 |
| O | -1.39494687752972 | 0.30202904790224  | -1.56319250596683 |
| C | -1.26346020152609 | 1.69952889031018  | -1.37416248879911 |
| C | -2.28961249907744 | 2.37856052580277  | -0.73609087259194 |
| C | -2.06646331866870 | 3.74982643008180  | -0.37882211683857 |
| C | -2.97720024605211 | 4.48800157008935  | 0.42153057220774  |
| C | -2.70258373870577 | 5.78925009453554  | 0.78887362463227  |
| C | -1.51323218508150 | 6.42270882934065  | 0.36013414885400  |
| C | -0.60643379913144 | 5.73120212160580  | -0.41322788875153 |
| C | -0.84528804031486 | 4.38162495876528  | -0.78452765964383 |
| C | 0.09576031889061  | 3.65650473086667  | -1.55041673237321 |
| C | -0.07779971576906 | 2.31772523643831  | -1.86124245774158 |
| C | 0.90504660631874  | 1.61629691434620  | -2.71760458853063 |
| C | 2.27644616141254  | 1.87445974232400  | -2.56702911462508 |
| C | 3.21132734113429  | 1.29475603213094  | -3.42149958295244 |
| C | 2.79149278593989  | 0.45012183267807  | -4.45150842918844 |
| C | 1.42898799172789  | 0.18577330329642  | -4.61198865608033 |
| C | 0.49348019531754  | 0.75873365282812  | -3.75190001949456 |
| H | -0.56660769860945 | 0.55675557989242  | -3.89807450103993 |
| H | 1.08988862058644  | -0.47236314030198 | -5.41355167338153 |
| H | 3.52215231116397  | -0.01106222187036 | -5.11734777154980 |
| H | 4.27377993345555  | 1.49501954997118  | -3.27337357270384 |
| H | 2.61351681334378  | 2.52086415164294  | -1.75787317520139 |
| H | 0.98624903978131  | 4.17370327387950  | -1.91177046681097 |
| H | 0.32207575434232  | 6.20134146653281  | -0.74215297062084 |
| H | -1.31496181371143 | 7.45626131492688  | 0.64775562297676  |
| H | -3.40912223256714 | 6.33336681437081  | 1.41717145683955  |
| H | -3.89451206975998 | 4.00753050060412  | 0.75974231666510  |
| C | -3.57422274331830 | 1.70090170551657  | -0.42704373725773 |
| C | -3.60104833504702 | 0.53906779586782  | 0.32414528692643  |
| C | -4.78807368213070 | -0.14174835033189 | 0.70417207260735  |
| C | -5.98328129585977 | 0.39971366318418  | 0.26547255551480  |
| C | -6.03451939053108 | 1.54705150042504  | -0.55994139586178 |
| C | -7.27176591284573 | 2.04811963651689  | -1.04398675014182 |
| C | -7.31389740195423 | 3.13396169027100  | -1.89074454975094 |
| C | -6.11184726868336 | 3.75680806392728  | -2.29604176553613 |
| C | -4.89405732739986 | 3.30551794999675  | -1.83016731791336 |
| C | -4.81705452259792 | 2.20620073834429  | -0.93606426263227 |
| H | -3.97578689751131 | 3.79054866760868  | -2.15846887744130 |
| H | -6.14575692873272 | 4.59878717864867  | -2.98897639281245 |
| H | -8.27040507492245 | 3.50479620406131  | -2.26159359823471 |
| H | -8.19109214174778 | 1.54273067563288  | -0.74108919286007 |
| H | -6.91900923227582 | -0.08353830555050 | 0.55312209704948  |
| C | -4.75988344733384 | -1.39875216517631 | 1.48539574294483  |
| C | -3.97001677225432 | -1.54152317215489 | 2.63849378834076  |
| C | -3.98172104012376 | -2.73497158291581 | 3.35750265646588  |
| C | -4.76944555141404 | -3.80771125640775 | 2.93425449630031  |
| C | -5.55301459538274 | -3.67798573808509 | 1.78645675149723  |
| C | -5.55050433086177 | -2.48284095356643 | 1.06946316391563  |
| H | -6.13182387030671 | -2.39607060631905 | 0.15027906751901  |

|   |                   |                   |                   |
|---|-------------------|-------------------|-------------------|
| H | -6.15390805491283 | -4.51754734886301 | 1.43438152334522  |
| H | -4.76129809150326 | -4.74649643142994 | 3.48988179380251  |
| H | -3.35906561658487 | -2.83071303207446 | 4.24811914135952  |
| H | -3.34366130645369 | -0.71550116767223 | 2.97397162024869  |
| O | -2.38575047539357 | -0.00178387585953 | 0.76873325320842  |
| N | 1.88800501270709  | -2.46437204962466 | 1.41734394654902  |
| S | 1.09437747053856  | -3.82285177136147 | 1.30819910480757  |
| O | 0.08999839106354  | -3.88011536451469 | 0.22872060209266  |
| O | 1.98489521680640  | -4.95306013560558 | 1.44638940458215  |
| C | 0.05779213929599  | -3.80750536211321 | 2.87827384563164  |
| F | 0.84563602674799  | -3.77120801867990 | 3.96846472509077  |
| F | -0.71245140168690 | -4.90908101270128 | 2.93217887313310  |
| F | -0.74576802966476 | -2.71738588574457 | 2.89545093089576  |
| O | 2.36580855852111  | -0.56289029101380 | -0.39882996873273 |
| C | 3.75729292162449  | -0.50121327272510 | -0.22347399458267 |
| C | 4.27913340581045  | 0.57790876767459  | 0.47671251310822  |
| C | 5.68921515054683  | 0.59906497930861  | 0.73307888070162  |
| C | 6.30799246433025  | 1.57907987237377  | 1.55253450920710  |
| C | 7.66939527445553  | 1.56143224587000  | 1.77516025800422  |
| C | 8.48131462890735  | 0.56288821514331  | 1.19060361701288  |
| C | 7.90761155159133  | -0.42112012752193 | 0.41560273639627  |
| C | 6.50713307519325  | -0.44347969989080 | 0.18082145296400  |
| C | 5.90622212098832  | -1.49010133307155 | -0.55828207777601 |
| C | 4.53798757284213  | -1.56193599190002 | -0.75569214164419 |
| C | 3.91504951356124  | -2.71709355999695 | -1.44110150745383 |
| C | 2.94185681140650  | -2.54547070209069 | -2.43918808854183 |
| C | 2.36997739099871  | -3.65083596426938 | -3.06483031839925 |
| C | 2.74688840320905  | -4.94424405017326 | -2.69606974097746 |
| C | 3.70923366077707  | -5.12498416473086 | -1.70182482840137 |
| C | 4.29210847084451  | -4.02058248631267 | -1.08223831057761 |
| H | 5.00987291005889  | -4.16573543981933 | -0.27357236635182 |
| H | 3.98896683255062  | -6.13041965712951 | -1.38527494631195 |
| H | 2.27983464735877  | -5.80847413540155 | -3.17051943289705 |
| H | 1.61576113254807  | -3.49915731132582 | -3.83857017637480 |
| H | 2.63730991375699  | -1.54215697417303 | -2.73102237169220 |
| H | 6.54253790837638  | -2.27579177928752 | -0.97077695802138 |
| H | 8.51994031353901  | -1.21340692289537 | -0.02006899098319 |
| H | 9.55752581835251  | 0.56389895205155  | 1.36900788936792  |
| H | 8.12189893746875  | 2.32128289518645  | 2.41405765846705  |
| H | 5.69202250816358  | 2.34812919181758  | 2.01710950651028  |
| H | 5.22245558089899  | 2.74011879587937  | -0.70389602457776 |
| H | 5.42972463557321  | 5.12296752868639  | -1.29032661014316 |
| H | 3.89012172386876  | 6.81452747941167  | -0.28378834904694 |
| H | 2.08943842361568  | 6.07727007617015  | 1.26445728387139  |
| H | 0.86887714116353  | 4.30895278449654  | 2.38732239635645  |
| H | -1.14380928505573 | 3.22420619261097  | 2.07706570091056  |
| H | -3.15590840393967 | 2.63464302198283  | 3.37923184866308  |
| H | -3.03675302396352 | 0.85781866959539  | 5.13162056255453  |

228

A-E

|   |                   |                   |                   |
|---|-------------------|-------------------|-------------------|
| C | 1.08210904223429  | -4.23710061291993 | -0.22207131552033 |
| C | -0.14473501501807 | -4.47326810821779 | 0.62345095118567  |
| C | -0.74934392207649 | -5.88509344443209 | 0.52375855850941  |
| C | -1.68201136325688 | -6.07820490495288 | -0.67097691651608 |
| O | -1.03917207671579 | -5.87872361670111 | -1.92950668208808 |
| H | 0.13436820165764  | -4.27807724394495 | 1.67050705671165  |
| H | -1.33297678263682 | -6.08797337823897 | 1.43813561521457  |
| H | -2.54863335881850 | -5.39880145780016 | -0.57325729345339 |

|   |                   |                   |                   |
|---|-------------------|-------------------|-------------------|
| C | 2.26643820326746  | -5.10849712475874 | -0.02779236275757 |
| C | 3.12489482149995  | -5.38642050543235 | -1.10662070865301 |
| C | 2.58340745975872  | -5.66060523941335 | 1.22562908481624  |
| C | 4.27830766335745  | -6.14773036765451 | -0.93260426932327 |
| H | 2.86662693975671  | -5.00779442508940 | -2.09521563921262 |
| C | 3.74006734792739  | -6.41898237346144 | 1.40275045665893  |
| H | 1.93780809470795  | -5.46388864541084 | 2.08026503402185  |
| C | 4.59729722989168  | -6.66116287190486 | 0.32693956849815  |
| H | 4.92730823548311  | -6.35032637128840 | -1.78671472452462 |
| H | 3.97406895893720  | -6.82221677642306 | 2.38954603113534  |
| H | 5.50138134400826  | -7.25578842716465 | 0.46673818150840  |
| C | 1.13701587785102  | -3.21514777779194 | -1.10563844784223 |
| H | 2.02970699096113  | -3.01856163148811 | -1.69866490562432 |
| H | 0.24818719154304  | -2.62404880988932 | -1.31940801941810 |
| H | 2.77952189822210  | 5.31115210949955  | -5.13881760786082 |
| C | 2.60625082928246  | 4.49827003929883  | -5.85799644685453 |
| C | 2.49938480391232  | 3.13182655529416  | -5.14834642112497 |
| H | 3.44321045028479  | 4.49028663784855  | -6.57283571284588 |
| H | 1.68280742862237  | 4.72562925667492  | -6.40987836664261 |
| C | 1.32463290689536  | 3.18691295847607  | -4.16561760950656 |
| C | 3.81186694583291  | 2.85577829106825  | -4.38904750142177 |
| C | 2.32009082969344  | 2.04129274166831  | -6.21390920694532 |
| C | 2.35626613738074  | -0.69290931968486 | -3.36777932806799 |
| C | 1.34027464269975  | 4.10381791838428  | -3.10067232169713 |
| C | 0.18825083372850  | 2.37685552456215  | -4.29036971302176 |
| H | 4.00401235019524  | 3.61890005127678  | -3.62325887213066 |
| H | 3.78418863896700  | 1.87598220028976  | -3.89448116925898 |
| H | 4.66026407530202  | 2.85811438645739  | -5.09009126215150 |
| H | 1.42067472975381  | 2.21046831275526  | -6.82354171191743 |
| H | 3.18638134782413  | 2.04668405345400  | -6.89118387748668 |
| H | 2.25462267567436  | 1.03921173672746  | -5.76618282133297 |
| C | 3.58539819599147  | -0.93804755399140 | -2.72299470422062 |
| C | 1.79199113192984  | -1.63783184297109 | -4.21553574451961 |
| H | 1.82462244870409  | 0.24247362282024  | -3.20906996975870 |
| C | 0.26700207316764  | 4.22047041115460  | -2.22481772678600 |
| H | 2.21036151344834  | 4.74255921338117  | -2.94141630427321 |
| C | -0.89248311487581 | 2.48799582505220  | -3.41527270428529 |
| H | 0.12552017434773  | 1.63885383709227  | -5.08943512360279 |
| C | 4.23545732019499  | 0.05581411977068  | -1.83857384786472 |
| C | 4.22271277916530  | -2.15911324754672 | -2.99671588170293 |
| C | 2.42328966748546  | -2.86284446494810 | -4.48804388610192 |
| H | 0.81641202468109  | -1.41650012974080 | -4.65056411746633 |
| C | -0.88228039056192 | 3.42447220935329  | -2.37157477849043 |
| H | 0.32961245950642  | 4.92551252417452  | -1.39459954631233 |
| H | -1.75061571829399 | 1.83480251857070  | -3.55877502567620 |
| C | 3.50066470477186  | 0.98046005870024  | -1.04112438281706 |
| C | 5.61797706846965  | 0.16701558573267  | -1.78865078529074 |
| C | 3.66040052482319  | -3.08990140438530 | -3.86984936648062 |
| H | 5.16060371964223  | -2.40454006834594 | -2.49753120514758 |
| C | 1.73601911504948  | -3.89264550956103 | -5.38557910078769 |
| C | -2.02873022494815 | 3.62078932027314  | -1.45620867907560 |
| O | 2.10385976615605  | 0.86553122627002  | -1.05388164037062 |
| C | 4.07540074358118  | 2.02531762800146  | -0.32775550035954 |
| H | 6.22592413659639  | -0.49070183709469 | -2.41152244291776 |
| C | 6.27545528467385  | 1.11129854703326  | -0.96871589272698 |
| H | 4.19433124112032  | -4.02377539542429 | -4.04311088662348 |
| C | 1.42145115693833  | -3.25136416619999 | -6.75253143334113 |
| C | 0.42172266304255  | -4.33575324733111 | -4.70865295202413 |

|   |                   |                   |                   |
|---|-------------------|-------------------|-------------------|
| C | 2.60783701274888  | -5.13386732464261 | -5.61983823121402 |
| C | -2.77478118772680 | 2.53607268916949  | -0.91814847583148 |
| C | -2.41163494333713 | 4.89155598110157  | -1.05721020553698 |
| P | 1.28480339162047  | 0.54184060218197  | 0.29061230573568  |
| C | 5.50325973760948  | 2.06074902611388  | -0.22116499625510 |
| C | 3.22403345236408  | 3.09698286350580  | 0.25582663902009  |
| C | 7.69240392442634  | 1.14889705412045  | -0.87703257222760 |
| H | 2.34214085980337  | -2.91639438068400 | -7.25272484641263 |
| H | 0.92144558778438  | -3.98366002199068 | -7.40366404487597 |
| H | 0.75453012832308  | -2.38474544025955 | -6.64978805494643 |
| H | -0.24812297296564 | -3.48552914470184 | -4.52095708573035 |
| H | -0.10956571358186 | -5.05439500668155 | -5.35037772333249 |
| H | 0.62036454364230  | -4.82819852187746 | -3.74625838366664 |
| H | 2.81882723554959  | -5.66792437184964 | -4.68157152905802 |
| H | 2.07679338584225  | -5.83340529752968 | -6.28075525656257 |
| H | 3.56453491156658  | -4.87872798281849 | -6.09997128314476 |
| O | -2.41846934092955 | 1.24366071499965  | -1.31397230297422 |
| C | -3.83244315255364 | 2.67254941627765  | -0.03076571284370 |
| H | -1.88579727089222 | 5.75653930775766  | -1.46629501621181 |
| C | -3.46103586447930 | 5.11045886710712  | -0.13415772836527 |
| O | 1.99510449782161  | 1.42020200422343  | 1.42517617966211  |
| N | -0.17707432836277 | 0.91431111783883  | -0.02087083076126 |
| N | 1.63598417789332  | -0.98779389022324 | 0.84778461222416  |
| C | 6.18353355589693  | 2.97625641260959  | 0.62198986168926  |
| C | 3.38938262287720  | 4.47132732376374  | -0.12469351935477 |
| C | 2.18383987341241  | 2.78352299326993  | 1.11355247712541  |
| H | 8.27056040368323  | 0.42643734653499  | -1.45568449632775 |
| C | 8.32389757389969  | 2.05933751049399  | -0.05792670076597 |
| P | -1.61995103302689 | 0.30783282786306  | -0.26205078535768 |
| C | -4.50868378714034 | 1.46225615541870  | 0.50975886273109  |
| C | -4.18455688007919 | 3.99297327020433  | 0.40339264350635  |
| C | -3.79110365019091 | 6.42285286696460  | 0.29847469303340  |
| S | 2.23066281301859  | -1.43438497556438 | 2.36431224908554  |
| H | 1.47405820209617  | -1.81824441198936 | 0.21730863989748  |
| C | 7.56031785173631  | 2.97232379844202  | 0.70491309627676  |
| H | 5.60333227555384  | 3.67650970499147  | 1.22166029484490  |
| C | 4.34709919586792  | 4.90209783572683  | -1.07932233875801 |
| C | 2.50386525034251  | 5.45036098389898  | 0.43935839840389  |
| C | 1.28629397083026  | 3.72349731188934  | 1.68665378866254  |
| H | 9.41250240332697  | 2.07150978386862  | 0.01161136741272  |
| O | -2.36331062069035 | 0.61264123570736  | 1.14134917868268  |
| N | -1.78495435607863 | -1.20819756169563 | -0.69581429696272 |
| C | -3.75685275903553 | 0.47371974547595  | 1.13218519556283  |
| C | -5.92408040342506 | 1.26824012476351  | 0.40667150972307  |
| C | -5.18043599193807 | 4.24674046706805  | 1.38294249397833  |
| H | -3.23906721298760 | 7.26350593260157  | -0.12738402991593 |
| C | -4.77191662309626 | 6.63447930546529  | 1.24240872202045  |
| O | 2.06223795740296  | -2.87067564494545 | 2.40599121466730  |
| O | 1.67320974600879  | -0.57624593842171 | 3.38749055100275  |
| H | 8.06277638975714  | 3.67098669275878  | 1.37477505456983  |
| H | 5.00754917635922  | 4.16936447900338  | -1.53876163286200 |
| C | 4.44307389493369  | 6.22985695816129  | -1.44223878511402 |
| C | 2.64116833420395  | 6.81138107470782  | 0.05604907582260  |
| C | 1.48853810346734  | 5.04946738837420  | 1.33898090081762  |
| C | 0.17861936892807  | 3.32945937640868  | 2.58367326401519  |
| S | -2.22577419835633 | -1.72523997150106 | -2.15433031135326 |
| C | -4.30921534386680 | -0.66695341300910 | 1.77680954698707  |
| C | -6.51259019974511 | 0.12869075655017  | 1.05007746810699  |



|   |                   |                   |                   |
|---|-------------------|-------------------|-------------------|
| C | -6.76308639640913 | 2.12905560323052  | -0.34654375047192 |
| C | -5.46514045174066 | 5.53290341087349  | 1.79371649539882  |
| H | -5.72187747941178 | 3.40880664199104  | 1.81853730759870  |
| H | -5.01031934035536 | 7.64716028452217  | 1.57041089224185  |
| H | 5.18123823614502  | 6.53291683264716  | -2.18621688563705 |
| C | 3.58968821482627  | 7.19736312944058  | -0.86523977946761 |
| H | 1.96582329414931  | 7.54584036112151  | 0.49979927462822  |
| H | 0.83747188321273  | 5.81263844113333  | 1.76967716678683  |
| C | 0.34263234645053  | 2.39212035716968  | 3.61222426102854  |
| C | -1.08400251247319 | 3.92903432565074  | 2.43994295784778  |
| O | -1.60590047314313 | -0.97826458462090 | -3.24781099205969 |
| O | -2.08864352020138 | -3.18125498915262 | -2.14709712253800 |
| C | -5.68939552360168 | -0.78987821468212 | 1.74130865653515  |
| C | -3.47938528051223 | -1.66910714804799 | 2.48266138289963  |
| C | -7.91633160309129 | -0.06625030347076 | 0.96096921401521  |
| C | -8.12065282673734 | 1.89826259794724  | -0.43217417686475 |
| H | -6.31928177767740 | 2.96993548519407  | -0.87776880587909 |
| H | -6.23030086956024 | 5.69922273351098  | 2.55350563821894  |
| H | 3.67861239172678  | 8.24466387660176  | -1.15690933241250 |
| C | -0.70937043994938 | 2.08279477681755  | 4.47415944560473  |
| H | 1.30038440726599  | 1.89540056990277  | 3.75348597350206  |
| C | -2.12589639062167 | 3.61842514994529  | 3.30581298412932  |
| H | -1.25903812664654 | 4.62692292634445  | 1.61967671299795  |
| H | -6.16138129374452 | -1.62903270701826 | 2.25426728836093  |
| C | -2.36883907292753 | -1.31146956684323 | 3.26953884241413  |
| C | -3.83246870578120 | -3.02587332602540 | 2.44061408868781  |
| H | -8.35353636811098 | -0.93470513193525 | 1.45716566144880  |
| C | -8.70678492364743 | 0.79970484604860  | 0.23677910238518  |
| H | -8.74359337425133 | 2.56215209098351  | -1.03295557818602 |
| F | 5.84986725757125  | 2.31879563122338  | 3.82486178551627  |
| C | -1.96456655586715 | 2.69277512883123  | 4.35080922893409  |
| H | -0.52985608339084 | 1.35059530010868  | 5.26073042342428  |
| H | -3.08924853116960 | 4.10598573249068  | 3.15144660453152  |
| C | -1.68922645256651 | -2.26611733029500 | 4.01821887887679  |
| H | -2.04139206942200 | -0.27390353236390 | 3.31540754601340  |
| C | -3.14410132560523 | -3.97683784320009 | 3.19449021274275  |
| H | -4.65924720636226 | -3.34590459110719 | 1.80377487507413  |
| H | -9.78193797644642 | 0.62973401303783  | 0.16444587829063  |
| C | 6.53780319215988  | 1.14524325735964  | 3.86813179180121  |
| C | -3.12206708201948 | 2.41664454281733  | 5.31631403982426  |
| C | -2.07324354887416 | -3.61791141176125 | 4.02378289992109  |
| H | -0.84211075151201 | -1.93782077432809 | 4.62336177953249  |
| H | -3.46424766020843 | -5.01655061907277 | 3.13297828885613  |
| F | 6.51773082266635  | 0.72945003724964  | 5.16724921158051  |
| C | 5.92633178040414  | 0.10218728900708  | 2.96452495076334  |
| F | 7.82979331916626  | 1.41259348572870  | 3.55559124902838  |
| C | -2.77758761659817 | 1.33133391824223  | 6.34587301746926  |
| C | -4.36886917995830 | 1.96131296070740  | 4.53324056482848  |
| C | -3.44994746205068 | 3.72389264465127  | 6.06863352487722  |
| C | -1.36950793339754 | -4.61229370947007 | 4.95368421043701  |
| C | 6.72631123437295  | -0.70434682154689 | 2.15852990305825  |
| C | 4.54165205423240  | -0.08894096558024 | 3.00814651998204  |
| H | -3.64008141229183 | 1.16889276199719  | 7.00820676225327  |
| H | -2.54459177083547 | 0.37126753838788  | 5.86256916142939  |
| H | -1.92459779544028 | 1.62102893292275  | 6.97673164883353  |
| H | -4.18534709176582 | 1.01443694447765  | 4.00877125399833  |
| H | -5.21156086812596 | 1.80913219196911  | 5.22436795000562  |
| H | -4.67371714232959 | 2.70754042144367  | 3.78795414316991  |

|   |                   |                   |                   |
|---|-------------------|-------------------|-------------------|
| H | -3.74699306017891 | 4.52130330699713  | 5.37302494882200  |
| H | -4.27953690632525 | 3.55855220315746  | 6.77282207424939  |
| H | -2.57836275665559 | 4.07786356994138  | 6.63809976393018  |
| C | 0.14634352976968  | -4.62377337683356 | 4.68261584273254  |
| C | -1.90115608401468 | -6.04245333650917 | 4.78810317201999  |
| C | -1.61732721024663 | -4.16657312065333 | 6.41132363228301  |
| C | 6.13837222935769  | -1.72135097611354 | 1.39709979702190  |
| H | 7.80206654149382  | -0.54168075756744 | 2.11821144156892  |
| C | 3.98247684100442  | -1.10663375158713 | 2.24504897043115  |
| H | 3.90363809963310  | 0.53287460538196  | 3.63494185479020  |
| H | 0.59276182474653  | -3.62527992956950 | 4.77234747589027  |
| H | 0.65137213541438  | -5.28972962062063 | 5.39852815122887  |
| H | 0.35829609332148  | -4.99024894245826 | 3.66904661463760  |
| H | -1.36366434285678 | -6.71517322804146 | 5.47181035466721  |
| H | -2.97239037705628 | -6.11170898155148 | 5.02678727726650  |
| H | -1.74905916663360 | -6.41727109185472 | 3.76518529806112  |
| H | -1.13267027104500 | -4.86568508076754 | 7.10973233484738  |
| H | -1.21114943411012 | -3.16277459046658 | 6.59768745263440  |
| H | -2.69354549631346 | -4.14339612119895 | 6.63578530267177  |
| C | 4.76335172425545  | -1.93749769771202 | 1.43764329545532  |
| C | 7.01948395844714  | -2.64285804843046 | 0.58829209171066  |
| H | 4.30645839312001  | -2.74634965327013 | 0.86551513786618  |
| F | 8.07746908646257  | -1.98266794750635 | 0.04074016125948  |
| F | 6.34368825685879  | -3.23880022236090 | -0.42639992138374 |
| F | 7.53483456932064  | -3.63587286156759 | 1.36494558606762  |
| C | -4.87323084285720 | -2.31154212431041 | -1.63618523574949 |
| C | -3.99637563493113 | -1.42561938044107 | -2.26031232370833 |
| H | -4.47885530553030 | -3.16597491855333 | -1.08624951504677 |
| C | -6.24817372488763 | -2.09956349526638 | -1.75023638316616 |
| C | -4.47265685555574 | -0.34243346929167 | -2.99244240444552 |
| C | -6.74480922654180 | -1.00886097288958 | -2.46737396819888 |
| C | -7.18983681596791 | -3.10701613209496 | -1.14141357222567 |
| C | -5.85073695573819 | -0.13396182022536 | -3.08383377564006 |
| H | -3.76776533800844 | 0.32108726126255  | -3.49053403042259 |
| H | -7.81705106326888 | -0.84021568799552 | -2.53873926439423 |
| F | -6.83258443306759 | -3.43250110275580 | 0.13690728788447  |
| F | -7.19263808766865 | -4.27243575014596 | -1.84764420644723 |
| F | -8.47285031037170 | -2.66503093470191 | -1.09752904047579 |
| C | -6.34517818495426 | 1.03222271701744  | -3.90067429953458 |
| F | -7.67912007544844 | 1.24275525386369  | -3.75967009872229 |
| F | -5.71216942354698 | 2.19115579485649  | -3.55762312622306 |
| F | -6.10859137161848 | 0.84240292489236  | -5.23061029311870 |
| H | -1.16574373625030 | -4.93735748564060 | -2.15785176118222 |
| H | -2.06868043308664 | -7.11094548318294 | -0.66578668440184 |
| H | 0.05273021085180  | -6.63855786250945 | 0.48489129657112  |
| H | -0.90394778634984 | -3.71718841044267 | 0.37227327707068  |

228

A-TS1

|   |           |           |           |
|---|-----------|-----------|-----------|
| C | 0.954186  | -4.171081 | -0.174685 |
| C | -0.229143 | -4.264120 | 0.735844  |
| C | -0.957058 | -5.616705 | 0.718866  |
| C | -1.756069 | -5.814272 | -0.565051 |
| O | -0.927735 | -5.660601 | -1.720360 |
| H | 0.149875  | -4.073884 | 1.754547  |
| H | -1.643318 | -5.661073 | 1.579062  |
| H | -2.588634 | -5.091851 | -0.599696 |
| C | 2.023372  | -5.174769 | -0.082946 |
| C | 2.750157  | -5.523315 | -1.235735 |

|   |           |           |           |
|---|-----------|-----------|-----------|
| C | 2.352001  | -5.800537 | 1.134090  |
| C | 3.779188  | -6.458369 | -1.174882 |
| H | 2.476709  | -5.073270 | -2.189029 |
| C | 3.394119  | -6.720903 | 1.197482  |
| H | 1.823048  | -5.521464 | 2.043884  |
| C | 4.109663  | -7.055552 | 0.044045  |
| H | 4.322098  | -6.727123 | -2.082693 |
| H | 3.652953  | -7.178678 | 2.153309  |
| H | 4.921011  | -7.783323 | 0.095715  |
| C | 1.117247  | -3.063159 | -0.994723 |
| H | 1.958299  | -3.035399 | -1.689802 |
| H | 0.215593  | -2.523445 | -1.293692 |
| H | 2.784268  | 5.304498  | -5.192393 |
| C | 2.612879  | 4.488197  | -5.908068 |
| C | 2.519183  | 3.123694  | -5.192966 |
| H | 3.446099  | 4.483804  | -6.627371 |
| H | 1.684815  | 4.707380  | -6.455551 |
| C | 1.350768  | 3.174119  | -4.202585 |
| C | 3.838184  | 2.858455  | -4.441033 |
| C | 2.340034  | 2.028414  | -6.253692 |
| C | 2.408096  | -0.730613 | -3.400324 |
| C | 1.369900  | 4.092159  | -3.138952 |
| C | 0.218357  | 2.357187  | -4.316767 |
| H | 4.030929  | 3.626027  | -3.679853 |
| H | 3.819403  | 1.881441  | -3.940489 |
| H | 4.682151  | 2.862265  | -5.147433 |
| H | 1.435404  | 2.189469  | -6.857815 |
| H | 3.201892  | 2.036792  | -6.936621 |
| H | 2.283807  | 1.027517  | -5.801879 |
| C | 3.623415  | -0.959372 | -2.725251 |
| C | 1.853747  | -1.702168 | -4.224771 |
| H | 1.881250  | 0.213905  | -3.282667 |
| C | 0.305472  | 4.200629  | -2.251677 |
| H | 2.236967  | 4.736666  | -2.987575 |
| C | -0.854302 | 2.460983  | -3.430915 |
| H | 0.151872  | 1.618866  | -5.115322 |
| C | 4.266871  | 0.067925  | -1.874758 |
| C | 4.250376  | -2.198729 | -2.929407 |
| C | 2.481685  | -2.940646 | -4.440137 |
| H | 0.892577  | -1.487053 | -4.694253 |
| C | -0.839181 | 3.395879  | -2.385758 |
| H | 0.372992  | 4.904887  | -1.421367 |
| H | -1.707827 | 1.800307  | -3.565591 |
| C | 3.519227  | 0.998163  | -1.097136 |
| C | 5.646948  | 0.195795  | -1.834703 |
| C | 3.697203  | -3.159393 | -3.777351 |
| H | 5.176531  | -2.428729 | -2.400669 |
| C | 1.820982  | -3.982494 | -5.345845 |
| C | -1.976391 | 3.583840  | -1.457215 |
| O | 2.127872  | 0.871620  | -1.110429 |
| C | 4.083851  | 2.051291  | -0.388107 |
| H | 6.260965  | -0.468787 | -2.444071 |
| C | 6.294377  | 1.159606  | -1.028804 |
| H | 4.225657  | -4.104346 | -3.901198 |
| C | 1.605767  | -3.370258 | -6.745530 |
| C | 0.456498  | -4.379495 | -4.744731 |
| C | 2.675542  | -5.248307 | -5.498523 |
| C | -2.720593 | 2.495154  | -0.923814 |

|   |           |           |           |
|---|-----------|-----------|-----------|
| C | -2.355200 | 4.851295  | -1.044042 |
| P | 1.349177  | 0.460578  | 0.243678  |
| C | 5.511786  | 2.104428  | -0.285448 |
| C | 3.216001  | 3.100875  | 0.210787  |
| C | 7.710646  | 1.211490  | -0.937544 |
| H | 2.563523  | -3.068648 | -7.194369 |
| H | 1.129711  | -4.107322 | -7.409311 |
| H | 0.955838  | -2.485804 | -6.704577 |
| H | -0.198487 | -3.509325 | -4.603171 |
| H | -0.057267 | -5.088178 | -5.411460 |
| H | 0.581065  | -4.870388 | -3.768961 |
| H | 2.826967  | -5.759763 | -4.536250 |
| H | 2.164541  | -5.956001 | -6.166593 |
| H | 3.661270  | -5.027298 | -5.934241 |
| O | -2.374500 | 1.207099  | -1.337670 |
| C | -3.773146 | 2.625537  | -0.029418 |
| H | -1.831972 | 5.719475  | -1.449567 |
| C | -3.396884 | 5.063362  | -0.110935 |
| O | 2.024695  | 1.392234  | 1.371541  |
| N | -0.129392 | 0.816102  | -0.054768 |
| N | 1.761509  | -1.052754 | 0.707041  |
| C | 6.183800  | 3.029382  | 0.554049  |
| C | 3.359364  | 4.483378  | -0.146248 |
| C | 2.185716  | 2.753968  | 1.069821  |
| H | 8.296105  | 0.490567  | -1.511261 |
| C | 8.333755  | 2.131198  | -0.122087 |
| P | -1.573727 | 0.247791  | -0.306532 |
| C | -4.456382 | 1.414074  | 0.499647  |
| C | -4.117895 | 3.942354  | 0.422392  |
| C | -3.721427 | 6.372576  | 0.335420  |
| S | 2.299072  | -1.483176 | 2.199772  |
| H | 1.470549  | -2.119631 | -0.081854 |
| C | 7.560861  | 3.039264  | 0.637119  |
| H | 5.597006  | 3.725173  | 1.152208  |
| C | 4.303423  | 4.944406  | -1.100602 |
| C | 2.467726  | 5.440975  | 0.444229  |
| C | 1.282904  | 3.674927  | 1.667810  |
| H | 9.422177  | 2.152731  | -0.051568 |
| O | -2.319964 | 0.525870  | 1.102713  |
| N | -1.786389 | -1.258658 | -0.781752 |
| C | -3.712515 | 0.410129  | 1.107705  |
| C | -5.875625 | 1.242118  | 0.410416  |
| C | -5.103516 | 4.189268  | 1.413924  |
| H | -3.171110 | 7.215794  | -0.087599 |
| C | -4.693949 | 6.577744  | 1.289298  |
| O | 2.291085  | -2.939355 | 2.204185  |
| O | 1.624925  | -0.760164 | 3.266427  |
| H | 8.055816  | 3.745714  | 1.304559  |
| H | 4.967742  | 4.227991  | -1.580132 |
| C | 4.381918  | 6.280162  | -1.437599 |
| C | 2.586850  | 6.810945  | 0.087377  |
| C | 1.465860  | 5.010047  | 1.344928  |
| C | 0.191591  | 3.252907  | 2.572820  |
| S | -2.234912 | -1.708122 | -2.255402 |
| C | -4.278027 | -0.717304 | 1.767180  |
| C | -6.476213 | 0.113994  | 1.062045  |
| C | -6.708345 | 2.116946  | -0.333436 |
| C | -5.383052 | 5.472293  | 1.837914  |

|   |           |           |           |
|---|-----------|-----------|-----------|
| H | -5.639930 | 3.348410  | 1.849938  |
| H | -4.928106 | 7.587963  | 1.627830  |
| H | 5.110462  | 6.606390  | -2.181355 |
| C | 3.523090  | 7.226379  | -0.833785 |
| H | 1.907288  | 7.528683  | 0.551775  |
| H | 0.812291  | 5.757780  | 1.798337  |
| C | 0.367912  | 2.278172  | 3.564573  |
| C | -1.069899 | 3.864802  | 2.477884  |
| O | -1.614100 | -0.934101 | -3.328730 |
| O | -2.110874 | -3.168027 | -2.313054 |
| C | -5.661105 | -0.813804 | 1.749945  |
| C | -3.460660 | -1.724044 | 2.482507  |
| C | -7.884107 | -0.056886 | 0.989600  |
| C | -8.070585 | 1.909448  | -0.403390 |
| H | -6.256122 | 2.950379  | -0.869229 |
| H | -6.140335 | 5.632917  | 2.606810  |
| H | 3.598210  | 8.280415  | -1.104474 |
| C | -0.668597 | 1.945591  | 4.436391  |
| H | 1.321847  | 1.765829  | 3.667629  |
| C | -2.096580 | 3.531013  | 3.353367  |
| H | -1.257083 | 4.593241  | 1.687617  |
| H | -6.144266 | -1.636213 | 2.279165  |
| C | -2.300385 | -1.385350 | 3.204748  |
| C | -3.876967 | -3.063685 | 2.524587  |
| H | -8.330510 | -0.916808 | 1.492524  |
| C | -8.667877 | 0.821632  | 0.273325  |
| H | -8.688866 | 2.583822  | -0.997294 |
| F | 5.439173  | 2.655943  | 3.789567  |
| C | -1.921477 | 2.567774  | 4.361308  |
| H | -0.477906 | 1.183516  | 5.191307  |
| H | -3.058791 | 4.030795  | 3.235408  |
| C | -1.627769 | -2.336886 | 3.963557  |
| H | -1.924255 | -0.364306 | 3.192732  |
| C | -3.204620 | -4.008199 | 3.300983  |
| H | -4.744911 | -3.375670 | 1.940648  |
| H | -9.746597 | 0.670269  | 0.213746  |
| C | 6.207477  | 1.545116  | 3.967616  |
| C | -3.060436 | 2.265664  | 5.340961  |
| C | -2.075553 | -3.665273 | 4.057124  |
| H | -0.732527 | -2.021740 | 4.502584  |
| H | -3.583589 | -5.030021 | 3.315269  |
| F | 6.081451  | 1.191897  | 5.279190  |
| C | 5.779671  | 0.418189  | 3.060588  |
| F | 7.500758  | 1.908104  | 3.775487  |
| C | -2.709073 | 1.130283  | 6.312734  |
| C | -4.332601 | 1.864546  | 4.569139  |
| C | -3.349813 | 3.542492  | 6.158401  |
| C | -1.360582 | -4.650870 | 4.987830  |
| C | 6.718032  | -0.308228 | 2.329124  |
| C | 4.424357  | 0.081270  | 3.012629  |
| H | -3.559087 | 0.949931  | 6.986614  |
| H | -2.499862 | 0.190373  | 5.781560  |
| H | -1.838418 | 1.380012  | 6.936459  |
| H | -4.172042 | 0.948333  | 3.985775  |
| H | -5.157020 | 1.679305  | 5.274216  |
| H | -4.652380 | 2.655107  | 3.877475  |
| H | -3.646316 | 4.375475  | 5.505486  |
| H | -4.167524 | 3.359721  | 6.872274  |

|   |           |           |           |
|---|-----------|-----------|-----------|
| H | -2.460308 | 3.855405  | 6.724160  |
| C | 0.109959  | -4.817206 | 4.557255  |
| C | -2.022937 | -6.035319 | 4.990412  |
| C | -1.405850 | -4.088448 | 6.424819  |
| C | 6.293080  | -1.382483 | 1.542528  |
| H | 7.770950  | -0.036390 | 2.363832  |
| C | 4.022729  | -0.988570 | 2.220043  |
| H | 3.683494  | 0.632972  | 3.589646  |
| H | 0.632415  | -3.854862 | 4.475936  |
| H | 0.649571  | -5.439536 | 5.287208  |
| H | 0.168997  | -5.318494 | 3.580705  |
| H | -1.479765 | -6.701120 | 5.676460  |
| H | -3.068270 | -5.987477 | 5.328674  |
| H | -2.002526 | -6.499597 | 3.993285  |
| H | -0.914977 | -4.786129 | 7.120100  |
| H | -0.890592 | -3.120923 | 6.495471  |
| H | -2.444596 | -3.944042 | 6.755317  |
| C | 4.943786  | -1.730078 | 1.480029  |
| C | 7.300056  | -2.234053 | 0.810562  |
| H | 4.609408  | -2.576288 | 0.878848  |
| F | 8.496145  | -1.610573 | 0.657267  |
| F | 6.863795  | -2.584480 | -0.433388 |
| F | 7.539399  | -3.397697 | 1.479153  |
| C | -4.880812 | -2.274145 | -1.706850 |
| C | -4.003911 | -1.393929 | -2.339036 |
| H | -4.489316 | -3.135812 | -1.166555 |
| C | -6.254803 | -2.046926 | -1.796886 |
| C | -4.479656 | -0.297987 | -3.052105 |
| C | -6.750824 | -0.944451 | -2.496400 |
| C | -7.196387 | -3.052156 | -1.184589 |
| C | -5.856900 | -0.073656 | -3.118635 |
| H | -3.775490 | 0.364013  | -3.553531 |
| H | -7.822093 | -0.763051 | -2.548533 |
| F | -6.817714 | -3.402992 | 0.080560  |
| F | -7.226101 | -4.206886 | -1.909496 |
| F | -8.472914 | -2.597529 | -1.109384 |
| C | -6.351700 | 1.106617  | -3.915178 |
| F | -7.682114 | 1.325978  | -3.754872 |
| F | -5.705093 | 2.255702  | -3.566571 |
| F | -6.133464 | 0.930006  | -5.250128 |
| H | -1.169615 | -4.795344 | -2.111482 |
| H | -2.187532 | -6.829526 | -0.582516 |
| H | -0.233482 | -6.438018 | 0.832519  |
| H | -0.928704 | -3.445667 | 0.511028  |

228

A-P

|   |                   |                   |                   |
|---|-------------------|-------------------|-------------------|
| C | 0.35000118224245  | -4.40574651798565 | -0.84692258760425 |
| C | -0.07991260806752 | -4.18930730737286 | 0.59915820062740  |
| C | -0.93422331025604 | -5.42219940956308 | 0.90656330180369  |
| C | -1.70489247886237 | -5.66381149924050 | -0.38796231432321 |
| O | -0.96330918742090 | -4.92632000951641 | -1.45091546040406 |
| H | 0.77947481178347  | -4.07778700379730 | 1.26796744249500  |
| H | -1.61572374398652 | -5.24317351480055 | 1.74620289875251  |
| H | -2.71284757018176 | -5.23200499870241 | -0.38180248062186 |
| C | 1.38427709014258  | -5.50476640951105 | -1.02190200666280 |
| C | 1.20319028418002  | -6.58440169386709 | -1.89259754650338 |
| C | 2.59862144390027  | -5.37984915722037 | -0.33073498900035 |
| C | 2.21656401494228  | -7.53126059746390 | -2.06565939538685 |

|   |                   |                   |                   |
|---|-------------------|-------------------|-------------------|
| H | 0.27126849540155  | -6.68299946095524 | -2.44948444430524 |
| C | 3.60902565484700  | -6.32333872480482 | -0.51034337407854 |
| H | 2.75325618116512  | -4.53992192890302 | 0.35008825656178  |
| C | 3.42300822454206  | -7.40305435193345 | -1.37780361507609 |
| H | 2.06093152964411  | -8.36778147416125 | -2.74887662693589 |
| H | 4.54848533666780  | -6.21279859604333 | 0.03378823903000  |
| H | 4.21486666585052  | -8.14076208768321 | -1.51560719990820 |
| C | 0.74145928245590  | -3.17053540362282 | -1.62593890209375 |
| H | 0.79444139502581  | -3.38397863074405 | -2.69842222936459 |
| H | 0.05682113731927  | -2.33871545528036 | -1.43600250186020 |
| H | 2.73510767081449  | 5.07836282358726  | -5.38427283482570 |
| C | 2.58423739427331  | 4.22408065724782  | -6.05880476789047 |
| C | 2.53392961066001  | 2.89294586447318  | -5.27847086996594 |
| H | 3.41391551286026  | 4.20907095645156  | -6.78204193579743 |
| H | 1.64746318538670  | 4.38977519331718  | -6.61036257644176 |
| C | 1.37096158922147  | 2.96088217698761  | -4.28256977327317 |
| C | 3.86607848924172  | 2.70401758540647  | -4.52460607563385 |
| C | 2.37658386309259  | 1.74768054079980  | -6.28831082464818 |
| C | 2.79007985189853  | -0.88217447225085 | -3.43168624652731 |
| C | 1.38133051592542  | 3.93175368399615  | -3.26795329866175 |
| C | 0.25330982453440  | 2.11768524330003  | -4.34260808473999 |
| H | 4.04434342408082  | 3.51884541511557  | -3.81017502460401 |
| H | 3.88000225659939  | 1.75837607575155  | -3.96671033231382 |
| H | 4.70382532058116  | 2.69029911954459  | -5.23809194542816 |
| H | 1.46011282341888  | 1.85588001651344  | -6.88643177912717 |
| H | 3.22971619498613  | 1.75170541308097  | -6.98208296959771 |
| H | 2.35758429236545  | 0.76592412625967  | -5.79499849637168 |
| C | 3.84444450266045  | -1.08122434530609 | -2.52250845913299 |
| C | 2.42787358574365  | -1.88078611602993 | -4.32848203655134 |
| H | 2.26001489846489  | 0.06929672822905  | -3.44951478382405 |
| C | 0.32129893756708  | 4.06963215024855  | -2.38179110723764 |
| H | 2.23834286406452  | 4.59643572787777  | -3.15372911681070 |
| C | -0.81734595672214 | 2.25015782232549  | -3.45597886939515 |
| H | 0.19513050753129  | 1.33710889916011  | -5.10111078897661 |
| C | 4.37278767758972  | 0.01914970543218  | -1.68523691647677 |
| C | 4.45802331288398  | -2.34202897861605 | -2.50619728643791 |
| C | 3.06764916427221  | -3.13204314556597 | -4.34766989841246 |
| H | 1.61811163915366  | -1.67414611368106 | -5.03130021600603 |
| C | -0.81336527825763 | 3.24360852737077  | -2.46555354578618 |
| H | 0.38504586060060  | 4.81628589665583  | -1.58974720848688 |
| H | -1.66066957884730 | 1.56893441926255  | -3.55013832127173 |
| C | 3.53272656087195  | 0.96194217210725  | -1.02918334129456 |
| C | 5.74010870763835  | 0.20386759911345  | -1.56391186725701 |
| C | 4.07113240766808  | -3.34716475416417 | -3.39438606913555 |
| H | 5.25098963209557  | -2.54259633868243 | -1.78319016891450 |
| C | 2.67078501084773  | -4.18022109100086 | -5.39296430535378 |
| C | -1.94209737432569 | 3.48797259549796  | -1.53879589291560 |
| O | 2.15351491826729  | 0.77577958258835  | -1.12266414208381 |
| C | 4.00853885500082  | 2.06959101381036  | -0.33880076004976 |
| H | 6.41599001268895  | -0.47832038710952 | -2.08177033811780 |
| C | 6.29345212260363  | 1.24757912791550  | -0.78760354214360 |
| H | 4.57083121285207  | -4.31326328025376 | -3.33313310199348 |
| C | 2.94299797759058  | -3.59979174070902 | -6.79676311714749 |
| C | 1.17061322685982  | -4.51452040837283 | -5.26688134157587 |
| C | 3.46840572761102  | -5.48258500392007 | -5.23952510779746 |
| C | -2.69936069126582 | 2.44622032547758  | -0.93446289114349 |
| C | -2.29017829814000 | 4.78369406391298  | -1.18802375119374 |
| P | 1.37063586275608  | 0.30753921550424  | 0.22280487728998  |

|   |                   |                   |                   |
|---|-------------------|-------------------|-------------------|
| C | 5.42438566213938  | 2.19539193905769  | -0.15216721827583 |
| C | 3.06139415785809  | 3.08601745658269  | 0.19132631944728  |
| C | 7.69734765250017  | 1.37052831310637  | -0.61564042160520 |
| H | 4.00665247998883  | -3.34739009322343 | -6.91502392857215 |
| H | 2.67353419087528  | -4.33482323011027 | -7.57038573760000 |
| H | 2.35740367996820  | -2.68756447447714 | -6.97670562376972 |
| H | 0.53983084014891  | -3.61889578397757 | -5.35330044800691 |
| H | 0.87267665243320  | -5.21412750658410 | -6.06250194457662 |
| H | 0.95810196827203  | -4.99195389266188 | -4.30001782866814 |
| H | 3.30544317601381  | -5.94550650185823 | -4.25569404036986 |
| H | 3.14642982489577  | -6.20203304251430 | -6.00655303726670 |
| H | 4.54747345793305  | -5.31607801564596 | -5.37158567508814 |
| O | -2.41404792953658 | 1.13006473790338  | -1.30876580262605 |
| C | -3.71551099332871 | 2.64947550555454  | -0.00997728728989 |
| H | -1.76181090348245 | 5.61745181912987  | -1.65390361786154 |
| C | -3.29787822062852 | 5.06986038239853  | -0.23914898461057 |
| O | 1.90511695280148  | 1.35194237918372  | 1.34657570079395  |
| N | -0.11779410462565 | 0.59923291110386  | -0.17710609233176 |
| N | 1.83119062505145  | -1.14640814808385 | 0.67425524524342  |
| C | 6.00312698904368  | 3.19242641339266  | 0.67481585483766  |
| C | 3.16109107684802  | 4.46677569976186  | -0.18120051520247 |
| C | 2.02485408186597  | 2.70451269637222  | 1.03087958732108  |
| H | 8.34733180864317  | 0.64495229800560  | -1.10834593408820 |
| C | 8.22870029515343  | 2.36246432067775  | 0.17988085576826  |
| P | -1.60628248657928 | 0.17852892801664  | -0.27111789877596 |
| C | -4.41103100055077 | 1.48678871497069  | 0.60401285966400  |
| C | -4.01430258251755 | 3.99529595601653  | 0.38615210189288  |
| C | -3.58552786682841 | 6.40924747324461  | 0.13836658914938  |
| S | 2.34633046285971  | -1.58440286331488 | 2.12594706600342  |
| H | 1.73774022276397  | -2.85656254659296 | -1.29529952435755 |
| C | 7.37072230713521  | 3.27154977202030  | 0.83931117906821  |
| H | 5.35169963792033  | 3.88913282392594  | 1.20008653262141  |
| C | 4.10348828575963  | 4.94704249978952  | -1.12789640602365 |
| C | 2.23336509736065  | 5.40158566467550  | 0.38841177616049  |
| C | 1.09874842276445  | 3.60929726259885  | 1.62253325625434  |
| H | 9.30864707391136  | 2.43785528505659  | 0.31476887687785  |
| O | -2.27762423871099 | 0.55296250804497  | 1.15181189219657  |
| N | -2.01215559050102 | -1.33549416683218 | -0.66221984868937 |
| C | -3.67303853871576 | 0.48317671714488  | 1.22012858828971  |
| C | -5.83860497661852 | 1.36280429165571  | 0.58937730395943  |
| C | -4.94898664955983 | 4.31732761810543  | 1.40517572999046  |
| H | -3.03964917170483 | 7.21571987200815  | -0.35592883623424 |
| C | -4.51535134555197 | 6.68729696971193  | 1.11576444375728  |
| O | 2.54090008631342  | -3.03666866322262 | 2.09492334704954  |
| O | 1.56046816471364  | -1.02389062058559 | 3.22561653527755  |
| H | 7.79098966895700  | 4.03445159585533  | 1.49589405525194  |
| H | 4.79574897489066  | 4.24470859215703  | -1.58953417578052 |
| C | 4.14485779978720  | 6.28106757719204  | -1.47828146684460 |
| C | 2.31391690391566  | 6.77097234383554  | 0.01847193583071  |
| C | 1.24350429975003  | 4.94726294726795  | 1.29020369203316  |
| C | 0.03879029348048  | 3.17631661026784  | 2.56013681443120  |
| S | -2.59183824345653 | -1.76311017846040 | -2.06468694106415 |
| C | -4.24648087035304 | -0.60547494370815 | 1.93787909516122  |
| C | -6.44617824047682 | 0.28668805744304  | 1.31757939957330  |
| C | -6.67712536988948 | 2.23806520487308  | -0.14780377733001 |
| C | -5.19312120075821 | 5.62779540180958  | 1.76097813353934  |
| H | -5.47303160272604 | 3.51305570026787  | 1.91852756818419  |
| H | -4.72195907265849 | 7.71971472044336  | 1.40106735786504  |



|   |                   |                   |                   |
|---|-------------------|-------------------|-------------------|
| H | 4.87335448684533  | 6.62304084744643  | -2.21510874837491 |
| C | 3.24840908734557  | 7.20603058418461  | -0.89572426443485 |
| H | 1.60723225002855  | 7.47213112460768  | 0.46778847093163  |
| H | 0.57461495373837  | 5.68142206500992  | 1.74323317619957  |
| C | 0.24296411699121  | 2.18533455341982  | 3.53217267655146  |
| C | -1.21468578563815 | 3.81148624400097  | 2.53746556584640  |
| O | -1.97639599964576 | -1.15609904840884 | -3.23640599420979 |
| O | -2.63450237221114 | -3.26744816301703 | -2.06668158507872 |
| C | -5.63108116021912 | -0.65060685149827 | 1.99212542649418  |
| C | -3.42822580395450 | -1.62504504619488 | 2.63226665716417  |
| C | -7.86174084786333 | 0.17403077459497  | 1.33173803175893  |
| C | -8.04862366331926 | 2.08732546151623  | -0.13239707425923 |
| H | -6.22364900458344 | 3.02981515865193  | -0.74229232267489 |
| H | -5.91194464413474 | 5.84654585325063  | 2.55215022025977  |
| H | 3.29468531035638  | 8.25928530913323  | -1.17603706671561 |
| C | -0.75358090383433 | 1.86623698171226  | 4.45440716934465  |
| H | 1.18700811700181  | 1.64805384551030  | 3.58069545060880  |
| C | -2.20172885008521 | 3.48848592912233  | 3.46077188298290  |
| H | -1.42781096865718 | 4.55530792676945  | 1.76872922596992  |
| H | -6.11584822400853 | -1.43672288988554 | 2.57274511337685  |
| C | -2.21513062588121 | -1.30858665075461 | 3.27125292951711  |
| C | -3.87960793188746 | -2.95106352383447 | 2.72688912926109  |
| H | -8.31281657345564 | -0.64396977342459 | 1.89653102145123  |
| C | -8.64977302936192 | 1.05648304448131  | 0.62493257238837  |
| H | -8.67178679406361 | 2.76331124847210  | -0.71935918482280 |
| F | 4.88450246585522  | 2.91546733986574  | 3.83369013892509  |
| C | -1.99628806127494 | 2.51267600063004  | 4.44962757067365  |
| H | -0.53876593240156 | 1.09349520354314  | 5.19192984782488  |
| H | -3.15684717034419 | 4.01076972777114  | 3.39745160264816  |
| C | -1.50781187541271 | -2.26984853780045 | 3.98273360193803  |
| H | -1.81828101716390 | -0.29717010944548 | 3.22655695414416  |
| C | -3.17124643193229 | -3.90706324325261 | 3.45791812801607  |
| H | -4.80148989146739 | -3.24376711134916 | 2.21961034485315  |
| H | -9.73550695444075 | 0.95073354834605  | 0.63484922870357  |
| C | 5.73144598139124  | 1.89604052051181  | 4.15371015787543  |
| C | -3.09319612775540 | 2.22216245634101  | 5.47905163232239  |
| C | -1.97141250980380 | -3.58891944102429 | 4.11130337059733  |
| H | -0.56379185504334 | -1.97224583926948 | 4.44040068205533  |
| H | -3.57435751674522 | -4.91865896063253 | 3.51635237048837  |
| F | 5.49140174994949  | 1.59101118893603  | 5.46220796056411  |
| C | 5.52238173218542  | 0.69638185055113  | 3.26558949283640  |
| F | 6.99713629223427  | 2.38425457077790  | 4.08625935562971  |
| C | -2.72124058451007 | 1.06425828691139  | 6.41598446792124  |
| C | -4.40873927358261 | 1.85902230401972  | 4.76260561461152  |
| C | -3.31398904931279 | 3.49212895783001  | 6.32770113793799  |
| C | -1.18819120536782 | -4.58695647721358 | 4.96956917212411  |
| C | 6.60440424648598  | 0.04792337786801  | 2.67101955930834  |
| C | 4.22147224393613  | 0.21706073186223  | 3.09348438699530  |
| H | -3.54299499408647 | 0.88898047873252  | 7.12546077700108  |
| H | -2.55331069337351 | 0.13001821507137  | 5.86067810679621  |
| H | -1.81825984178222 | 1.28744069344884  | 7.00260665052139  |
| H | -4.29523010710385 | 0.94389585035328  | 4.16696859297290  |
| H | -5.20555145693029 | 1.68861783869109  | 5.50238686872712  |
| H | -4.74110608724968 | 2.66104434684880  | 4.08943426288941  |
| H | -3.62119832947472 | 4.34213775470235  | 5.70219066701206  |
| H | -4.10062201662250 | 3.31724162472013  | 7.077673444455985 |
| H | -2.39131007752403 | 3.77592783583715  | 6.85422317996516  |
| C | 0.26698596263932  | -4.68923593066452 | 4.47002200692031  |

|   |                   |                   |                   |
|---|-------------------|-------------------|-------------------|
| C | -1.81262455124624 | -5.98881091914724 | 4.95258282026580  |
| C | -1.18500856444565 | -4.07315514695827 | 6.42574156776966  |
| C | 6.37318658184797  | -1.08750343003471 | 1.89134418962905  |
| H | 7.61535394398746  | 0.42542715788453  | 2.80751968825659  |
| C | 4.00835430213353  | -0.90913935821794 | 2.30419072489600  |
| H | 3.37526388528866  | 0.70091871667476  | 3.57827175263556  |
| H | 0.76883768860536  | -3.71371965830641 | 4.44115146957419  |
| H | 0.84470595858734  | -5.34965752998835 | 5.13410740881336  |
| H | 0.31021045196107  | -5.10953480612874 | 3.45629462460199  |
| H | -1.21213595062031 | -6.66549298469634 | 5.57725655892250  |
| H | -2.83702088411832 | -5.98713034239107 | 5.35327716454350  |
| H | -1.83924269255711 | -6.41273423155494 | 3.93747002593087  |
| H | -0.63448776288503 | -4.77247214384656 | 7.07311944052441  |
| H | -0.70186439792694 | -3.08943188843566 | 6.49974886524358  |
| H | -2.21071423942023 | -3.97822176208023 | 6.81107995897197  |
| C | 5.07693675710411  | -1.56734459179142 | 1.69752699260475  |
| C | 7.52590587369435  | -1.86189829668013 | 1.30749678700687  |
| H | 4.89297830675519  | -2.46091099208893 | 1.10153375392355  |
| F | 8.69194403971814  | -1.16772497920586 | 1.33052922629433  |
| F | 7.29692489853070  | -2.22199743007178 | 0.00904556872216  |
| F | 7.74045279997184  | -3.02298822560303 | 1.99250758072090  |
| C | -5.24825454652019 | -2.15077514397471 | -1.40646496217257 |
| C | -4.33869770719839 | -1.35594256615765 | -2.10098054377797 |
| H | -4.89855161507351 | -3.00886769062394 | -0.83426552329714 |
| C | -6.60803492157796 | -1.84621318005666 | -1.47933943608299 |
| C | -4.76128082918388 | -0.25754968255823 | -2.84400046691967 |
| C | -7.05266312756321 | -0.74434270038303 | -2.21215654834594 |
| C | -7.59084729141951 | -2.77766097914992 | -0.81609262082300 |
| C | -6.12316526057546 | 0.04919056843948  | -2.88423090400343 |
| H | -4.03224576390365 | 0.34051297166044  | -3.38860097701106 |
| H | -8.11240560862714 | -0.50242402834124 | -2.25157950696184 |
| F | -7.20839528909293 | -3.10478443181573 | 0.45313628188380  |
| F | -7.68783163781307 | -3.95437325152616 | -1.50153885664263 |
| F | -8.84014516256112 | -2.25754627476256 | -0.74149382707924 |
| C | -6.56779792656053 | 1.22733689981854  | -3.71493456919643 |
| F | -7.87157887623672 | 1.54598261031786  | -3.51126645161816 |
| F | -5.82850411487119 | 2.33920427531625  | -3.44545685449446 |
| F | -6.42024734477160 | 0.97477656329764  | -5.04689839541259 |
| H | -1.60773692563423 | -4.07827910073834 | -1.74179403200849 |
| H | -1.74207741907292 | -6.71102370147614 | -0.70760824458253 |
| H | -0.29775515197670 | -6.28555755521214 | 1.14367715326480  |
| H | -0.67699241276489 | -3.26781418205363 | 0.66152520529030  |

228

B-E

|   |                  |                  |                  |
|---|------------------|------------------|------------------|
| C | 0.87119387398588 | 4.45044892655031 | 3.44670894413367 |
| C | 0.77435116033057 | 3.60759833456671 | 4.70126718559296 |
| C | 1.88172104910211 | 2.53842672841513 | 4.79477232892443 |
| C | 1.74841561037046 | 1.42939616742226 | 3.75781281802632 |
| O | 2.13763109243222 | 1.87395433580411 | 2.43027898911474 |
| H | 0.83330411788380 | 4.25376212729785 | 5.59038262959448 |
| H | 1.83073690300584 | 2.06680026490340 | 5.78993158688345 |
| H | 0.71475269403040 | 1.05459190867251 | 3.73321282961521 |
| C | 1.91698696465419 | 5.50379081009392 | 3.39128911123529 |
| C | 2.21392839775930 | 6.30044357824817 | 4.51093738162110 |
| C | 2.63031825685330 | 5.74310844447771 | 2.20343279452173 |
| C | 3.16559691725358 | 7.31748288883937 | 4.43605531353772 |
| H | 1.67526601339683 | 6.14394571120976 | 5.44649727972439 |
| C | 3.58581814038818 | 6.75448179579529 | 2.12949875183753 |

|   |                   |                   |                   |
|---|-------------------|-------------------|-------------------|
| H | 2.45017665751579  | 5.10522789037240  | 1.33909399741391  |
| C | 3.85608562813170  | 7.55049674774473  | 3.24492802084062  |
| H | 3.36795475412762  | 7.93250871012263  | 5.31467744676309  |
| H | 4.12836562986503  | 6.91385529302296  | 1.19585015216749  |
| H | 4.60567008404324  | 8.34145607256751  | 3.18966210410738  |
| C | 0.05577394624501  | 4.21813909709190  | 2.39643261726492  |
| H | -0.69959809483337 | 3.43111021536783  | 2.43840624403964  |
| H | 0.11093203905802  | 4.80800433336117  | 1.48146052860615  |
| H | 1.16866215340689  | -7.90063053834545 | 0.59776488023730  |
| C | 0.99227416075877  | -7.72543369400778 | 1.66833487834904  |
| C | 1.19068649701969  | -6.23978227696064 | 2.03669139748719  |
| H | 1.69392816163430  | -8.35441944948683 | 2.23727179168258  |
| H | -0.03145798777673 | -8.05254829793193 | 1.90086765222494  |
| C | 0.19527557406578  | -5.40206201799782 | 1.22629570532936  |
| C | 2.63389809566527  | -5.82395727519907 | 1.69092027321634  |
| C | 0.99266734284277  | -6.08212813877168 | 3.55082473794334  |
| C | 3.88700125403193  | -1.52312312724296 | 3.98514869766401  |
| C | 0.25160196728909  | -5.40799818422874 | -0.17795500327222 |
| C | -0.81624954097323 | -4.63497339766113 | 1.81936278832477  |
| H | 2.83848648840042  | -5.93193148628725 | 0.61758657299090  |
| H | 2.82088746858566  | -4.77904814987980 | 1.97103631015235  |
| H | 3.34977114639994  | -6.45593225066102 | 2.23828304443550  |
| H | 1.14432586494713  | -5.04285469036427 | 3.87552583441042  |
| H | -0.01000249167492 | -6.40479725230304 | 3.86718139603286  |
| H | 1.72561795905600  | -6.70678928778070 | 4.08181819198719  |
| C | 3.15286744015704  | -1.97630023588863 | 2.87501975384049  |
| C | 3.30080537786163  | -1.40355469795948 | 5.24597392758732  |
| H | 4.93100714737821  | -1.23214693817931 | 3.86336897239572  |
| C | -0.67505228358576 | -4.71192156777851 | -0.94567805145366 |
| H | 1.03656612328333  | -5.96554860923900 | -0.69141304578652 |
| C | -1.74629943746128 | -3.92913097061363 | 1.05560470675267  |
| H | -0.89757096659589 | -4.58195314847155 | 2.90454561617253  |
| C | 3.82244166407871  | -2.20607906448000 | 1.57210615563591  |
| C | 1.79612828368961  | -2.28987119921211 | 3.09113102296324  |
| C | 1.94813355269589  | -1.70714862072719 | 5.45774287830099  |
| H | 3.91537161191445  | -1.03886460707353 | 6.06876299809124  |
| C | -1.70712066203045 | -3.97050906411819 | -0.34509450536151 |
| H | -0.58442224876615 | -4.72273351005680 | -2.03290219730393 |
| H | -2.51340817662357 | -3.34865839408286 | 1.56472790900137  |
| C | 3.12820479731387  | -2.20894584128441 | 0.32460252276850  |
| C | 5.16999872858663  | -2.53689250608878 | 1.52019232488676  |
| C | 1.21685372706319  | -2.14934613736020 | 4.34551157004529  |
| H | 1.17615489847839  | -2.66424535770033 | 2.28129682408767  |
| C | 1.25386508446894  | -1.57316373153436 | 6.81445576374658  |
| C | -2.72166848590612 | -3.30749002382862 | -1.19402101224473 |
| O | 1.78062896710168  | -1.82735764717478 | 0.33615869511297  |
| C | 3.68020437223322  | -2.66357239243091 | -0.86797990136866 |
| H | 5.73945851481232  | -2.59237946918399 | 2.44859753953960  |
| C | 5.83896241777014  | -2.82900431993776 | 0.31070589194444  |
| H | 0.15458146543778  | -2.37603312297542 | 4.44186395129378  |
| C | 0.77197336290242  | -2.96967006309004 | 7.26150889135608  |
| C | 0.03608688597528  | -0.63515726992746 | 6.67869041828451  |
| C | 2.18831942706268  | -1.00954865140327 | 7.89308252811433  |
| C | -3.20577216724948 | -1.99613229676360 | -0.93222254491181 |
| C | -3.23260964529174 | -3.94393161634900 | -2.31379558426418 |
| P | 1.23691623793243  | -0.59813311329702 | -0.55102881311240 |
| C | 5.09025291721810  | -2.90572163274319 | -0.90902261753223 |
| C | 2.80962664232132  | -2.96009645331395 | -2.03789552814206 |

|   |                   |                   |                   |
|---|-------------------|-------------------|-------------------|
| C | 7.23744363188281  | -3.07539165922879 | 0.27796304626942  |
| H | 0.26210547709978  | -2.90128290588184 | 8.23429408567645  |
| H | 0.06578996843176  | -3.40010994704810 | 6.53821705669718  |
| H | 1.61934686326528  | -3.66339077827277 | 7.36298187849042  |
| H | -0.49314622073999 | -0.56683605472079 | 7.64102997158541  |
| H | 0.34813183863452  | 0.37783098946129  | 6.38885149210880  |
| H | -0.67707612691555 | -0.98629339094673 | 5.92133841388599  |
| H | 3.05658036241540  | -1.66252767942313 | 8.06562932873778  |
| H | 2.55678922455137  | -0.00727506229999 | 7.62803758451259  |
| H | 1.64283013202819  | -0.92308309158201 | 8.84363766175488  |
| O | -2.70348680447220 | -1.32487288619688 | 0.18704020265831  |
| C | -4.13706280082787 | -1.33358927415230 | -1.71750274951840 |
| H | -2.90762785691265 | -4.96170610689319 | -2.53893460644415 |
| C | -4.16130261278338 | -3.32107719611966 | -3.18026772923487 |
| O | 2.01322182085265  | -0.72053120803106 | -1.94790566916246 |
| N | -0.29089257444633 | -0.80475245316481 | -0.65676068604985 |
| N | 1.82878643640269  | 0.84031562034234  | 0.02308706370895  |
| C | 5.78031106487380  | -3.18542137970810 | -2.11607863988911 |
| C | 2.73874793197002  | -4.28207343363479 | -2.59318992689363 |
| C | 1.96539266682940  | -1.99289314483642 | -2.55288957381979 |
| H | 7.79784258338677  | -3.02159180367456 | 1.21295815929889  |
| C | 7.87865348501551  | -3.35059763644335 | -0.91032280668866 |
| P | -1.61102481715484 | -0.15431863898723 | -0.06494134038845 |
| C | -4.52533374961842 | 0.06467476897753  | -1.39000703827492 |
| C | -4.62516091409569 | -1.99320585479520 | -2.89331050538908 |
| C | -4.62016164428322 | -3.97745994719034 | -4.35354437053634 |
| S | 2.64378048807305  | 2.01692281845982  | -0.85983007137971 |
| H | 1.81586791948576  | 1.09237472043991  | 1.07367396575633  |
| C | 7.14350633670143  | -3.39561419184761 | -2.11731956746422 |
| H | 5.22201396918578  | -3.21235108883327 | -3.05130022850123 |
| C | 3.47802113850844  | -5.38067101899386 | -2.08256312246371 |
| C | 1.82922660106792  | -4.52033438036457 | -3.67809318647264 |
| C | 1.04846932863221  | -2.19448983953147 | -3.61911795360029 |
| H | 8.95525092600076  | -3.52616943388327 | -0.92424094337442 |
| O | -2.20489203567892 | 0.63672610465563  | -1.34703740098441 |
| N | -1.53147136906582 | 0.77618390274846  | 1.21631827430278  |
| C | -3.54242072189486 | 1.03937869705986  | -1.27282739829878 |
| C | -5.88988772622947 | 0.45306789733454  | -1.19919659045650 |
| C | -5.50276547431603 | -1.37348225815488 | -3.82135231618739 |
| H | -4.26551316845256 | -4.99094146163771 | -4.55331218916268 |
| C | -5.47918468734904 | -3.34999192473821 | -5.22902682637090 |
| O | 2.63514549786335  | 3.18960589088800  | -0.00735313662862 |
| O | 2.14234274416519  | 2.07273980733524  | -2.21616188077058 |
| H | 7.65988593499061  | -3.58608133114670 | -3.05882886143818 |
| H | 4.15168208339743  | -5.22499520179169 | -1.24233929347922 |
| C | 3.34490725874154  | -6.64232614117456 | -2.62540879649710 |
| C | 1.72910106010532  | -5.82801477213248 | -4.22390472744941 |
| C | 1.02136653916016  | -3.46690515523854 | -4.16684721918311 |
| C | 0.14380678376846  | -1.13373030333234 | -4.11178203852467 |
| S | -2.06436442911022 | 0.39437220310358  | 2.68526206062868  |
| C | -3.81040015976323 | 2.42817938866828  | -1.11726301299686 |
| C | -6.19170590901969 | 1.84414660666214  | -1.02016553798396 |
| C | -6.95094824895455 | -0.48587686651029 | -1.13251276165746 |
| C | -5.91643813540548 | -2.03288747147402 | -4.96079869096392 |
| H | -5.84642808464119 | -0.35853210454909 | -3.63000589096637 |
| H | -5.81752133378925 | -3.86299777125543 | -6.13032906896128 |
| H | 3.91726631636970  | -7.47163039343221 | -2.20715889808500 |
| C | 2.46954117253504  | -6.87033697630436 | -3.71112367562258 |

|   |                   |                   |                   |
|---|-------------------|-------------------|-------------------|
| H | 1.03864536689257  | -5.99203262426765 | -5.05386428595528 |
| H | 0.34732823981640  | -3.66663600881639 | -5.00213819941648 |
| C | -1.19662032011656 | -1.43878125625632 | -4.40350942480876 |
| C | 0.57829047919588  | 0.17902509877046  | -4.33543503671862 |
| O | -1.76876271622494 | -0.98596540205907 | 3.07202598537207  |
| O | -1.64894064898190 | 1.46783861667116  | 3.58587205404938  |
| C | -5.14434387489548 | 2.79379180464891  | -1.02099121537765 |
| C | -2.74360542310016 | 3.45387069954886  | -1.10444714659399 |
| C | -7.54301182105045 | 2.23842059330398  | -0.83336506338606 |
| C | -8.25070057982471 | -0.07137623810444 | -0.92661274070317 |
| H | -6.72503970206931 | -1.54761644609383 | -1.22417858434653 |
| H | -6.58455957546795 | -1.53025231832885 | -5.66180412073619 |
| H | 2.37641219698086  | -7.87136715374815 | -4.13434800543469 |
| C | -2.05375099988521 | -0.47424386241141 | -4.91998901881994 |
| H | -1.58015634684811 | -2.43846641938893 | -4.19351534481608 |
| C | -0.28858185567559 | 1.14172451423489  | -4.85246601519801 |
| H | 1.60484516251350  | 0.46141787878176  | -4.11018067840824 |
| H | -5.40034453068197 | 3.85082120705660  | -0.93616562668286 |
| C | -2.87407519731384 | 4.59865267367147  | -0.30239584103632 |
| C | -1.6107977597212  | 3.37091928038419  | -1.93282568765014 |
| H | -7.76203452276240 | 3.29956921252805  | -0.70049677635395 |
| C | -8.55349503321514 | 1.30238126091760  | -0.78704271915168 |
| H | -9.04868378048140 | -0.81180972817116 | -0.85775141648870 |
| F | 8.02734619924942  | -0.43743549910677 | -3.29740793764603 |
| C | -1.62006596220926 | 0.83969687523289  | -5.16695563627334 |
| H | -3.08776114909841 | -0.75602281480562 | -5.12379739451927 |
| H | 0.09824130420707  | 2.14749162113321  | -5.01321532948814 |
| C | -1.93774892818477 | 5.62956101366523  | -0.35597313130736 |
| H | -3.71638606762871 | 4.67911723260392  | 0.38703689974348  |
| C | -0.68099703461120 | 4.40531582081422  | -1.98032745427802 |
| H | -1.45354117303386 | 2.49590676626395  | -2.56117786419379 |
| H | -9.58563848860976 | 1.61788337813745  | -0.62800442404978 |
| C | 6.83826566784533  | 0.19915340735605  | -3.43772103258866 |
| C | -2.58003170253289 | 1.86030544424936  | -5.78778254500023 |
| C | -0.82422228842395 | 5.56878086928634  | -1.20785275934633 |
| H | -2.08320541006924 | 6.49356954306104  | 0.29201366754475  |
| H | 0.17804474620923  | 4.28860612851049  | -2.64107011091075 |
| F | 6.03056724603364  | -0.59717955644897 | -4.19120169677407 |
| C | 6.20455867907320  | 0.54376858788960  | -2.11219409573763 |
| F | 7.06973047065513  | 1.32481676109092  | -4.17241896846381 |
| C | -2.97783839707556 | 1.36146550882362  | -7.19318612993400 |
| C | -1.94627879344386 | 3.25204398969043  | -5.92274892769874 |
| C | -3.84886656764291 | 1.98873956133109  | -4.92253676357553 |
| C | 0.15186557484358  | 6.74129929154081  | -1.35682703171321 |
| C | 6.92707325344677  | 0.44678233890337  | -0.92519484765809 |
| C | 4.88696245470546  | 1.01360570579810  | -2.10663629416041 |
| H | -2.09283408312760 | 1.25923545056864  | -7.83787454139046 |
| H | -3.47627172232706 | 0.38315905644094  | -7.14361124566055 |
| H | -3.67039996299112 | 2.07402833069660  | -7.66662590178618 |
| H | -2.67566784206504 | 3.94353601941646  | -6.36872370784127 |
| H | -1.65432542215286 | 3.66266799651977  | -4.94523883349723 |
| H | -1.06077258125232 | 3.23726902819523  | -6.57487425368677 |
| H | -4.55442767484985 | 2.69024485145523  | -5.39281417506588 |
| H | -4.35866446079685 | 1.02356509779050  | -4.80658646605205 |
| H | -3.61034061574467 | 2.36858559804159  | -3.92045392050849 |
| C | -0.31487316630994 | 7.58560746714664  | -2.56327769780103 |
| C | 1.58566563526804  | 6.24621004638663  | -1.62176353890787 |
| C | 0.17384436973373  | 7.63761165793935  | -0.10717960844508 |

|   |                   |                   |                   |
|---|-------------------|-------------------|-------------------|
| C | 6.32948649639365  | 0.83259876244295  | 0.28035191250346  |
| H | 7.94584353550821  | 0.06341546638995  | -0.93423197652707 |
| C | 4.31752369538687  | 1.39038110377983  | -0.89702899299258 |
| H | 4.30759215079420  | 1.08890734166252  | -3.02623827223202 |
| H | -1.33031774363959 | 7.97497029404039  | -2.40045606246183 |
| H | 0.36285934891505  | 8.43961501405318  | -2.71743685312966 |
| H | -0.32577461414175 | 6.98281423096143  | -3.48287406215237 |
| H | 2.27267500576509  | 7.10491507455205  | -1.64759425334495 |
| H | 1.92403473761931  | 5.55405309914134  | -0.84016699626383 |
| H | 1.67330855706400  | 5.72847062955238  | -2.58665754453833 |
| H | 0.44990749559099  | 7.07486674185189  | 0.79564652293225  |
| H | 0.91870674990883  | 8.43529514385501  | -0.24139403461360 |
| H | -0.79534206509017 | 8.12417808786227  | 0.07028362073466  |
| C | 5.02174724390081  | 1.31085475313562  | 0.30646632921710  |
| C | 7.13397118870000  | 0.80085867998521  | 1.55690770954343  |
| H | 4.54775956568456  | 1.61489770605731  | 1.24177481524144  |
| F | 8.05963884618941  | -0.19594000949911 | 1.55599908241291  |
| F | 6.34778338338526  | 0.62377657836097  | 2.65175037691484  |
| F | 7.81192976016784  | 1.96851098501245  | 1.73929804202926  |
| C | -4.45470200555159 | 1.78131066912032  | 2.61440272342924  |
| C | -3.85821619762493 | 0.52142147066586  | 2.58412410662079  |
| H | -3.83295462664593 | 2.67355354538826  | 2.68970670988822  |
| C | -5.84680053507804 | 1.87522574543425  | 2.56946402229337  |
| C | -4.63031527340890 | -0.63386975802180 | 2.51140611533960  |
| C | -6.63747298776590 | 0.72714107603781  | 2.48062076686674  |
| C | -6.48741658497098 | 3.23417559601036  | 2.68855629194150  |
| C | -6.02154244084400 | -0.52346534522047 | 2.45028443048705  |
| H | -4.14024670354834 | -1.60613407608695 | 2.50933156638703  |
| H | -7.72095193849841 | 0.80838330138544  | 2.42787341389893  |
| F | -6.39634416773993 | 3.71478586981282  | 3.96168410047377  |
| F | -7.80569151447605 | 3.22269335599451  | 2.36268971510721  |
| F | -5.88259002576021 | 4.15809966899770  | 1.88483209035505  |
| C | -6.83830215889297 | -1.78860315927089 | 2.39392872339727  |
| F | -6.76547898441272 | -2.47908745438775 | 3.56897378105098  |
| F | -8.15358613731980 | -1.55369735848910 | 2.15206717809180  |
| F | -6.39108892565520 | -2.63468975775104 | 1.42169674710629  |
| H | 1.66436869061040  | 2.72361201680004  | 2.26607714259752  |
| H | 2.42086622413232  | 0.59832185804270  | 3.99030438557102  |
| H | 2.87910362219813  | 3.00124562628049  | 4.71414274093255  |
| H | -0.20310124450467 | 3.10687983596013  | 4.72501274312807  |

228

B-TS1

|   |                  |                  |                  |
|---|------------------|------------------|------------------|
| C | 0.84254749508035 | 4.36555222593391 | 3.25254646130008 |
| C | 0.53106619723980 | 3.67611207632331 | 4.52485504489376 |
| C | 1.60171545840620 | 2.56873348912594 | 4.82364621953247 |
| C | 1.67199390295123 | 1.41625074099544 | 3.82840877771208 |
| O | 2.44606953121083 | 1.83664896346008 | 2.68973527664897 |
| H | 0.55233987116445 | 4.37599949233569 | 5.37099951247415 |
| H | 1.32931522726755 | 2.16513345252105 | 5.80983206942439 |
| H | 0.65921596713428 | 1.10643268222033 | 3.52759683396981 |
| C | 1.75274991363119 | 5.48839933387871 | 3.24161523670107 |
| C | 1.86359762442179 | 6.36617124324198 | 4.34611395956284 |
| C | 2.58317583102548 | 5.69945388485830 | 2.11376340272757 |
| C | 2.74814511374173 | 7.43579686252865 | 4.30754760328000 |
| H | 1.21439200235315 | 6.23816464558175 | 5.21175534875957 |
| C | 3.49895047254352 | 6.74273894447558 | 2.10643237146303 |
| H | 2.55299096468561 | 4.99415466301762 | 1.28335099969593 |
| C | 3.57395734224810 | 7.62030229338381 | 3.19272028221249 |

|   |                   |                   |                   |
|---|-------------------|-------------------|-------------------|
| H | 2.80178988961899  | 8.12730940441441  | 5.14891314115349  |
| H | 4.15511757158625  | 6.87466617480517  | 1.24561523615276  |
| H | 4.28060935553735  | 8.45158186527208  | 3.17356460371138  |
| C | 0.38759807403213  | 3.76622477706698  | 2.03345269981893  |
| H | -0.50665040768605 | 3.13909632579187  | 2.13748791552330  |
| H | 0.40524557967166  | 4.38202746155696  | 1.13165715499729  |
| H | 1.19226050054971  | -7.86461103346943 | 0.67756303272349  |
| C | 1.00021617460326  | -7.70023078953147 | 1.74706555384818  |
| C | 1.19806994280361  | -6.21923195928584 | 2.13411903042938  |
| H | 1.69135456012345  | -8.33759107853600 | 2.31968383846121  |
| H | -0.02807850501608 | -8.02634741518937 | 1.96056995190846  |
| C | 0.21717273080833  | -5.36908699269126 | 1.31893859120230  |
| C | 2.64743057478267  | -5.80390260988306 | 1.81302068682831  |
| C | 0.97869233530950  | -6.07802927260382 | 3.64687805605996  |
| C | 3.90940530088653  | -1.50141311746113 | 3.98744807521966  |
| C | 0.28935720638003  | -5.37064368768662 | -0.08410130289965 |
| C | -0.79259821942546 | -4.59298412900011 | 1.90379214682989  |
| H | 2.86522221210388  | -5.89373592434374 | 0.74048871410077  |
| H | 2.83476395385298  | -4.76461486486054 | 2.11267831147666  |
| H | 3.35385595321608  | -6.44829403765544 | 2.35834491483863  |
| H | 1.13161051569968  | -5.04336189400624 | 3.98518503433022  |
| H | -0.03065193634165 | -6.39838430028597 | 3.94435289145806  |
| H | 1.70036674326681  | -6.71279453094692 | 4.18149795438728  |
| C | 3.17511498285571  | -1.95705033756526 | 2.87909464440793  |
| C | 3.33679661854416  | -1.42520938457170 | 5.25839712052671  |
| H | 4.94591823030966  | -1.18704391540496 | 3.85754549555032  |
| C | -0.62269670721300 | -4.66500216340404 | -0.85965635191526 |
| H | 1.07579823956629  | -5.93175640873277 | -0.59104334036902 |
| C | -1.70666982552121 | -3.87456033384931 | 1.13181371912101  |
| H | -0.88496709179956 | -4.54380082152485 | 2.98842895166572  |
| C | 3.83969262198352  | -2.19059931965450 | 1.57395400734394  |
| C | 1.82469307579567  | -2.29217083438619 | 3.10111388835469  |
| C | 1.99624594793508  | -1.77290322900536 | 5.48100578056003  |
| H | 3.95411649774389  | -1.06786716478244 | 6.08260270981625  |
| C | -1.65443731091811 | -3.91668399565703 | -0.26829557307485 |
| H | -0.52076815000405 | -4.67311547413291 | -1.94572967658208 |
| H | -2.47523722918104 | -3.28792893189557 | 1.63240222583430  |
| C | 3.13341191048477  | -2.19812548270901 | 0.33282629317798  |
| C | 5.18266904457799  | -2.53502558390563 | 1.52138876169612  |
| C | 1.25765157527942  | -2.19324711194639 | 4.36526162188445  |
| H | 1.20409346364628  | -2.65380317335160 | 2.28593689884955  |
| C | 1.31990539384089  | -1.70151435848495 | 6.85199241799712  |
| C | -2.66326206716877 | -3.26123427946702 | -1.12949628125070 |
| O | 1.80034074362628  | -1.79746216083423 | 0.34431688191694  |
| C | 3.67653507495097  | -2.67303269786263 | -0.85652974202081 |
| H | 5.75739738453800  | -2.58441653514042 | 2.44692857186349  |
| C | 5.84161729999141  | -2.84665908966949 | 0.31078341895264  |
| H | 0.20108375080173  | -2.44358686929381 | 4.46951036287970  |
| C | 0.85278214095676  | -3.11802799639127 | 7.24856104029114  |
| C | 0.09421133671673  | -0.76762557816812 | 6.77312029957431  |
| C | 2.26472936125144  | -1.17711637350331 | 7.94126579941829  |
| C | -3.14631124507568 | -1.94481752587836 | -0.89154009265116 |
| C | -3.17280455927926 | -3.92064740575423 | -2.23645940033922 |
| P | 1.32026169282907  | -0.49844148643278 | -0.50664917433367 |
| C | 5.08348255425423  | -2.93128521200146 | -0.90291751948641 |
| C | 2.79170287798774  | -2.96151257677257 | -2.01736073188610 |
| C | 7.23812310098801  | -3.10101309208767 | 0.27166988376298  |
| H | 0.35761715290556  | -3.09429925017891 | 8.23116151785627  |

|   |                   |                   |                   |
|---|-------------------|-------------------|-------------------|
| H | 0.13909415587406  | -3.52406963922400 | 6.51874468635921  |
| H | 1.70630362857164  | -3.80890532699767 | 7.30746677509722  |
| H | -0.43049563270632 | -0.75045774999702 | 7.74034882902518  |
| H | 0.40069151667180  | 0.26089997775924  | 6.53406869908208  |
| H | -0.61988794218508 | -1.08230601139062 | 6.00063182522071  |
| H | 3.14165646993721  | -1.82836879469091 | 8.07019018479222  |
| H | 2.62093165520954  | -0.16076943367199 | 7.71546015938242  |
| H | 1.73349337895095  | -1.13866785310244 | 8.90319083932033  |
| O | -2.64508343021876 | -1.25334950583361 | 0.21376911334012  |
| C | -4.08193816883601 | -1.30293525949953 | -1.69095236066332 |
| H | -2.84585105313192 | -4.94228992757628 | -2.43999673379859 |
| C | -4.10037312330218 | -3.31703409328987 | -3.11679250213559 |
| O | 2.03829619577083  | -0.71146888447774 | -1.94296259471209 |
| N | -0.22546310763056 | -0.70593830111797 | -0.61226565557776 |
| N | 1.93442489280610  | 0.85158106378650  | 0.11601812907044  |
| C | 5.76451559138590  | -3.22997773452121 | -2.11061718752988 |
| C | 2.69873709569998  | -4.28328092656919 | -2.56797302466290 |
| C | 1.95692350410555  | -1.97928122038744 | -2.52344953854746 |
| H | 7.80560203927562  | -3.03737233699607 | 1.20206087717608  |
| C | 7.87052605638240  | -3.39347752218318 | -0.91749317770876 |
| P | -1.55177339960644 | -0.07805308326260 | -0.05790760991444 |
| C | -4.48198770093182 | 0.09720099956740  | -1.38984189571586 |
| C | -4.56575001626061 | -1.98479951789957 | -2.85601634292123 |
| C | -4.55646937628374 | -3.99738291508362 | -4.27740676602253 |
| S | 2.68016377786361  | 1.98882562082541  | -0.75582122798029 |
| H | 2.26509986435855  | 1.23283304510335  | 1.92258458336710  |
| C | 7.12664776179720  | -3.44849440995475 | -2.11859084253206 |
| H | 5.19994945515494  | -3.26206576947677 | -3.04187758923099 |
| C | 3.42503866673319  | -5.39150578358634 | -2.05858796332338 |
| C | 1.78127444637073  | -4.51209627996958 | -3.64821548291941 |
| C | 1.03030355184271  | -2.17665967277049 | -3.58491288266732 |
| H | 8.94645127129871  | -3.57314143123948 | -0.93645162497593 |
| O | -2.16952837565687 | 0.68286096345060  | -1.35301936542422 |
| N | -1.55354208227732 | 0.89791898384828  | 1.20354371406172  |
| C | -3.50391092695047 | 1.07729198612789  | -1.27942016034976 |
| C | -5.85049052596393 | 0.48160513756337  | -1.22097986419648 |
| C | -5.43989965524637 | -1.38373463838444 | -3.79970250746033 |
| H | -4.19954969333884 | -5.01397751683904 | -4.45630141309388 |
| C | -5.41440954185833 | -3.38847882361329 | -5.16691312206923 |
| O | 2.81047208594556  | 3.17026758803714  | 0.09970444715269  |
| O | 2.13454547216467  | 2.17800866058695  | -2.09574185489000 |
| H | 7.63514834682077  | -3.65242623438151 | -3.06170377582390 |
| H | 4.10394480752750  | -5.24246514058888 | -1.22105569675965 |
| C | 3.27383365217963  | -6.65248841586198 | -2.59871935978715 |
| C | 1.66249534111407  | -5.81916850309473 | -4.19170700554809 |
| C | 0.98429885059358  | -3.44845613958124 | -4.13305207278164 |
| C | 0.13778459138535  | -1.10472146223375 | -4.07716818286803 |
| S | -2.11871310074629 | 0.56871759346455  | 2.66007841564659  |
| C | -3.78246819264702 | 2.46590522519107  | -1.13332836864046 |
| C | -6.16236069027525 | 1.87396829572105  | -1.07242096942585 |
| C | -6.90832667322303 | -0.46103220921060 | -1.15310059021238 |
| C | -5.85151749083356 | -2.06599540983433 | -4.92633743762077 |
| H | -5.78159615356082 | -0.36396449513200 | -3.63229138981332 |
| H | -5.75061621097456 | -3.91957024149059 | -6.05852729581940 |
| H | 3.83738625955623  | -7.48844275367779 | -2.18143166795226 |
| C | 2.39149902754798  | -6.87079444419980 | -3.68090084577777 |
| H | 0.96620594597671  | -5.97531258166106 | -5.01852472491191 |
| H | 0.30582675199994  | -3.64109575177109 | -4.96651989245565 |



|   |                   |                   |                   |
|---|-------------------|-------------------|-------------------|
| C | -1.19499031585187 | -1.40408506679769 | -4.40851101821137 |
| C | 0.57315022837059  | 0.21458679442879  | -4.26230233260596 |
| O | -1.77407834006988 | -0.76502557613867 | 3.15223473317578  |
| O | -1.78321973626991 | 1.71655768402437  | 3.51372616989005  |
| C | -5.11896174532399 | 2.82793577380109  | -1.06479785821463 |
| C | -2.71819799602181 | 3.49378002351205  | -1.09508627590544 |
| C | -7.51879005816559 | 2.26498220285623  | -0.91910591765622 |
| C | -8.21377726393249 | -0.04943694021682 | -0.97970709879701 |
| H | -6.67543136859588 | -1.52295113844835 | -1.22149416939290 |
| H | -6.51669450049108 | -1.57671868391898 | -5.63957986483227 |
| H | 2.28382911023865  | -7.87105260557184 | -4.10274075826466 |
| C | -2.04138120303721 | -0.43190305617384 | -4.92842485824745 |
| H | -1.58270473284880 | -2.40770171583074 | -4.22715724985582 |
| C | -0.28296030625309 | 1.18482662819719  | -4.78336673447869 |
| H | 1.58863743702128  | 0.50000021988039  | -3.99646594109347 |
| H | -5.38242461763157 | 3.88428607411668  | -0.99536427433416 |
| C | -2.88090473106879 | 4.64719445395925  | -0.30983724208227 |
| C | -1.54881924202335 | 3.40000148604934  | -1.86919597163857 |
| H | -7.74522675209944 | 3.32742809949699  | -0.81082323274088 |
| C | -8.52592607639925 | 1.32522075552335  | -0.87395525749141 |
| H | -9.00920229177655 | -0.79274454395475 | -0.91130629866366 |
| F | 7.80697899059933  | -0.54579279820956 | -3.66368312473886 |
| C | -1.60456549711468 | 0.88695637794540  | -5.13962926365266 |
| H | -3.06947527010536 | -0.71225874467440 | -5.16238289386380 |
| H | 0.10654171589269  | 2.19431520332224  | -4.91169776671431 |
| C | -1.94131005747180 | 5.67582089252612  | -0.33313046196079 |
| H | -3.75450866717779 | 4.73680226383142  | 0.33872349269710  |
| C | -0.61026538998847 | 4.42816513108959  | -1.88091727939805 |
| H | -1.36323748095329 | 2.51867958428714  | -2.47961285653348 |
| H | -9.56235393060765 | 1.63879874024905  | -0.74098037740620 |
| C | 6.60855514159227  | 0.09177801441419  | -3.69513546410745 |
| C | -2.55079844714145 | 1.91754567901632  | -5.76531429781978 |
| C | -0.78791301418942 | 5.60090378845919  | -1.13123872044892 |
| H | -2.12033974513941 | 6.55298322504776  | 0.28931485215013  |
| H | 0.28336085843240  | 4.29137695991691  | -2.48893471730088 |
| F | 5.73162343070042  | -0.72046987045448 | -4.34927585085544 |
| C | 6.11086654208103  | 0.46399111020965  | -2.32184598751587 |
| F | 6.76731654302064  | 1.19936344417770  | -4.47795089440614 |
| C | -2.91464336659049 | 1.44540497397985  | -7.18891214392460 |
| C | -1.91568671293539 | 3.31203093702814  | -5.86027771727719 |
| C | -3.84010918597458 | 2.02958669773759  | -4.92870737993878 |
| C | 0.19068164177926  | 6.77442314359203  | -1.24805336243898 |
| C | 6.93847331576714  | 0.35121610820002  | -1.20633479976198 |
| C | 4.81126756265265  | 0.96589740141879  | -2.19791467925371 |
| H | -2.01414397376658 | 1.35605442037455  | -7.81373424327467 |
| H | -3.41177464985494 | 0.46543057147597  | -7.16946321688394 |
| H | -3.59723098653413 | 2.16551367632898  | -7.66585473604795 |
| H | -2.63456582162145 | 4.01103531305642  | -6.31204842729673 |
| H | -1.64695218985770 | 3.70489886115139  | -4.86888363370974 |
| H | -1.01408394827541 | 3.30825588117074  | -6.49002748001138 |
| H | -4.53456948419681 | 2.74150360882338  | -5.40029280767522 |
| H | -4.35240802255719 | 1.06220792487389  | -4.84528402272653 |
| H | -3.62495538284880 | 2.38668093713918  | -3.91296479797560 |
| C | -0.30179295044769 | 7.68365875504372  | -2.39571844153270 |
| C | 1.61433398678946  | 6.28975806213023  | -1.57781685462463 |
| C | 0.24110100321088  | 7.60495824913656  | 0.04631802689822  |
| C | 6.45726778931793  | 0.74781135650175  | 0.04529516255273  |
| H | 7.94363287493329  | -0.05305792331773 | -1.30603639797916 |

|   |                   |                   |                   |
|---|-------------------|-------------------|-------------------|
| C | 4.35086595073572  | 1.34963582556455  | -0.94375294556244 |
| H | 4.15495733758332  | 1.06088062776423  | -3.06237364089420 |
| H | -1.31024010005031 | 8.06887659822250  | -2.18656284767540 |
| H | 0.37706995813829  | 8.54100729842211  | -2.52537362183849 |
| H | -0.34057405810130 | 7.12739304429858  | -3.34303678845096 |
| H | 2.31054800035192  | 7.14114099448271  | -1.54748443565096 |
| H | 1.96426337766896  | 5.52455192006058  | -0.87162004410695 |
| H | 1.67687065405715  | 5.85431687845817  | -2.58405075351460 |
| H | 0.51061354371240  | 6.98651099804401  | 0.91396541612451  |
| H | 0.99849693408230  | 8.39665203742213  | -0.05048446562961 |
| H | -0.71809193593823 | 8.09591205568989  | 0.26087289219515  |
| C | 5.16272567553059  | 1.24635459803293  | 0.18704121121765  |
| C | 7.35951381791792  | 0.70986984742983  | 1.25168939849109  |
| H | 4.78275212798432  | 1.55260804399677  | 1.16314371573927  |
| F | 8.41622712332457  | -0.12865818131547 | 1.08923356900387  |
| F | 6.69796361559221  | 0.31392788721079  | 2.37564915270181  |
| F | 7.87514692686958  | 1.94580769759637  | 1.52250470106292  |
| C | -4.56780220850351 | 1.84332943879399  | 2.53968098600684  |
| C | -3.91505178324776 | 0.61194635146262  | 2.52754493571879  |
| H | -3.98609096380794 | 2.76183251812129  | 2.61345227047760  |
| C | -5.96228209121883 | 1.87694977193619  | 2.48462870304833  |
| C | -4.63572045182724 | -0.57670968633939 | 2.45708094407848  |
| C | -6.70109817526271 | 0.69517564824942  | 2.39827882169742  |
| C | -6.65802354289136 | 3.20839403216073  | 2.59530715935439  |
| C | -6.02962199140168 | -0.52720521779290 | 2.38110138352911  |
| H | -4.10469712734851 | -1.52703569501608 | 2.46960525880629  |
| H | -7.78663888293693 | 0.72775647198139  | 2.33730422664460  |
| F | -6.58024609470062 | 3.70301407322159  | 3.86605988922172  |
| F | -7.97554944560813 | 3.14299372998015  | 2.27728801428695  |
| F | -6.09339508386758 | 4.15242001795315  | 1.78436130405486  |
| C | -6.79017521543354 | -1.82713429877250 | 2.32661152861002  |
| F | -6.70307742682482 | -2.50285649053634 | 3.50956692612146  |
| F | -8.11163993653193 | -1.65091722483343 | 2.06684757938151  |
| F | -6.29541645167762 | -2.66151281680840 | 1.36852705371793  |
| H | 1.24119001685831  | 2.99403642352447  | 1.93026954857246  |
| H | 2.15866248093267  | 0.55725446003356  | 4.30987289230058  |
| H | 2.59824980263872  | 3.02736201270252  | 4.91649721506183  |
| H | -0.44770214158385 | 3.18346584924476  | 4.45952786371196  |

228

B-P

|   |                  |                  |                  |
|---|------------------|------------------|------------------|
| C | 1.14714952298416 | 3.52490426761037 | 2.91777128196798 |
| C | 0.58410900255641 | 3.48482351001895 | 4.35566717542209 |
| C | 1.19684413641700 | 2.21765061804878 | 4.95072902515161 |
| C | 1.19111545915148 | 1.26771918624557 | 3.76082369316137 |
| O | 1.37404165861953 | 2.10984002709710 | 2.58993312471724 |
| H | 0.84284842378751 | 4.39574533779736 | 4.90990346124097 |
| H | 0.60665158812555 | 1.82575489901143 | 5.78797737271794 |
| H | 0.23480295884776 | 0.73574043779054 | 3.67296596256122 |
| C | 2.49433765427531 | 4.24292356605915 | 2.89330879150445 |
| C | 3.68781636760560 | 3.54058564933150 | 3.10945519624327 |
| C | 2.57006185633950 | 5.62842276468138 | 2.70016996039317 |
| C | 4.91947542425524 | 4.19702061446428 | 3.11930644042214 |
| H | 3.64948973665710 | 2.45974304764711 | 3.25147604778926 |
| C | 3.79987692702661 | 6.28857724312995 | 2.70377842986644 |
| H | 1.65928516044748 | 6.20438598310838 | 2.53172652634040 |
| C | 4.98192107569410 | 5.57584099900259 | 2.91070931164527 |
| H | 5.83585959192732 | 3.62674323536522 | 3.28409233238159 |
| H | 3.83288559272609 | 7.36666120037970 | 2.53638781330055 |

|   |                   |                   |                   |
|---|-------------------|-------------------|-------------------|
| H | 5.94413947059397  | 6.09007536068896  | 2.90789816438715  |
| C | 0.13166452821020  | 4.07785857932027  | 1.92573147729289  |
| H | -0.75692839245633 | 3.43518186258631  | 1.92802702330526  |
| H | -0.17978705894053 | 5.09121018651815  | 2.21367627879910  |
| H | 1.22782906539888  | -7.75840479297854 | 0.81846224550531  |
| C | 1.03908247549614  | -7.57512611796663 | 1.88542649927796  |
| C | 1.23032817452906  | -6.08629223093537 | 2.24570278934407  |
| H | 1.73540045894941  | -8.19837436494623 | 2.46703046809687  |
| H | 0.01338913294037  | -7.90242319505883 | 2.10879729380624  |
| C | 0.24143361333188  | -5.25706277141791 | 1.41816739336607  |
| C | 2.67693685790622  | -5.67066962898830 | 1.91097030507550  |
| C | 1.01442006516721  | -5.92336457432679 | 3.75662930054072  |
| C | 3.92620863458933  | -1.11876896883543 | 4.08087491377908  |
| C | 0.30654300673019  | -5.29150344134584 | 0.01507747592186  |
| C | -0.77258874867540 | -4.47497644268629 | 1.98797702838182  |
| H | 2.89021324252985  | -5.78413154261489 | 0.83978101325536  |
| H | 2.86234735646457  | -4.62392742202568 | 2.18651181830062  |
| H | 3.38840569590164  | -6.29943567827462 | 2.46764015447562  |
| H | 1.17122250829442  | -4.88551741033982 | 4.08179394225932  |
| H | 0.00500224088094  | -6.23724972033239 | 4.06004181281343  |
| H | 1.73560617660279  | -6.55213293477280 | 4.29874746126552  |
| C | 3.22323018730730  | -1.70983659760900 | 3.01760400316392  |
| C | 3.37235684543455  | -1.03947213697651 | 5.35937332196380  |
| H | 4.91717687025353  | -0.69676480784581 | 3.90465196076595  |
| C | -0.61996292988938 | -4.61859807365743 | -0.77148813082693 |
| H | 1.09605943877386  | -5.85660594405496 | -0.48257885601998 |
| C | -1.70236209521805 | -3.78829182115440 | 1.20411329915569  |
| H | -0.86133679334646 | -4.39946576727051 | 3.07158709468864  |
| C | 3.87164806571699  | -1.92165132467632 | 1.70352752901032  |
| C | 1.92905745538846  | -2.19204459558101 | 3.28832813335221  |
| C | 2.09141992444870  | -1.54026735510611 | 5.63718842381200  |
| H | 3.95600802324463  | -0.56388172866199 | 6.14701119021369  |
| C | -1.66090635434805 | -3.86981178733288 | -0.19504346596542 |
| H | -0.52537310331765 | -4.65626927108808 | -1.85739448403431 |
| H | -2.47059563902376 | -3.19498710169542 | 1.69701313029654  |
| C | 3.14206096256436  | -1.96264976218539 | 0.47886836201501  |
| C | 5.22544146236301  | -2.21336704209162 | 1.62876971337997  |
| C | 1.38628513259304  | -2.10645146313640 | 4.56425897784530  |
| H | 1.33621044035702  | -2.65416052278337 | 2.50192146123476  |
| C | 1.47920616308624  | -1.53608298123623 | 7.04060486910220  |
| C | -2.67790040407877 | -3.25663929791088 | -1.07915499154861 |
| O | 1.79043664854599  | -1.60432891901615 | 0.52761711543978  |
| C | 3.67404920407745  | -2.43035823977667 | -0.71689875802569 |
| H | 5.81568026265506  | -2.22925399318591 | 2.54609032798550  |
| C | 5.86870605984840  | -2.52189999100462 | 0.40906274344223  |
| H | 0.37646171339156  | -2.48898223335769 | 4.71640401214495  |
| C | 1.50706944434903  | -2.98670219817802 | 7.57064010761807  |
| C | 0.01838819631641  | -1.04601918084774 | 6.99928166418737  |
| C | 2.26242852867220  | -0.63990647944411 | 8.01061609685269  |
| C | -3.20068837636243 | -1.94894552496114 | -0.87976980785495 |
| C | -3.14730555937654 | -3.95024111867528 | -2.18400156365154 |
| P | 1.19730213753486  | -0.39617263830448 | -0.36343774579607 |
| C | 5.08801025341334  | -2.64927979363345 | -0.78664139874185 |
| C | 2.78393275888589  | -2.75800767453622 | -1.86192588297852 |
| C | 7.26994497751822  | -2.74329748847119 | 0.34647628980171  |
| H | 1.07160193389519  | -3.03135105194904 | 8.58043521251851  |
| H | 0.93009012380726  | -3.65792076993692 | 6.91865117391729  |
| H | 2.53787996567036  | -3.36654544281523 | 7.62065317688795  |

|   |                   |                   |                   |
|---|-------------------|-------------------|-------------------|
| H | -0.40892022148515 | -1.07133601209033 | 8.01256206392848  |
| H | -0.04683218143480 | -0.01459381740933 | 6.62817330006918  |
| H | -0.61610409570685 | -1.66862566688667 | 6.35553734841300  |
| H | 3.29072481229418  | -0.99786050512376 | 8.16411600179187  |
| H | 2.30670184311914  | 0.39932596981814  | 7.65281102049573  |
| H | 1.76575589109274  | -0.63757040429962 | 8.99133252069064  |
| O | -2.77096922649620 | -1.23668760327685 | 0.24287711431758  |
| C | -4.11346353702716 | -1.33638184516631 | -1.72735479481904 |
| H | -2.79726905850480 | -4.96990318325087 | -2.35605441333987 |
| C | -4.06096252669408 | -3.38457792737380 | -3.10271239202863 |
| O | 1.93562716086164  | -0.53384007232314 | -1.78110674776313 |
| N | -0.32396389146052 | -0.64099973592032 | -0.38538974649620 |
| N | 1.80055590637373  | 1.06784299793924  | 0.13787764447909  |
| C | 5.75239423383641  | -2.95494876275854 | -2.00192657569902 |
| C | 2.73142229801310  | -4.08689132277793 | -2.40245595980064 |
| C | 1.91421749629912  | -1.81147893660192 | -2.37368968731108 |
| H | 7.85364101122632  | -2.64991410828957 | 1.26404276324547  |
| C | 7.88471930372787  | -3.04758589531728 | -0.84883215821531 |
| P | -1.71946670595741 | -0.01908187058954 | 0.03249899107011  |
| C | -4.54147541596180 | 0.06483646931227  | -1.47319534156212 |
| C | -4.54786199150104 | -2.05131895069212 | -2.89199907921820 |
| C | -4.47708455174242 | -4.10241637752190 | -4.25606174368854 |
| S | 2.64353219648346  | 2.18637990588399  | -0.81060361156259 |
| H | 1.54579135029196  | 1.46758373036438  | 1.09986609688442  |
| C | 7.11841172225208  | -3.14479108614021 | -2.03276329043735 |
| H | 5.17196583837433  | -3.01995632006098 | -2.92135764697611 |
| C | 3.49021381829517  | -5.16784005239446 | -1.88280635053052 |
| C | 1.82190265225080  | -4.35153834087021 | -3.48064808174784 |
| C | 1.00426201108263  | -2.03764064554472 | -3.44129062843673 |
| H | 8.96342724940185  | -3.20597527295189 | -0.88580528699356 |
| O | -2.23395442484478 | 0.68011994731623  | -1.33505458814432 |
| N | -1.81072526944657 | 0.98059183270736  | 1.25482693427541  |
| C | -3.58211700224988 | 1.06111736677467  | -1.34331867831592 |
| C | -5.92077964912177 | 0.43464953669579  | -1.36628495763480 |
| C | -5.39667775029439 | -1.48452005625770 | -3.87937113177653 |
| H | -4.10639954470509 | -5.12029045230113 | -4.39524465159192 |
| C | -5.31432172013513 | -3.52750095091382 | -5.18662845938840 |
| O | 2.73469950408131  | 3.36436393977256  | 0.02415803031975  |
| O | 2.08812128140156  | 2.25007478476559  | -2.14692682290241 |
| H | 7.61215453109596  | -3.35902653743045 | -2.98124136779606 |
| H | 4.16249885797058  | -4.99275124244574 | -1.04522492050252 |
| C | 3.37596002231102  | -6.43709465040282 | -2.41202707748167 |
| C | 1.74101570662407  | -5.66619341292469 | -4.01276893116642 |
| C | 0.99851567860772  | -3.31503024231600 | -3.97855211615206 |
| C | 0.09876753732193  | -0.99329724862374 | -3.96589773419960 |
| S | -2.41680364214911 | 0.64455456857410  | 2.70659254201034  |
| C | -3.88202923907694 | 2.44730838504654  | -1.23388407160226 |
| C | -6.25492296712597 | 1.82493024052549  | -1.25181903972363 |
| C | -6.96910948951632 | -0.51999808342235 | -1.32361880840909 |
| C | -5.76850406125274 | -2.20227988823536 | -4.99757152682625 |
| H | -5.75294595413088 | -0.46410772711451 | -3.75070105035844 |
| H | -5.62091311833291 | -4.08725768767501 | -6.07130820825529 |
| H | 3.96265825688556  | -7.25274460179794 | -1.98681354245670 |
| C | 2.50060868735203  | -6.69073740798622 | -3.49219432283830 |
| H | 1.05020468712697  | -5.85004407789069 | -4.83825992987434 |
| H | 0.33147424847673  | -3.53081166571493 | -4.81537269912663 |
| C | -1.22809094937526 | -1.31843408570596 | -4.29438725663943 |
| C | 0.52806791112039  | 0.31845328955577  | -4.20604028622588 |

|   |                   |                   |                   |
|---|-------------------|-------------------|-------------------|
| O | -2.06225354394475 | -0.69348045710093 | 3.18336409140639  |
| O | -2.13340756263942 | 1.78796673714268  | 3.56894998684096  |
| C | -5.22446020020411 | 2.79229779826185  | -1.21901907501859 |
| C | -2.83480842137918 | 3.49098230403478  | -1.17798067063340 |
| C | -7.62086040974780 | 2.20138293985299  | -1.15847230837726 |
| C | -8.28531408792750 | -0.12203090602186 | -1.21025544507713 |
| H | -6.72206306482109 | -1.58011730989505 | -1.36231239723347 |
| H | -6.41639325376052 | -1.73975720314511 | -5.74375744938119 |
| H | 2.42261845261163  | -7.69749198136965 | -3.90475432327163 |
| C | -2.07501390234505 | -0.37543991070327 | -4.86441465091445 |
| H | -1.60852776244678 | -2.31745696267573 | -4.07592592319295 |
| C | -0.32899894171558 | 1.25949246512517  | -4.77635995544869 |
| H | 1.54341346448893  | 0.61718671569227  | -3.95390496956998 |
| H | -5.50080530758675 | 3.84669487522564  | -1.17308596549128 |
| C | -3.01600664497857 | 4.62826578223413  | -0.37740660261430 |
| C | -1.66964574190272 | 3.42845205003115  | -1.96293424840604 |
| H | -7.86359983990352 | 3.26233058645325  | -1.07479639895254 |
| C | -8.61773124206798 | 1.24999964428107  | -1.13989777326060 |
| H | -9.07372335448085 | -0.87415863046414 | -1.16032325612674 |
| F | 7.85707894852603  | -0.33253049953792 | -3.54013319981701 |
| C | -1.64565945266346 | 0.93595793445905  | -5.12969486951117 |
| H | -3.09750752514585 | -0.67390065069562 | -5.09866492950060 |
| H | 0.05413084706256  | 2.26472287732837  | -4.94902220991685 |
| C | -2.09213240722240 | 5.67282864943058  | -0.38638419459012 |
| H | -3.88860508870717 | 4.69170783911638  | 0.27569011869437  |
| C | -0.75667864113073 | 4.47763734671445  | -1.97010336429238 |
| H | -1.47683195516298 | 2.55778650305908  | -2.58753782972088 |
| H | -9.66223874054756 | 1.55265756846294  | -1.05314991941027 |
| C | 6.64457413273092  | 0.27135651120785  | -3.61096643070758 |
| C | -2.59255720627886 | 1.92946890147319  | -5.81149615696526 |
| C | -0.94676574734427 | 5.63254599631924  | -1.19350780391808 |
| H | -2.27665088154712 | 6.53145760449203  | 0.25855565457312  |
| H | 0.12901608589547  | 4.38259152747940  | -2.59980430180088 |
| F | 5.80555638337694  | -0.56636632452652 | -4.28081735077552 |
| C | 6.10032167052063  | 0.64199220743619  | -2.25303810865511 |
| F | 6.79386260851725  | 1.37904603825118  | -4.39238271137752 |
| C | -2.92521663180514 | 1.39377197875403  | -7.22027040968506 |
| C | -1.97122483854036 | 3.32629592897438  | -5.95153607218122 |
| C | -3.89792806773267 | 2.06023279044173  | -5.00257322142138 |
| C | 0.03955262341305  | 6.80165136258857  | -1.29097785877015 |
| C | 6.91605002364327  | 0.61662535484657  | -1.12302589636469 |
| C | 4.77469570215697  | 1.07739492488863  | -2.16420248648768 |
| H | -2.01314801399267 | 1.28983130024746  | -7.82576811665154 |
| H | -3.41176739906444 | 0.40959063465302  | -7.16832650713791 |
| H | -3.60731385217068 | 2.08534695441082  | -7.73793063129771 |
| H | -2.69080569308728 | 3.99865802812315  | -6.44060724058643 |
| H | -1.72251006617705 | 3.76094852388893  | -4.97242029536625 |
| H | -1.06081894914283 | 3.30934545955648  | -6.56832986840351 |
| H | -4.59051698862529 | 2.74381281269601  | -5.51641475285381 |
| H | -4.40291504845595 | 1.09203945280098  | -4.88836241339701 |
| H | -3.70610554636033 | 2.46226034960628  | -3.99922262278432 |
| C | -0.14828194079049 | 7.46521095820725  | -2.67274555613178 |
| C | 1.49354466895137  | 6.30911082182104  | -1.16393002253630 |
| C | -0.20464346257691 | 7.85780171959646  | -0.20322550647062 |
| C | 6.40177103611123  | 1.03869932464675  | 0.10707665754816  |
| H | 7.94325789325752  | 0.26494595280039  | -1.19683382808667 |
| C | 4.28874776037010  | 1.49557147912839  | -0.93104161202225 |
| H | 4.12843700251790  | 1.10847646482547  | -3.04057548054151 |

|     |                   |                   |                   |
|-----|-------------------|-------------------|-------------------|
| H   | -1.17682853067361 | 7.83502673083040  | -2.79459906099513 |
| H   | 0.54202699999086  | 8.31542245996068  | -2.78513487029726 |
| H   | 0.05307858780863  | 6.75102476369335  | -3.48370029649881 |
| H   | 2.18283966308463  | 7.16080663840355  | -1.26698457505687 |
| H   | 1.67859835098836  | 5.83697139182107  | -0.19067626099680 |
| H   | 1.75288249005059  | 5.57628334025179  | -1.93912426174584 |
| H   | -0.12688762491409 | 7.42340161620196  | 0.80457836127838  |
| H   | 0.55079156919440  | 8.65226873372470  | -0.28705975241798 |
| H   | -1.19305605431822 | 8.32996081228267  | -0.29936469112913 |
| C   | 5.08734861360147  | 1.48842612769570  | 0.21222393414802  |
| C   | 7.29215555572156  | 1.09287065096308  | 1.32357173638216  |
| H   | 4.69074927730626  | 1.85455799247198  | 1.15963709336837  |
| F   | 8.33920981600061  | 0.23266756735858  | 1.23869108640543  |
| F   | 6.61048758768925  | 0.79181809525738  | 2.46547799486280  |
| F   | 7.81473975740991  | 2.33952312989121  | 1.49860051939601  |
| C   | -4.87467362176296 | 1.87340436032706  | 2.45181940406594  |
| C   | -4.20355078336855 | 0.65205357796087  | 2.48199988631230  |
| H   | -4.31060161236992 | 2.80089866501518  | 2.55015429239237  |
| C   | -6.26454802265435 | 1.88352673460943  | 2.32304100021026  |
| C   | -4.89992740773343 | -0.54896924919322 | 2.38591527860829  |
| C   | -6.97922192794608 | 0.68890844174695  | 2.21174929845163  |
| C   | -6.98543494896543 | 3.20577033736783  | 2.37444607517191  |
| C   | -6.28917131551164 | -0.52282444131024 | 2.24133340096905  |
| H   | -4.35498172050861 | -1.49042442664785 | 2.43287203249906  |
| H   | -8.06070173429414 | 0.70364871894764  | 2.09652548166708  |
| F   | -6.96687822108782 | 3.73184364538829  | 3.63288859914829  |
| F   | -8.28841177894743 | 3.10891302590055  | 2.00481248180867  |
| F   | -6.40416609308632 | 4.13719730104558  | 1.56108793586643  |
| C   | -7.02561329468244 | -1.83507180832311 | 2.16413978504639  |
| F   | -6.99259878571468 | -2.49496184390355 | 3.35828221943582  |
| F   | -8.33353543175966 | -1.68423169778866 | 1.83028763991795  |
| F   | -6.46659319800455 | -2.67434309469358 | 1.24496594576837  |
| H   | 0.54182593899303  | 4.11991167164487  | 0.91112234457054  |
| H   | 2.01201743571158  | 0.54344155751540  | 3.77475684370852  |
| H   | 2.22290469341560  | 2.39764544012159  | 5.30421211470327  |
| H   | -0.50801319365291 | 3.38520644035987  | 4.30783989961415  |
| 228 |                   |                   |                   |
| C-E |                   |                   |                   |
| C   | -1.17352706931966 | 4.19705386106581  | -0.73799980957834 |
| C   | 0.15617859306020  | 4.56722232043343  | -0.13184307271453 |
| C   | 0.81223246548997  | 5.75674711991026  | -0.85209815314258 |
| C   | 2.25528293519465  | 5.99310113947343  | -0.41896976290904 |
| O   | 3.10834468613417  | 4.87478046399243  | -0.67007930514386 |
| H   | 0.05194852980404  | 4.79395565680801  | 0.93903337183862  |
| H   | 0.23320368594131  | 6.67974229734288  | -0.68586422530789 |
| H   | 2.29928379638619  | 6.19341138493510  | 0.66587051477398  |
| C   | -2.35846593890963 | 5.05032323732281  | -0.48044979116193 |
| C   | -3.52327195028081 | 4.94177715266047  | -1.26672612998643 |
| C   | -2.36885250917808 | 5.98530471299659  | 0.56934990659857  |
| C   | -4.65594170771405 | 5.70261088040146  | -0.98965990062425 |
| H   | -3.53807603245731 | 4.25743142600444  | -2.11480460015179 |
| C   | -3.50099186121560 | 6.75072188779784  | 0.84674044807506  |
| H   | -1.48749234027403 | 6.10099307792465  | 1.19769938763803  |
| C   | -4.65459195863783 | 6.60851617817086  | 0.07501545917601  |
| H   | -5.54659412333711 | 5.58949594164105  | -1.60993812538832 |
| H   | -3.48128711882126 | 7.45854330778177  | 1.67717613187994  |
| H   | -5.54297238633078 | 7.20270248644483  | 0.29397952281569  |
| C   | -1.24608212428995 | 3.10340492710800  | -1.53002412912428 |

|   |                    |                   |                   |
|---|--------------------|-------------------|-------------------|
| H | -2.16449658952941  | 2.79635894405305  | -2.02615149463298 |
| H | -0.34069097502790  | 2.54622237817805  | -1.76870459522894 |
| H | -3.56315433465118  | -2.32960187437761 | -3.84247666932574 |
| C | -3.56031977412501  | -3.35626662517601 | -4.23191723747109 |
| C | -2.21684058749573  | -3.69001661463074 | -4.90861914596810 |
| H | -4.38147392889571  | -3.44552203340928 | -4.95933138492153 |
| H | -3.77152383384357  | -4.03787327608187 | -3.39761406876772 |
| C | -1.08000923530897  | -3.62278804833543 | -3.88286991962843 |
| C | -2.00955328122342  | -2.71559851686619 | -6.07653894303556 |
| C | -2.28113088301780  | -5.12550424569556 | -5.47199890158565 |
| C | -4.04679861598104  | 1.80923229142811  | -3.49219826699360 |
| C | 0.05313009006314   | -2.81702155799898 | -4.05554753668376 |
| C | -1.12756052082293  | -4.41777813499433 | -2.72465653416271 |
| H | -1.97006466220371  | -1.67114480218814 | -5.73493322683684 |
| H | -1.08675118601772  | -2.93515829606231 | -6.63280452728192 |
| H | -2.85039400654511  | -2.80407112685171 | -6.77971481599630 |
| H | -2.47365720362910  | -5.85927488355321 | -4.67668647064552 |
| H | -3.08958645864770  | -5.20646529024741 | -6.21463761434728 |
| H | -1.33437016588590  | -5.39661075822466 | -5.96102603848816 |
| C | -3.43391402491310  | 0.62568905639643  | -3.03620694289964 |
| C | -3.39429006558518  | 2.66375637804296  | -4.37423440762287 |
| H | -5.03210029040444  | 2.08716851038364  | -3.11627037951985 |
| C | 1.10215835644044   | -2.81793379236827 | -3.13604836065630 |
| H | 0.13840809824937   | -2.17011571229917 | -4.92805014178952 |
| C | -0.08525015361098  | -4.42486037400362 | -1.80447086133145 |
| H | -1.99819585052089  | -5.04539788664916 | -2.52733065847548 |
| C | -4.14146969941719  | -0.25841207897824 | -2.08153996072265 |
| C | -2.16032581938047  | 0.32498802804778  | -3.55045740526121 |
| C | -2.09106791788851  | 2.39981099943217  | -4.83218639123028 |
| H | -3.89995451402167  | 3.58169377435784  | -4.67994777971988 |
| C | 1.06142847715474   | -3.63491999186528 | -1.99744683081703 |
| H | 1.95851037445950   | -2.17184478140529 | -3.31801711422263 |
| H | -0.17171050590935  | -5.03511668613844 | -0.90411170855700 |
| C | -3.45501426974083  | -1.08267137157945 | -1.14148478573360 |
| C | -5.52557497884674  | -0.35470981750808 | -2.08284195230112 |
| C | -1.50582659356042  | 1.19746906613521  | -4.41814648196500 |
| H | -1.65165802272658  | -0.59355525214988 | -3.26759046220571 |
| C | -1.35680594349911  | 3.42034218359864  | -5.70365492527082 |
| C | 2.17403389469029   | -3.70857328204201 | -1.02407222974595 |
| O | -2.06082559406868  | -0.97269930985125 | -1.09428345389658 |
| C | -4.07284845700617  | -2.03965070213048 | -0.34583228046208 |
| H | -6.09892368633643  | 0.22898563164350  | -2.80415499054122 |
| C | -6.23045430636744  | -1.18738609843647 | -1.18478165369151 |
| H | -0.49707591403463  | 0.93670178200569  | -4.73497361870410 |
| C | -1.24837800996555  | 4.74990402426383  | -4.92622106757395 |
| C | -2.15172965815722  | 3.64728959593609  | -7.00503740261810 |
| C | 0.06239670331444   | 2.95717602627870  | -6.06193498864913 |
| C | 2.86918190474921   | -2.55363047468170 | -0.57067792903531 |
| C | 2.56726421731258   | -4.92027459443943 | -0.47942649284036 |
| P | -1.291511101558214 | -0.52278147067902 | 0.24432267264195  |
| C | -5.50401456315517  | -2.05367244421809 | -0.30213316243586 |
| C | -3.25778492432892  | -3.05310669076683 | 0.37799571617473  |
| C | -7.65019556494158  | -1.19442450373618 | -1.14470140781322 |
| H | -0.72180438163734  | 5.49902194174315  | -5.53628073432167 |
| H | -2.23710302952764  | 5.15653282799692  | -4.67060745598688 |
| H | -0.68860774535205  | 4.60847520602084  | -3.99108630361292 |
| H | -2.23736944962612  | 2.71339137289347  | -7.57944923161943 |
| H | -3.16744787042420  | 4.01600212570212  | -6.80340108971296 |

|   |                   |                   |                   |
|---|-------------------|-------------------|-------------------|
| H | -1.64140114520725 | 4.39234126553895  | -7.63361303113455 |
| H | 0.55094582611273  | 3.72571002087329  | -6.67803851194299 |
| H | 0.68030802326467  | 2.80213992385326  | -5.16603640652941 |
| H | 0.05183192178728  | 2.02275389287562  | -6.64218106450411 |
| O | 2.49731118584342  | -1.31987210962782 | -1.11224292232653 |
| C | 3.88662146955960  | -2.56625951266679 | 0.37180092058767  |
| H | 2.07899153911703  | -5.83688181550698 | -0.81651362419474 |
| C | 3.57970561774056  | -5.01282031930038 | 0.50458057168301  |
| O | -2.05591073495753 | -1.27979022003220 | 1.43027340799921  |
| N | 0.17602119885493  | -0.93392265463698 | 0.01692071540011  |
| N | -1.64889166219217 | 1.05630623457627  | 0.63572835061422  |
| C | -6.23169168180886 | -2.86502216463818 | 0.60528802732613  |
| C | -3.41746049989830 | -4.45647213444358 | 0.11868241500548  |
| C | -2.24824312875796 | -2.66565304284727 | 1.24218159696622  |
| H | -8.19366449258147 | -0.53299473847761 | -1.82205015901798 |
| C | -8.32836240166946 | -1.99934138078021 | -0.25509831493441 |
| P | 1.61881067143452  | -0.31320598572334 | -0.20127973573692 |
| C | 4.48929016751945  | -1.28576096730368 | 0.83326122820277  |
| C | 4.25197943748302  | -3.82574596040529 | 0.95280052140935  |
| C | 3.91932649377385  | -6.26345131448216 | 1.08660158114481  |
| S | -2.27057627209899 | 1.66353842374935  | 2.08737372924805  |
| H | -1.41018967957287 | 1.81997156090937  | -0.04615738141698 |
| C | -7.61060840177262 | -2.83477314878428 | 0.63129874140393  |
| H | -5.68635289660153 | -3.50270151268058 | 1.30006742000879  |
| C | -4.34139488940211 | -4.97088397967748 | -0.82785929047867 |
| C | -2.55746466016748 | -5.38213594082724 | 0.80025047533842  |
| C | -1.38019378683598 | -3.55240998156911 | 1.93332300696723  |
| H | -9.41882260177356 | -1.98775176066127 | -0.22678072827001 |
| O | 2.28112140925732  | -0.46619046721317 | 1.26377347879752  |
| N | 1.75874468471010  | 1.15793681182011  | -0.78409807648816 |
| C | 3.66833773646306  | -0.28382692893453 | 1.33378289732322  |
| C | 5.89969005581669  | -1.03936263533357 | 0.79559424986200  |
| C | 5.20863815860387  | -3.94948512725136 | 1.99437753534696  |
| H | 3.40639476461246  | -7.15857566645444 | 0.72816396865994  |
| C | 4.86055770104913  | -6.34906394536242 | 2.08897317935775  |
| O | -2.09552936582107 | 3.09629324064214  | 1.98062292474396  |
| O | -1.74083408165666 | 0.91164891708432  | 3.20428058267290  |
| H | -8.15056291611376 | -3.45062727974540 | 1.35136753829288  |
| H | -4.98260020947079 | -4.28292912316404 | -1.37512058249357 |
| C | -4.42828525743329 | -6.32575059070769 | -1.07460962819520 |
| C | -2.68506849543189 | -6.77174908546756 | 0.53477486003551  |
| C | -1.57552673310480 | -4.90371504896246 | 1.69883951411924  |
| C | -0.30769613672161 | -3.08453133884018 | 2.83771582593156  |
| S | 2.28715917727594  | 1.50831431415805  | -2.26332478863695 |
| C | 4.13833848379420  | 0.91423418262241  | 1.93714362216683  |
| C | 6.40537611023244  | 0.17215691843968  | 1.37644669883313  |
| C | 6.81273477423632  | -1.92138771077226 | 0.16296192359256  |
| C | 5.50338875507236  | -5.17776495379845 | 2.54995953285423  |
| H | 5.71117932430613  | -3.05646178053386 | 2.36118721103325  |
| H | 5.10619581615508  | -7.31525026464698 | 2.53183493445180  |
| H | -5.13973952727041 | -6.69350847604144 | -1.81542621336140 |
| C | -3.59988430817929 | -7.23827517803698 | -0.38329485309553 |
| H | -2.02910832188955 | -7.46367651224157 | 1.06706932836992  |
| H | -0.94514935408101 | -5.62564182473131 | 2.22161688573288  |
| C | 0.96020004041219  | -3.68851991849209 | 2.79068583117927  |
| C | -0.51539578480419 | -2.07561032118836 | 3.78733053885142  |
| O | 1.78368719436861  | 0.60194932133056  | -3.29423885970369 |
| O | 2.05836841749202  | 2.94270379607236  | -2.47612512729130 |



|   |                   |                   |                   |
|---|-------------------|-------------------|-------------------|
| C | 5.51041327023116  | 1.10137688209177  | 1.95804937006634  |
| C | 3.21594121992470  | 1.88956982661028  | 2.55979875248255  |
| C | 7.80325386595137  | 0.41866439875120  | 1.34640555764929  |
| C | 8.16335046219582  | -1.64082295099760 | 0.13274194849544  |
| H | 6.43172798632047  | -2.81999707765665 | -0.32088708189491 |
| H | 6.23732026653194  | -5.24303182113036 | 3.35464625970822  |
| H | -3.68109253212904 | -8.30729961855360 | -0.58426585443992 |
| C | 1.96386559476593  | -3.31486505414906 | 3.67674621632984  |
| H | 1.17042105849100  | -4.44259214186124 | 2.03055962441451  |
| C | 0.49691366083767  | -1.70618130658045 | 4.67272246081526  |
| H | -1.47849600510020 | -1.57234389983369 | 3.84925857405935  |
| H | 5.91728472784780  | 1.99580206053136  | 2.43223991779850  |
| C | 2.13305359795810  | 1.47037419387294  | 3.34748187758020  |
| C | 3.43456143330548  | 3.27106325886292  | 2.43064236050342  |
| H | 8.17801541551612  | 1.34184802425873  | 1.79201121798439  |
| C | 8.66667635952711  | -0.46785559066674 | 0.73960650184280  |
| H | 8.84499132140733  | -2.32352525591199 | -0.37626672721497 |
| F | -8.24505725020855 | 1.97698837632581  | -0.13703313618264 |
| C | 1.75558006201288  | -2.32153735179879 | 4.64901407677206  |
| H | 2.93375611048854  | -3.80781987067053 | 3.59803048151902  |
| H | 0.28433668168566  | -0.92099891342141 | 5.39753959788256  |
| C | 1.32953648823967  | 2.39226665650668  | 4.01469451807740  |
| H | 1.91312301178556  | 0.40942447900374  | 3.45554427486927  |
| C | 2.62313806937662  | 4.18397620681320  | 3.09802206107657  |
| H | 4.22641828943928  | 3.63647219327118  | 1.77544789937700  |
| H | 9.73670555554711  | -0.25731465122800 | 0.71131997772858  |
| C | -7.04645125081174 | 2.57458633248150  | 0.09141681768400  |
| C | 2.86645769468975  | -1.98020636959075 | 5.64808239132061  |
| C | 1.56242795319744  | 3.76995699133070  | 3.92154806522424  |
| H | 0.50266296708547  | 2.01299415145712  | 4.61325410900019  |
| H | 2.82622483284946  | 5.24857482060696  | 2.96778392689564  |
| F | -7.30641297666775 | 3.80798744865497  | 0.60490523815303  |
| C | -6.17247813650580 | 1.76638973717993  | 1.02015728158360  |
| F | -6.45565099627407 | 2.76889091411856  | -1.12072961332622 |
| C | 4.15283094401673  | -1.58309469771699 | 4.89780806299709  |
| C | 3.15090415573258  | -3.23333824119561 | 6.50340138049011  |
| C | 2.47707745353444  | -0.82661471479127 | 6.58304506434036  |
| C | 0.71933968443678  | 4.80185863363147  | 4.67853382017777  |
| C | -6.74818062006999 | 0.81150117904194  | 1.86376294058257  |
| C | -4.80359959480797 | 2.03100748656637  | 1.06850712830908  |
| H | 4.49640181945889  | -2.38654628488457 | 4.23353345279159  |
| H | 3.99917566255483  | -0.68171665844183 | 4.28980105132544  |
| H | 4.95739580492531  | -1.37357703600820 | 5.61873544193010  |
| H | 2.25136132832241  | -3.54491166643531 | 7.05390822724834  |
| H | 3.47633749144530  | -4.07758525302745 | 5.87935902398793  |
| H | 3.94699465027019  | -3.02125070122656 | 7.23326569026288  |
| H | 3.30721325405360  | -0.62141454714428 | 7.27420224782887  |
| H | 2.27305275128182  | 0.09865275484205  | 6.02503384020419  |
| H | 1.59306762781428  | -1.07166703372831 | 7.18976718501026  |
| C | 1.64449886007690  | 5.65452797561919  | 5.57018496425698  |
| C | -0.34176501210069 | 4.14066271165671  | 5.56996290751205  |
| C | -0.00713256028981 | 5.71402308094190  | 3.67094960013383  |
| C | -5.94415593503483 | 0.11382255351586  | 2.76307704701102  |
| H | -7.81632598855471 | 0.61002151574892  | 1.81400173995485  |
| C | -4.01898386823354 | 1.30725231221165  | 1.96795981652118  |
| H | -4.35750130514502 | 2.79663787015843  | 0.43045432461340  |
| H | 2.39544969188328  | 6.19456460296417  | 4.97724354101635  |
| H | 1.05446160801367  | 6.39826424732074  | 6.12713885057267  |

|   |                   |                   |                   |
|---|-------------------|-------------------|-------------------|
| H | 2.17759097068406  | 5.02334970704020  | 6.29587837941286  |
| H | 0.11475640669554  | 3.48835676580459  | 6.32876782416257  |
| H | -0.91398125603156 | 4.91820448313119  | 6.09668406466692  |
| H | -1.05161406291523 | 3.54376891213607  | 4.97966506053970  |
| H | -0.57264559171580 | 6.49463516406346  | 4.20293430540257  |
| H | 0.69999056664246  | 6.21089721506707  | 2.99110237544250  |
| H | -0.71501308364553 | 5.12530699661875  | 3.07138303406619  |
| C | -4.56882529015832 | 0.35219927675189  | 2.81659399037940  |
| C | -6.54289848125531 | -0.86524788630601 | 3.74349199504303  |
| H | -3.92744374805419 | -0.18572256129747 | 3.51338259967707  |
| F | -5.84101900511603 | -2.03124975094965 | 3.78480175062134  |
| F | -7.83160753383333 | -1.17114509277790 | 3.45316555171115  |
| F | -6.52644921484753 | -0.35539930155707 | 5.00813946527865  |
| C | 4.87924665887190  | 2.24531605778829  | -1.59017076283677 |
| C | 4.07417187938628  | 1.28961758125621  | -2.21181152947627 |
| H | 4.44225909741663  | 3.11675236058419  | -1.09999295508721 |
| C | 6.26583143632604  | 2.07910649031632  | -1.61963195509238 |
| C | 4.63105537076184  | 0.17678342990916  | -2.83554950985857 |
| C | 6.84267362925734  | 0.96399849304422  | -2.23050347231543 |
| C | 7.13594368878212  | 3.16678297700941  | -1.03945161081587 |
| C | 6.01788156008324  | 0.01240017125573  | -2.82897738692484 |
| H | 3.97978843144295  | -0.54534204853347 | -3.32525956210782 |
| H | 7.92266671325708  | 0.83480205327053  | -2.23121765738975 |
| F | 6.71050799725667  | 3.56249693513169  | 0.19318994904947  |
| F | 7.12866583739007  | 4.27665194961566  | -1.82921518867469 |
| F | 8.43448295867289  | 2.78172638818596  | -0.91114211499202 |
| C | 6.59901914315475  | -1.19386343320915 | -3.51971836946621 |
| F | 7.92992653373515  | -1.33810833585387 | -3.29151735334846 |
| F | 5.99114756112761  | -2.34711745185544 | -3.11559503909894 |
| F | 6.43081914654357  | -1.12357474697884 | -4.87197798455020 |
| H | 2.69891859228641  | 4.33381673018088  | -1.38108160592835 |
| H | 2.64714296441645  | 6.88891602166187  | -0.93701758713906 |
| H | 0.79500212235290  | 5.57003581449410  | -1.93959288997010 |
| H | 0.82232393457004  | 3.69736126101594  | -0.19596426587007 |

228

C-TS1

|   |                   |                  |                   |
|---|-------------------|------------------|-------------------|
| C | -1.18386769018213 | 4.16702320656445 | -0.62876822530100 |
| C | 0.13419675372626  | 4.55804032691640 | -0.04827784033150 |
| C | 0.77401154921666  | 5.68000399511342 | -0.89784963291988 |
| C | 2.22258440966959  | 5.95563317931329 | -0.50121647995914 |
| O | 3.06658073627942  | 4.81949644586847 | -0.63822485920349 |
| H | 0.03155191636129  | 4.89614202048932 | 0.99079626647727  |
| H | 0.19015912701549  | 6.60973349405494 | -0.80758048823640 |
| H | 2.27708591639028  | 6.27108813078339 | 0.55472053637575  |
| C | -2.35506707299650 | 5.02525756522401 | -0.44218366206336 |
| C | -3.51238190626491 | 4.85454058890667 | -1.23214380538015 |
| C | -2.36706541681180 | 6.03655027452778 | 0.54022030861208  |
| C | -4.64126872790115 | 5.63998376683162 | -1.02684823713099 |
| H | -3.52261976280827 | 4.10477600552471 | -2.02210926939438 |
| C | -3.49625575429905 | 6.82260059151283 | 0.74368465962758  |
| H | -1.49607314351849 | 6.18504842220796 | 1.17569675778703  |
| C | -4.64023251829890 | 6.62346809740325 | -0.03340339671344 |
| H | -5.52906656864647 | 5.48240432690791 | -1.64038336348651 |
| H | -3.48895707225877 | 7.58750938880391 | 1.52125441194252  |
| H | -5.52880864691681 | 7.23440305104255 | 0.13246698931182  |
| C | -1.24647334453045 | 2.97487067357233 | -1.34816533877219 |
| H | -2.11438020237850 | 2.75679609989781 | -1.97130144206747 |
| H | -0.29109269776585 | 2.58396185759409 | -1.70999500730607 |

|   |                   |                   |                   |
|---|-------------------|-------------------|-------------------|
| H | -3.55917309784319 | -2.33221113439139 | -3.85052089781533 |
| C | -3.55568484233540 | -3.35838979592696 | -4.24134740319671 |
| C | -2.21008496959223 | -3.69353160706825 | -4.91311242781962 |
| H | -4.37432407238138 | -3.44658311539539 | -4.97180727423596 |
| H | -3.77065080253230 | -4.03982969867679 | -3.40799455362407 |
| C | -1.07638888373077 | -3.62462395559696 | -3.88395780755979 |
| C | -1.99884032576548 | -2.72130888336134 | -6.08218950623164 |
| C | -2.27313698997343 | -5.12989504935628 | -5.47432529445819 |
| C | -4.01397366036810 | 1.84358363723254  | -3.44888680324203 |
| C | 0.05788004740419  | -2.82012097951276 | -4.05508527478175 |
| C | -1.12869763931825 | -4.41620959659378 | -2.72373481916756 |
| H | -1.95943353602716 | -1.67632884299451 | -5.74197729703248 |
| H | -1.07449376921544 | -2.94219419705976 | -6.63541924932465 |
| H | -2.83782842143800 | -2.81028277998363 | -6.78757766870386 |
| H | -2.46757623712483 | -5.86186880986512 | -4.67788982412200 |
| H | -3.07988883105223 | -5.21234649027546 | -6.21874163917248 |
| H | -1.32509365486670 | -5.40196538160258 | -5.96040170822443 |
| C | -3.42097427694550 | 0.63943363765551  | -3.02276676036077 |
| C | -3.34680996592334 | 2.70962639880501  | -4.31062571242992 |
| H | -4.99720073477435 | 2.12417482673197  | -3.06838015633179 |
| C | 1.10260422560003  | -2.81817012588512 | -3.13084370093887 |
| H | 0.14726585876060  | -2.17660422531604 | -4.92975555560941 |
| C | -0.09040280371798 | -4.42037367700346 | -1.79908854603637 |
| H | -2.00054139411750 | -5.04236809911895 | -2.52729253528611 |
| C | -4.13645541225258 | -0.25518809547124 | -2.08413153599681 |
| C | -2.15300149826378 | 0.33045769858800  | -3.54504266004073 |
| C | -2.05087008239736 | 2.43184942473984  | -4.78124487829437 |
| H | -3.83804871684967 | 3.64234965681770  | -4.59545958624207 |
| C | 1.05673967454420  | -3.63100646380413 | -1.98968706192531 |
| H | 1.96050579202519  | -2.17359412974660 | -3.31078057241088 |
| H | -0.18163896650538 | -5.02631268891633 | -0.89638745273811 |
| C | -3.44927380215854 | -1.08883991957780 | -1.15230525294383 |
| C | -5.51999152887789 | -0.34696315150595 | -2.09328541201790 |
| C | -1.48578507392796 | 1.21041669102979  | -4.39548740608199 |
| H | -1.65885917235268 | -0.60102984230974 | -3.27904015546472 |
| C | -1.29729895688796 | 3.45908291287868  | -5.62895025849017 |
| C | 2.16615170593454  | -3.70059568186553 | -1.01261261052472 |
| O | -2.05995251462506 | -0.98080534791389 | -1.09806597483721 |
| C | -4.07414681455664 | -2.04966991225166 | -0.36616259445871 |
| H | -6.08994426922398 | 0.24587552892240  | -2.81011349283339 |
| C | -6.22906068711623 | -1.18558363971167 | -1.20358934660145 |
| H | -0.48358625870344 | 0.93799638361610  | -4.72241148011113 |
| C | -1.06882533475166 | 4.72467997305574  | -4.77432237738692 |
| C | -2.13243397508893 | 3.82135362600613  | -6.87262664838393 |
| C | 0.07151670627780  | 2.93617998796606  | -6.08760886381128 |
| C | 2.85676628283421  | -2.54271708463699 | -0.55953253359268 |
| C | 2.56224438542196  | -4.91060219569395 | -0.46664777284540 |
| P | -1.31482908057258 | -0.48534071105044 | 0.25008592944832  |
| C | -5.50544987573455 | -2.05906831970495 | -0.32554573415773 |
| C | -3.26071294945740 | -3.06287385650112 | 0.35962279025108  |
| C | -7.64857132939418 | -1.18673349619987 | -1.16344352106993 |
| H | -0.54622574727112 | 5.49131900164158  | -5.36596221439353 |
| H | -2.01738655435947 | 5.15478194659639  | -4.42168599220005 |
| H | -0.45096450193094 | 4.48904145207127  | -3.89638410480354 |
| H | -2.31377762611985 | 2.93278565248262  | -7.49447438748813 |
| H | -3.10730119399552 | 4.25086071198597  | -6.60223137124181 |
| H | -1.59661098396364 | 4.56402453246048  | -7.48234032017050 |
| H | 0.57127960340916  | 3.70611603992863  | -6.69293112408512 |

|   |                   |                   |                   |
|---|-------------------|-------------------|-------------------|
| H | 0.72681607695719  | 2.70123102069103  | -5.23697006982390 |
| H | -0.02719430633575 | 2.03412793232511  | -6.70921776925603 |
| O | 2.47861682950098  | -1.31005396137669 | -1.09626173937289 |
| C | 3.87682438737087  | -2.55284182393140 | 0.38027481888675  |
| H | 2.07582991231588  | -5.82872058111502 | -0.80237315714264 |
| C | 3.57505873995382  | -4.99948279543344 | 0.51737406568540  |
| O | -2.07685753708104 | -1.28910940480341 | 1.42229373067205  |
| N | 0.15589932240418  | -0.93820492809159 | 0.03997209117424  |
| N | -1.65287752190101 | 1.08005918322145  | 0.56097680296233  |
| C | -6.23688210172347 | -2.87005523655306 | 0.57934051173837  |
| C | -3.41744797385582 | -4.46626283141681 | 0.10154100748867  |
| C | -2.25488355502957 | -2.66808878876470 | 1.22605011286302  |
| H | -8.18938249304295 | -0.51978798828210 | -1.83768536607802 |
| C | -8.33025237035597 | -1.99104206066725 | -0.27585126558851 |
| P | 1.58745090435677  | -0.31519903283229 | -0.17876354381317 |
| C | 4.47808632037967  | -1.27004560585868 | 0.83720144964072  |
| C | 4.24619575058735  | -3.81050894433715 | 0.96224050135756  |
| C | 3.91696160908045  | -6.24821692299395 | 1.10197883002008  |
| S | -2.21447853113889 | 1.68061531427222  | 1.97600324780775  |
| H | -1.40451041976112 | 2.10319670362093  | -0.38327032170049 |
| C | -7.61562360872786 | -2.83245252597335 | 0.60735965151416  |
| H | -5.69357224552678 | -3.51164506719077 | 1.27210691378984  |
| C | -4.33978167864253 | -4.98445577013584 | -0.84467681434013 |
| C | -2.55714567456791 | -5.38950671893607 | 0.78610145683458  |
| C | -1.38695202977977 | -3.55519795208168 | 1.91924239593404  |
| H | -9.42063268228728 | -1.97371954632179 | -0.24626008160038 |
| O | 2.27148808635704  | -0.45625098012112 | 1.27968227770237  |
| N | 1.74672183109679  | 1.16115281326849  | -0.76352747769350 |
| C | 3.65621640574800  | -0.26920558907485 | 1.33872532730873  |
| C | 5.88759416333122  | -1.02040406209081 | 0.79205256864136  |
| C | 5.20481170549885  | -3.93067398961509 | 2.00235645263023  |
| H | 3.40420596788255  | -7.14473209293909 | 0.74674532465177  |
| C | 4.85949324271997  | -6.33032932741020 | 2.10350736419777  |
| O | -2.08316693568160 | 3.12801440789986  | 1.86191055432834  |
| O | -1.66399782013337 | 0.99982610444822  | 3.13593313797728  |
| H | -8.15775165821748 | -3.44750131860628 | 1.32658724054027  |
| H | -4.98228238463247 | -4.29832631386660 | -1.39295003963575 |
| C | -4.42424941643010 | -6.33997756467581 | -1.08951519766137 |
| C | -2.68187191336291 | -6.77965960448286 | 0.52236415066462  |
| C | -1.57828869810107 | -4.90730839939336 | 1.68624662402726  |
| C | -0.31874596517522 | -3.08441380743294 | 2.82756679533482  |
| S | 2.26014613782656  | 1.50334380077582  | -2.24062136701059 |
| C | 4.12786219438469  | 0.93216950783816  | 1.93594847692995  |
| C | 6.39391803205863  | 0.19331956765619  | 1.36776104803661  |
| C | 6.79950757092779  | -1.90242429023297 | 0.15759103198547  |
| C | 5.50188976056048  | -5.15725127960536 | 2.56050895423468  |
| H | 5.70599635091322  | -3.03596390203883 | 2.36698760959926  |
| H | 5.10636445058532  | -7.29512568195256 | 2.54875819519548  |
| H | -5.13489275843507 | -6.71025844228259 | -1.82995125896097 |
| C | -3.59451950594134 | -7.24981858777641 | -0.39625979917675 |
| H | -2.02524661106112 | -7.46952606281126 | 1.05668997342785  |
| H | -0.94885170664362 | -5.62789441568391 | 2.21214244008176  |
| C | 0.94449435257999  | -3.69963247862770 | 2.79908166222989  |
| C | -0.52372652014278 | -2.06050867388562 | 3.76199226917774  |
| O | 1.74234111342280  | 0.61326013466434  | -3.27874785261319 |
| O | 2.03508362356108  | 2.94458677169525  | -2.45043511333514 |
| C | 5.49946105253229  | 1.12273297866941  | 1.95017885069872  |
| C | 3.20490559113566  | 1.90699079233418  | 2.55931041742876  |

|   |                   |                   |                   |
|---|-------------------|-------------------|-------------------|
| C | 7.79133454720081  | 0.44148085414078  | 1.33164697432403  |
| C | 8.14966680157055  | -1.62016738004873 | 0.12120967090141  |
| H | 6.41761264096728  | -2.80322493246036 | -0.32154591440385 |
| H | 6.23679331212197  | -5.21967444074133 | 3.36456294723935  |
| H | -3.67332842607705 | -8.31939357895372 | -0.59549069959428 |
| C | 1.94485031826729  | -3.32429787180425 | 3.68812684813319  |
| H | 1.15462233248767  | -4.46420492850098 | 2.04954260044940  |
| C | 0.48465867819030  | -1.69049460160450 | 4.65170417047614  |
| H | -1.47989022200511 | -1.54275337762890 | 3.80644605327763  |
| H | 5.90681309784541  | 2.01907700366475  | 2.42051334500495  |
| C | 2.12424147826329  | 1.48587446727039  | 3.34885059068764  |
| C | 3.41666903697248  | 3.28911522041258  | 2.42543707707385  |
| H | 8.16671229014333  | 1.36593702016760  | 1.77417570118531  |
| C | 8.65378178915177  | -0.44520537725041 | 0.72354933859897  |
| H | 8.83026733608780  | -2.30348929454416 | -0.38845673932576 |
| F | -8.27882158739451 | 1.94560713927900  | -0.03386622510288 |
| C | 1.73744408780201  | -2.31781278037046 | 4.64695369686214  |
| H | 2.91125340601660  | -3.82615544327440 | 3.62227976899990  |
| H | 0.27298419685349  | -0.89381962326890 | 5.36419482952278  |
| C | 1.31565195069166  | 2.40576832723541  | 4.01185262809827  |
| H | 1.90704610858319  | 0.42474065867259  | 3.45847137876727  |
| C | 2.59950415985440  | 4.20093312224955  | 3.08818662437031  |
| H | 4.20768275245797  | 3.65589229724089  | 1.77011319363718  |
| H | 9.72344104515931  | -0.23331862809339 | 0.69094289291141  |
| C | -7.06799923452067 | 2.53145333266146  | 0.14388809176664  |
| C | 2.84404460230173  | -1.97307502443753 | 5.64979158224815  |
| C | 1.54057746927724  | 3.78414913941019  | 3.91289866961986  |
| H | 0.48768753294644  | 2.02377422469773  | 4.60636981879385  |
| H | 2.79848363772710  | 5.26626898916195  | 2.95471041509307  |
| F | -7.29820719336531 | 3.77856568308894  | 0.64741765352005  |
| C | -6.16397636540383 | 1.73199316053337  | 1.04712888945247  |
| F | -6.52249667623753 | 2.71215320056471  | -1.09553868958322 |
| C | 4.13396824079113  | -1.58173875209895 | 4.90252628998970  |
| C | 3.12359727856915  | -3.22101476272628 | 6.51406204611178  |
| C | 2.45213485916599  | -0.81397514427467 | 6.57689465049595  |
| C | 0.68938491859361  | 4.81203634170979  | 4.66712052226323  |
| C | -6.70215742183781 | 0.76769870874918  | 1.90422035720872  |
| C | -4.79804105906325 | 2.01485356107132  | 1.05913867070338  |
| H | 4.47770182551427  | -2.38927189096981 | 4.24327666779225  |
| H | 3.98340362674876  | -0.68344088415195 | 4.28907441918462  |
| H | 4.93673052004496  | -1.36960452404552 | 5.62486307902480  |
| H | 2.22119000418430  | -3.52797736618982 | 7.06247785949133  |
| H | 3.45046646979300  | -4.06971491269319 | 5.89691465826988  |
| H | 3.91687581892944  | -3.00550819059886 | 7.24611151002022  |
| H | 3.27813217617478  | -0.60838795144804 | 7.27302542677104  |
| H | 2.25477387876179  | 0.10952066321336  | 6.01361875621605  |
| H | 1.56275008631257  | -1.05364292392624 | 7.17787985395569  |
| C | 1.60765888862845  | 5.67944707399986  | 5.55127301499604  |
| C | -0.36346635412286 | 4.14437298199828  | 5.56364324851132  |
| C | -0.05087373202341 | 5.71213583986406  | 3.65817033346539  |
| C | -5.85993490357669 | 0.08768251721765  | 2.78219774700790  |
| H | -7.76677689072643 | 0.54452900584297  | 1.88101873269015  |
| C | -3.97252319677116 | 1.31470156046403  | 1.93883455191537  |
| H | -4.38021383134130 | 2.77954051617472  | 0.40325148485159  |
| H | 2.35132330055129  | 6.22449897699652  | 4.95356348654301  |
| H | 1.01169634797351  | 6.41927261619043  | 6.10726914311018  |
| H | 2.14976081685369  | 5.05717919764818  | 6.27782561877283  |
| H | 0.10223155243483  | 3.50117377991404  | 6.32445410056189  |

|     |                   |                   |                   |
|-----|-------------------|-------------------|-------------------|
| H   | -0.94262619943470 | 4.91846442564618  | 6.08809082254204  |
| H   | -1.06698978953681 | 3.53596553378802  | 4.97765989514202  |
| H   | -0.62272797046980 | 6.48910889126371  | 4.18901861187704  |
| H   | 0.65083086271674  | 6.21470233747833  | 2.97593707532586  |
| H   | -0.75506309166057 | 5.11029017356888  | 3.06639850593184  |
| C   | -4.48858522559378 | 0.35543552877083  | 2.80388201033574  |
| C   | -6.41227810129073 | -0.91126395569461 | 3.76863879915156  |
| H   | -3.82016563769006 | -0.16749443445572 | 3.48664276614788  |
| F   | -5.69471581403436 | -2.06879666492333 | 3.77103287341826  |
| F   | -7.70639095748776 | -1.23290986377732 | 3.51713880650827  |
| F   | -6.36210428102356 | -0.41983235302604 | 5.04028353277487  |
| C   | 4.87092933897358  | 2.22483564890762  | -1.60808436201612 |
| C   | 4.04782655474440  | 1.27760187666162  | -2.21833362112642 |
| H   | 4.45109477900278  | 3.09882692430009  | -1.10922411108172 |
| C   | 6.25555323491760  | 2.04764529889244  | -1.65670507039935 |
| C   | 4.58734297646965  | 0.15850419111131  | -2.84669984713190 |
| C   | 6.81419443951385  | 0.92559609558875  | -2.27118224887663 |
| C   | 7.14132258749903  | 3.13181706888520  | -1.09477890914785 |
| C   | 5.97232345572501  | -0.01984629559093 | -2.85552237905869 |
| H   | 3.92366110239962  | -0.55880336656263 | -3.32653730100283 |
| H   | 7.89278354860013  | 0.78590855967036  | -2.28507067984772 |
| F   | 6.73364696543975  | 3.54159161553312  | 0.13917331677943  |
| F   | 7.13152024625028  | 4.23670594521322  | -1.89372539517538 |
| F   | 8.43812526706150  | 2.73946829562449  | -0.98055115210456 |
| C   | 6.53290388639444  | -1.23653741493100 | -3.54535684938420 |
| F   | 7.86561482100152  | -1.39063341429071 | -3.33453116792655 |
| F   | 5.92069611381647  | -2.38066051089957 | -3.12412192818205 |
| F   | 6.34654717762399  | -1.17418542085557 | -4.89580671011481 |
| H   | 2.69997212560274  | 4.25362024455545  | -1.35730212692870 |
| H   | 2.59791221844205  | 6.79552616366951  | -1.11789511364372 |
| H   | 0.74743554848511  | 5.39078333721361  | -1.96119057359424 |
| H   | 0.80109448181769  | 3.68613101315913  | -0.04273947093581 |
| 228 |                   |                   |                   |
| C-I |                   |                   |                   |
| C   | -1.18866641017145 | 4.36512425456305  | -0.63306580846945 |
| C   | 0.10039283804229  | 4.71720956711739  | -0.00190884876408 |
| C   | 0.81615124921861  | 5.73939665186118  | -0.93144219886317 |
| C   | 2.26908811124625  | 5.96337017584794  | -0.50924157457720 |
| O   | 3.04142247100897  | 4.77767414078069  | -0.51638319175958 |
| H   | -0.01299722724443 | 5.14750060929650  | 0.99768823109384  |
| H   | 0.27815052399455  | 6.70028326026703  | -0.92398524680339 |
| H   | 2.31480348574832  | 6.37466262034010  | 0.51316684861482  |
| C   | -2.37180179871753 | 5.17492962655654  | -0.44011597877466 |
| C   | -3.54235544817973 | 4.94308718826831  | -1.20240253737391 |
| C   | -2.40142521841436 | 6.20048506391591  | 0.53448694352464  |
| C   | -4.69262196783770 | 5.68919932788509  | -0.98396284646931 |
| H   | -3.54860075373947 | 4.16798216286875  | -1.96749620569658 |
| C   | -3.55169218737419 | 6.94761590075644  | 0.74577381196496  |
| H   | -1.52420155414109 | 6.38936067489345  | 1.15038753767474  |
| C   | -4.70238197199758 | 6.69039542528213  | -0.00727517058644 |
| H   | -5.59091193881801 | 5.48408727129510  | -1.56658770104332 |
| H   | -3.56111792536322 | 7.72430321704152  | 1.51109266709154  |
| H   | -5.61034527891158 | 7.26901690933186  | 0.16963384072976  |
| C   | -1.16953961419832 | 3.22053800468007  | -1.50700568752212 |
| H   | -1.96789611536310 | 3.13977667923273  | -2.24615560046141 |
| H   | -0.17279999058437 | 3.04298297732090  | -1.93460900597353 |
| H   | -3.54221632799716 | -2.31140628303704 | -3.83091975484299 |
| C   | -3.54056502050747 | -3.33512453448350 | -4.22793218480035 |

|   |                   |                   |                   |
|---|-------------------|-------------------|-------------------|
| C | -2.19630337189583 | -3.66707189106606 | -4.90361814054189 |
| H | -4.36033963412132 | -3.41835403821910 | -4.95776580290969 |
| H | -3.75528074716422 | -4.02100575921905 | -3.39814289686222 |
| C | -1.06067764829955 | -3.60683526739007 | -3.87608635654542 |
| C | -1.98618373776445 | -2.68623008710703 | -6.06571155158466 |
| C | -2.26148440044694 | -5.09928796374471 | -5.47504962248836 |
| C | -4.01779761820080 | 1.83795939426304  | -3.40857180059119 |
| C | 0.07710248331299  | -2.80735365195806 | -4.04688664240931 |
| C | -1.11482134399024 | -4.40204119678048 | -2.71853860948337 |
| H | -1.94349879187541 | -1.64427057357448 | -5.71651452009078 |
| H | -1.06386308995919 | -2.90452450414345 | -6.62339468002072 |
| H | -2.82746476594768 | -2.76774135527020 | -6.76934914576207 |
| H | -2.45487369939657 | -5.83641585066524 | -4.68313008476850 |
| H | -3.06974212937041 | -5.17613246487817 | -6.21852581309340 |
| H | -1.31443732535905 | -5.36869455611545 | -5.96461062163908 |
| C | -3.39784848021190 | 0.64995177174387  | -2.97305309697980 |
| C | -3.38616502521323 | 2.69829835339059  | -4.30213974296747 |
| H | -5.00266947347596 | 2.10424369683324  | -3.02267975049310 |
| C | 1.12310272296100  | -2.81358106973817 | -3.12425503531936 |
| H | 0.16784504929693  | -2.16116054661012 | -4.91943203789876 |
| C | -0.07541350222342 | -4.41383416632655 | -1.79527070348832 |
| H | -1.98965186051827 | -5.02407454286843 | -2.52216504585470 |
| C | -4.10575942017583 | -0.26326050749559 | -2.04477009713939 |
| C | -2.12440158847320 | 0.36746071074637  | -3.49758358989308 |
| C | -2.09401789755105 | 2.43612654105174  | -4.79385294772260 |
| H | -3.90678962181281 | 3.60956341561105  | -4.60498075715659 |
| C | 1.07501769942846  | -3.62925831098674 | -1.98545631850891 |
| H | 1.98469959227662  | -2.17354000005027 | -3.30313124448359 |
| H | -0.16897104444537 | -5.02049305443118 | -0.89326614569592 |
| C | -3.42083734061298 | -1.13053842052795 | -1.14119743762461 |
| C | -5.49084961195963 | -0.34253099302780 | -2.04585385587903 |
| C | -1.49025454606268 | 1.24405201460813  | -4.37741960630904 |
| H | -1.60304644697008 | -0.54435202274517 | -3.21743435032424 |
| C | -1.39622820311412 | 3.44089470526927  | -5.71414261827702 |
| C | 2.18537835273332  | -3.70488455602034 | -1.01012060113327 |
| O | -2.03135788538506 | -1.05981712905971 | -1.09648027459161 |
| C | -4.05531347536047 | -2.08755158893909 | -0.35755117693841 |
| H | -6.06156294090262 | 0.26850752373874  | -2.74640676041121 |
| C | -6.20413068453642 | -1.18921430147114 | -1.16778938914443 |
| H | -0.48500942494279 | 0.98805238394963  | -4.70827003814152 |
| C | -1.26003817554878 | 4.79153214377495  | -4.97897469908979 |
| C | -2.24213804357135 | 3.63641779837988  | -6.98845255195257 |
| C | 0.00880945818597  | 2.97258183907880  | -6.11882142392456 |
| C | 2.87712601878681  | -2.54973393780720 | -0.55127442795387 |
| C | 2.57986885183782  | -4.91813817952716 | -0.47041870848768 |
| P | -1.30192817929769 | -0.51708657436062 | 0.24920640618906  |
| C | -5.48530584803534 | -2.08049108004165 | -0.30428930516496 |
| C | -3.24473939624173 | -3.10367947037596 | 0.36748202913429  |
| C | -7.62337068789567 | -1.17495963194545 | -1.11940230875668 |
| H | -0.79273366958773 | 5.53615027609629  | -5.64062061638776 |
| H | -2.23636864376762 | 5.18604571889301  | -4.66264296542976 |
| H | -0.62650034842598 | 4.68519561854416  | -4.08680726741229 |
| H | -2.35443685030106 | 2.68663889702885  | -7.53075104736060 |
| H | -3.24784552206393 | 4.01454428464668  | -6.75641761571079 |
| H | -1.75529952913951 | 4.36045224632498  | -7.65893550393551 |
| H | 0.47352914781450  | 3.72932155574956  | -6.76725926523015 |
| H | 0.66130667588887  | 2.83001223544023  | -5.24543262683566 |
| H | -0.02498815736567 | 2.02784829446180  | -6.68050431969918 |

|   |                   |                   |                   |
|---|-------------------|-------------------|-------------------|
| O | 2.49941510152248  | -1.31216603207764 | -1.07580515057818 |
| C | 3.89639437828020  | -2.56696327487091 | 0.38931057796160  |
| H | 2.09121997879611  | -5.83365006087008 | -0.81006879915025 |
| C | 3.59233778025678  | -5.01357905128673 | 0.51334987585511  |
| O | -2.06140564803752 | -1.33104036601160 | 1.42730096666209  |
| N | 0.17434308915832  | -0.99068955154952 | 0.06566197233505  |
| N | -1.64102422523371 | 1.03394644632205  | 0.48140576026637  |
| C | -6.22013201447280 | -2.89045817231943 | 0.59882039656393  |
| C | -3.40278032573214 | -4.50611875817521 | 0.11062189561163  |
| C | -2.23969672102031 | -2.70541436952694 | 1.23451758834844  |
| H | -8.16074760267916 | -0.49503765956768 | -1.78350221636653 |
| C | -8.30870043757990 | -1.97937241652359 | -0.23474314012784 |
| P | 1.59007336625990  | -0.34133449770721 | -0.14509319048254 |
| C | 4.49500772804177  | -1.28666207712752 | 0.85626381768827  |
| C | 4.26458463368277  | -3.82774691446400 | 0.96468652118108  |
| C | 3.93245775930056  | -6.26557187761484 | 1.09183122365077  |
| S | -2.16026328433335 | 1.71185784565312  | 1.83585903659518  |
| H | -1.29872169147890 | 2.33728066696676  | -0.79525018544480 |
| C | -7.59809085745953 | -2.83647503612086 | 0.63672607795770  |
| H | -5.67928652710238 | -3.54418328884414 | 1.28215349426914  |
| C | -4.32614547980253 | -5.02339312219116 | -0.83523561843457 |
| C | -2.54362408974566 | -5.42991965625424 | 0.79599976969268  |
| C | -1.37373282782351 | -3.59477717624581 | 1.92845887025815  |
| H | -9.39862075372132 | -1.94970106582566 | -0.19757714819827 |
| O | 2.28748904182740  | -0.48485325846749 | 1.30904929162862  |
| N | 1.74862627834041  | 1.14783279303870  | -0.70990319922917 |
| C | 3.66978413774724  | -0.29267434466141 | 1.36626874503826  |
| C | 5.90370800025251  | -1.03382926023624 | 0.81327392195446  |
| C | 5.22230835130417  | -3.95414577803881 | 2.00484721911091  |
| H | 3.41862496975520  | -7.15964343047780 | 0.73197396149182  |
| C | 4.87421916319515  | -6.35385066524014 | 2.09363840765902  |
| O | -2.03321912286540 | 3.16219664880329  | 1.64644655827729  |
| O | -1.61477934734329 | 1.12894573977122  | 3.05560171394665  |
| H | -8.14284533934000 | -3.45109009491856 | 1.35440502958865  |
| H | -4.96830550108500 | -4.33585969573417 | -1.38261830086316 |
| C | -4.41213279797314 | -6.37889874083123 | -1.07991283239461 |
| C | -2.67013279249289 | -6.81994082230796 | 0.53247863645254  |
| C | -1.56517476152404 | -4.94718185386906 | 1.69661817845148  |
| C | -0.30586322194733 | -3.12322111089128 | 2.83704580256506  |
| S | 2.25850232327736  | 1.50745946225264  | -2.17669548693115 |
| C | 4.14032408920545  | 0.90484557369202  | 1.97360682896470  |
| C | 6.40800410005815  | 0.17567086394102  | 1.39945127026829  |
| C | 6.81708295680657  | -1.90934256789032 | 0.17181389886009  |
| C | 5.51764412533176  | -5.18385305533184 | 2.55706000226921  |
| H | 5.72352090679005  | -3.06167381715398 | 2.37493686905948  |
| H | 5.11939268722608  | -7.32116227455375 | 2.53440241644141  |
| H | -5.12363341520724 | -6.74886978316793 | -1.81974410029966 |
| C | -3.58316141197115 | -7.28936426811763 | -0.38636214657135 |
| H | -2.01463248950995 | -7.51065469697381 | 1.06721900335323  |
| H | -0.93709952513422 | -5.66813634734018 | 2.22375408447065  |
| C | 0.95370832190384  | -3.74634147407268 | 2.81704736149448  |
| C | -0.50597113024974 | -2.09000645925125 | 3.76289163730548  |
| O | 1.72446326556851  | 0.65621203746863  | -3.23838971348621 |
| O | 2.06107860111138  | 2.96184832252797  | -2.36010768296411 |
| C | 5.51145488284677  | 1.09849029121725  | 1.98937572579912  |
| C | 3.21360336068964  | 1.87195354412812  | 2.60356393475249  |
| C | 7.80512769014135  | 0.42581073774840  | 1.36594793885898  |
| C | 8.16689254268587  | -1.62502089600574 | 0.13810382743715  |



|   |                   |                   |                   |
|---|-------------------|-------------------|-------------------|
| H | 6.43620106811914  | -2.80702933020189 | -0.31407135902544 |
| H | 6.25187764409610  | -5.25118881449399 | 3.36135745319960  |
| H | -3.66304068876204 | -8.35894610421179 | -0.58533001061339 |
| C | 1.95373378817186  | -3.37252748803980 | 3.70707376916589  |
| H | 1.16192266554936  | -4.51591697872541 | 2.07210595177365  |
| C | 0.50117156043984  | -1.72358252004346 | 4.65566826430538  |
| H | -1.45754586526776 | -1.56267745052752 | 3.79805521401438  |
| H | 5.91696171910837  | 1.99164798088910  | 2.46749449606240  |
| C | 2.13277271953111  | 1.43949069968550  | 3.38638824210552  |
| C | 3.41534889704617  | 3.25607920064921  | 2.47669693929314  |
| H | 8.17923017658353  | 1.34681018370896  | 1.81676267052201  |
| C | 8.66910906154755  | -0.45442789428374 | 0.75056015850261  |
| H | 8.84869588498111  | -2.30347722241233 | -0.37652757166999 |
| F | -8.27808373211444 | 1.98458136916380  | -0.02427858600947 |
| C | 1.74905486897023  | -2.36068795128140 | 4.66069138233585  |
| H | 2.91739951528382  | -3.88050223536448 | 3.64657064256870  |
| H | 0.29237676233342  | -0.92168124653599 | 5.36321998721327  |
| C | 1.31087686885669  | 2.35000810344264  | 4.04491367720659  |
| H | 1.92291732626826  | 0.37644262769305  | 3.48982077226678  |
| C | 2.58322646034507  | 4.15937084840296  | 3.13313421843711  |
| H | 4.20859429614527  | 3.63145039222412  | 1.82910699197325  |
| H | 9.73850489155395  | -0.24078661199509 | 0.72031571252837  |
| C | -7.06658095006138 | 2.57225887190366  | 0.13512922663582  |
| C | 2.85372458396849  | -2.01976136858703 | 5.66708359841349  |
| C | 1.52055631438528  | 3.73069404080856  | 3.94696229937830  |
| H | 0.48014980496114  | 1.95907050418964  | 4.62896678065522  |
| H | 2.77302205591213  | 5.22693347595151  | 3.00213656119989  |
| F | -7.29431213810289 | 3.82088306459464  | 0.64327456126346  |
| C | -6.14315914164612 | 1.77704213415445  | 1.01916365040231  |
| F | -6.54478695473120 | 2.76242700994282  | -1.11541882971950 |
| C | 4.14739462412160  | -1.63370202883477 | 4.92349754321792  |
| C | 3.12608694578983  | -3.26803244639949 | 6.53312398887787  |
| C | 2.46328524479660  | -0.85913022750805 | 6.59292474413894  |
| C | 0.64453112691535  | 4.74720776093370  | 4.68860931916790  |
| C | -6.66224528298643 | 0.81989235487298  | 1.89557714229892  |
| C | -4.77642618364131 | 2.05609585393791  | 0.99585932994998  |
| H | 4.48921771680202  | -2.44279646646623 | 4.26511487004601  |
| H | 4.00198181973425  | -0.73498009482806 | 4.30935676181074  |
| H | 4.94922495817408  | -1.42468107019272 | 5.64787606723725  |
| H | 2.22072719316979  | -3.57126039760695 | 7.07876551740197  |
| H | 3.45169845612042  | -4.11847034594736 | 5.91775494750841  |
| H | 3.91783841141555  | -3.05501166775956 | 7.26763487849380  |
| H | 3.28705035250981  | -0.65804064547681 | 7.29309405017058  |
| H | 2.27296847149336  | 0.06569166949527  | 6.02947083798890  |
| H | 1.56978157038995  | -1.09498690228228 | 7.18932431209482  |
| C | 1.53684834664298  | 5.62985542781435  | 5.58382214402469  |
| C | -0.41180336820381 | 4.06496396761785  | 5.57005237680068  |
| C | -0.09513272711097 | 5.63497250714259  | 3.66772990646908  |
| C | -5.79811262703946 | 0.14860033227660  | 2.75915703625653  |
| H | -7.72689749745315 | 0.59592952704760  | 1.89924792832342  |
| C | -3.92753624924664 | 1.36830786663389  | 1.86176845838318  |
| H | -4.37186145274715 | 2.80980944331957  | 0.32067031636448  |
| H | 2.28258161796168  | 6.18273124191204  | 4.99574271404620  |
| H | 0.92291370511795  | 6.36321223269288  | 6.12889156694086  |
| H | 2.07610758848476  | 5.01684780950867  | 6.32022508663515  |
| H | 0.05279995346507  | 3.43141283421116  | 6.33951477663460  |
| H | -1.01106313168688 | 4.83088843399383  | 6.08401064174723  |
| H | -1.09520705856276 | 3.44287912557672  | 4.97472348708293  |

|   |                   |                   |                   |
|---|-------------------|-------------------|-------------------|
| H | -0.69489818829083 | 6.39674380379675  | 4.19013419322001  |
| H | 0.61289415873131  | 6.15687405315712  | 3.00616506635033  |
| H | -0.77154702774401 | 5.01942867253702  | 3.05709337417268  |
| C | -4.42707592747309 | 0.41931266303534  | 2.74866092225071  |
| C | -6.32709797949967 | -0.84403225505481 | 3.76396936919394  |
| H | -3.74372014868613 | -0.09451568627262 | 3.42347933382474  |
| F | -5.60434008268678 | -1.99800685843930 | 3.76478290714790  |
| F | -7.62439477108827 | -1.17499476502172 | 3.53851413830235  |
| F | -6.25836289991305 | -0.34152890397956 | 5.03112218176474  |
| C | 4.88357248564580  | 2.19816463250992  | -1.56598533643929 |
| C | 4.04544639311463  | 1.26510323558778  | -2.17709026574587 |
| H | 4.47621672682933  | 3.07012508160431  | -1.05434491519509 |
| C | 6.26614631870398  | 2.01097519721641  | -1.62993863169588 |
| C | 4.56978638635372  | 0.14749398567538  | -2.82073029015114 |
| C | 6.80911186368422  | 0.88857891814074  | -2.25747074358248 |
| C | 7.16508375226766  | 3.08643925348771  | -1.07320856716236 |
| C | 5.95287277052379  | -0.04425513985914 | -2.84136470882127 |
| H | 3.89598491256927  | -0.55933388830001 | -3.30186674904452 |
| H | 7.88614859354234  | 0.73883066899142  | -2.28185408763721 |
| F | 6.77236429288782  | 3.49673304194994  | 0.16542713420436  |
| F | 7.15356953204422  | 4.19474761830200  | -1.86944224910070 |
| F | 8.46014305950756  | 2.68668151058723  | -0.97416256806997 |
| C | 6.49569787841709  | -1.26345252542696 | -3.54105926204481 |
| F | 7.83041715158147  | -1.42593019873837 | -3.34975510632241 |
| F | 5.88281189739920  | -2.40403464196453 | -3.11218385417416 |
| F | 6.29001397728483  | -1.19811149630965 | -4.88868638536598 |
| H | 2.69170051230690  | 4.18989764809801  | -1.23113948445959 |
| H | 2.69934899343290  | 6.72256790873433  | -1.19297801917880 |
| H | 0.80248933197546  | 5.36712353616585  | -1.96805746083231 |
| H | 0.73047762694225  | 3.82017062356110  | 0.07760504248180  |

228

C-TS2

|   |                   |                   |                   |
|---|-------------------|-------------------|-------------------|
| C | -0.95153073487245 | 4.31938910520483  | -0.66747169331128 |
| C | 0.36603602397297  | 4.52473419208399  | -0.00575032884305 |
| C | 0.97405182270756  | 5.95230031718352  | -0.04329823462844 |
| C | 2.42949457638411  | 5.94472067112743  | -0.48449412634635 |
| O | 2.46076938188640  | 5.64659071334896  | -1.88084852001359 |
| H | 0.22170220284703  | 4.21006037984426  | 1.04575348224125  |
| H | 0.91663381764551  | 6.42242662512774  | 0.94853992159207  |
| H | 2.99376990717822  | 5.19555094082539  | 0.10154486990506  |
| C | -2.06215717916510 | 5.22220539444815  | -0.45927312008763 |
| C | -3.19085412412044 | 5.19021099322233  | -1.31380930162019 |
| C | -2.08046591210765 | 6.10961186307361  | 0.64209429555895  |
| C | -4.29246401752818 | 5.99799046320576  | -1.06515160915018 |
| H | -3.19427993378387 | 4.53317906064546  | -2.18254602813940 |
| C | -3.19048747567375 | 6.90218181645499  | 0.89650017938119  |
| H | -1.23944576242638 | 6.13003049166825  | 1.33026518165932  |
| C | -4.29954043933261 | 6.84876613857370  | 0.04501977474468  |
| H | -5.15655921401788 | 5.95641849615624  | -1.72872743324074 |
| H | -3.20054361590929 | 7.55701926709464  | 1.76848660345605  |
| H | -5.17341511333139 | 7.46957093693608  | 0.24884661553722  |
| C | -1.09028164823127 | 3.14369705657084  | -1.47493952085561 |
| H | -2.00870818157326 | 3.04448128082743  | -2.05514644728284 |
| H | -0.17461970161890 | 2.91958155472371  | -2.04780170214071 |
| H | -3.38457142250058 | -2.35517596849984 | -3.82144286613898 |
| C | -3.50216659144429 | -3.41866617281647 | -4.06760402272193 |
| C | -2.22961807407808 | -3.97424919767606 | -4.73501721241616 |
| H | -4.36237339966076 | -3.51684384909037 | -4.74769498285129 |

|   |                   |                   |                   |
|---|-------------------|-------------------|-------------------|
| H | -3.73568925252489 | -3.95730327665268 | -3.14057910054016 |
| C | -1.06150021299621 | -3.91174661023808 | -3.74477191672520 |
| C | -1.95918676706047 | -3.15919521158761 | -6.00741755967593 |
| C | -2.47026161890741 | -5.44426355896174 | -5.13632382982316 |
| C | -3.94504397077036 | 1.83474452971955  | -3.38443355740085 |
| C | 0.08644040939413  | -3.14352696888347 | -3.97643604033572 |
| C | -1.10890801316732 | -4.64787272096852 | -2.54801243366148 |
| H | -1.82088240098779 | -2.09098066546259 | -5.78492117615323 |
| H | -1.06891754975525 | -3.52077117007701 | -6.54250618588541 |
| H | -2.81867623957740 | -3.24732651538998 | -6.68785232910573 |
| H | -2.72720541634451 | -6.06283016305066 | -4.26516807869502 |
| H | -3.30151151528307 | -5.50921653248075 | -5.85498304882199 |
| H | -1.57353106956663 | -5.87428323735947 | -5.60560451335609 |
| C | -3.36959158318696 | 0.61956888141849  | -2.96305449367821 |
| C | -3.28446723723212 | 2.67927987445964  | -4.27196075176718 |
| H | -4.91583639224680 | 2.13612278835819  | -2.99029904153347 |
| C | 1.14535329836173  | -3.11714496503838 | -3.07009907504884 |
| H | 0.17307484987036  | -2.54284585728932 | -4.88109376641123 |
| C | -0.05459990602291 | -4.62933344483438 | -1.64101772087841 |
| H | -1.99237636661908 | -5.24096498185578 | -2.30576931219321 |
| C | -4.11271803255658 | -0.27417873867402 | -2.04241102898431 |
| C | -2.10806013438700 | 0.29586648470198  | -3.49348140187603 |
| C | -2.00698910957848 | 2.37279533290662  | -4.77477377384304 |
| H | -3.77306636693291 | 3.61141412205941  | -4.56525886021366 |
| C | 1.10033269273835  | -3.86800972516219 | -1.88766880362325 |
| H | 2.00964842826630  | -2.49444672394322 | -3.29177421255357 |
| H | -0.14271521654521 | -5.18564894767716 | -0.70634844407505 |
| C | -3.46164222234903 | -1.16318993828672 | -1.13523752520647 |
| C | -5.49968528745519 | -0.30893998202449 | -2.05032710014637 |
| C | -1.44599135575251 | 1.15582858018344  | -4.36965659422906 |
| H | -1.61745399726480 | -0.63624941598162 | -3.22330397817465 |
| C | -1.27879732657444 | 3.35649414295459  | -5.69463715231498 |
| C | 2.21934479086563  | -3.87704977690287 | -0.91969994066791 |
| O | -2.07131093873750 | -1.13484270433918 | -1.08783470742113 |
| C | -4.12892557513534 | -2.10074508304928 | -0.35372556709777 |
| H | -6.04672179647472 | 0.32127459062329  | -2.75322715938019 |
| C | -6.24374207957237 | -1.13477295891769 | -1.17756796553858 |
| H | -0.45423636090025 | 0.86304670999978  | -4.71077349102220 |
| C | -1.03390998201050 | 4.67622180260487  | -4.93151865836704 |
| C | -2.15104282922691 | 3.63592682351170  | -6.93503929494686 |
| C | 0.08059115474467  | 2.81392798276620  | -6.15834716209390 |
| C | 2.88646520905128  | -2.68038361756920 | -0.53632780059228 |
| C | 2.64885251717858  | -5.04573692927553 | -0.31453722069871 |
| P | -1.31851349156972 | -0.62193804459194 | 0.25685486028529  |
| C | -5.55848829473412 | -2.04805484469211 | -0.30936337562601 |
| C | -3.35374961405944 | -3.13899139952339 | 0.38117003592517  |
| C | -7.66225169238130 | -1.07779259989943 | -1.13907830096246 |
| H | -0.55110862009027 | 5.40998987941304  | -5.59432475060760 |
| H | -1.97476806530191 | 5.11770744658348  | -4.57107714200017 |
| H | -0.37067098627986 | 4.51282824128817  | -4.07070928455706 |
| H | -2.34324892217590 | 2.70879626733128  | -7.49417457237400 |
| H | -3.12163756157324 | 4.07482678174593  | -6.66358146221280 |
| H | -1.63820907564480 | 4.34208412698748  | -7.60519470963574 |
| H | 0.56090547174098  | 3.55185748449451  | -6.81724892515627 |
| H | 0.75527797554834  | 2.62991553854824  | -5.31056967711696 |
| H | -0.02907162204700 | 1.87912408105858  | -6.72740219399563 |
| O | 2.46129170639095  | -1.48685104250875 | -1.11745608285250 |
| C | 3.92542400629138  | -2.61537071817127 | 0.37902934524551  |

|   |                   |                   |                   |
|---|-------------------|-------------------|-------------------|
| H | 2.17588536778379  | -5.99113107359203 | -0.58878465917531 |
| C | 3.68208320741513  | -5.05721539892565 | 0.65333032213208  |
| O | -2.11830660766963 | -1.39754061770082 | 1.43255008513089  |
| N | 0.13687289144688  | -1.17017436132060 | 0.07640566892949  |
| N | -1.57313161036784 | 0.94476055126817  | 0.50337368386203  |
| C | -6.32440407693697 | -2.83312658764079 | 0.59004445814106  |
| C | -3.55190095146515 | -4.53946161055901 | 0.13794643660970  |
| C | -2.33787511232313 | -2.76600586646779 | 1.24682829188279  |
| H | -8.17375029444785 | -0.38199746191599 | -1.80703629214117 |
| C | -8.37817246423907 | -1.86077197864019 | -0.25946351399708 |
| P | 1.52719790433126  | -0.49863897424823 | -0.23307568567547 |
| C | 4.48909801320420  | -1.29185748069952 | 0.76565100229671  |
| C | 4.34021332864266  | -3.83236115892678 | 1.01509977861958  |
| C | 4.06028378628421  | -6.26327817782186 | 1.30095502979549  |
| S | -2.12962415442314 | 1.63119643034772  | 1.84080269609381  |
| H | -1.10446511524949 | 2.28168096174826  | -0.72533910941477 |
| C | -7.70026595732339 | -2.73788076387759 | 0.61787844089955  |
| H | -5.80880884051025 | -3.50183225494690 | 1.27843968866454  |
| C | -4.49429282378479 | -5.03997838846389 | -0.79803423793624 |
| C | -2.71437732549006 | -5.48159829989990 | 0.82642373783906  |
| C | -1.49427967798224 | -3.67332840976933 | 1.94519727892699  |
| H | -9.46697447902939 | -1.79837696985313 | -0.23060122022459 |
| O | 2.26625192473906  | -0.52687839952127 | 1.21370084785071  |
| N | 1.59435977273979  | 0.94735476379702  | -0.90695968125987 |
| C | 3.64015986168019  | -0.30328881139003 | 1.24909768318418  |
| C | 5.88601610315747  | -0.98981800928303 | 0.67446831622782  |
| C | 5.32923268010242  | -3.87726833646581 | 2.03207826638748  |
| H | 3.55519218244755  | -7.18732163378573 | 1.01135148104917  |
| C | 5.02810821304159  | -6.27182104599656 | 2.28188072259843  |
| O | -1.92750074008769 | 3.07517846866046  | 1.68086872942519  |
| O | -1.67100089657032 | 1.00978642570128  | 3.07840556034542  |
| H | -8.26843830457420 | -3.33417630455851 | 1.33283645407250  |
| H | -5.12526620280922 | -4.34068578628838 | -1.34325876346655 |
| C | -4.61458405659459 | -6.39422296564154 | -1.03554432493133 |
| C | -2.87595278460616 | -6.86916169747484 | 0.57016116220021  |
| C | -1.71996161331916 | -5.02097972432075 | 1.72182249149556  |
| C | -0.40975851580746 | -3.21381661742557 | 2.84086390572204  |
| S | 2.07762919333751  | 1.22774702202537  | -2.40748234434215 |
| C | 4.08849437556478  | 0.91776090195580  | 1.82888716178167  |
| C | 6.36154823053596  | 0.25991027965169  | 1.19675877292976  |
| C | 6.81353955040808  | -1.85520365192737 | 0.04003739905060  |
| C | 5.66250879121779  | -5.06463966431907 | 2.65191129523943  |
| H | 5.82519131917619  | -2.95544371432002 | 2.33057385467439  |
| H | 5.30155131597821  | -7.20483352440857 | 2.77661400513352  |
| H | -5.33932741253862 | -6.75004230058905 | -1.76938196351446 |
| C | -3.80375107850730 | -7.32107513213675 | -0.34276086894305 |
| H | -2.23509117382418 | -7.57298746715261 | 1.10554748568463  |
| H | -1.10777977735088 | -5.75559531729413 | 2.24909838507362  |
| C | 0.84785546070427  | -3.83996248911068 | 2.80113944465061  |
| C | -0.59040512897489 | -2.17380514449796 | 3.76269980459353  |
| O | 1.73723655547322  | 0.18371880794128  | -3.37286867460411 |
| O | 1.69297818322198  | 2.60464013734645  | -2.73898202837058 |
| C | 5.45192035501033  | 1.15824380748002  | 1.80206917942687  |
| C | 3.15316284713818  | 1.85414364449376  | 2.49195054288567  |
| C | 7.74310163104802  | 0.57081249179426  | 1.09314187553706  |
| C | 8.14718556405401  | -1.51567374942427 | -0.05863160793033 |
| H | 6.45429881070442  | -2.78894915459716 | -0.39154361476997 |
| H | 6.41937599328523  | -5.06851347270958 | 3.43780040758117  |

|   |                   |                   |                   |
|---|-------------------|-------------------|-------------------|
| H | -3.90947878057347 | -8.38929971949240 | -0.53688650858579 |
| C | 1.86836005108486  | -3.45656904125868 | 3.66444415480313  |
| H | 1.03903208005802  | -4.61637476649529 | 2.05853813277499  |
| C | 0.43602460889698  | -1.79854637947616 | 4.62904784813497  |
| H | -1.54028655348125 | -1.64466271439245 | 3.81235436434176  |
| H | 5.84312488031926  | 2.06709220576743  | 2.26137175057154  |
| C | 2.07819774269178  | 1.38760799118942  | 3.26435689379649  |
| C | 3.35193436573472  | 3.24451260227161  | 2.43289278098379  |
| H | 8.09331295386822  | 1.52343437600235  | 1.49619747601683  |
| C | 8.62029394301337  | -0.29676800891896 | 0.47803246424211  |
| H | 8.83856245254318  | -2.18638739893192 | -0.57012143295062 |
| F | -8.07316692552213 | 2.21264639030196  | -0.38371484725138 |
| C | 1.68476104370676  | -2.43330719745658 | 4.61073772883664  |
| H | 2.83147216506969  | -3.96405712212285 | 3.58784564496938  |
| H | 0.24210254942288  | -0.98991042763956 | 5.33307745148518  |
| C | 1.26337054276595  | 2.26608381249273  | 3.97259750354986  |
| H | 1.86966911428230  | 0.32163235557739  | 3.32746954236123  |
| C | 2.52696795915011  | 4.11779295990130  | 3.13877578567811  |
| H | 4.16425020562776  | 3.64584667912992  | 1.82365329366030  |
| H | 9.67765967852372  | -0.04105835974454 | 0.39488122381015  |
| C | -6.90439984357469 | 2.81207979936043  | -0.03842582003098 |
| C | 2.81341028278729  | -2.07235181772868 | 5.58308947133146  |
| C | 1.47175091775427  | 3.64958323076281  | 3.94195073811571  |
| H | 0.43921732098225  | 1.84598959570752  | 4.54517837317208  |
| H | 2.72103761713651  | 5.19043517851695  | 3.06647452816009  |
| F | -7.23055211945486 | 3.99847101902225  | 0.55686534837518  |
| C | -6.06010735064239 | 1.95505669241945  | 0.86680795321091  |
| F | -6.25908212138386 | 3.13203945916732  | -1.19862056346527 |
| C | 4.07228028571795  | -1.65634201956779 | 4.79768993319222  |
| C | 3.14287307878326  | -3.31509954364807 | 6.43679565240833  |
| C | 2.42837593203489  | -0.92219807925185 | 6.52412273899824  |
| C | 0.60395815898787  | 4.62443479693399  | 4.74477488514244  |
| C | -6.67831166670420 | 1.04741335548398  | 1.73313681811592  |
| C | -4.67714173041734 | 2.13072618497808  | 0.88673524977270  |
| H | 4.40472545064159  | -2.45440924188008 | 4.12198543681258  |
| H | 3.88748729400430  | -0.75677736753137 | 4.19536117121853  |
| H | 4.89555896138170  | -1.43581220517346 | 5.49433659476860  |
| H | 2.26250448787765  | -3.64170515668099 | 7.00915765762010  |
| H | 3.47110763743667  | -4.15593541316024 | 5.80987438250314  |
| H | 3.95127015427630  | -3.08370425275306 | 7.14722116641765  |
| H | 3.26840700804221  | -0.70751207533233 | 7.20055995657715  |
| H | 2.20455760060802  | 0.00055420347503  | 5.96946849627012  |
| H | 1.55675329772342  | -1.17616816687372 | 7.14496747481056  |
| C | 1.50464298201882  | 5.48108121260209  | 5.65641191243082  |
| C | -0.42617264875115 | 3.89431069626555  | 5.61893401308394  |
| C | -0.16506614451523 | 5.53960276331361  | 3.77244624090129  |
| C | -5.89668468346253 | 0.31866408005449  | 2.62727777020087  |
| H | -7.75711133266412 | 0.90676069070087  | 1.70558590911168  |
| C | -3.91174647215650 | 1.38660103572326  | 1.78502927100122  |
| H | -4.19439745837593 | 2.84640892325946  | 0.22166366881944  |
| H | 2.23155829799857  | 6.06789034261941  | 5.07759597044137  |
| H | 0.89271878784414  | 6.18402942202992  | 6.24185683817623  |
| H | 2.06537964006735  | 4.84651934298101  | 6.35764318215234  |
| H | 0.06079350950512  | 3.23166130660091  | 6.34909760058021  |
| H | -1.01863674920974 | 4.63219396101652  | 6.17933606835583  |
| H | -1.11932851273053 | 3.29349892339084  | 5.01322263893105  |
| H | -0.77613312915722 | 6.26544872288404  | 4.33121262423923  |
| H | 0.52566161739620  | 6.10558523305922  | 3.12952186314247  |

|   |                   |                   |                   |
|---|-------------------|-------------------|-------------------|
| H | -0.83344403337570 | 4.93650828011765  | 3.14157487270432  |
| C | -4.50850767650160 | 0.48299393275817  | 2.65791579686005  |
| C | -6.53500403741522 | -0.60881626204032 | 3.63064467327328  |
| H | -3.88763879486834 | -0.07489406940920 | 3.35772511972881  |
| F | -5.88221432760741 | -1.80042919761323 | 3.70925628551297  |
| F | -7.83593069803686 | -0.87221890608016 | 3.34547608072704  |
| F | -6.50510216284939 | -0.06622913204447 | 4.88367999255405  |
| C | 4.47644083758819  | 2.38770546082088  | -1.72684576983508 |
| C | 3.87389818028593  | 1.27790579328124  | -2.31523963529258 |
| H | 3.84954628876627  | 3.17612684273246  | -1.30977897757764 |
| C | 5.86734520062240  | 2.48554652517866  | -1.71644420570657 |
| C | 4.64087133952475  | 0.26302103826933  | -2.87793400092593 |
| C | 6.65616139087817  | 1.47530035092649  | -2.27324159138244 |
| C | 6.49183989525809  | 3.72213542854955  | -1.12914410890439 |
| C | 6.03492482497723  | 0.36809555948982  | -2.85167835988449 |
| H | 4.14474004948490  | -0.58572891417279 | -3.34735082547205 |
| H | 7.74102501738755  | 1.55373903321759  | -2.26290468828968 |
| F | 7.82940739684792  | 3.78419297272734  | -1.32727025541597 |
| F | 6.28191782301699  | 3.82313299280393  | 0.21803794808605  |
| F | 5.94893544503855  | 4.85797823123307  | -1.67595675154604 |
| C | 6.85153295146284  | -0.69383398303685 | -3.54413746207600 |
| F | 8.16987928678810  | -0.63314079866598 | -3.22230890712122 |
| F | 6.41426348524685  | -1.94789773866826 | -3.24707681021236 |
| F | 6.76966078461255  | -0.56564896015060 | -4.90152999579094 |
| H | 3.37170612752021  | 5.41574669352694  | -2.13064283247754 |
| H | 2.87565488625239  | 6.93727899888703  | -0.28217140010901 |
| H | 0.41513357182311  | 6.59910598099362  | -0.73578383965465 |
| H | 1.07000064308890  | 3.80139403995027  | -0.43703582588257 |

228

C-P

|   |                   |                   |                   |
|---|-------------------|-------------------|-------------------|
| C | -0.48816940433592 | 4.54800353640017  | -0.82300777767767 |
| C | 0.30651041630125  | 4.24169038693045  | 0.44125990015264  |
| C | 1.40799898155472  | 5.31031539130750  | 0.44927081033106  |
| C | 1.73340175607608  | 5.53516549800805  | -1.02885137181888 |
| O | 0.67029514668492  | 4.82832002271685  | -1.79702617694667 |
| H | -0.32506010114260 | 4.26152854474042  | 1.33393241782899  |
| H | 2.28419580793434  | 4.97658146961408  | 1.01573569471659  |
| H | 2.67545469154575  | 5.08471154432986  | -1.36130067036727 |
| C | -1.30519074742387 | 5.82604469982548  | -0.74554297315779 |
| C | -2.17068971389700 | 6.00840539852897  | 0.34250353078176  |
| C | -1.27592763569869 | 6.78929554688653  | -1.76132617331001 |
| C | -2.97585678173722 | 7.14503476391100  | 0.41754777117591  |
| H | -2.23924927280421 | 5.24317621137458  | 1.11684790426637  |
| C | -2.07821483600379 | 7.92932981593626  | -1.67883571091416 |
| H | -0.62929116086169 | 6.64566927459389  | -2.62714888631980 |
| C | -2.92799621887856 | 8.11318885532977  | -0.58769107295778 |
| H | -3.64708610588346 | 7.27061904516720  | 1.26849663254010  |
| H | -2.04077054939997 | 8.67301061150216  | -2.47652463674233 |
| H | -3.55602193248136 | 9.00298975429163  | -0.52426978754425 |
| C | -1.28832923412650 | 3.41084073970780  | -1.41083607286913 |
| H | -1.71494417084819 | 3.68618328192346  | -2.38099235520767 |
| H | -0.69181377372235 | 2.49613375667124  | -1.50092244884271 |
| H | -3.58669631530235 | -2.39471739162606 | -3.89521037358457 |
| C | -3.56246847279183 | -3.41709986502240 | -4.29481386131476 |
| C | -2.20798770815969 | -3.72342486776710 | -4.96298241689445 |
| H | -4.37540064443440 | -3.51442246395921 | -5.03034069129742 |
| H | -3.76995909384412 | -4.10917018025495 | -3.46836929552257 |
| C | -1.07939916706600 | -3.63538438106023 | -3.92996706919940 |

|   |                   |                   |                   |
|---|-------------------|-------------------|-------------------|
| C | -2.01205277952169 | -2.74299572738381 | -6.12793584018165 |
| C | -2.24013429243929 | -5.15908756806027 | -5.52851160287059 |
| C | -4.10067812130279 | 1.79666270954176  | -3.24601956431403 |
| C | 0.04109830832072  | -2.81096738064731 | -4.09605850745637 |
| C | -1.12416148415463 | -4.42636165168663 | -2.76920086413031 |
| H | -1.99502859070120 | -1.69895337202603 | -5.78310434509622 |
| H | -1.08195144011070 | -2.94382144026769 | -6.67945549900354 |
| H | -2.84714495824857 | -2.84575875390696 | -6.83600404575269 |
| H | -2.42168941758058 | -5.89693391657470 | -4.73446191845526 |
| H | -3.04358896120946 | -5.25561383547566 | -6.27476919739798 |
| H | -1.28572670372867 | -5.41067902539628 | -6.01339764532664 |
| C | -3.49657869189638 | 0.56909692552974  | -2.91719225294292 |
| C | -3.51242155914295 | 2.66688511835069  | -4.15867825616354 |
| H | -5.03872150093939 | 2.08052558535815  | -2.76584646237502 |
| C | 1.07860129315497  | -2.78791134518974 | -3.16417085573666 |
| H | 0.12369398135780  | -2.16704656488994 | -4.97108244871219 |
| C | -0.09431286781569 | -4.40796974039453 | -1.83587198866277 |
| H | -1.98565870868185 | -5.06755569546688 | -2.57710646204390 |
| C | -4.18361591266900 | -0.38838260441686 | -2.01928667942412 |
| C | -2.26764852590188 | 0.27306937317531  | -3.52933163445849 |
| C | -2.28743732304697 | 2.36842449221133  | -4.78104264638633 |
| H | -4.01841859343291 | 3.60921593043835  | -4.37844429011515 |
| C | 1.03822927179859  | -3.59660203145738 | -2.02031060433489 |
| H | 1.92681436132595  | -2.12953517181793 | -3.34010268896117 |
| H | -0.18260006565596 | -5.01054787528229 | -0.93070007795371 |
| C | -3.47423882384390 | -1.26400029377571 | -1.14688951861227 |
| C | -5.56412145025998 | -0.51141298068371 | -2.03248413971507 |
| C | -1.68065138694080 | 1.15488985244886  | -4.43585397638998 |
| H | -1.75475448112262 | -0.66058369915298 | -3.30829135163465 |
| C | -1.66989560249440 | 3.34576044334922  | -5.78735796077492 |
| C | 2.14123720642264  | -3.64307033588786 | -1.03549498401426 |
| O | -2.08812367449888 | -1.13707151725085 | -1.09440121931672 |
| C | -4.07454580642245 | -2.26569152844736 | -0.39302579310743 |
| H | -6.14921900345560 | 0.11253330493067  | -2.70963835240251 |
| C | -6.25023082592532 | -1.41924256322662 | -1.19311456912058 |
| H | -0.71872409131579 | 0.87695944660190  | -4.86408340130031 |
| C | -1.40311679832768 | 4.70218269147550  | -5.10301443756259 |
| C | -2.65574229524464 | 3.55146572772318  | -6.95552964143387 |
| C | -0.33991631963949 | 2.82812287516229  | -6.35355786857426 |
| C | 2.81053217769755  | -2.47476586473102 | -0.57826230475954 |
| C | 2.55686483678726  | -4.84489164506966 | -0.48645097927333 |
| P | -1.41899151575879 | -0.55974065284228 | 0.26699085835421  |
| C | -5.50544830563642 | -2.31298120135482 | -0.35328285270072 |
| C | -3.23003539647778 | -3.26102050051405 | 0.32343368575531  |
| C | -7.66910102367513 | -1.46163605836099 | -1.15964399967847 |
| H | -1.02715243623374 | 5.42892747179832  | -5.83936170361404 |
| H | -2.31263546407668 | 5.11993651405485  | -4.64884170749975 |
| H | -0.64498051144229 | 4.59662651832544  | -4.31425358432525 |
| H | -2.86655830733312 | 2.59725430788873  | -7.45940536711799 |
| H | -3.61168450122287 | 3.96951806043329  | -6.61065458838227 |
| H | -2.22912215470450 | 4.24576993781944  | -7.69536532929878 |
| H | 0.06803717841012  | 3.56374578608625  | -7.06200263647376 |
| H | 0.40738817766074  | 2.67155259011557  | -5.56211762412836 |
| H | -0.47115003137696 | 1.88018950365577  | -6.89522417181185 |
| O | 2.41549856241336  | -1.24378411367608 | -1.11261480853092 |
| C | 3.82594379423836  | -2.46515126707990 | 0.36488566377892  |
| H | 2.08756547611496  | -5.77124416140655 | -0.82362106055464 |
| C | 3.56565433946681  | -4.91588595043802 | 0.50276507237065  |

|   |                    |                   |                   |
|---|--------------------|-------------------|-------------------|
| O | -2.11540336239696  | -1.46471385270142 | 1.41814970422170  |
| N | 0.09132126054519   | -0.95839369029810 | 0.07748441410617  |
| N | -1.82944419842712  | 0.95212748937275  | 0.53342865864235  |
| C | -6.21818728313158  | -3.17627269503288 | 0.51768424789558  |
| C | -3.33987941361988  | -4.66728948808433 | 0.06155799423714  |
| C | -2.24523870101752  | -2.83612251801568 | 1.20217032771359  |
| H | -8.22551834145506  | -0.77888700645508 | -1.80466665012859 |
| C | -8.33207832379909  | -2.32092195500138 | -0.31017097847267 |
| P | 1.47396396589315   | -0.29777386647652 | -0.19355770705877 |
| C | 4.41487888413876   | -1.17741044933382 | 0.82385444823938  |
| C | 4.21390382294983   | -3.71619127340191 | 0.95236457607546  |
| C | 3.92504997722737   | -6.15965113818990 | 1.08734333031419  |
| S | -2.38328291694833  | 1.55409409985042  | 1.90823009674401  |
| H | -2.10652836021693  | 3.18942970878077  | -0.71718373167549 |
| C | -7.59767349779702  | -3.17644916932057 | 0.54235280657956  |
| H | -5.66051013869884  | -3.82880643238240 | 1.18830922367801  |
| C | -4.23640238920836  | -5.20992237348884 | -0.89600529312586 |
| C | -2.46268833997099  | -5.56777470086423 | 0.75585157103588  |
| C | -1.36181748969442  | -3.70229240997489 | 1.90501490670922  |
| H | -9.42265476658277  | -2.33283550588997 | -0.28398688231733 |
| O | 2.21436439226031   | -0.34191582579251 | 1.24498521167015  |
| N | 1.58099828928940   | 1.18044684615179  | -0.84519377088023 |
| C | 3.59396984812291   | -0.17470985922648 | 1.32948259897323  |
| C | 5.82783306731315   | -0.94646591360117 | 0.80605241188602  |
| C | 5.16699976337731   | -3.82239324476526 | 1.99881189155605  |
| H | 3.42804574484543   | -7.06353468086757 | 0.72864008646977  |
| C | 4.86343398539430   | -6.22788064751508 | 2.09363452096191  |
| O | -2.41236053986388  | 3.01268499743006  | 1.76427201078043  |
| O | -1.75023221325337  | 1.00332292292733  | 3.10621864729874  |
| H | -8.12463949781101  | -3.83300806534305 | 1.23588084167282  |
| H | -4.89149394222971  | -4.53931176314513 | -1.44902477767762 |
| C | -4.281711165418562 | -6.56695958116036 | -1.14296432263725 |
| C | -2.54741671360014  | -6.96057493765100 | 0.48967332142880  |
| C | -1.50912133527287  | -5.05931180066553 | 1.66949097322867  |
| C | -0.32370207291083  | -3.19133944933888 | 2.82732738700697  |
| S | 2.12490965571034   | 1.44646304015942  | -2.30352590678895 |
| C | 4.07578895740956   | 0.98396619190055  | 2.00902515425713  |
| C | 6.34395671593640   | 0.22533043794304  | 1.45167793112226  |
| C | 6.73540794031497   | -1.81229911441320 | 0.14366938191468  |
| C | 5.48220833174576   | -5.04473767977491 | 2.55634204184263  |
| H | 5.64849614301506   | -2.92117211806176 | 2.37281244303555  |
| H | 5.12376410589066   | -7.18901548451735 | 2.53904769601955  |
| H | -4.97423106103950  | -6.95573877382380 | -1.89114634172707 |
| C | -3.43618976798263  | -7.45470598399965 | -0.43997010239102 |
| H | -1.87965401078404  | -7.63338443193164 | 1.03216003010082  |
| H | -0.86892542166395  | -5.76368334248023 | 2.20453871331062  |
| C | 0.95298679122187   | -3.77859115595807 | 2.84275769207572  |
| C | -0.56560157056421  | -2.14168137640496 | 3.72488766605526  |
| O | 1.65267051630744   | 0.56342545313880  | -3.35907119113280 |
| O | 1.94012071280006   | 2.90797825109967  | -2.58988219788524 |
| C | 5.45391217725221   | 1.12968533037249  | 2.07438055622481  |
| C | 3.17653758176716   | 1.95996970241117  | 2.67029820334754  |
| C | 7.74596187759243   | 0.45236606099956  | 1.45091166349481  |
| C | 8.08979314852339   | -1.54914233319167 | 0.13914611626915  |
| H | 6.34673245555478   | -2.68436990169913 | -0.38095500758701 |
| H | 6.21159316447789   | -5.09522146162802 | 3.36622114470238  |
| H | -3.48442228529046  | -8.52606281021035 | -0.63971368040398 |
| C | 1.93172709935308   | -3.34797176293464 | 3.73176200874840  |



|   |                   |                   |                   |
|---|-------------------|-------------------|-------------------|
| H | 1.19197414140279  | -4.56525635468511 | 2.12553118744038  |
| C | 0.42119636327436  | -1.71387002455828 | 4.61201433962825  |
| H | -1.53155321801670 | -1.64199563720801 | 3.73756174361438  |
| H | 5.87676788173462  | 1.97132067117189  | 2.62420788349229  |
| C | 1.94021793922589  | 1.59722538564182  | 3.23228017233209  |
| C | 3.57619375874257  | 3.30255898739894  | 2.82017410659134  |
| H | 8.12940510655767  | 1.34360418703688  | 1.95143229495188  |
| C | 8.60333027441142  | -0.41423798938161 | 0.80795621060838  |
| H | 8.76768756615527  | -2.21734255815132 | -0.39354400636989 |
| F | -8.58429509364364 | 1.40840744626219  | 0.30032056512260  |
| C | 1.68884055667775  | -2.30869184655202 | 4.64619189463796  |
| H | 2.90968559712378  | -3.83053937091514 | 3.69871767527407  |
| H | 0.17977475369443  | -0.89504514462016 | 5.28879777186911  |
| C | 1.14365998811990  | 2.52901843397905  | 3.89624101644774  |
| H | 1.58061287192989  | 0.57374091006493  | 3.16556032485944  |
| C | 2.78656887872349  | 4.21993129138662  | 3.50710995760430  |
| H | 4.51795519898431  | 3.63763021177094  | 2.38132559144248  |
| H | 9.67691230484662  | -0.22047685579268 | 0.80361387659897  |
| C | -7.38989546033968 | 2.04878518194220  | 0.38043348865163  |
| C | 2.77485048753509  | -1.89018622839386 | 5.64323012083923  |
| C | 1.54344767684450  | 3.86057096468219  | 4.05694069515272  |
| H | 0.18171369500477  | 2.18821857654327  | 4.27504870691141  |
| H | 3.14685690510719  | 5.24642882596539  | 3.60350196085744  |
| F | -7.63646686010339 | 3.28544538977164  | 0.90318306874387  |
| C | -6.37951491873467 | 1.29690382863300  | 1.20726644887913  |
| F | -6.95607159303418 | 2.25342693892123  | -0.89848223544953 |
| C | 4.05716262942704  | -1.49047999021188 | 4.88835423022744  |
| C | 3.08474834924508  | -3.08940936476247 | 6.56361465962218  |
| C | 2.34084285264801  | -0.70303175591911 | 6.51450193081528  |
| C | 0.69872614757281  | 4.88665091505604  | 4.81896545101852  |
| C | -6.78929574789706 | 0.27318738975096  | 2.06518798722354  |
| C | -5.04027389444943 | 1.68501747263413  | 1.14866123399055  |
| H | 4.42884594266950  | -2.31224236109448 | 4.26254415676118  |
| H | 3.87939625933532  | -0.62292743268443 | 4.23927429892675  |
| H | 4.84939745787294  | -1.22385206967656 | 5.60447767871310  |
| H | 2.18739346077518  | -3.39865809035588 | 7.11882742701830  |
| H | 3.44071400528548  | -3.95473048918666 | 5.98697192033595  |
| H | 3.86562230252629  | -2.81889482401363 | 7.29090434379693  |
| H | 3.15482916662317  | -0.44002116695035 | 7.20569059295511  |
| H | 2.11789295514163  | 0.18644180453972  | 5.90742619485978  |
| H | 1.45453086332832  | -0.94253449381537 | 7.11983768166027  |
| C | 1.47410854685428  | 5.31753865251748  | 6.08161870240014  |
| C | -0.66043781197462 | 4.31150310166295  | 5.24349661694580  |
| C | 0.43985850336059  | 6.12627812312309  | 3.93966519987227  |
| C | -5.84444436530181 | -0.35373774415319 | 2.87636130826781  |
| H | -7.83162651283698 | -0.03678325550503 | 2.09339103276940  |
| C | -4.11034706037620 | 1.04627379767359  | 1.96812109168391  |
| H | -4.71858719830333 | 2.48586441142554  | 0.48277846072978  |
| H | 2.43939389274155  | 5.77682379894709  | 5.82484763893062  |
| H | 0.88884133030795  | 6.05205584480209  | 6.65546263050185  |
| H | 1.67312828843528  | 4.45229625641775  | 6.73013638933760  |
| H | -0.54611297516008 | 3.46770677869812  | 5.93883696764856  |
| H | -1.24129788950526 | 5.09005778838086  | 5.75913842202576  |
| H | -1.24638311162182 | 3.96518316749364  | 4.37975001406114  |
| H | -0.12148591720898 | 6.88063336197389  | 4.51092002468111  |
| H | 1.37516636109362  | 6.59217210660692  | 3.59914246396765  |
| H | -0.15636959917678 | 5.86290757715831  | 3.05472557202942  |
| C | -4.50234366108499 | 0.03336985349314  | 2.83774769057572  |

|   |                   |                   |                   |
|---|-------------------|-------------------|-------------------|
| C | -6.25050370815553 | -1.43306825383683 | 3.84674667635516  |
| H | -3.75937108539462 | -0.43838426792738 | 3.47918797353768  |
| F | -5.45143827768940 | -2.53291600867322 | 3.74244383306121  |
| F | -7.53207299055219 | -1.84492044234813 | 3.66717616029416  |
| F | -6.14742932394182 | -1.00205847439480 | 5.13773219051734  |
| C | 4.65763098427953  | 2.25943639176578  | -1.55840525333712 |
| C | 3.91462750058343  | 1.29842931520683  | -2.24165418223265 |
| H | 4.15620990949415  | 3.08274464313218  | -1.05132562713602 |
| C | 6.04842393922696  | 2.15922895369636  | -1.54154070203321 |
| C | 4.53680183612555  | 0.23108416798873  | -2.88034232645176 |
| C | 6.69195746878215  | 1.08918019574504  | -2.16766813095291 |
| C | 6.84578210551319  | 3.27415060453412  | -0.91411012475126 |
| C | 5.92930748833229  | 0.12580619724264  | -2.82643873086427 |
| H | 3.93434032230675  | -0.50264538883179 | -3.41412205470152 |
| H | 7.77586564363721  | 1.00278736261651  | -2.13203781214397 |
| F | 6.30661864291656  | 3.68789549851551  | 0.26952540497134  |
| F | 6.86879537216932  | 4.37218641319021  | -1.72730980386833 |
| F | 8.13426884864167  | 2.93076131923560  | -0.67582027281772 |
| C | 6.58728509154715  | -1.03257463328940 | -3.53468492400320 |
| F | 7.91758511341447  | -1.11211003258433 | -3.27892636022729 |
| F | 6.02994284830390  | -2.22214711154741 | -3.17388852746862 |
| F | 6.44315433686048  | -0.92890523147368 | -4.88663353090472 |
| H | 1.10880031789957  | 3.88007990997137  | -2.10523556601314 |
| H | 1.68832959667662  | 6.58329511982579  | -1.34271388336709 |
| H | 1.03986578049383  | 6.24036064439090  | 0.90076326449706  |
| H | 0.72858908033240  | 3.22987808314206  | 0.36041551600043  |

228

TS1-1

|   |           |           |           |
|---|-----------|-----------|-----------|
| C | 0.954186  | -4.171081 | -0.174685 |
| C | -0.229143 | -4.264120 | 0.735844  |
| C | -0.957058 | -5.616705 | 0.718866  |
| C | -1.756069 | -5.814272 | -0.565051 |
| O | -0.927735 | -5.660601 | -1.720360 |
| H | 0.149875  | -4.073884 | 1.754547  |
| H | -1.643318 | -5.661073 | 1.579062  |
| H | -2.588634 | -5.091851 | -0.599696 |
| C | 2.023372  | -5.174769 | -0.082946 |
| C | 2.750157  | -5.523315 | -1.235735 |
| C | 2.352001  | -5.800537 | 1.134090  |
| C | 3.779188  | -6.458369 | -1.174882 |
| H | 2.476709  | -5.073270 | -2.189029 |
| C | 3.394119  | -6.720903 | 1.197482  |
| H | 1.823048  | -5.521464 | 2.043884  |
| C | 4.109663  | -7.055552 | 0.044045  |
| H | 4.322098  | -6.727123 | -2.082693 |
| H | 3.652953  | -7.178678 | 2.153309  |
| H | 4.921011  | -7.783323 | 0.095715  |
| C | 1.117247  | -3.063159 | -0.994723 |
| H | 1.958299  | -3.035399 | -1.689802 |
| H | 0.215593  | -2.523445 | -1.293692 |
| H | 2.784268  | 5.304498  | -5.192393 |
| C | 2.612879  | 4.488197  | -5.908068 |
| C | 2.519183  | 3.123694  | -5.192966 |
| H | 3.446099  | 4.483804  | -6.627371 |
| H | 1.684815  | 4.707380  | -6.455551 |
| C | 1.350768  | 3.174119  | -4.202585 |
| C | 3.838184  | 2.858455  | -4.441033 |
| C | 2.340034  | 2.028414  | -6.253692 |

|   |           |           |           |
|---|-----------|-----------|-----------|
| C | 2.408096  | -0.730613 | -3.400324 |
| C | 1.369900  | 4.092159  | -3.138952 |
| C | 0.218357  | 2.357187  | -4.316767 |
| H | 4.030929  | 3.626027  | -3.679853 |
| H | 3.819403  | 1.881441  | -3.940489 |
| H | 4.682151  | 2.862265  | -5.147433 |
| H | 1.435404  | 2.189469  | -6.857815 |
| H | 3.201892  | 2.036792  | -6.936621 |
| H | 2.283807  | 1.027517  | -5.801879 |
| C | 3.623415  | -0.959372 | -2.725251 |
| C | 1.853747  | -1.702168 | -4.224771 |
| H | 1.881250  | 0.213905  | -3.282667 |
| C | 0.305472  | 4.200629  | -2.251677 |
| H | 2.236967  | 4.736666  | -2.987575 |
| C | -0.854302 | 2.460983  | -3.430915 |
| H | 0.151872  | 1.618866  | -5.115322 |
| C | 4.266871  | 0.067925  | -1.874758 |
| C | 4.250376  | -2.198729 | -2.929407 |
| C | 2.481685  | -2.940646 | -4.440137 |
| H | 0.892577  | -1.487053 | -4.694253 |
| C | -0.839181 | 3.395879  | -2.385758 |
| H | 0.372992  | 4.904887  | -1.421367 |
| H | -1.707827 | 1.800307  | -3.565591 |
| C | 3.519227  | 0.998163  | -1.097136 |
| C | 5.646948  | 0.195795  | -1.834703 |
| C | 3.697203  | -3.159393 | -3.777351 |
| H | 5.176531  | -2.428729 | -2.400669 |
| C | 1.820982  | -3.982494 | -5.345845 |
| C | -1.976391 | 3.583840  | -1.457215 |
| O | 2.127872  | 0.871620  | -1.110429 |
| C | 4.083851  | 2.051291  | -0.388107 |
| H | 6.260965  | -0.468787 | -2.444071 |
| C | 6.294377  | 1.159606  | -1.028804 |
| H | 4.225657  | -4.104346 | -3.901198 |
| C | 1.605767  | -3.370258 | -6.745530 |
| C | 0.456498  | -4.379495 | -4.744731 |
| C | 2.675542  | -5.248307 | -5.498523 |
| C | -2.720593 | 2.495154  | -0.923814 |
| C | -2.355200 | 4.851295  | -1.044042 |
| P | 1.349177  | 0.460578  | 0.243678  |
| C | 5.511786  | 2.104428  | -0.285448 |
| C | 3.216001  | 3.100875  | 0.210787  |
| C | 7.710646  | 1.211490  | -0.937544 |
| H | 2.563523  | -3.068648 | -7.194369 |
| H | 1.129711  | -4.107322 | -7.409311 |
| H | 0.955838  | -2.485804 | -6.704577 |
| H | -0.198487 | -3.509325 | -4.603171 |
| H | -0.057267 | -5.088178 | -5.411460 |
| H | 0.581065  | -4.870388 | -3.768961 |
| H | 2.826967  | -5.759763 | -4.536250 |
| H | 2.164541  | -5.956001 | -6.166593 |
| H | 3.661270  | -5.027298 | -5.934241 |
| O | -2.374500 | 1.207099  | -1.337670 |
| C | -3.773146 | 2.625537  | -0.029418 |
| H | -1.831972 | 5.719475  | -1.449567 |
| C | -3.396884 | 5.063362  | -0.110935 |
| O | 2.024695  | 1.392234  | 1.371541  |
| N | -0.129392 | 0.816102  | -0.054768 |

|   |           |           |           |
|---|-----------|-----------|-----------|
| N | 1.761509  | -1.052754 | 0.707041  |
| C | 6.183800  | 3.029382  | 0.554049  |
| C | 3.359364  | 4.483378  | -0.146248 |
| C | 2.185716  | 2.753968  | 1.069821  |
| H | 8.296105  | 0.490567  | -1.511261 |
| C | 8.333755  | 2.131198  | -0.122087 |
| P | -1.573727 | 0.247791  | -0.306532 |
| C | -4.456382 | 1.414074  | 0.499647  |
| C | -4.117895 | 3.942354  | 0.422392  |
| C | -3.721427 | 6.372576  | 0.335420  |
| S | 2.299072  | -1.483176 | 2.199772  |
| H | 1.470549  | -2.119631 | -0.081854 |
| C | 7.560861  | 3.039264  | 0.637119  |
| H | 5.597006  | 3.725173  | 1.152208  |
| C | 4.303423  | 4.944406  | -1.100602 |
| C | 2.467726  | 5.440975  | 0.444229  |
| C | 1.282904  | 3.674927  | 1.667810  |
| H | 9.422177  | 2.152731  | -0.051568 |
| O | -2.319964 | 0.525870  | 1.102713  |
| N | -1.786389 | -1.258658 | -0.781752 |
| C | -3.712515 | 0.410129  | 1.107705  |
| C | -5.875625 | 1.242118  | 0.410416  |
| C | -5.103516 | 4.189268  | 1.413924  |
| H | -3.171110 | 7.215794  | -0.087599 |
| C | -4.693949 | 6.577744  | 1.289298  |
| O | 2.291085  | -2.939355 | 2.204185  |
| O | 1.624925  | -0.760164 | 3.266427  |
| H | 8.055816  | 3.745714  | 1.304559  |
| H | 4.967742  | 4.227991  | -1.580132 |
| C | 4.381918  | 6.280162  | -1.437599 |
| C | 2.586850  | 6.810945  | 0.087377  |
| C | 1.465860  | 5.010047  | 1.344928  |
| C | 0.191591  | 3.252907  | 2.572820  |
| S | -2.234912 | -1.708122 | -2.255402 |
| C | -4.278027 | -0.717304 | 1.767180  |
| C | -6.476213 | 0.113994  | 1.062045  |
| C | -6.708345 | 2.116946  | -0.333436 |
| C | -5.383052 | 5.472293  | 1.837914  |
| H | -5.639930 | 3.348410  | 1.849938  |
| H | -4.928106 | 7.587963  | 1.627830  |
| H | 5.110462  | 6.606390  | -2.181355 |
| C | 3.523090  | 7.226379  | -0.833785 |
| H | 1.907288  | 7.528683  | 0.551775  |
| H | 0.812291  | 5.757780  | 1.798337  |
| C | 0.367912  | 2.278172  | 3.564573  |
| C | -1.069899 | 3.864802  | 2.477884  |
| O | -1.614100 | -0.934101 | -3.328730 |
| O | -2.110874 | -3.168027 | -2.313054 |
| C | -5.661105 | -0.813804 | 1.749945  |
| C | -3.460660 | -1.724044 | 2.482507  |
| C | -7.884107 | -0.056886 | 0.989600  |
| C | -8.070585 | 1.909448  | -0.403390 |
| H | -6.256122 | 2.950379  | -0.869229 |
| H | -6.140335 | 5.632917  | 2.606810  |
| H | 3.598210  | 8.280415  | -1.104474 |
| C | -0.668597 | 1.945591  | 4.436391  |
| H | 1.321847  | 1.765829  | 3.667629  |
| C | -2.096580 | 3.531013  | 3.353367  |

|   |           |           |           |
|---|-----------|-----------|-----------|
| H | -1.257083 | 4.593241  | 1.687617  |
| H | -6.144266 | -1.636213 | 2.279165  |
| C | -2.300385 | -1.385350 | 3.204748  |
| C | -3.876967 | -3.063685 | 2.524587  |
| H | -8.330510 | -0.916808 | 1.492524  |
| C | -8.667877 | 0.821632  | 0.273325  |
| H | -8.688866 | 2.583822  | -0.997294 |
| F | 5.439173  | 2.655943  | 3.789567  |
| C | -1.921477 | 2.567774  | 4.361308  |
| H | -0.477906 | 1.183516  | 5.191307  |
| H | -3.058791 | 4.030795  | 3.235408  |
| C | -1.627769 | -2.336886 | 3.963557  |
| H | -1.924255 | -0.364306 | 3.192732  |
| C | -3.204620 | -4.008199 | 3.300983  |
| H | -4.744911 | -3.375670 | 1.940648  |
| H | -9.746597 | 0.670269  | 0.213746  |
| C | 6.207477  | 1.545116  | 3.967616  |
| C | -3.060436 | 2.265664  | 5.340961  |
| C | -2.075553 | -3.665273 | 4.057124  |
| H | -0.732527 | -2.021740 | 4.502584  |
| H | -3.583589 | -5.030021 | 3.315269  |
| F | 6.081451  | 1.191897  | 5.279190  |
| C | 5.779671  | 0.418189  | 3.060588  |
| F | 7.500758  | 1.908104  | 3.775487  |
| C | -2.709073 | 1.130283  | 6.312734  |
| C | -4.332601 | 1.864546  | 4.569139  |
| C | -3.349813 | 3.542492  | 6.158401  |
| C | -1.360582 | -4.650870 | 4.987830  |
| C | 6.718032  | -0.308228 | 2.329124  |
| C | 4.424357  | 0.081270  | 3.012629  |
| H | -3.559087 | 0.949931  | 6.986614  |
| H | -2.499862 | 0.190373  | 5.781560  |
| H | -1.838418 | 1.380012  | 6.936459  |
| H | -4.172042 | 0.948333  | 3.985775  |
| H | -5.157020 | 1.679305  | 5.274216  |
| H | -4.652380 | 2.655107  | 3.877475  |
| H | -3.646316 | 4.375475  | 5.505486  |
| H | -4.167524 | 3.359721  | 6.872274  |
| H | -2.460308 | 3.855405  | 6.724160  |
| C | 0.109959  | -4.817206 | 4.557255  |
| C | -2.022937 | -6.035319 | 4.990412  |
| C | -1.405850 | -4.088448 | 6.424819  |
| C | 6.293080  | -1.382483 | 1.542528  |
| H | 7.770950  | -0.036390 | 2.363832  |
| C | 4.022729  | -0.988570 | 2.220043  |
| H | 3.683494  | 0.632972  | 3.589646  |
| H | 0.632415  | -3.854862 | 4.475936  |
| H | 0.649571  | -5.439536 | 5.287208  |
| H | 0.168997  | -5.318494 | 3.580705  |
| H | -1.479765 | -6.701120 | 5.676460  |
| H | -3.068270 | -5.987477 | 5.328674  |
| H | -2.002526 | -6.499597 | 3.993285  |
| H | -0.914977 | -4.786129 | 7.120100  |
| H | -0.890592 | -3.120923 | 6.495471  |
| H | -2.444596 | -3.944042 | 6.755317  |
| C | 4.943786  | -1.730078 | 1.480029  |
| C | 7.300056  | -2.234053 | 0.810562  |
| H | 4.609408  | -2.576288 | 0.878848  |

|   |           |           |           |
|---|-----------|-----------|-----------|
| F | 8.496145  | -1.610573 | 0.657267  |
| F | 6.863795  | -2.584480 | -0.433388 |
| F | 7.539399  | -3.397697 | 1.479153  |
| C | -4.880812 | -2.274145 | -1.706850 |
| C | -4.003911 | -1.393929 | -2.339036 |
| H | -4.489316 | -3.135812 | -1.166555 |
| C | -6.254803 | -2.046926 | -1.796886 |
| C | -4.479656 | -0.297987 | -3.052105 |
| C | -6.750824 | -0.944451 | -2.496400 |
| C | -7.196387 | -3.052156 | -1.184589 |
| C | -5.856900 | -0.073656 | -3.118635 |
| H | -3.775490 | 0.364013  | -3.553531 |
| H | -7.822093 | -0.763051 | -2.548533 |
| F | -6.817714 | -3.402992 | 0.080560  |
| F | -7.226101 | -4.206886 | -1.909496 |
| F | -8.472914 | -2.597529 | -1.109384 |
| C | -6.351700 | 1.106617  | -3.915178 |
| F | -7.682114 | 1.325978  | -3.754872 |
| F | -5.705093 | 2.255702  | -3.566571 |
| F | -6.133464 | 0.930006  | -5.250128 |
| H | -1.169615 | -4.795344 | -2.111482 |
| H | -2.187532 | -6.829526 | -0.582516 |
| H | -0.233482 | -6.438018 | 0.832519  |
| H | -0.928704 | -3.445667 | 0.511028  |

228

TS1-2

|   |                   |                   |                   |
|---|-------------------|-------------------|-------------------|
| C | -1.93191756467025 | -3.66461720900963 | -2.72970872642533 |
| C | -1.55937882706122 | -3.73633493975201 | -4.18315788481961 |
| C | -1.18688565405374 | -5.11249376484887 | -4.76447368935081 |
| C | -0.04239941282019 | -5.75753576273878 | -4.00223229348784 |
| O | -0.47259106621706 | -6.06827741097993 | -2.67703453357460 |
| H | -2.41815230480997 | -3.33130364806865 | -4.74385278560456 |
| H | -0.87985898012934 | -4.95789516204988 | -5.80887527363320 |
| H | 0.822261988776679 | -5.07208616087625 | -3.98074410812893 |
| C | -3.24155496525666 | -4.15562324919518 | -2.26842323087614 |
| C | -4.06138767627481 | -3.30594383605323 | -1.50307433294773 |
| C | -3.69049420086677 | -5.46118051462159 | -2.53842194656149 |
| C | -5.30254829589425 | -3.73994585677955 | -1.04548805040958 |
| H | -3.73443052593925 | -2.28940298511638 | -1.29608314519639 |
| C | -4.92019324368077 | -5.89963961464379 | -2.05155359122841 |
| H | -3.03455703808634 | -6.15778929900894 | -3.05378142358581 |
| C | -5.73666561947535 | -5.03966596613992 | -1.31387858736856 |
| H | -5.93278134448405 | -3.05646536385025 | -0.47400268270232 |
| H | -5.23814199947743 | -6.92539347969601 | -2.24411913925416 |
| H | -6.70434889904949 | -5.38327779295388 | -0.94491033351324 |
| C | -1.12154953422414 | -2.94376124134456 | -1.86553784862339 |
| H | -1.35171169867315 | -2.94697693634415 | -0.79803600952000 |
| H | -0.05514404281522 | -2.90509777090495 | -2.12803508985947 |
| H | -0.32500779304170 | 2.21671567008305  | 4.79770292722332  |
| C | 0.20560807421875  | 2.09022039151023  | 3.84193899136632  |
| C | 1.57363657409311  | 1.42336663542583  | 4.08492572030041  |
| H | 0.31229203932717  | 3.08269853349614  | 3.38356101955194  |
| H | -0.42352129138608 | 1.47894184871661  | 3.18181446701758  |
| C | 2.33834131203005  | 1.28561420968752  | 2.76417530460630  |
| C | 1.33479126517787  | 0.06755274663598  | 4.76429281169456  |
| C | 2.40535744169150  | 2.31175102472512  | 5.03452267858059  |
| C | -0.51942929677930 | -1.25204364862769 | 1.53639048214266  |
| C | 2.87667910026479  | 0.07136532482243  | 2.31788220665750  |

|   |                   |                   |                   |
|---|-------------------|-------------------|-------------------|
| C | 2.55988224542823  | 2.41494636579034  | 1.95887232889628  |
| H | 2.27962854837425  | -0.43168730341618 | 5.02361029735879  |
| H | 0.77365238906538  | 0.21980182373240  | 5.69764971039156  |
| H | 0.74689731713471  | -0.60899141093719 | 4.12707487644183  |
| H | 1.88299910612910  | 2.43438807640338  | 5.99569060666653  |
| H | 3.38911554516910  | 1.86129690601857  | 5.23065963405069  |
| H | 2.56987383782519  | 3.31001524143604  | 4.60473589145840  |
| C | -1.77101152203231 | -0.65426425351804 | 1.31523097227014  |
| C | -0.40661154768837 | -2.61872323089274 | 1.78867652513184  |
| H | 0.38785501115262  | -0.65190067377341 | 1.50424854344687  |
| C | 3.61887364096163  | -0.01397197928774 | 1.13994463863039  |
| H | 2.72665889482611  | -0.84058741128449 | 2.89491297021577  |
| C | 3.29819892874059  | 2.33873452195001  | 0.78398112653786  |
| H | 2.14484859382528  | 3.38168280488494  | 2.24596710998159  |
| C | -1.92421669026309 | 0.78954331125384  | 1.03130166937453  |
| C | -2.90468793444035 | -1.48395726260050 | 1.37843396286569  |
| C | -1.53225240046300 | -3.45213062006722 | 1.83784966566809  |
| H | 0.59225164368237  | -3.03403878761630 | 1.91288311601603  |
| C | 3.85940041561422  | 1.12362648950584  | 0.35551278139537  |
| H | 4.01188582796283  | -0.98280461789916 | 0.83994326584800  |
| H | 3.42469218412696  | 3.23444036883366  | 0.17432876265469  |
| C | -0.99878387949167 | 1.49890800611871  | 0.21670740241224  |
| C | -2.99534783840269 | 1.51536952947750  | 1.52464967839400  |
| C | -2.78475590644397 | -2.84524110674955 | 1.63939495978869  |
| H | -3.88985046682329 | -1.05863450258082 | 1.17743626145406  |
| C | -1.43719516426058 | -4.96202302664132 | 2.07463928008830  |
| C | 4.71816075684439  | 1.09892186585191  | -0.84903629226525 |
| O | 0.06141003990453  | 0.76735164099261  | -0.33406797722990 |
| C | -1.07440139848782 | 2.85800773743812  | -0.05370241880468 |
| H | -3.71616256455839 | 1.02166108238591  | 2.17898826770797  |
| C | -3.20935779785056 | 2.87098426678106  | 1.18394624997221  |
| H | -3.68887200590694 | -3.45569734587837 | 1.65100118832395  |
| C | -2.06853001568610 | -5.70984746568022 | 0.88204775088811  |
| C | -2.20712310305657 | -5.31525172920857 | 3.36366760619794  |
| C | 0.01652914081369  | -5.43243906247495 | 2.22351124365535  |
| C | 4.69925227472958  | 0.03183388319278  | -1.79003391318532 |
| C | 5.59983741570350  | 2.13663415278168  | -1.10850145561886 |
| P | 0.06958460164142  | 0.50437309257899  | -1.92679119811618 |
| C | -2.24886043589684 | 3.56046596388091  | 0.37119064887450  |
| C | 0.04458849500992  | 3.54369302418563  | -0.75259188596379 |
| C | -4.37103060150580 | 3.56453074765511  | 1.61461051188991  |
| H | -1.52508806775358 | -5.50176779355342 | -0.04958126134734 |
| H | -2.03088280540225 | -6.79532467115923 | 1.05857207548324  |
| H | -3.11964737565057 | -5.42903259710417 | 0.72862455476874  |
| H | -2.15513587636400 | -6.39871354408915 | 3.54946845878888  |
| H | -1.77653541642067 | -4.79548120983641 | 4.23203722147793  |
| H | -3.26758129557399 | -5.03505510485387 | 3.29206669757079  |
| H | 0.03220630609124  | -6.52036681664402 | 2.38281692345548  |
| H | 0.61067980187685  | -5.21680476299151 | 1.32422194057757  |
| H | 0.51061812287772  | -4.96222804410444 | 3.08654975518901  |
| O | 3.83306479182026  | -1.03479901876497 | -1.54535686804297 |
| C | 5.50946419149332  | -0.03379894727329 | -2.91418579430632 |
| H | 5.66977789240211  | 2.96158281713014  | -0.39696045970344 |
| C | 6.41822245274093  | 2.16557800764481  | -2.26141271582327 |
| O | -0.13367096260293 | 1.97577211914020  | -2.55109356168980 |
| N | 1.45704858559626  | -0.10838741829765 | -2.22642394914968 |
| N | -1.19896759808947 | -0.32307756690571 | -2.53643736192467 |
| C | -2.52638020724092 | 4.89460165963714  | -0.02424044190500 |

|   |                   |                   |                    |
|---|-------------------|-------------------|--------------------|
| C | 0.72134974310189  | 4.65899409680914  | -0.15382532226658  |
| C | 0.51804099006996  | 3.07163055761676  | -1.96712932462052  |
| H | -5.08958386264253 | 3.03470958493501  | 2.24342325436740   |
| C | -4.60382068432732 | 4.86663532345740  | 1.22800054492238   |
| P | 2.51706453762147  | -1.23303085577206 | -2.46989121441569  |
| C | 5.42346996713568  | -1.19815153657060 | -3.83493269507879  |
| C | 6.37617569647595  | 1.07437664258062  | -3.19257801318340  |
| C | 7.26582034161039  | 3.27386951791917  | -2.52942087926621  |
| S | -2.73273496598308 | 0.20314783495269  | -2.86779323239483  |
| H | -1.24616217854593 | -1.67347436005262 | -2.26066454488254  |
| C | -3.67988248820353 | 5.52943729077882  | 0.38841954922681   |
| H | -1.82340612602908 | 5.41222328040771  | -0.67637161885417  |
| C | 0.39575897026458  | 5.16128066600022  | 1.13337753796967   |
| C | 1.81346223332488  | 5.26460950786568  | -0.86100144524624  |
| C | 1.60902085021550  | 3.63612101325599  | -2.68271694864689  |
| H | -5.50773184108806 | 5.38266321791174  | 1.55468427089271   |
| O | 3.05427344158480  | -0.88667451956365 | -3.95973500334921  |
| N | 2.09161107312629  | -2.76831912817119 | -2.36579872226958  |
| C | 4.20212848340981  | -1.55867420576448 | -4.38903693363598  |
| C | 6.57965881187760  | -1.96883070215773 | -4.18579621094853  |
| C | 7.15781666766596  | 1.16949603319768  | -4.37399402123706  |
| H | 7.29479697366842  | 4.09151496160008  | -1.80595613808777  |
| C | 8.02221933790557  | 3.32796608356972  | -3.67958837952237  |
| O | -3.38441201570825 | 0.79992632448327  | -1.71257184635520  |
| O | -3.35806013477182 | -0.92293103702361 | -3.54908137798594  |
| H | -3.88280417401278 | 6.54869571697377  | 0.05682440982989   |
| H | -0.40775076437548 | 4.69280137908751  | 1.69856493364305   |
| C | 1.08705567449033  | 6.22291748213214  | 1.67983254403161   |
| C | 2.49422131709644  | 6.36610445744767  | -0.27656819216775  |
| C | 2.21982648938179  | 4.73952748318832  | -2.10954593968721  |
| C | 2.10055696573545  | 3.08411915604361  | -3.96479278899686  |
| S | 2.51592375580587  | -3.76386572370593 | -1.17928327290961  |
| C | 4.04945596608441  | -2.54720948898506 | -5.40190474105523  |
| C | 6.45228073824287  | -2.98881948331819 | -5.18605218830564  |
| C | 7.83746840250816  | -1.79487245890627 | -3.553609222629824 |
| C | 7.95799465785483  | 2.26807057650069  | -4.61272242105722  |
| H | 7.11440827472105  | 0.36433027718306  | -5.10553762789024  |
| H | 8.66371797967305  | 4.18810059533699  | -3.87607325289768  |
| H | 0.82047966310941  | 6.58481622127322  | 2.67399818346656   |
| C | 2.14010748997667  | 6.84017734007015  | 0.96726777764062   |
| H | 3.31598422900564  | 6.82232371886798  | -0.83264010355137  |
| H | 3.04421907180224  | 5.22191116625958  | -2.63815715575533  |
| C | 1.24385987469292  | 2.67834902223697  | -4.99749150361163  |
| C | 3.48307285044823  | 2.99544619916730  | -4.19538281271525  |
| O | 2.58662660359897  | -3.13523772994740 | 0.13665089502226   |
| O | 1.68919200230988  | -4.96964854817919 | -1.30646600404209  |
| C | 5.19618340629011  | -3.22168545343239 | -5.79089868434283  |
| C | 2.76099148991418  | -2.80930144314647 | -6.08163146291278  |
| C | 7.59479769810169  | -3.75049849325163 | -5.54743290222119  |
| C | 8.92351655521821  | -2.56643475700827 | -3.91261651209978  |
| H | 7.93477578493189  | -1.05392170690892 | -2.76154096011482  |
| H | 8.54260195591385  | 2.31973535559632  | -5.53252394651993  |
| H | 2.67487326627117  | 7.68287426702637  | 1.40752905984671   |
| C | 1.75082138414008  | 2.22320808684589  | -6.21514631180133  |
| H | 0.16649208787405  | 2.73866505596533  | -4.86035732479143  |
| C | 3.98115155944895  | 2.54287395312620  | -5.41138843886132  |
| H | 4.17838856124256  | 3.26342814224137  | -3.39929162266347  |
| H | 5.13444560716695  | -3.95849279018241 | -6.59290392586859  |



|   |                   |                   |                    |
|---|-------------------|-------------------|--------------------|
| C | 2.44971216821765  | -4.09894268484056 | -6.53919315377824  |
| C | 1.85686666397527  | -1.77724233934948 | -6.39443131914510  |
| H | 7.48595543512095  | -4.52140302095013 | -6.31261093123599  |
| C | 8.80745999495304  | -3.54487452901932 | -4.92593781757672  |
| H | 9.87577296920402  | -2.42869074784882 | -3.39894918535646  |
| F | -1.27756042115596 | 0.74133156536453  | -7.97516556237315  |
| C | 3.12951485506492  | 2.15173840989233  | -6.45713991288616  |
| H | 1.04721337668652  | 1.93261084457157  | -6.99442255374863  |
| H | 5.06307155421647  | 2.49002761018600  | -5.53778512685471  |
| C | 1.32154259348611  | -4.33777431517954 | -7.32530568872824  |
| H | 3.10363068218728  | -4.93340421346673 | -6.27904086266653  |
| C | 0.73330802408770  | -2.02592885304317 | -7.17450423862170  |
| H | 2.04639951558494  | -0.76152630370107 | -6.05139829463004  |
| H | 9.67452480607539  | -4.14598890367506 | -5.20333610904597  |
| C | -1.99039382222060 | 1.89287975186290  | -7.80719474633946  |
| C | 3.72020121310436  | 1.71856147882898  | -7.80304473291776  |
| C | 0.44531298466725  | -3.30340308338560 | -7.68223447881415  |
| H | 1.13457751535315  | -5.35600740748015 | -7.66605777481977  |
| H | 0.07885482772662  | -1.18798169261628 | -7.41548556843665  |
| F | -3.17231539794850 | 1.72058803755284  | -8.45949165042293  |
| C | -2.20286834686229 | 2.21629933360656  | -6.34992190893153  |
| F | -1.31634738838376 | 2.87819305840068  | -8.45631016442990  |
| C | 4.46453020321279  | 2.92411161230436  | -8.41581055668930  |
| C | 2.64202430375646  | 1.25680567265491  | -8.79375293325553  |
| C | 4.72005210503647  | 0.56313064949025  | -7.59672487060993  |
| C | -0.74554369871699 | -3.50015613742807 | -8.62647007340609  |
| C | -2.35264613231203 | 3.55056634825865  | -5.96091311416516  |
| C | -2.29513209565677 | 1.18748541333314  | -5.41105276624749  |
| H | 4.90368638768807  | 2.64593828298152  | -9.38598932137335  |
| H | 3.77777954572238  | 3.76775412841364  | -8.57655477471624  |
| H | 5.27630127625726  | 3.26859626652868  | -7.75987120863449  |
| H | 3.11793206051509  | 0.95868296549129  | -9.73910749914265  |
| H | 2.08492196496070  | 0.38791886809995  | -8.41543742444694  |
| H | 1.92428049321822  | 2.05818965099136  | -9.02190996125279  |
| H | 5.52912026776045  | 0.84415353683869  | -6.90919254946617  |
| H | 4.22231358575286  | -0.32598959549350 | -7.18792538805363  |
| H | 5.17575232192105  | 0.28470855343533  | -8.55886817370922  |
| C | -0.47622409893742 | -2.69273764355336 | -9.91514642321672  |
| C | -2.04385039387676 | -2.98241845776263 | -7.97557021987909  |
| C | -0.94897148021818 | -4.97277948043273 | -9.00870332644319  |
| C | -2.61256610730806 | 3.85269347440428  | -4.62423091952494  |
| H | -2.26466364018376 | 4.34907619816545  | -6.69571056830999  |
| C | -2.55288119081659 | 1.51439596966149  | -4.08066818736677  |
| H | -2.17826945587798 | 0.14413724868149  | -5.70281487453486  |
| H | -1.30938536891721 | -2.81855226926662 | -10.62310755368171 |
| H | -0.37116743037494 | -1.62014334444854 | -9.70112290956394  |
| H | 0.44784440363413  | -3.03351062587551 | -10.40390956758467 |
| H | -2.88391352598930 | -3.08967261244398 | -8.67765418876001  |
| H | -2.28725848118634 | -3.55008296944338 | -7.06711095863080  |
| H | -1.97075879950310 | -1.92058455063854 | -7.70580886726674  |
| H | -0.07657919577179 | -5.38153625559718 | -9.53864422805483  |
| H | -1.14373699813764 | -5.60188143539729 | -8.12737801421883  |
| H | -1.81597621507684 | -5.06181252210267 | -9.67871547009209  |
| C | -2.72620906760465 | 2.83479942667405  | -3.67483862516346  |
| C | -2.72504783217912 | 5.28795058004588  | -4.17046604265596  |
| H | -2.94110993637199 | 3.05555431820646  | -2.62896395312680  |
| F | -3.77431738405032 | 5.46821571949200  | -3.32705842499415  |
| F | -2.88363264475555 | 6.14608273520479  | -5.21052984608903  |

|   |                   |                   |                   |
|---|-------------------|-------------------|-------------------|
| F | -1.60320360699240 | 5.67838133609328  | -3.49680459173066 |
| C | 4.37218452105264  | -5.22168795678063 | -2.61497630884781 |
| C | 4.18356383542249  | -4.29571037843443 | -1.59005424890230 |
| H | 3.51320018191106  | -5.61131737693180 | -3.16115242777730 |
| C | 5.66578609285333  | -5.65289093905404 | -2.91113150678744 |
| C | 5.26234874282852  | -3.79858060641339 | -0.86573711749995 |
| C | 6.76254426580558  | -5.15980901337380 | -2.20016855720240 |
| C | 5.85151947807389  | -6.71137317206608 | -3.96794323696334 |
| C | 6.55274239182447  | -4.23183058153367 | -1.18083220675081 |
| H | 5.08625703223547  | -3.08865222519570 | -0.05893270116270 |
| H | 7.76970717738243  | -5.49009177396884 | -2.44461566008154 |
| F | 5.12763134318298  | -6.43925306983451 | -5.09498187767444 |
| F | 5.43096990051379  | -7.93093754292036 | -3.52744823052655 |
| F | 7.14694512075193  | -6.85094795786368 | -4.34848641270086 |
| C | 7.70391152461247  | -3.71012568596013 | -0.35886484834030 |
| F | 7.66697073446963  | -4.20364234202014 | 0.91218681407002  |
| F | 8.91275497506186  | -4.04360873590327 | -0.87997362876534 |
| F | 7.66923703370348  | -2.35160169879561 | -0.24749347893402 |
| H | 0.22272597753106  | -5.73377941165680 | -2.06872228927780 |
| H | 0.27412268479897  | -6.68252456712430 | -4.52023866154174 |
| H | -2.05362663384310 | -5.78801981390557 | -4.78307896176341 |
| H | -0.70858185457604 | -3.05862260699179 | -4.35281806620628 |

228

TS1-3

|   |                   |                   |                   |
|---|-------------------|-------------------|-------------------|
| C | 0.95754708495624  | 4.12760011182242  | 0.28838105568644  |
| C | -0.32377442755213 | 4.33943785765121  | -0.45665879672842 |
| C | -0.98749591349929 | 5.70809663961093  | -0.22146525111604 |
| C | -1.67437285742108 | 5.79786502938355  | 1.13811755109089  |
| O | -0.78204816908176 | 5.47657356900943  | 2.20796774967243  |
| H | -0.09058715413024 | 4.23350401966957  | -1.52993920212651 |
| H | -1.73881084245885 | 5.87662107363227  | -1.00899376405170 |
| H | -2.54558546495686 | 5.12215179899080  | 1.16103867634790  |
| C | 2.08053608847046  | 5.05194581262873  | 0.08342995194210  |
| C | 3.05359000297353  | 5.21549375557855  | 1.08823070848915  |
| C | 2.23615341508929  | 5.76657565685835  | -1.12022480920840 |
| C | 4.15427033115942  | 6.04355922362672  | 0.88810248511063  |
| H | 2.92684558582101  | 4.70498853558941  | 2.04174473670458  |
| C | 3.34230374685077  | 6.58501940270005  | -1.32336298391518 |
| H | 1.51328303924044  | 5.63537072055395  | -1.92367311432377 |
| C | 4.30745360772930  | 6.72494200638499  | -0.32163224363835 |
| H | 4.89600691386069  | 6.15909036992390  | 1.67979966014856  |
| H | 3.45848803056605  | 7.11046358435598  | -2.27226380809809 |
| H | 5.17545625693814  | 7.36588529929879  | -0.48353144087545 |
| C | 1.12867680657803  | 2.98509653307551  | 1.05869473494390  |
| H | 2.02857591946140  | 2.88026047385558  | 1.66755345361923  |
| H | 0.22687580643502  | 2.50039558643268  | 1.43777570054495  |
| H | 1.28019999867137  | -2.63405863432711 | 6.72347987323635  |
| C | 2.17960236459307  | -2.41270664609681 | 6.13070072694649  |
| C | 2.38886754022636  | -3.43699389270158 | 5.00665603021230  |
| H | 3.04212852471346  | -2.43724627982773 | 6.81241765460103  |
| H | 2.09467510323598  | -1.38888704514754 | 5.73832900635839  |
| C | 1.22251066327243  | -3.45908962212232 | 4.01294715406975  |
| C | 2.52255865965804  | -4.83896728414331 | 5.63773033761601  |
| C | 3.69842842310314  | -3.08863608519117 | 4.27330414577091  |
| C | 4.11232105549185  | 2.07755312096333  | 3.13368617905342  |
| C | 1.26020802519670  | -4.31622958094513 | 2.89957830016034  |
| C | 0.07550457225169  | -2.67073750686664 | 4.17092835874510  |
| H | 1.60144198066412  | -5.11801980014140 | 6.16951474030402  |

|   |                   |                   |                   |
|---|-------------------|-------------------|-------------------|
| H | 2.71792818141517  | -5.60496391784725 | 4.87414726448916  |
| H | 3.35546048307111  | -4.85392911587019 | 6.35728545982132  |
| H | 3.65084668371679  | -2.08305396779568 | 3.83485000322320  |
| H | 4.54368478743599  | -3.11241622585085 | 4.97790747362317  |
| H | 3.90972815671595  | -3.80177417229799 | 3.46606380616351  |
| C | 3.49910498977594  | 0.85190227327171  | 2.81129564034902  |
| C | 3.50219894119625  | 2.98530070723700  | 3.99342682096479  |
| H | 5.06934338098659  | 2.33798914506337  | 2.68076118945414  |
| C | 0.19985200198831  | -4.39186337154421 | 2.00329812316454  |
| H | 2.13961974372954  | -4.93542395325373 | 2.71560719640451  |
| C | -0.99243681683257 | -2.74282758489482 | 3.27712731189513  |
| H | -0.00504540631752 | -1.97886897440028 | 5.00859931236881  |
| C | 4.18888818012699  | -0.10913093613752 | 1.91915410224004  |
| C | 2.25294392545532  | 0.58401036513025  | 3.40543845395741  |
| C | 2.23670040182280  | 2.73955934005013  | 4.55428720154587  |
| H | 4.02019358990365  | 3.92047964687339  | 4.21426341582371  |
| C | -0.95694931343630 | -3.61314321663389 | 2.17868454731978  |
| H | 0.28205315800159  | -5.04466038248716 | 1.13303077821258  |
| H | -1.85809617368533 | -2.10609759615424 | 3.44546080078077  |
| C | 3.48580224292359  | -1.02095341222533 | 1.07770165758160  |
| C | 5.57360197729836  | -0.19158177694814 | 1.89557072130308  |
| C | 1.63654649732267  | 1.51221685482720  | 4.24373181915435  |
| H | 1.73902845473204  | -0.35483760659061 | 3.21231862528633  |
| C | 1.58076786665766  | 3.77144049591918  | 5.47514796903916  |
| C | -2.08444708540837 | -3.74446087101228 | 1.22914240280105  |
| O | 2.09245260913790  | -0.93284886759450 | 1.06255489831740  |
| C | 4.09727638624501  | -2.03109088257313 | 0.34349578543122  |
| H | 6.15769658860264  | 0.45790269230231  | 2.54926251776734  |
| C | 6.26580813261686  | -1.09262760815112 | 1.05544308717010  |
| H | 0.65052587414203  | 1.26504639699512  | 4.63474568432397  |
| C | 2.37896607587681  | 3.81739756353827  | 6.79562060542689  |
| C | 0.12082389672951  | 3.41284694920138  | 5.78983209554559  |
| C | 1.60648561153491  | 5.16686916870307  | 4.81916791179490  |
| C | -2.80434625406604 | -2.61709594801199 | 0.74527529659070  |
| C | -2.47307424464086 | -4.98087891369867 | 0.74025232903094  |
| P | 1.30318299077600  | -0.53999107605389 | -0.29173961278884 |
| C | 5.52717078233978  | -2.03194445062957 | 0.26225555876162  |
| C | 3.27716763653032  | -3.09684567741105 | -0.29510549386752 |
| C | 7.68415240806854  | -1.09111823656819 | 0.98218025571227  |
| H | 3.42651979953164  | 4.10226598890798  | 6.62056931988267  |
| H | 1.93462169258918  | 4.55454476744953  | 7.48146268068748  |
| H | 2.37253053116706  | 2.83609089793806  | 7.29192172197062  |
| H | -0.32389227511133 | 4.20500389287803  | 6.40893312752772  |
| H | -0.48478885871202 | 3.31684885039170  | 4.87737332412951  |
| H | 0.04227249584573  | 2.47080679971297  | 6.35149331606355  |
| H | 1.13864852835964  | 5.90049853098428  | 5.49222388770017  |
| H | 2.63252613890514  | 5.51004204295155  | 4.62407874775417  |
| H | 1.05035634822202  | 5.18357252594217  | 3.87170156130545  |
| O | -2.43554714092607 | -1.35870662170334 | 1.22483479175986  |
| C | -3.84692513512889 | -2.67901801409268 | -0.16722572137264 |
| H | -1.96467084218568 | -5.87765128929561 | 1.10021909251693  |
| C | -3.50678456364303 | -5.12392101899548 | -0.21554016379890 |
| O | 2.04518450369469  | -1.40348860116832 | -1.43031781559407 |
| N | -0.15602948643995 | -0.99478140640442 | -0.01187956336673 |
| N | 1.60411887369269  | 1.00566049697550  | -0.72908294403148 |
| C | 6.24195531762309  | -2.89873464028553 | -0.60351970904604 |
| C | 3.45950514353105  | -4.48213526727749 | 0.03487266313841  |
| C | 2.24692486118329  | -2.76636762000014 | -1.15929007770463 |

|   |                   |                   |                   |
|---|-------------------|-------------------|-------------------|
| H | 8.23618772847346  | -0.37521870207399 | 1.59394711563999  |
| C | 8.34949777717170  | -1.95335351171205 | 0.13793995109973  |
| P | -1.58421442484200 | -0.38391924331597 | 0.25213106731806  |
| C | -4.49082918040074 | -1.42541205352708 | -0.64778225807141 |
| C | -4.20900671820882 | -3.96462090150784 | -0.69044200074172 |
| C | -3.84138042006806 | -6.40038444580570 | -0.74156707240930 |
| S | 2.15432570497512  | 1.50424584446815  | -2.19358985033672 |
| H | 1.35816909010361  | 2.05368899721222  | 0.10968616957213  |
| C | 7.61916748886713  | -2.85652818672460 | -0.66794777224870 |
| H | 5.68702229557006  | -3.58956941328079 | -1.23706678006826 |
| C | 4.41228701940112  | -4.93553415581973 | 0.98402241675665  |
| C | 2.59687539753208  | -5.45298036229574 | -0.57779524073380 |
| C | 1.37739575349127  | -3.70085714224520 | -1.78494334219787 |
| H | 9.43879410393356  | -1.93418164186545 | 0.08162404442312  |
| O | -2.32256217922605 | -0.56674292322676 | -1.17681263587392 |
| N | -1.73981141299612 | 1.10398722340223  | 0.80544483779616  |
| C | -3.71087312183373 | -0.41558254778526 | -1.19886704729895 |
| C | -5.90569149882150 | -1.21640227548207 | -0.57130158008016 |
| C | -5.19120293279687 | -4.14250806347815 | -1.69979448229356 |
| H | -3.30446244396921 | -7.27339365398915 | -0.36424486756724 |
| C | -4.80676887992786 | -6.53815193773036 | -1.71478221420289 |
| O | 1.98719094436237  | 2.95095396200606  | -2.19160857849454 |
| O | 1.61450172249396  | 0.72278627629975  | -3.29330787317843 |
| H | 8.14767979421447  | -3.51644886855500 | -1.35686880567878 |
| H | 5.05882995093019  | -4.21174752657920 | 1.47619749567232  |
| C | 4.52216281177893  | -6.27419804199297 | 1.30074774928901  |
| C | 2.74773199833229  | -6.82459436904742 | -0.24075502610405 |
| C | 1.59131308060528  | -5.03513935493274 | -1.48131868702534 |
| C | 0.28699598955419  | -3.28432649365247 | -2.69334945041657 |
| S | -2.19729698607122 | 1.48050426365200  | 2.29547305819909  |
| C | -4.23479808602840 | 0.75255759086766  | -1.82157862676701 |
| C | -6.46449216407363 | -0.04289247801339 | -1.17928165623308 |
| C | -6.77330561316214 | -2.09884984080123 | 0.12193149703188  |
| C | -5.48074846021189 | -5.39515150494334 | -2.20119677647044 |
| H | -5.71758361335093 | -3.27217658690508 | -2.08713072362772 |
| H | -5.04755244565064 | -7.52391143822113 | -2.11511249760767 |
| H | 5.25606950891379  | -6.59381371570190 | 2.04206770188962  |
| C | 3.68860247599598  | -7.23138450245964 | 0.67968933386605  |
| H | 2.08884657388546  | -7.55162556089825 | -0.72022311293325 |
| H | 0.96100448550543  | -5.79235684787463 | -1.95189852263948 |
| C | 0.46618905516953  | -2.29883799159761 | -3.67325430874883 |
| C | -0.97340740715913 | -3.89968800783624 | -2.60889718044349 |
| O | -1.65482005058946 | 0.60526420631652  | 3.33189568238713  |
| O | -1.98570148414341 | 2.92451977062851  | 2.45376110955022  |
| C | -5.61427243206083 | 0.88928447819857  | -1.81764036873436 |
| C | -3.37283107077173 | 1.75957763231042  | -2.48255277473007 |
| C | -7.86746545725115 | 0.16681961234894  | -1.11417596163203 |
| C | -8.12948041897064 | -1.85353175240748 | 0.18665054034503  |
| H | -6.35218079596276 | -2.96884271064856 | 0.62415704938731  |
| H | -6.23415107006694 | -5.50168234400340 | -2.98316102461558 |
| H | 3.78728008726560  | -8.28721058593417 | 0.93539475960058  |
| C | -0.56876094813569 | -1.95415575077176 | -4.54171364732065 |
| H | 1.42113219433987  | -1.78634233708028 | -3.76703024536798 |
| C | -1.99929110199307 | -3.55360126293108 | -3.48114878553123 |
| H | -1.16185418178531 | -4.63785744783025 | -1.82785794204539 |
| H | -6.06632014569620 | 1.74779451693608  | -2.31635393270801 |
| C | -3.73282727762545 | 3.11867304571783  | -2.46529567689754 |
| C | -2.21713427556474 | 1.40926786127254  | -3.20077677776691 |

|   |                   |                   |                   |
|---|-------------------|-------------------|-------------------|
| H | -8.28236389080428 | 1.06079415904730  | -1.58364798947941 |
| C | -8.68561216921903 | -0.71850668177159 | -0.44619350228841 |
| H | -8.77495476484683 | -2.53484043952336 | 0.74243039152301  |
| F | 5.78892728279495  | -2.18419635677918 | -3.80021792324696 |
| C | -1.82240505361690 | -2.57536270673856 | -4.47480490969233 |
| H | -0.37707613340821 | -1.18140248163599 | -5.28530496422575 |
| H | -2.96280123453978 | -4.05317708037892 | -3.37105677221701 |
| C | -2.99651000487851 | 4.06931224861720  | -3.16761950482163 |
| H | -4.60151794384297 | 3.43741125613537  | -1.88634022133870 |
| C | -1.47856619776249 | 2.36910569076767  | -3.88999622648939 |
| H | -1.88588975347765 | 0.37327452236175  | -3.23870901754208 |
| H | -9.76005856907593 | -0.53758010788820 | -0.39169678648443 |
| C | 6.46659509501761  | -1.00385975259921 | -3.83368598663036 |
| C | -2.96307770337692 | -2.24874225365158 | -5.44454520365353 |
| C | -1.85545202985794 | 3.71930391800992  | -3.90929681147069 |
| H | -3.32984386583593 | 5.10781218075841  | -3.13634812097241 |
| H | -0.58556023092176 | 2.03853758368188  | -4.41843617035079 |
| F | 6.422262691892014 | -0.56688719023792 | -5.12580388018978 |
| C | 5.86340497513698  | 0.01681523588363  | -2.90069137402479 |
| F | 7.76629729373801  | -1.26870628874087 | -3.54821865900825 |
| C | -2.59503102677730 | -1.12223362637164 | -6.42034719821066 |
| C | -4.21563288536753 | -1.81606324830274 | -4.65820923675186 |
| C | -3.29323325549330 | -3.51770519544566 | -6.25837914852142 |
| C | -1.11842101339054 | 4.75491275338578  | -4.76689929797085 |
| C | 6.67081623428982  | 0.79323468285100  | -2.07236155508162 |
| C | 4.47909814644314  | 0.21272133785058  | -2.93165831172509 |
| H | -1.73287055353245 | -1.38988658218453 | -7.04846587774104 |
| H | -3.44563390078526 | -0.92590682778437 | -7.08900219704226 |
| H | -2.36410049960378 | -0.18571056366102 | -5.89184611465610 |
| H | -5.04612851009598 | -1.61678459531975 | -5.35239082932992 |
| H | -4.54027098727812 | -2.59588498650746 | -3.95730794669655 |
| H | -4.02687849566332 | -0.90017674777730 | -4.08269029332111 |
| H | -3.60635597950270 | -4.34256625726936 | -5.60298983519689 |
| H | -4.11230585467889 | -3.31327337386368 | -6.96474691855894 |
| H | -2.41760571999236 | -3.85410535015296 | -6.83227917928440 |
| C | 0.28410794877264  | 4.27353548935303  | -5.17203948413230 |
| C | -0.96695294695639 | 6.09541559281698  | -4.02541771981370 |
| C | -1.95524101161662 | 4.98616652219831  | -6.04426284815056 |
| C | 6.08656722999058  | 1.78273793370948  | -1.27403708611774 |
| H | 7.74602157853044  | 0.62680444695689  | -2.04200796104953 |
| C | 3.91995207910696  | 1.19938974173869  | -2.12824681230186 |
| H | 3.83691118593023  | -0.38506045990446 | -3.57728638427785 |
| H | 0.24236603402382  | 3.39130431080941  | -5.82594806866963 |
| H | 0.79608640944401  | 5.06994011431835  | -5.73182153741789 |
| H | 0.89713614147830  | 4.01750339709656  | -4.29616107468274 |
| H | -1.93592300506614 | 6.54164802737925  | -3.76388312016828 |
| H | -0.38955779631905 | 5.97526849129710  | -3.09849028364052 |
| H | -0.43581821626545 | 6.81577290547242  | -4.66481735859881 |
| H | -2.95794477949362 | 5.36418652740205  | -5.79804090017877 |
| H | -1.46032379565751 | 5.72042045226875  | -6.69857659753486 |
| H | -2.07522757110901 | 4.04846336180206  | -6.60555886302577 |
| C | 4.70981883619815  | 1.99610837118617  | -1.29733034028358 |
| C | 6.96384775351490  | 2.68357974850794  | -0.44167236074431 |
| H | 4.25507534297188  | 2.77852639294387  | -0.68878526369274 |
| F | 7.35367186019300  | 3.78394114046080  | -1.14668139354206 |
| F | 8.09854759387458  | 2.05895946684791  | -0.02752882278902 |
| F | 6.32403267084642  | 3.13884553774356  | 0.67071998506287  |
| C | -4.53894536277432 | 0.17645312134672  | 2.97667992565037  |

|   |                   |                   |                   |
|---|-------------------|-------------------|-------------------|
| C | -3.98301235366642 | 1.26811245207523  | 2.31728526682631  |
| H | -3.88635568687603 | -0.54050272580154 | 3.47254767470400  |
| C | -5.92796758935592 | 0.02699289420304  | 2.99668858615364  |
| C | -4.79072358962486 | 2.21566103958384  | 1.69001914151212  |
| C | -6.75343950504069 | 0.96590984814052  | 2.37940311327262  |
| C | -6.51145288002192 | -1.14713026687887 | 3.74084146325056  |
| C | -6.17694989939573 | 2.06151025469368  | 1.73225258805903  |
| H | -4.33689496792059 | 3.06962944661391  | 1.18741545888486  |
| H | -7.83411542587361 | 0.84238242588924  | 2.39408405273494  |
| F | -6.33161461940718 | -1.01803928585219 | 5.08704534949089  |
| F | -5.91395884658043 | -2.31884502951058 | 3.38149643896830  |
| F | -7.84503115029539 | -1.29048208677252 | 3.52964963261433  |
| C | -7.04560000159292 | 3.13539200440397  | 1.12908795246301  |
| F | -7.05789817176569 | 4.25599212569951  | 1.90640188353760  |
| F | -6.59660192610067 | 3.52640651188310  | -0.10067440611406 |
| F | -8.33598095899799 | 2.74281674182531  | 0.97800661418850  |
| H | -1.00453288612665 | 4.56056207730252  | 2.47307714821782  |
| H | -2.04102027519406 | 6.82546689936220  | 1.29864630044650  |
| H | -0.23918633078449 | 6.51031573285544  | -0.30965208593184 |
| H | -1.02328012485641 | 3.52546650054453  | -0.21780339416728 |

228

TS1-4

|   |                   |                   |                   |
|---|-------------------|-------------------|-------------------|
| C | -1.16890256413186 | -4.32086384801995 | -0.17961821815726 |
| C | -0.15818741841689 | -4.67826558422125 | -1.22607217153017 |
| C | 1.31308044436808  | -4.68247099840271 | -0.80042143242237 |
| C | 1.61883743964209  | -5.81842488530462 | 0.16834472829679  |
| O | 0.79249725760584  | -5.78857561189073 | 1.33197644637599  |
| H | -0.42537463826795 | -5.64114868254694 | -1.68438496588637 |
| H | 1.58772690614360  | -3.71557116802823 | -0.35547538343341 |
| H | 2.68887023968301  | -5.79264412077227 | 0.44776738727386  |
| C | -2.38304586553770 | -5.13837623695986 | -0.07753613736092 |
| C | -3.62242714659468 | -4.53691371867112 | 0.20498604704704  |
| C | -2.33453743949760 | -6.53578017406296 | -0.23216450832492 |
| C | -4.78097907970280 | -5.29960403730549 | 0.30452386417728  |
| H | -3.66652005134585 | -3.45684949273122 | 0.33549283996086  |
| C | -3.48868704604014 | -7.30354748622783 | -0.09506874442129 |
| H | -1.37644220988913 | -7.02518206025810 | -0.40537750102092 |
| C | -4.71705384980141 | -6.68853236142358 | 0.15885425535181  |
| H | -5.73805717555763 | -4.81046664122920 | 0.49428638968094  |
| H | -3.42995896951441 | -8.38854873334718 | -0.19131228696362 |
| H | -5.62322386781003 | -7.29017033088984 | 0.24421599202959  |
| C | -1.03989139553121 | -3.16865212152565 | 0.58507798295444  |
| H | -1.68182005237659 | -3.05875241316706 | 1.46162596230139  |
| H | -0.03837467390657 | -2.74048837429385 | 0.67979083278840  |
| H | -3.42078624454970 | 4.02793999392143  | 6.88313864096032  |
| C | -2.58074317931099 | 4.06827045469402  | 6.17292067139326  |
| C | -2.51611897904686 | 2.76472462245335  | 5.34919398652157  |
| H | -1.65258230700393 | 4.21695565896669  | 6.74342309876860  |
| H | -2.72337140802466 | 4.94443302323055  | 5.52481374142015  |
| C | -1.33876074198920 | 2.86537126866358  | 4.37341747239924  |
| C | -3.83512859756075 | 2.59620357831916  | 4.57001500513493  |
| C | -2.37399839611928 | 1.58126847833935  | 6.31657716704641  |
| C | -2.40529914473764 | -0.96969691778112 | 3.25208672018040  |
| C | -0.22241617520234 | 2.02140378982966  | 4.43595658791507  |
| C | -1.33232154317031 | 3.85827215810335  | 3.37928920695896  |
| H | -3.83440679092654 | 1.66582620225744  | 3.98698776960580  |
| H | -4.68410599242180 | 2.55902310621702  | 5.26936398706285  |
| H | -4.00497368731171 | 3.43067849774440  | 3.87670478656806  |

|   |                   |                   |                   |
|---|-------------------|-------------------|-------------------|
| H | -1.47257237244920 | 1.66936254532112  | 6.94012732729938  |
| H | -3.24274210765468 | 1.55344498674135  | 6.99022309455537  |
| H | -2.33553883534640 | 0.62063624426159  | 5.78280421928636  |
| C | -3.64215359734971 | -1.08834897832474 | 2.59385850217804  |
| C | -1.84982311764281 | -2.04569794126594 | 3.94386297774150  |
| H | -1.85243045706867 | -0.03327796300417 | 3.22166549397754  |
| C | 0.85838751558067  | 2.16792466185822  | 3.56629473170580  |
| H | -0.17506373669607 | 1.22619859567487  | 5.17928761317938  |
| C | -0.26072750321662 | 4.00861238088355  | 2.50686924174534  |
| H | -2.18519545927748 | 4.52949878489076  | 3.27049396233478  |
| C | -4.25787843523364 | 0.02084836727685  | 1.83039875094021  |
| C | -4.31356832386864 | -2.31941601611735 | 2.70351183625714  |
| C | -2.49988817477770 | -3.28529818684539 | 4.02233959231462  |
| H | -0.86779209319583 | -1.90795887738365 | 4.39494515714187  |
| C | 0.86699393993516  | 3.17347941663995  | 2.58862628628994  |
| H | 1.69775386856352  | 1.48278082962054  | 3.65933728433671  |
| H | -0.30941981128350 | 4.77221001586158  | 1.72938132629504  |
| C | -3.48310061564513 | 0.97112664739565  | 1.10471026467811  |
| C | -5.63305495419873 | 0.19547669094147  | 1.80397138403853  |
| C | -3.75763244454275 | -3.38442720893717 | 3.40315368157780  |
| H | -5.27051034449003 | -2.45705712027013 | 2.19674524239190  |
| C | -1.89575100215702 | -4.49905021496615 | 4.73204056071725  |
| C | 2.01362771866822  | 3.40279590852142  | 1.68136037319544  |
| O | -2.09723843848124 | 0.79695479702177  | 1.10322838470161  |
| C | -4.01431003625508 | 2.08399006205447  | 0.46413228025085  |
| H | -6.26785104258989 | -0.48477703995996 | 2.37345494060945  |
| C | -6.25098467733402 | 1.22577412655633  | 1.05963240613513  |
| H | -4.30332479522456 | -4.32849768227913 | 3.43347183095137  |
| C | -1.85889724423587 | -5.70046886252412 | 3.76441450535873  |
| C | -2.77951260685627 | -4.84987247475634 | 5.94717778004023  |
| C | -0.46583729222518 | -4.22717097553276 | 5.22036815509958  |
| C | 2.74924488010108  | 2.33890008550044  | 1.08851233647300  |
| C | 2.41461046684235  | 4.68780956165753  | 1.35233368992688  |
| P | -1.32962186402248 | 0.44745797118108  | -0.27304793426765 |
| C | -5.44057666615892 | 2.18922815449728  | 0.37207067211936  |
| C | -3.11480979593155 | 3.14207135457410  | -0.06991712472878 |
| C | -7.66518207194326 | 1.32611120276032  | 0.97566425634249  |
| H | -1.22860691254964 | -5.49444296537752 | 2.88913155486723  |
| H | -1.44069369617498 | -6.57871819746924 | 4.27832911161310  |
| H | -2.86134660438427 | -5.96974630436049 | 3.40330250376700  |
| H | -2.82131988573710 | -4.01112011917437 | 6.65731222784352  |
| H | -3.80847350934451 | -5.08721022224624 | 5.64125478027101  |
| H | -2.37037573558375 | -5.72636339327973 | 6.47201313438246  |
| H | -0.43538123919691 | -3.42133307707800 | 5.96828825617566  |
| H | -0.06339791775951 | -5.13442689819627 | 5.69325836333176  |
| H | 0.20570771416156  | -3.95298285205754 | 4.39414787217346  |
| O | 2.38038091697678  | 1.03359415462189  | 1.41940839701548  |
| C | 3.81666664052773  | 2.50875513931708  | 0.21922425105552  |
| H | 1.89943395896348  | 5.53658523931029  | 1.80625949018146  |
| C | 3.46967511172341  | 4.94252752035917  | 0.44548540351372  |
| O | -1.96435526004473 | 1.47777918207872  | -1.33645932701354 |
| N | 0.15970187652036  | 0.72179067944307  | 0.04883004697970  |
| N | -1.80655770613918 | -1.01259041833271 | -0.84788616523903 |
| C | -6.08550818082418 | 3.18522330308857  | -0.40511351774370 |
| C | -3.22336204121446 | 4.50446081324253  | 0.36927881494520  |
| C | -2.09032681232570 | 2.82109000383674  | -0.94655907108985 |
| H | -8.27158750728701 | 0.58909860905663  | 1.50569127305057  |
| C | -8.26123814537354 | 2.31365388844496  | 0.22158428909734  |

|   |                   |                   |                   |
|---|-------------------|-------------------|-------------------|
| P | 1.59303765183004  | 0.13835161619141  | 0.32487077840768  |
| C | 4.49900526788683  | 1.32781746316192  | -0.37691598778076 |
| C | 4.18322680493840  | 3.84689640924387  | -0.14733973570448 |
| C | 3.81607413389709  | 6.27249313487303  | 0.08518548743872  |
| S | -2.32333310677830 | -1.31764631428335 | -2.38377621575119 |
| H | -1.47735548579194 | -2.14599076345834 | -0.19364981522272 |
| C | -7.46182794755190 | 3.24361875061592  | -0.48156615463375 |
| H | -5.47868887864577 | 3.89869953010170  | -0.96078156257413 |
| C | -4.15603036518168 | 4.93222017445919  | 1.35014962765052  |
| C | -2.30864256321608 | 5.47345809471856  | -0.16418435820853 |
| C | -1.16178803402837 | 3.75335379080900  | -1.48493879268003 |
| H | -9.34859530127419 | 2.37258013637604  | 0.15625262563745  |
| O | 2.37044923263382  | 0.48005085849841  | -1.05242522515775 |
| N | 1.77076365391866  | -1.38879593619586 | 0.74566928478669  |
| C | 3.76175125904076  | 0.37132506965605  | -1.06506211045866 |
| C | 5.91770063445213  | 1.15129092735697  | -0.28961325696740 |
| C | 5.18309186506531  | 4.14215143054790  | -1.11105133694157 |
| H | 3.27109749881577  | 7.09492775280378  | 0.55360893028695  |
| C | 4.80274901236850  | 6.52366274339820  | -0.84271560007991 |
| O | -2.38641611034841 | -2.76946474321634 | -2.48147634749673 |
| O | -1.58286218395935 | -0.56116504187349 | -3.38070965117504 |
| H | -7.93545883104175 | 4.00633860624850  | -1.10085051183847 |
| H | -4.83591780488468 | 4.20529452491618  | 1.79017560390848  |
| C | -4.20457909675362 | 6.24811687662438  | 1.76233306867127  |
| C | -2.39667436883118 | 6.82347497406140  | 0.26965971100721  |
| C | -1.31404897234295 | 5.07144360576437  | -1.08558404220434 |
| C | -0.07390153333871 | 3.36080108042704  | -2.40720176223616 |
| S | 2.19090419732508  | -1.90059626269925 | 2.21031202212232  |
| C | 4.33591246651012  | -0.68326457821321 | -1.83317314049153 |
| C | 6.52623698914356  | 0.08729569652551  | -1.03414231886695 |
| C | 6.74130912719734  | 1.95918350390889  | 0.53534564789852  |
| C | 5.48388600539319  | 5.44516103133149  | -1.45138347437934 |
| H | 5.71333148701585  | 3.32330932253375  | -1.59374710687618 |
| H | 5.05384489588831  | 7.54973124877894  | -1.11494469816537 |
| H | -4.92560421008782 | 6.54768436361458  | 2.52441352847456  |
| C | -3.32455713892275 | 7.20760605110267  | 1.21246286296162  |
| H | -1.69979303490856 | 7.55022837803740  | -0.15317445875785 |
| H | -0.64065748389493 | 5.82797304173504  | -1.49295680612916 |
| C | 1.20014971404513  | 3.93661088394481  | -2.26617956156484 |
| C | -0.26359512871430 | 2.45312537570372  | -3.45822284873157 |
| O | 1.60782605842059  | -1.13061301737723 | 3.30564936887731  |
| O | 1.99961438083785  | -3.35470774209763 | 2.22850668071247  |
| C | 5.72026666873889  | -0.77042658850488 | -1.81633066479727 |
| C | 3.52793018905105  | -1.61618469665416 | -2.65384061457894 |
| C | 7.93372017847007  | -0.08860625554715 | -0.96280634261172 |
| C | 8.10298515166373  | 1.74684408653957  | 0.60089726654518  |
| H | 6.28217485750113  | 2.74206987097368  | 1.13753335171803  |
| H | 6.25186834860037  | 5.64273393706309  | -2.20081208679239 |
| H | -3.37630783438111 | 8.24612656428383  | 1.54214992131477  |
| C | 2.22622153542169  | 3.63361699520306  | -3.15348286500564 |
| H | 1.39702560914610  | 4.61085851349734  | -1.43147524133086 |
| C | 0.77265427551486  | 2.14932021419883  | -4.34063172872867 |
| H | -1.22794240931203 | 1.97075064835468  | -3.59979734794124 |
| H | 6.21508156055409  | -1.53015860056908 | -2.42237862047043 |
| C | 2.31509676025731  | -1.24633338151548 | -3.26059316130615 |
| C | 3.99950123651859  | -2.91755416216544 | -2.90954948888134 |
| H | 8.38673362137528  | -0.89951653090141 | -1.53633402538288 |
| C | 8.70861817180959  | 0.72292447557808  | -0.16280481087451 |



|   |                   |                   |                   |
|---|-------------------|-------------------|-------------------|
| H | 8.71433603960143  | 2.36618944206358  | 1.25842634892189  |
| F | -5.83541935969740 | 1.88177003457977  | -5.27862156080722 |
| C | 2.03852245433023  | 2.73688864472702  | -4.21873077968634 |
| H | 3.19778891917686  | 4.10444768554986  | -2.99911903981783 |
| H | 0.57209170078481  | 1.43717545977418  | -5.14030980803427 |
| C | 1.61393791697630  | -2.13280825204282 | -4.07762557698855 |
| H | 1.90511228472854  | -0.25043410050390 | -3.11192604301047 |
| C | 3.30732107752575  | -3.78624993576098 | -3.74670338177525 |
| H | 4.91683246757523  | -3.26300745199358 | -2.43032173924486 |
| H | 9.78693442994031  | 0.56770689215457  | -0.10568368832798 |
| C | -5.98540714925520 | 2.10945562540230  | -3.94260365988609 |
| C | 3.17852662670629  | 2.46880499943451  | -5.20683287286518 |
| C | 2.09238436028549  | -3.42016015546007 | -4.35195941162101 |
| H | 0.67020362310273  | -1.79120909271940 | -4.50135151346164 |
| H | 3.72390047041944  | -4.78024511910462 | -3.91998132805187 |
| F | -7.26003330527607 | 2.53310705333524  | -3.75044081647979 |
| C | -5.65735704156787 | 0.87307143417153  | -3.14254032059767 |
| F | -5.15763524391652 | 3.14571329968793  | -3.62999276196554 |
| C | 4.44098670436974  | 2.01139557524698  | -4.45091836301788 |
| C | 3.48825984339277  | 3.78146189480908  | -5.95731851253029 |
| C | 2.81711896541253  | 1.38757657153229  | -6.23508259626299 |
| C | 1.37149287073409  | -4.38172169093727 | -5.30201949688953 |
| C | -6.65928322630897 | 0.14952688257359  | -2.49623734258368 |
| C | -4.32895577670705 | 0.44239579268382  | -3.10424230495328 |
| H | 4.76567680719349  | 2.75705615486869  | -3.71307662320804 |
| H | 4.26486954024904  | 1.06550406211086  | -3.92252595096704 |
| H | 5.26793605141318  | 1.85637470986607  | -5.16028913424808 |
| H | 2.60553587734803  | 4.13466745740012  | -6.50984055884062 |
| H | 3.79251104576336  | 4.57610714904515  | -5.26154460630175 |
| H | 4.30678105200015  | 3.62442843035098  | -6.67639419762547 |
| H | 2.58859357283965  | 0.42705230091267  | -5.75054129784972 |
| H | 1.95561358427869  | 1.68107594315441  | -6.85238962269147 |
| H | 3.66953392310614  | 1.22651068806520  | -6.91088753279122 |
| C | -0.03003301418678 | -3.87823149589463 | -5.67859557903901 |
| C | 1.22371166999118  | -5.77416123561621 | -4.65790494593354 |
| C | 2.21639607070410  | -4.51026934449283 | -6.58757787849889 |
| C | -6.32471532566364 | -1.02230214466152 | -1.81356166002416 |
| H | -7.68979144634918 | 0.49751174733295  | -2.51862317037244 |
| C | -4.01602630921093 | -0.72225183774021 | -2.41051034648852 |
| H | -3.54127176489502 | 0.99611688331102  | -3.61290093149358 |
| H | 0.01095296822843  | -2.92866654421172 | -6.23085480899103 |
| H | -0.52162706868087 | -4.61660111964760 | -6.32848044837501 |
| H | -0.66541339851129 | -3.73093701611708 | -4.79294575966361 |
| H | 0.73104241866104  | -6.46084435932255 | -5.36220548042036 |
| H | 2.19488454191619  | -6.21277690404310 | -4.39097566843347 |
| H | 0.60943610723351  | -5.72323640760398 | -3.74878618309971 |
| H | 2.33483298832370  | -3.53209892088834 | -7.07553751701367 |
| H | 3.21968949509761  | -4.90241445009940 | -6.36802280772713 |
| H | 1.72839298632506  | -5.19469606189571 | -7.29828268588790 |
| C | -5.00371223983759 | -1.46802884315391 | -1.76933707516653 |
| C | -7.39197117710149 | -1.86828786269066 | -1.16619707520591 |
| H | -4.74391882477763 | -2.39613399522560 | -1.26121406463838 |
| F | -7.61750055464775 | -3.00955927562656 | -1.87635378111150 |
| F | -8.57846791806176 | -1.22222119035240 | -1.05806565547293 |
| F | -7.03068196563052 | -2.26490157787038 | 0.09201707838407  |
| C | 4.80219571068082  | -2.51182546831079 | 1.55739532476597  |
| C | 3.97126534853341  | -1.66167682430754 | 2.28630347578197  |
| H | 4.36950692724816  | -3.30628555187814 | 0.94924639049808  |

|        |                   |                   |                   |
|--------|-------------------|-------------------|-------------------|
| C      | 6.18447861478126  | -2.33772688744844 | 1.63178659129339  |
| C      | 4.49948186890678  | -0.64692000192150 | 3.07750305238360  |
| C      | 6.73408490312351  | -1.31827304209539 | 2.41335096743067  |
| C      | 7.07858975235486  | -3.31409755387261 | 0.91125969679015  |
| C      | 5.88548775508272  | -0.47625645350326 | 3.13071220717213  |
| H      | 3.82848597064941  | -0.00543806208566 | 3.64715282224909  |
| H      | 7.81196913091574  | -1.17712073344250 | 2.45376873155983  |
| F      | 8.36088674540352  | -2.87932612603659 | 0.81648337074375  |
| F      | 6.64274818085523  | -3.56605981234180 | -0.35844093498563 |
| F      | 7.11217673344045  | -4.51820716973616 | 1.55111158159702  |
| C      | 6.43977112595738  | 0.61058764415319  | 4.01637559530223  |
| F      | 6.24185822429673  | 0.32284281061546  | 5.33499162369592  |
| F      | 7.77398303793870  | 0.79584754613362  | 3.84534244391088  |
| F      | 5.82989504396466  | 1.80830736095270  | 3.78618307752876  |
| H      | 1.03568840547221  | -4.96410109683211 | 1.80575274618838  |
| H      | 1.42853269838976  | -6.79206947015166 | -0.31297548159399 |
| H      | 1.93838750125204  | -4.79366457592284 | -1.69900083681896 |
| H      | -0.29941057837203 | -3.92700928015770 | -2.02406019942364 |
| 228    |                   |                   |                   |
| TS1-1' |                   |                   |                   |
| C      | 0.14941323787541  | -4.41026946214439 | -0.81157055844671 |
| C      | 0.49324290974072  | -5.66309673084176 | -1.55506659404388 |
| C      | -0.77548814980113 | -6.48046113283091 | -1.90752828607213 |
| C      | -1.83832243109286 | -5.68070524384267 | -2.65262844583548 |
| O      | -2.45199743514897 | -4.74601720975968 | -1.76395875431854 |
| H      | 1.02221663849773  | -5.39428747358371 | -2.48039898035230 |
| H      | -1.22838490093546 | -6.87991952575085 | -0.98682970233849 |
| H      | -2.60143216220595 | -6.37789358230407 | -3.04670877036953 |
| C      | -0.31085135603640 | -4.50042119992982 | 0.57499594750443  |
| C      | -0.09543032687650 | -5.66323793646572 | 1.34368734794442  |
| C      | -0.89666038645556 | -3.39002124414029 | 1.20912923013183  |
| C      | -0.42462989850006 | -5.69506946768045 | 2.69433038541335  |
| H      | 0.37431136051337  | -6.53715601048900 | 0.89471397391996  |
| C      | -1.22268523193125 | -3.41840270649616 | 2.55744858428478  |
| H      | -1.11724835224546 | -2.49687131307562 | 0.63252042418962  |
| C      | -0.98035335318883 | -4.56899700174699 | 3.30842552376341  |
| H      | -0.23335520011371 | -6.59774747341909 | 3.27609815703395  |
| H      | -1.66703082350877 | -2.53679493644472 | 3.01619626155668  |
| H      | -1.22656172653154 | -4.59253482430710 | 4.37148393011844  |
| C      | 0.36416401900140  | -3.18290910525563 | -1.42704990366125 |
| H      | 0.69704929360963  | -3.18260829511599 | -2.46645010187903 |
| H      | -0.29808454110911 | -2.34872168826616 | -1.16697160904508 |
| H      | 5.20980109780950  | 2.03742245724744  | -5.81132336085419 |
| C      | 4.52621314475165  | 2.08742792353728  | -4.95031867456363 |
| C      | 3.29291835561707  | 2.93919775914696  | -5.31251006733976 |
| H      | 5.08429234312480  | 2.50822447023384  | -4.10270299471144 |
| H      | 4.22895271795443  | 1.06376111827397  | -4.68615390141222 |
| C      | 2.36649037589295  | 3.07373955955689  | -4.09964753413444 |
| C      | 2.59160557379832  | 2.27434097660452  | -6.50557794052690 |
| C      | 3.75484170111558  | 4.35057676527381  | -5.73204799644134 |
| C      | 4.08276619655316  | -1.92381884514826 | -3.26999776642414 |
| C      | 1.00345470466508  | 2.75320332238612  | -4.14476691135021 |
| C      | 2.86334189348547  | 3.55872676688261  | -2.87793945853738 |
| H      | 1.73460946312566  | 2.86528198960207  | -6.85982027596350 |
| H      | 3.29958280622063  | 2.18295326670416  | -7.34198662800572 |
| H      | 2.23873800570706  | 1.26395150397985  | -6.25197458704564 |
| H      | 2.89439956952572  | 4.98053421117348  | -6.00033874961801 |
| H      | 4.29977345389548  | 4.85092366952464  | -4.91906080579897 |

|   |                   |                   |                   |
|---|-------------------|-------------------|-------------------|
| H | 4.42395786619301  | 4.28882244868055  | -6.60383297158800 |
| C | 3.48270163647995  | -0.76174925055975 | -2.75982687854833 |
| C | 3.47742607294476  | -2.66682493040101 | -4.28437306292539 |
| H | 5.03776570141514  | -2.25998869761975 | -2.86255208657838 |
| C | 0.17764302517051  | 2.89830926396299  | -3.03048207471982 |
| H | 0.56175065295034  | 2.36371878057547  | -5.06097394157520 |
| C | 2.04324868013039  | 3.71801101837316  | -1.76720894232307 |
| H | 3.92063304353681  | 3.81426588781475  | -2.78352590741999 |
| C | 4.19477590352611  | 0.04805609757089  | -1.74703963918980 |
| C | 2.23198108530875  | -0.39341961425490 | -3.28739895113181 |
| C | 2.24612047343362  | -2.28397663842913 | -4.83352402837195 |
| H | 3.98640748155208  | -3.55978008341943 | -4.64663920892398 |
| C | 0.67885202541805  | 3.38812424312774  | -1.81532259928872 |
| H | -0.87187367472770 | 2.62733920481000  | -3.11902564511525 |
| H | 2.47342799124229  | 4.08572414833686  | -0.83654148295107 |
| C | 3.52793720732409  | 0.71389749887137  | -0.68194855490660 |
| C | 5.57268466172494  | 0.18885135671197  | -1.79576767689090 |
| C | 1.63679498220840  | -1.13695320512578 | -4.29922201274447 |
| H | 1.72630653722527  | 0.50038651647903  | -2.93338883429378 |
| C | 1.56086711767665  | -3.04372321264485 | -5.97238885251626 |
| C | -0.19559478369018 | 3.64606281287418  | -0.64932246111745 |
| O | 2.13013944599050  | 0.62583095922543  | -0.63797590122982 |
| C | 4.16727105207222  | 1.44993651867338  | 0.30782589284536  |
| H | 6.12370632590718  | -0.25897812378968 | -2.62373353114918 |
| C | 6.29852327934154  | 0.87506830769538  | -0.79610922678320 |
| H | 0.66359377001156  | -0.80736867963303 | -4.66427524829435 |
| C | 2.38338134731315  | -4.24881728753104 | -6.44719488236925 |
| C | 1.36538935385715  | -2.08381222379437 | -7.16484555720085 |
| C | 0.18397827075860  | -3.54727205162248 | -5.49557053475332 |
| C | -1.31585872090577 | 2.82654133013158  | -0.32547654486661 |
| C | -0.00113278957234 | 4.76520269518433  | 0.14484509781528  |
| P | 1.50049155929193  | -0.35112963649979 | 0.48140822168345  |
| C | 5.60036845000168  | 1.48863133227491  | 0.29694858756190  |
| C | 3.36561965947128  | 2.16494205353533  | 1.33679810548463  |
| C | 7.71682754260286  | 0.93692655879114  | -0.83384144756374 |
| H | 2.53283676678423  | -4.98284957862442 | -5.64142278116815 |
| H | 1.85309127846231  | -4.75685533163674 | -7.26543929468472 |
| H | 3.37069909053322  | -3.94597067148738 | -6.82568609588506 |
| H | 0.87885397037019  | -2.61075047987851 | -7.99945683508955 |
| H | 0.73404092920103  | -1.22723362796669 | -6.89253315230726 |
| H | 2.33215614987014  | -1.69597994635291 | -7.51774448113423 |
| H | 0.30315233381986  | -4.27175279144133 | -4.67649488683060 |
| H | -0.45538297987457 | -2.73133831430572 | -5.13249845783201 |
| H | -0.34255566960015 | -4.05278617756059 | -6.31929383387082 |
| O | -1.47057606865833 | 1.62721694157208  | -1.03215244028726 |
| C | -2.28724280695715 | 3.16946982786787  | 0.60198633063363  |
| H | 0.83593788670028  | 5.43156892583353  | -0.07019450224946 |
| C | -0.86254408531353 | 5.08948932877044  | 1.21828500510245  |
| O | 2.23303874766532  | 0.11324216408918  | 1.83976982374042  |
| N | -0.03181751257435 | -0.10746589024858 | 0.49322371784865  |
| N | 2.03625331485001  | -1.87594917771950 | 0.24356511175395  |
| C | 6.36269546677905  | 2.07489152143221  | 1.33974083131478  |
| C | 3.51403890915058  | 3.57564720048059  | 1.55932515932611  |
| C | 2.39395818492940  | 1.49047556475787  | 2.06574170928490  |
| H | 8.23534601622047  | 0.47204650181468  | -1.67449299092643 |
| C | 8.42651797875146  | 1.53941109990112  | 0.18219683507213  |
| P | -1.38507662291942 | 0.21400220374781  | -0.24329287162203 |
| C | -3.56414898591220 | 2.41348959065376  | 0.69348012407200  |

|   |                   |                   |                   |
|---|-------------------|-------------------|-------------------|
| C | -2.03817067075094 | 4.30115356898050  | 1.44758028383357  |
| C | -0.59617421125330 | 6.19791626405098  | 2.06498036989750  |
| S | 2.78282756271703  | -2.84904791794198 | 1.35250412188977  |
| H | 1.32232556552217  | -2.60834260583727 | -0.64025035408965 |
| C | 7.74117204904434  | 2.09872656153314  | 1.28432772021725  |
| H | 5.84717971884846  | 2.49731887844090  | 2.20068379820036  |
| C | 4.37702976653450  | 4.39712974519466  | 0.78555415617617  |
| C | 2.71314556322491  | 4.20190873449963  | 2.57123003500079  |
| C | 1.54830985519184  | 2.09502169078702  | 3.03555212158852  |
| H | 9.51645017443481  | 1.56914608464755  | 0.14706546271974  |
| O | -2.37614239996699 | 0.36380933415293  | 1.03219649901803  |
| N | -1.89246198451745 | -0.91132394831383 | -1.24249580967814 |
| C | -3.59162409087294 | 1.04396920813622  | 0.92601982322726  |
| C | -4.81108539861357 | 3.10812958387822  | 0.53400024276888  |
| C | -2.87558364236623 | 4.63850191771183  | 2.54286801469373  |
| H | 0.29648753075546  | 6.79488693716672  | 1.86933606687337  |
| C | -1.43048944854928 | 6.50067137392857  | 3.11913559592935  |
| O | 2.86004322070678  | -4.15084538297030 | 0.70522888018310  |
| O | 2.20218277579181  | -2.71725030661130 | 2.67874861742950  |
| H | 8.30571573470409  | 2.54092106813755  | 2.10609625257253  |
| H | 4.95957077668001  | 3.94823431657812  | -0.01726684935196 |
| C | 4.47693539469518  | 5.75199852225968  | 1.02596938412380  |
| C | 2.86155701332861  | 5.59399056541188  | 2.81297976331298  |
| C | 1.75913863905440  | 3.44210011709794  | 3.28372785880909  |
| C | 0.45039402391638  | 1.37245275112561  | 3.71726966529968  |
| S | -2.36596637776206 | -0.85882990387623 | -2.76844131892012 |
| C | -4.79406530874909 | 0.32123210305289  | 1.19028877184222  |
| C | -6.03192215186679 | 2.40120647436493  | 0.78370408501250  |
| C | -4.89166197834865 | 4.45464434719503  | 0.09321891458366  |
| C | -2.57400690913042 | 5.70571706730120  | 3.36378525061687  |
| H | -3.75558519567543 | 4.02868514205907  | 2.74388679193468  |
| H | -1.21023093107285 | 7.34947287396222  | 3.76834843188055  |
| H | 5.14094939322743  | 6.36094184207538  | 0.41081364345640  |
| C | 3.72616481120021  | 6.35712355501109  | 2.05985241273261  |
| H | 2.25758753266408  | 6.04807775849686  | 3.60090990606200  |
| H | 1.15017894055937  | 3.94346025110637  | 4.03781693769758  |
| C | 0.56903696738558  | 0.06771692391216  | 4.22531693797036  |
| C | -0.77741277725785 | 2.02758677883930  | 3.88847137394978  |
| O | -1.45423991032081 | -0.12174925731056 | -3.63886874953583 |
| O | -2.70709238265148 | -2.23652130049261 | -3.14462404597780 |
| C | -5.98026367572072 | 1.03620910498022  | 1.14252963375995  |
| C | -4.83983501490238 | -1.12176041424241 | 1.52292759957259  |
| C | -7.27226355083163 | 3.07403289489198  | 0.62544274181310  |
| C | -6.11258370621097 | 5.07667314242731  | -0.06609576285106 |
| H | -3.97573214157494 | 4.99323731590316  | -0.14421222333957 |
| H | -3.22274749144509 | 5.93626788239912  | 4.21003880715343  |
| H | 3.82593694105313  | 7.42668647104866  | 2.25042779946102  |
| C | -0.49362789246003 | -0.52887451837600 | 4.89817031534066  |
| H | 1.49444433458116  | -0.49237692899986 | 4.10194032236245  |
| C | -1.84107890815190 | 1.41526487104260  | 4.54618857696283  |
| H | -0.91524198845309 | 3.02596863376672  | 3.47448381431720  |
| H | -6.91771806557488 | 0.50750446162288  | 1.32313419993303  |
| C | -5.66555002039189 | -1.57074853323268 | 2.56931390607041  |
| C | -4.15652271254962 | -2.09027489919638 | 0.77876387238098  |
| H | -8.19249662512451 | 2.51894702419180  | 0.81731835826263  |
| C | -7.31476558259631 | 4.38758511610775  | 0.21172904492340  |
| H | -6.14967378759572 | 6.10548619844053  | -0.42655237416915 |
| F | 6.55500268469040  | -1.24253405913641 | 5.09663226822712  |

|   |                   |                   |                   |
|---|-------------------|-------------------|-------------------|
| C | -1.72412499043938 | 0.12548090361946  | 5.08031226033592  |
| H | -0.34810939478351 | -1.53608008059189 | 5.29211324051225  |
| H | -2.77740848115289 | 1.96552346263050  | 4.63420470022230  |
| C | -5.78269423217896 | -2.92693954286012 | 2.85664633346207  |
| H | -6.20313408399107 | -0.84285039177012 | 3.18015622772322  |
| C | -4.28939951790007 | -3.44911184929917 | 1.06115142624411  |
| H | -3.51181280716458 | -1.79029706100584 | -0.04413084815682 |
| H | -8.27314937464053 | 4.89255930654775  | 0.08288226364123  |
| C | 6.59735443291181  | -0.42166061435448 | 4.00813363820627  |
| C | -2.84856803413238 | -0.53542744134740 | 5.88556270871242  |
| C | -5.09431246629676 | -3.90085345295403 | 2.11281772570144  |
| H | -6.41905392067861 | -3.22930546754157 | 3.69058472205464  |
| H | -3.73690566522088 | -4.15355909249715 | 0.43986181147372  |
| F | 7.85851307031875  | 0.07591959093158  | 3.93502160453489  |
| C | 6.19057440079306  | -1.15836903537704 | 2.75649845124304  |
| F | 5.76144954885299  | 0.62058114214374  | 4.27570882531745  |
| C | -3.10254330041769 | -1.97243650049764 | 5.39440404600869  |
| C | -4.16808496936914 | 0.24356518197743  | 5.77964705078595  |
| C | -2.41617808542914 | -0.57757603266848 | 7.36689296693766  |
| C | -5.22960537404381 | -5.38413152439290 | 2.46695127346276  |
| C | 7.14100342012216  | -1.53578773646694 | 1.80790087905585  |
| C | 4.84990111231653  | -1.51640434017820 | 2.60123613714242  |
| H | -2.20497962815441 | -2.59913434293664 | 5.48494067525887  |
| H | -3.89342541573227 | -2.44097260245654 | 5.99935479167684  |
| H | -3.43335645234123 | -1.98424598120130 | 4.34741150906560  |
| H | -4.08615971027790 | 1.25128938997739  | 6.21168207116232  |
| H | -4.49571889248935 | 0.33843790060124  | 4.73424562934532  |
| H | -4.95457651011033 | -0.28993490397880 | 6.33286470186865  |
| H | -2.23400128727307 | 0.43664588257838  | 7.75066436570713  |
| H | -3.20152185644018 | -1.04482224689236 | 7.98080944763664  |
| H | -1.49132601558465 | -1.15786355210283 | 7.49384975623546  |
| C | -4.79578414278094 | -5.59794861269586 | 3.93184732153886  |
| C | -4.35361015515502 | -6.27182929544879 | 1.57051935955998  |
| C | -6.70155927455867 | -5.81237091204492 | 2.30068977089997  |
| C | 6.73982649931658  | -2.27037130982190 | 0.69028789479906  |
| H | 8.18464574440382  | -1.25666994789333 | 1.93522918488787  |
| C | 4.46992063672590  | -2.24668076580065 | 1.47847589528634  |
| H | 4.10430320265470  | -1.25349377012838 | 3.34990278101440  |
| H | -5.41434047284459 | -5.01640499485285 | 4.62959791823563  |
| H | -4.88826649048421 | -6.66062878207873 | 4.20295848717604  |
| H | -3.74832393608833 | -5.29611584051888 | 4.07257901710870  |
| H | -4.48037049848078 | -7.32438978395203 | 1.86373905657180  |
| H | -4.62945710770489 | -6.18183333561511 | 0.51014300614000  |
| H | -3.28786103329753 | -6.01999936947408 | 1.66753885614235  |
| H | -7.36903476325282 | -5.22618086804759 | 2.94801086055335  |
| H | -7.03212025260628 | -5.67430342502409 | 1.26115794166877  |
| H | -6.82100410393997 | -6.87470180421007 | 2.56287966790457  |
| C | 5.40170924816727  | -2.62752346097023 | 0.51440686950298  |
| C | 7.76065306811194  | -2.76126661350850 | -0.30502553764471 |
| H | 5.08372390852186  | -3.22194220264216 | -0.34200247554997 |
| F | 7.34560211150341  | -2.58103672848391 | -1.59385495753882 |
| F | 7.99000529620004  | -4.09685286845875 | -0.15833227644021 |
| F | 8.95784790352006  | -2.13512591960335 | -0.17834503246781 |
| C | -5.08238736168020 | -0.55229121151567 | -2.31816186259841 |
| C | -3.90990293520503 | 0.06022855485256  | -2.76242246737015 |
| H | -5.07199788228081 | -1.59517114132398 | -2.00324656888960 |
| C | -6.25958777687146 | 0.19425095489397  | -2.27714554421903 |
| C | -3.90719556109720 | 1.38556657871290  | -3.18518953943324 |

|   |                   |                   |                   |
|---|-------------------|-------------------|-------------------|
| C | -6.27302638299742 | 1.53250900562472  | -2.68189926516594 |
| C | -7.54438675157961 | -0.46602623061124 | -1.84275100855667 |
| C | -5.09526270573297 | 2.11918195730558  | -3.14079929842168 |
| H | -2.98250099975424 | 1.83118400921748  | -3.54812228321311 |
| H | -7.19173182637436 | 2.11401044290011  | -2.62955151214807 |
| F | -8.20018074545036 | -1.01971019812746 | -2.90380554579434 |
| F | -8.40696879722113 | 0.42177467501970  | -1.27109086679046 |
| F | -7.33317499607530 | -1.46034622931473 | -0.94456454126308 |
| C | -5.08041019527228 | 3.54123401816154  | -3.64159759029449 |
| F | -4.03176603913484 | 4.24505756563559  | -3.12928692377131 |
| F | -4.94742100918278 | 3.58253950349021  | -4.99981313697587 |
| F | -6.21578241134871 | 4.21586940026496  | -3.33263507736292 |
| H | -2.54665088467431 | -3.88479785918243 | -2.22895215523996 |
| H | -1.39253916825699 | -5.15987914488876 | -3.51711472727623 |
| H | -0.47042232209341 | -7.34256130648161 | -2.52195944025223 |
| H | 1.17412269581512  | -6.29354281553925 | -0.96327226011490 |

228

TS1-2'

|   |           |           |           |
|---|-----------|-----------|-----------|
| C | -1.241367 | -1.829752 | 3.850322  |
| C | -1.422670 | -2.807840 | 4.966844  |
| C | -2.915829 | -3.206462 | 5.136299  |
| C | -3.602267 | -3.668036 | 3.856223  |
| O | -3.901079 | -2.535518 | 3.040398  |
| H | -0.839987 | -3.710494 | 4.735912  |
| H | -3.488423 | -2.356687 | 5.539667  |
| H | -4.534102 | -4.202513 | 4.121602  |
| C | -1.495839 | -0.407573 | 4.074932  |
| C | -1.327818 | 0.529304  | 3.033871  |
| C | -1.857119 | 0.081770  | 5.348032  |
| C | -1.508405 | 1.888791  | 3.251195  |
| H | -1.040232 | 0.195479  | 2.041158  |
| C | -2.042319 | 1.443635  | 5.565097  |
| H | -1.985168 | -0.606548 | 6.182351  |
| C | -1.868785 | 2.352679  | 4.517749  |
| H | -1.361997 | 2.587604  | 2.428184  |
| H | -2.318424 | 1.799805  | 6.558492  |
| H | -2.005105 | 3.421063  | 4.689291  |
| C | -0.777170 | -2.307873 | 2.629251  |
| H | -0.619515 | -3.385026 | 2.535500  |
| H | -1.129114 | -1.828826 | 1.709430  |
| H | 1.523781  | -6.660347 | -4.370763 |
| C | 2.189413  | -6.692142 | -3.496146 |
| C | 3.276372  | -5.609877 | -3.561151 |
| H | 2.661534  | -7.684958 | -3.474790 |
| H | 1.577211  | -6.590645 | -2.587896 |
| C | 2.684081  | -4.197426 | -3.556674 |
| C | 4.087128  | -5.795325 | -4.860936 |
| C | 4.209332  | -5.798853 | -2.347768 |
| C | 1.602129  | -4.268859 | -0.075998 |
| C | 1.308887  | -3.947799 | -3.651011 |
| C | 3.527010  | -3.076145 | -3.472216 |
| H | 4.531012  | -6.802052 | -4.892802 |
| H | 3.444153  | -5.672481 | -5.744503 |
| H | 4.901967  | -5.060929 | -4.931051 |
| H | 3.651628  | -5.700805 | -1.406625 |
| H | 4.660962  | -6.801915 | -2.378366 |
| H | 5.025755  | -5.064018 | -2.334941 |
| C | 2.702521  | -4.141022 | 0.786704  |

|   |           |           |           |
|---|-----------|-----------|-----------|
| C | 0.532555  | -5.104485 | 0.240019  |
| H | 1.576036  | -3.722135 | -1.015466 |
| C | 0.794603  | -2.650961 | -3.645750 |
| H | 0.603873  | -4.775691 | -3.713715 |
| C | 3.022538  | -1.782290 | -3.469134 |
| H | 4.607031  | -3.211902 | -3.390479 |
| C | 3.855303  | -3.258126 | 0.505241  |
| C | 2.679255  | -4.878755 | 1.982533  |
| C | 0.510443  | -5.854714 | 1.425426  |
| H | -0.303635 | -5.143519 | -0.457322 |
| C | 1.640425  | -1.535473 | -3.549509 |
| H | -0.282466 | -2.518875 | -3.716220 |
| H | 3.714489  | -0.946834 | -3.367913 |
| C | 3.693087  | -1.953448 | -0.031188 |
| C | 5.146374  | -3.626191 | 0.841302  |
| C | 1.611918  | -5.719432 | 2.286947  |
| H | 3.489551  | -4.753807 | 2.702293  |
| C | -0.630121 | -6.827354 | 1.744634  |
| C | 1.140421  | -0.143105 | -3.586922 |
| O | 2.394327  | -1.562148 | -0.390359 |
| C | 4.712147  | -1.029936 | -0.195086 |
| H | 5.329947  | -4.631460 | 1.224988  |
| C | 6.230954  | -2.721645 | 0.766930  |
| H | 1.639898  | -6.268069 | 3.229042  |
| C | -0.947669 | -6.837600 | 3.251773  |
| C | -0.177517 | -8.242008 | 1.322237  |
| C | -1.917526 | -6.468871 | 0.985014  |
| C | -0.129714 | 0.249037  | -3.071990 |
| C | 1.896234  | 0.860833  | -4.176281 |
| P | 1.657081  | -0.569898 | 0.635546  |
| C | 6.018442  | -1.387606 | 0.281806  |
| C | 4.445759  | 0.291024  | -0.821322 |
| C | 7.525028  | -3.094414 | 1.217313  |
| H | -0.106512 | -7.205149 | 3.854962  |
| H | -1.207094 | -5.830386 | 3.609249  |
| H | -1.805248 | -7.497985 | 3.446770  |
| H | 0.041123  | -8.274283 | 0.245167  |
| H | 0.731478  | -8.543686 | 1.862602  |
| H | -0.968215 | -8.977641 | 1.536311  |
| H | -2.248739 | -5.441621 | 1.192114  |
| H | -1.798481 | -6.560552 | -0.102769 |
| H | -2.724196 | -7.153566 | 1.285077  |
| O | -0.884092 | -0.704373 | -2.361413 |
| C | -0.679896 | 1.510962  | -3.235818 |
| H | 2.866171  | 0.611026  | -4.609043 |
| C | 1.463038  | 2.204308  | -4.237278 |
| O | 2.620326  | 0.724517  | 0.698328  |
| N | 0.251540  | -0.273356 | 0.053573  |
| N | 1.569528  | -1.078406 | 2.172409  |
| C | 7.095790  | -0.466658 | 0.344434  |
| C | 5.238042  | 0.740088  | -1.933460 |
| C | 3.435994  | 1.131584  | -0.364942 |
| H | 7.676616  | -4.115922 | 1.572163  |
| C | 8.558441  | -2.183402 | 1.239047  |
| P | -1.070054 | -0.461575 | -0.771256 |
| C | -2.094893 | 1.785427  | -2.873393 |
| C | 0.154526  | 2.549274  | -3.766221 |
| C | 2.303028  | 3.224589  | -4.757231 |

|   |           |           |           |
|---|-----------|-----------|-----------|
| S | 2.636937  | -1.002619 | 3.431724  |
| H | 0.416442  | -1.734685 | 2.513104  |
| C | 8.333187  | -0.853906 | 0.816734  |
| H | 6.935295  | 0.563608  | 0.030368  |
| C | 6.146729  | -0.110372 | -2.617299 |
| C | 5.074026  | 2.080316  | -2.412922 |
| C | 3.252540  | 2.466946  | -0.826173 |
| H | 9.543992  | -2.479351 | 1.601226  |
| O | -1.696075 | 1.035487  | -0.638424 |
| N | -2.071383 | -1.535786 | -0.186748 |
| C | -2.566717 | 1.571352  | -1.585763 |
| C | -3.000957 | 2.302763  | -3.858496 |
| C | -0.234687 | 3.913180  | -3.781991 |
| H | 3.291862  | 2.943957  | -5.125492 |
| C | 1.891588  | 4.539246  | -4.769223 |
| O | 3.860459  | -1.737846 | 3.160237  |
| O | 1.836027  | -1.332154 | 4.602001  |
| H | 9.141225  | -0.123087 | 0.871668  |
| H | 6.257549  | -1.142093 | -2.286352 |
| C | 6.873004  | 0.345787  | -3.698024 |
| C | 5.854642  | 2.527172  | -3.511955 |
| C | 4.107290  | 2.919183  | -1.815031 |
| C | 2.193644  | 3.366583  | -0.312900 |
| S | -2.881105 | -2.753059 | -0.832181 |
| C | -3.845548 | 2.012963  | -1.136282 |
| C | -4.310552 | 2.710969  | -3.443193 |
| C | -2.671538 | 2.390746  | -5.235685 |
| C | 0.617689  | 4.885274  | -4.261924 |
| H | -1.210279 | 4.191846  | -3.386290 |
| H | 2.549957  | 5.317292  | -5.159034 |
| H | 7.554450  | -0.331695 | -4.214523 |
| C | 6.738993  | 1.680505  | -4.143945 |
| H | 5.726569  | 3.556315  | -3.854212 |
| H | 3.977102  | 3.932437  | -2.198152 |
| C | 2.485430  | 4.687252  | 0.055599  |
| C | 0.852232  | 2.963980  | -0.287239 |
| O | -2.040223 | -3.664064 | -1.600979 |
| O | -3.707422 | -3.311997 | 0.245299  |
| C | -4.676101 | 2.591150  | -2.083783 |
| C | -4.304564 | 1.918578  | 0.268737  |
| C | -5.223965 | 3.207253  | -4.410407 |
| C | -3.584026 | 2.870126  | -6.152342 |
| H | -1.692067 | 2.053021  | -5.570913 |
| H | 0.306954  | 5.930971  | -4.246184 |
| H | 7.327137  | 2.032239  | -4.992712 |
| C | 1.465942  | 5.577248  | 0.404435  |
| H | 3.524601  | 5.023139  | 0.070246  |
| C | -0.156653 | 3.855370  | 0.051913  |
| H | 0.587486  | 1.951886  | -0.574684 |
| H | -5.672638 | 2.916014  | -1.780243 |
| C | -4.176418 | 0.756883  | 1.040526  |
| C | -4.978555 | 3.010271  | 0.846314  |
| H | -6.219661 | 3.508481  | -4.078602 |
| C | -4.869322 | 3.288459  | -5.739404 |
| H | -3.315598 | 2.911238  | -7.208791 |
| F | 2.276088  | 5.170623  | 5.022613  |
| C | 0.119263  | 5.188266  | 0.391927  |
| H | 1.738424  | 6.595011  | 0.682880  |



|   |           |           |           |
|---|-----------|-----------|-----------|
| H | -1.188113 | 3.501881  | 0.022849  |
| C | -4.740990 | 0.668171  | 2.313108  |
| H | -3.644141 | -0.106296 | 0.645920  |
| C | -5.530922 | 2.919630  | 2.119564  |
| H | -5.062856 | 3.944674  | 0.287623  |
| H | -5.581274 | 3.663502  | -6.475980 |
| C | 1.634463  | 4.037153  | 4.631169  |
| C | -1.039812 | 6.149164  | 0.675157  |
| C | -5.444048 | 1.739136  | 2.877361  |
| H | -4.618317 | -0.268251 | 2.856998  |
| H | -6.049982 | 3.790215  | 2.524804  |
| F | 0.710917  | 4.411166  | 3.698857  |
| C | 2.587957  | 3.004613  | 4.084429  |
| F | 0.945265  | 3.571042  | 5.706313  |
| C | -1.941704 | 5.585400  | 1.792112  |
| C | -1.874844 | 6.293189  | -0.616276 |
| C | -0.549717 | 7.538680  | 1.102833  |
| C | -6.137955 | 1.643823  | 4.239432  |
| C | 3.833570  | 3.405661  | 3.598306  |
| C | 2.206997  | 1.661240  | 4.048271  |
| H | -2.778845 | 6.274387  | 1.981365  |
| H | -2.373689 | 4.612145  | 1.521286  |
| H | -1.378469 | 5.465015  | 2.727745  |
| H | -2.290525 | 5.326021  | -0.933450 |
| H | -2.713682 | 6.986809  | -0.452501 |
| H | -1.258393 | 6.683636  | -1.439244 |
| H | 0.053410  | 8.018588  | 0.318344  |
| H | -1.413084 | 8.189431  | 1.302915  |
| H | 0.052976  | 7.488685  | 2.021588  |
| C | -5.700160 | 2.812593  | 5.144028  |
| C | -5.814175 | 0.326611  | 4.959419  |
| C | -7.662981 | 1.720689  | 4.014875  |
| C | 4.721879  | 2.449683  | 3.104549  |
| H | 4.118496  | 4.455709  | 3.626767  |
| C | 3.103747  | 0.727356  | 3.532984  |
| H | 1.232288  | 1.342864  | 4.418329  |
| H | -5.951903 | 3.788032  | 4.705527  |
| H | -6.206108 | 2.744059  | 6.118937  |
| H | -4.615393 | 2.785716  | 5.315263  |
| H | -6.322516 | 0.307722  | 5.934722  |
| H | -6.151461 | -0.548503 | 4.386505  |
| H | -4.734202 | 0.220909  | 5.134424  |
| H | -7.949223 | 2.663723  | 3.527983  |
| H | -8.004789 | 0.893652  | 3.376206  |
| H | -8.193978 | 1.657579  | 4.977122  |
| C | 4.366259  | 1.100859  | 3.076174  |
| C | 6.060200  | 2.875049  | 2.554235  |
| H | 5.050095  | 0.341152  | 2.697547  |
| F | 6.454294  | 4.082489  | 3.038883  |
| F | 6.024009  | 2.990925  | 1.192011  |
| F | 7.037823  | 1.979156  | 2.845814  |
| C | -3.638980 | -1.930331 | -3.345459 |
| C | -4.004343 | -1.982161 | -2.003410 |
| H | -2.722390 | -2.418259 | -3.672805 |
| C | -4.453844 | -1.243812 | -4.248157 |
| C | -5.185765 | -1.391215 | -1.554059 |
| C | -5.624749 | -0.623874 | -3.815633 |
| C | -4.053114 | -1.215217 | -5.701485 |

|   |           |           |           |
|---|-----------|-----------|-----------|
| C | -5.988752 | -0.709317 | -2.468729 |
| H | -5.464496 | -1.453380 | -0.502923 |
| H | -6.243439 | -0.069334 | -4.518974 |
| F | -4.227821 | -2.436786 | -6.285115 |
| F | -2.736401 | -0.898423 | -5.853174 |
| F | -4.774600 | -0.321851 | -6.422964 |
| C | -7.287044 | -0.094623 | -2.008447 |
| F | -7.630719 | 0.991705  | -2.757811 |
| F | -8.319422 | -0.981592 | -2.110184 |
| F | -7.235401 | 0.306928  | -0.714184 |
| H | -3.833588 | -2.800378 | 2.095401  |
| H | -2.961350 | -4.383669 | 3.311881  |
| H | -2.961585 | -4.013886 | 5.883877  |
| H | -1.044108 | -2.410751 | 5.919204  |

228

TS1-3'

|   |                   |                   |                   |
|---|-------------------|-------------------|-------------------|
| C | -0.20760560643525 | -3.35153875511674 | -2.89580763102848 |
| C | -0.00031610808882 | -4.12841192505947 | -4.15641012995329 |
| C | -1.34298592932869 | -4.39190380344053 | -4.89400943937952 |
| C | -2.21171292642461 | -3.15571403356906 | -5.09321542078389 |
| O | -2.83434464522066 | -2.80131079622505 | -3.85780382542032 |
| H | 0.65861633108891  | -3.54674692555536 | -4.81547047495867 |
| H | -1.93736241190664 | -5.13506163035865 | -4.33983205808451 |
| H | -2.98343726423800 | -3.37854870339141 | -5.85384521351249 |
| C | -0.61234265597763 | -4.03914107512709 | -1.66951768564295 |
| C | -0.76943954318949 | -3.32896189650073 | -0.46114166116145 |
| C | -0.80607974778874 | -5.43682523485738 | -1.64237968586125 |
| C | -1.10251962680379 | -3.98129948779715 | 0.71911478276729  |
| H | -0.62244770204030 | -2.25277066940276 | -0.43510941594208 |
| C | -1.14674422337127 | -6.08925894241662 | -0.46183465889548 |
| H | -0.68590431437798 | -6.02275666516861 | -2.55257388639068 |
| C | -1.29495802065425 | -5.36409016825058 | 0.72364488500652  |
| H | -1.20976916052936 | -3.40030012731918 | 1.63524352399625  |
| H | -1.29181863852988 | -7.17024219498446 | -0.46302993134033 |
| H | -1.55232959105407 | -5.87999075372892 | 1.64968253790964  |
| C | 0.05296003768513  | -1.98622515835953 | -2.91321742484749 |
| H | 0.34839041816841  | -1.53856272568554 | -3.86508459923047 |
| H | -0.54744043836972 | -1.32720284974178 | -2.27423170768933 |
| H | 5.33236542099059  | 4.33950723643367  | -2.92995423971369 |
| C | 4.68293604528600  | 4.40430887705419  | -3.81345624412377 |
| C | 3.48949281131830  | 5.35421486626322  | -3.58863492266009 |
| H | 4.33477872087480  | 3.39054581707565  | -4.05228784079922 |
| H | 5.29385949800531  | 4.76657997892146  | -4.65407602171349 |
| C | 2.66614177595906  | 4.89239087557585  | -2.38234220171047 |
| C | 2.65802982534186  | 5.38410901742876  | -4.87902181569841 |
| C | 4.01676419865588  | 6.77616277227185  | -3.30356360232357 |
| C | 2.22253669032869  | 1.44292300093240  | -3.58499798688411 |
| C | 3.28597276365569  | 4.68042936257319  | -1.13921044548063 |
| C | 1.28213574582090  | 4.68360399583642  | -2.44214967117947 |
| H | 2.25119909596071  | 4.39029238252650  | -5.11750974917840 |
| H | 1.82302176227291  | 6.09662554964383  | -4.81396660235688 |
| H | 3.29597553995780  | 5.69695617839282  | -5.71823440053216 |
| H | 4.65159442090367  | 6.79419674499705  | -2.40636169568883 |
| H | 4.61595928407541  | 7.13758168076931  | -4.15323600897454 |
| H | 3.18510109422764  | 7.47756639548837  | -3.14356461187113 |
| C | 3.45499872424470  | 0.78694841050837  | -3.44635322799802 |
| C | 1.41136615637820  | 1.22202817003058  | -4.69749819525076 |
| H | 1.88741611154110  | 2.14789384614231  | -2.82769979463835 |

|   |                   |                   |                   |
|---|-------------------|-------------------|-------------------|
| C | 2.56349712745245  | 4.28143423251416  | -0.02144951922351 |
| H | 4.36381890356896  | 4.82008953288422  | -1.03720955147044 |
| C | 0.55200149798077  | 4.27537562761758  | -1.32656902667849 |
| H | 0.74589073235105  | 4.82323569713563  | -3.37982257491766 |
| C | 4.35452593560984  | 0.98896575522081  | -2.28997996384175 |
| C | 3.83277700064164  | -0.10974735076232 | -4.46180517195393 |
| C | 1.78996658351420  | 0.34175638146847  | -5.72034535082507 |
| H | 0.45685421844882  | 1.74394240656370  | -4.73806148247420 |
| C | 1.17712723137140  | 4.06462051952131  | -0.08840353259056 |
| H | 3.09048802115552  | 4.11023691582299  | 0.91613622589516  |
| H | -0.51908195842282 | 4.12160569209997  | -1.43384843877400 |
| C | 3.871111178220327 | 1.07466307150077  | -0.95744594588636 |
| C | 5.72971868794730  | 1.01748141780577  | -2.45023137574178 |
| C | 3.02137637125006  | -0.31908415928491 | -5.57239553123940 |
| H | 4.75573150601207  | -0.68084559407044 | -4.35244252322166 |
| C | 0.93528463277427  | 0.13089304567611  | -6.97462867732834 |
| C | 0.41703293355726  | 3.71024052765271  | 1.13067477619508  |
| O | 2.47785620792570  | 1.05332448940448  | -0.77069607617851 |
| C | 4.67967822332622  | 1.14704840586035  | 0.16776904145312  |
| H | 6.14635866022063  | 0.99074235853258  | -3.45874301438372 |
| C | 6.61834128967591  | 1.01825690275106  | -1.35107436895272 |
| H | 3.35676811385360  | -1.02584108200823 | -6.33311959837043 |
| C | -0.48191102062658 | 0.70044748633512  | -6.80899285182498 |
| C | 0.81559943124833  | -1.36948432476364 | -7.30426517814224 |
| C | 1.62722860221146  | 0.84836758787690  | -8.15333550570558 |
| C | -0.74982220354306 | 2.89228010991928  | 1.10459488274407  |
| C | 0.77844977670752  | 4.22317130850604  | 2.36685289226204  |
| P | 1.83773009439055  | -0.31475767304268 | -0.20888183744925 |
| C | 6.09678285461932  | 1.04374883459564  | -0.01486496549887 |
| C | 4.07227687027006  | 1.29881262104469  | 1.51527017276267  |
| C | 8.02385069710080  | 0.94324712797836  | -1.54086496631621 |
| H | -1.07206454260442 | 0.48382079630881  | -7.71141870134471 |
| H | -1.00642133993942 | 0.26456517528938  | -5.94629291414120 |
| H | -0.47251668887047 | 1.79122163781657  | -6.67613819204701 |
| H | 1.79135227147393  | -1.83198580319099 | -7.50499739682982 |
| H | 0.34603379123778  | -1.91663648253534 | -6.47449619124675 |
| H | 0.19024845668591  | -1.50858770374851 | -8.19861502063620 |
| H | 1.71855874607329  | 1.92550282729618  | -7.95222199757143 |
| H | 2.63722813546502  | 0.44899667259926  | -8.32454624582419 |
| H | 1.04357009603259  | 0.71786437848992  | -9.07763658074996 |
| O | -1.07810271756451 | 2.26027372084651  | -0.10184601071857 |
| C | -1.60658927804652 | 2.72136514065048  | 2.18029871595329  |
| H | 1.65851604570767  | 4.86399554144285  | 2.44124971087378  |
| C | 0.03927243037965  | 3.95659228338106  | 3.54233634421224  |
| O | 2.72728687339345  | -0.64030379960698 | 1.09690720795135  |
| N | 0.34488746143500  | -0.04258737987848 | 0.12949370980375  |
| N | 2.04742536437123  | -1.62060693933248 | -1.15383891722999 |
| C | 7.00295240538098  | 0.91419310313380  | 1.06969584190824  |
| C | 4.42302043493492  | 2.39090138696939  | 2.37809968182812  |
| C | 3.09506297300434  | 0.41481711243902  | 1.94893486263158  |
| H | 8.41074229535132  | 0.93829422625320  | -2.56201529300557 |
| C | 8.88019162420728  | 0.84719381021888  | -0.46574030882052 |
| P | -1.03682490196405 | 0.64347357328196  | -0.18298916613063 |
| C | -2.93608072732953 | 2.07916316878568  | 2.00298173618524  |
| C | -1.18651877138542 | 3.21661079962334  | 3.45872527132605  |
| C | 0.48148574795397  | 4.42188785719069  | 4.80923622198913  |
| S | 3.33588322693705  | -2.62983781493638 | -1.34767666855011 |
| H | 1.08893996583771  | -1.87190913701298 | -2.09614217341325 |

|   |                   |                   |                   |
|---|-------------------|-------------------|-------------------|
| C | 8.36113707105937  | 0.81365555773167  | 0.84884448951616  |
| H | 6.61296988749358  | 0.87997702460577  | 2.08670278648236  |
| C | 5.32303906032204  | 3.41991525560787  | 1.99292569437138  |
| C | 3.79423013491300  | 2.48627910540196  | 3.66378657623971  |
| C | 2.44429714021060  | 0.49288601907199  | 3.21010709430054  |
| H | 9.95690438879324  | 0.77646788157508  | -0.62630536741890 |
| O | -1.90891158198370 | 0.12254793634138  | 1.08526644977898  |
| N | -1.71790011020646 | 0.22182975101533  | -1.55253348625361 |
| C | -3.06795245479978 | 0.79781886256588  | 1.47952069206059  |
| C | -4.12210751035825 | 2.80243746176567  | 2.36579208730497  |
| C | -1.89999297118484 | 2.95108224667540  | 4.65657269165351  |
| H | 1.41178547661707  | 4.99153718737541  | 4.85461216284901  |
| C | -0.23334186888534 | 4.14546685603947  | 5.95451714135886  |
| O | 4.57741849575203  | -1.91181759657697 | -1.57850519335047 |
| O | 2.87741798858468  | -3.62770662923419 | -2.30376372632477 |
| H | 9.03898096758209  | 0.70039482609514  | 1.69608973765493  |
| H | 5.78109607257366  | 3.38114667021615  | 1.00587160187250  |
| C | 5.60933339665541  | 4.46950954499839  | 2.84128779658470  |
| C | 4.12835356289272  | 3.56770982816741  | 4.52215890610193  |
| C | 2.83049584158921  | 1.52653302236145  | 4.04664219639922  |
| C | 1.37435344699291  | -0.44222918734963 | 3.62063570638030  |
| S | -2.31422004782702 | 1.06507315111400  | -2.77192211216328 |
| C | -4.31144804839414 | 0.09670753397976  | 1.43652555909184  |
| C | -5.38261955373528 | 2.12432541006735  | 2.32020585279047  |
| C | -4.11022255469310 | 4.17622337411974  | 2.72202290085158  |
| C | -1.43010837666643 | 3.39630538872631  | 5.87513970843966  |
| H | -2.81957813585939 | 2.36908353070224  | 4.60642540066056  |
| H | 0.12215972248314  | 4.49956212368018  | 6.92331036043206  |
| H | 6.29696616262960  | 5.25223610400916  | 2.51779255929393  |
| C | 5.01761452518980  | 4.54133864943515  | 4.12340780708838  |
| H | 3.65221738024635  | 3.61470738195839  | 5.50364442389559  |
| H | 2.36425920000280  | 1.61464330253243  | 5.02945141849107  |
| C | 1.45974327892707  | -1.82911964772758 | 3.44342142668542  |
| C | 0.22725254712904  | 0.06708834594734  | 4.25042085893366  |
| O | -1.43594911010608 | 2.13788458597752  | -3.22643331740159 |
| O | -2.77274096538805 | 0.08378188182071  | -3.76459537399535 |
| C | -5.42951624884855 | 0.78125267833048  | 1.88916865998577  |
| C | -4.48927532690927 | -1.29323478319544 | 0.95238988436902  |
| C | -6.56663435169401 | 2.82698322548975  | 2.66818301908283  |
| C | -5.27866687828182 | 4.83534462718436  | 3.04312982307322  |
| H | -3.16698334980231 | 4.71991383669667  | 2.71798524601863  |
| H | -1.98548367729992 | 3.16572444358447  | 6.78539352546089  |
| H | 5.26118995469087  | 5.37061672049585  | 4.78911104131732  |
| C | 0.44253269471521  | -2.67205414144753 | 3.89270494198171  |
| H | 2.33798981716626  | -2.26257174908037 | 2.96876872838359  |
| C | -0.78979322219227 | -0.77642326660921 | 4.67803672361481  |
| H | 0.12075078320098  | 1.14322076222675  | 4.38238217567368  |
| H | -6.39943533590633 | 0.28335947430671  | 1.84680961872991  |
| C | -3.92466447316947 | -1.76967354119365 | -0.23673233947246 |
| C | -5.35376476760096 | -2.15863132269394 | 1.64862994222671  |
| H | -7.51872968926943 | 2.29448493565970  | 2.62409450905432  |
| C | -6.51799310934551 | 4.15609514036047  | 3.02741611070323  |
| H | -5.24665088352507 | 5.89634205504002  | 3.29417679805759  |
| F | 2.91816732828724  | -7.31382595710867 | 2.86097544740681  |
| C | -0.70712972188976 | -2.16908591139080 | 4.51690707816289  |
| H | 0.56201525290525  | -3.74497835000156 | 3.74938569655853  |
| H | -1.67060858811856 | -0.33138569156016 | 5.14465089496170  |
| C | -4.23834690251063 | -3.03593007182371 | -0.73274154214953 |

|   |                   |                   |                   |
|---|-------------------|-------------------|-------------------|
| H | -3.24914011525560 | -1.13948489843979 | -0.81055420134857 |
| C | -5.65160043595958 | -3.42455157853089 | 1.15809383465719  |
| H | -5.78476893270719 | -1.83608254388178 | 2.59818996786772  |
| H | -7.43395781950836 | 4.69033389361416  | 3.28367506748543  |
| C | 2.17185047025492  | -6.41484788243242 | 2.16453047448367  |
| C | -1.84779897490441 | -3.06293708299532 | 5.01162370222679  |
| C | -5.11489608567461 | -3.88995891808902 | -0.05508945194333 |
| H | -3.78614704059326 | -3.33736279909365 | -1.67746145148939 |
| H | -6.32489472114974 | -4.06143826825597 | 1.73521736257238  |
| F | 1.11250764002366  | -6.08747374664179 | 2.96789314463970  |
| C | 2.97788642169602  | -5.19824950821386 | 1.78222324279116  |
| F | 1.66543225211910  | -7.05697915160513 | 1.08374232579516  |
| C | -3.13629288847062 | -2.70035035783097 | 4.24740321029314  |
| C | -2.06272308773461 | -2.82804269638920 | 6.52071281105099  |
| C | -1.55693025359633 | -4.55394848674859 | 4.79368108139745  |
| C | -5.50754622301894 | -5.26861856102216 | -0.59275327563814 |
| C | 3.94743499422372  | -4.72510431929251 | 2.67233060911762  |
| C | 2.75208733266743  | -4.55434075736045 | 0.56400554562314  |
| H | -3.97746782682816 | -3.31503034969905 | 4.60274721046476  |
| H | -3.40571289160867 | -1.64366009154255 | 4.38430202956802  |
| H | -3.02429492282046 | -2.87467377688280 | 3.16882986740224  |
| H | -2.88431524271927 | -3.46089327710127 | 6.88901978804237  |
| H | -1.15458644388731 | -3.07614294038550 | 7.08895525727379  |
| H | -2.32076376620435 | -1.78201575358490 | 6.73550362649956  |
| H | -2.40112752247896 | -5.15128441562398 | 5.16703201105826  |
| H | -1.42666633208018 | -4.79266078227346 | 3.72896929203425  |
| H | -0.65255699414377 | -4.87784819880799 | 5.32876315504510  |
| C | -5.13220327722224 | -6.35109495773440 | 0.43952213081753  |
| C | -4.80144132768470 | -5.59272978118498 | -1.91710420376572 |
| C | -7.03145687908091 | -5.29675346521850 | -0.83085166535113 |
| C | 4.71668554092711  | -3.61524156951009 | 2.32516898248549  |
| H | 4.11537653588638  | -5.23221827516125 | 3.62122147228426  |
| C | 3.53647470969875  | -3.44763082437545 | 0.23797021804485  |
| H | 2.00023899164240  | -4.91965902505817 | -0.13503024536868 |
| H | -5.64065280816282 | -6.19095236757879 | 1.40051404663475  |
| H | -5.41947721629663 | -7.34639759959828 | 0.06750835962026  |
| H | -4.04869199265359 | -6.35056075621120 | 0.62392269582877  |
| H | -5.04775917976019 | -4.86327836929931 | -2.70161923083422 |
| H | -3.70898916349946 | -5.60519057827765 | -1.79873144565886 |
| H | -5.11734719836918 | -6.58687772126699 | -2.26624623523402 |
| H | -7.58975561011245 | -5.10538101373288 | 0.09625042390362  |
| H | -7.32450752255895 | -4.53269754825047 | -1.56513996557122 |
| H | -7.33828608517813 | -6.28146750528199 | -1.21526986410299 |
| C | 4.52681557735700  | -2.97899145708761 | 1.09698681520636  |
| C | 5.74424642797927  | -3.05376299608661 | 3.27683390214483  |
| H | 5.14100295833451  | -2.12934925549499 | 0.79967822242257  |
| F | 5.31894305634551  | -1.87301902002372 | 3.81488354495096  |
| F | 6.92288465656961  | -2.79649916190413 | 2.65041000369757  |
| F | 6.00506616668258  | -3.89357818479989 | 4.31099111888479  |
| C | -3.72738621271127 | 3.21116259003259  | -1.78622881772796 |
| C | -3.78935521238573 | 1.86384473995480  | -2.12828884517987 |
| H | -2.80363401712553 | 3.76444555115160  | -1.94755790368566 |
| C | -4.85668299399925 | 3.83135449758294  | -1.24636180013158 |
| C | -4.96446182833948 | 1.130262755613711 | -1.95986966824294 |
| C | -6.03448937605844 | 3.11232119393865  | -1.05258497659932 |
| C | -4.78594094018565 | 5.30277447759871  | -0.92471006756999 |
| C | -6.08177699019594 | 1.76290242458772  | -1.41552156634657 |
| H | -5.00164651535965 | 0.07898497429047  | -2.24271759477862 |

|        |                   |                   |                   |
|--------|-------------------|-------------------|-------------------|
| H      | -6.90543042126715 | 3.59489510354884  | -0.61259727351516 |
| F      | -5.83307935807425 | 5.72268049550941  | -0.17140328113097 |
| F      | -4.78630475016952 | 6.05512965441811  | -2.06415764092013 |
| F      | -3.64347042956087 | 5.61839523682542  | -0.25321521489985 |
| C      | -7.37246364650151 | 0.99769632478814  | -1.26233013468809 |
| F      | -7.16537762274093 | -0.32968402018802 | -1.07813284153515 |
| F      | -8.10704889338550 | 1.44519767191308  | -0.20326037123441 |
| F      | -8.16229123837756 | 1.12947570830377  | -2.36741511073624 |
| H      | -2.84620714013321 | -1.82015208872577 | -3.79054992331479 |
| H      | -1.60882006370160 | -2.31525297446784 | -5.47857201961706 |
| H      | -1.10440122297129 | -4.83223959736508 | -5.87498178493199 |
| H      | 0.50041953683885  | -5.08730206539019 | -3.96191946818667 |
| 228    |                   |                   |                   |
| TS1-4' |                   |                   |                   |
| C      | -2.89984679279618 | -3.26936275022447 | -0.10106099218057 |
| C      | -2.83103304066087 | -3.05934062890925 | 1.38076278639125  |
| C      | -1.51407105009976 | -3.46947570538706 | 2.04384032474766  |
| C      | -1.32978244711739 | -4.98469288800443 | 2.03656205947164  |
| O      | -1.40666703574306 | -5.54212430082104 | 0.72584525562789  |
| H      | -2.99835211334740 | -1.98020476820532 | 1.56094341900761  |
| H      | -1.51358385701041 | -3.11233235704965 | 3.08446394745465  |
| H      | -2.13669527552709 | -5.46079958623052 | 2.61888117501197  |
| C      | -4.13425427534634 | -3.81623836064375 | -0.66861958934271 |
| C      | -4.08319536732878 | -4.60841404903238 | -1.82940606909150 |
| C      | -5.38590609250381 | -3.55676750319101 | -0.07886100052229 |
| C      | -5.24776588635365 | -5.12552213686798 | -2.38801914030050 |
| H      | -3.11166125324135 | -4.85411029846030 | -2.25780504370698 |
| C      | -6.55150053922858 | -4.05269014354448 | -0.65471485819484 |
| H      | -5.44716162644112 | -2.92128543431557 | 0.80521115348399  |
| C      | -6.48639096233078 | -4.84183026081287 | -1.80653858707629 |
| H      | -5.18937187226298 | -5.75565111071017 | -3.27676044195941 |
| H      | -7.51802206336595 | -3.82153761099280 | -0.20460757233515 |
| H      | -7.40143068018639 | -5.23997523931067 | -2.24796223558843 |
| C      | -1.91031511969424 | -2.76441085307626 | -0.93333019313532 |
| H      | -0.88249645633345 | -2.67990793706403 | -0.56562455048872 |
| H      | -2.00013542924448 | -2.91366637767263 | -2.01102398295171 |
| H      | -2.06487667486690 | 1.19864681731145  | 7.83849276059536  |
| C      | -1.51312279001547 | 1.31684149337586  | 6.89387154685143  |
| C      | -0.22103273651428 | 0.47645486394371  | 6.93621236113762  |
| H      | -1.30255526714046 | 2.38721319417982  | 6.76565954020677  |
| H      | -2.17272831680207 | 1.00009389271757  | 6.07494529216302  |
| C      | 0.58869684440248  | 0.65156903171014  | 5.64672059352618  |
| C      | -0.60143133459279 | -0.98892235725806 | 7.19085788140021  |
| C      | 0.65253546187408  | 0.96435731911097  | 8.11293846393522  |
| C      | -3.06230214610713 | -0.60007569078087 | 4.04816897549322  |
| C      | 1.13308371929371  | -0.42283122482268 | 4.92926228360900  |
| C      | 0.88120119821259  | 1.94026209551468  | 5.17145350406815  |
| H      | 0.28522422077140  | -1.62491348402286 | 7.32352893011634  |
| H      | -1.20099668466636 | -1.05932839964774 | 8.10989772713544  |
| H      | -1.20231049154516 | -1.40044876188077 | 6.36811016473822  |
| H      | 0.10820505993368  | 0.85405232712173  | 9.06342692729306  |
| H      | 1.58300965454165  | 0.38207601442846  | 8.17677968565417  |
| H      | 0.92370597701779  | 2.02278035076078  | 7.99364341016684  |
| C      | -3.98889464085116 | 0.25062422371141  | 3.43075763305230  |
| C      | -3.45031154823233 | -1.85534926820764 | 4.51985616389694  |
| H      | -2.02899184009363 | -0.27616535077522 | 4.17742467463870  |
| C      | 1.95843936948403  | -0.23155982812890 | 3.81831513895882  |
| H      | 0.93124378589661  | -1.44772287264867 | 5.24014723667443  |

|   |                   |                   |                   |
|---|-------------------|-------------------|-------------------|
| C | 1.69884076593772  | 2.14044565336144  | 4.06814156906128  |
| H | 0.46794013679052  | 2.81710340923391  | 5.67243944484474  |
| C | -3.65723067844851 | 1.64351989020751  | 3.05696227941908  |
| C | -5.29816303045732 | -0.22829034812438 | 3.25147424145567  |
| C | -4.75736281520498 | -2.33245363374207 | 4.36499470471170  |
| H | -2.70487084005818 | -2.47238372902770 | 5.01992236009170  |
| C | 2.27657885509739  | 1.06180451364138  | 3.37252559385056  |
| H | 2.35801531999772  | -1.10809983556040 | 3.31236346454041  |
| H | 1.87847296201532  | 3.15935352252755  | 3.72781007239521  |
| C | -2.47258796782029 | 1.99695690541307  | 2.35262176635868  |
| C | -4.51580060396479 | 2.67096347482549  | 3.40154622255728  |
| C | -5.66783912460967 | -1.49054597943704 | 3.70338493632604  |
| H | -6.02191148291827 | 0.39413420110435  | 2.72402403970742  |
| C | -5.21480791547905 | -3.69141314054440 | 4.90592866579196  |
| C | 3.20050574582448  | 1.36431020726188  | 2.25298073540178  |
| O | -1.63041730907288 | 0.95156495710353  | 1.97184244591139  |
| C | -2.10191700374434 | 3.30547261823017  | 2.08154577284132  |
| H | -5.42407334385659 | 2.43547455385760  | 3.95953227943349  |
| C | -4.26563883299503 | 4.01624450772859  | 3.04495578200473  |
| H | -6.69512378158389 | -1.82246941132746 | 3.54097451082895  |
| C | -5.86255954491868 | -4.52481922472287 | 3.78184469196118  |
| C | -6.25699370498308 | -3.44870045472685 | 6.018202711103885 |
| C | -4.05200091494250 | -4.50238573822913 | 5.49481355179073  |
| C | 3.32554477072031  | 0.56348483261578  | 1.08039760180914  |
| C | 3.98165428284694  | 2.50974837807753  | 2.29939447284327  |
| P | -1.22406615463474 | 0.63940078719031  | 0.43975974503965  |
| C | -3.04612894638408 | 4.35081251257435  | 2.36919798203959  |
| C | -0.77825969170938 | 3.64339450132099  | 1.49647959059173  |
| C | -5.20163471236582 | 5.04208890147096  | 3.33900396596212  |
| H | -5.13977420934008 | -4.75327965476474 | 2.98560954590092  |
| H | -6.22958167558733 | -5.47980553099037 | 4.18630084685697  |
| H | -6.71616276656526 | -4.00602863457508 | 3.32452592022087  |
| H | -6.60647891894704 | -4.40805226265782 | 6.42899329715433  |
| H | -5.82225457345570 | -2.85918813911796 | 6.83823666760056  |
| H | -7.13102435058233 | -2.90289998679886 | 5.63617122712553  |
| H | -4.42423541450591 | -5.47297378016419 | 5.85240382914767  |
| H | -3.27261764324498 | -4.70036342671790 | 4.74424536629772  |
| H | -3.58660210392326 | -3.99042928127741 | 6.34952530523490  |
| O | 2.62905176058175  | -0.64482888302236 | 1.04847648007189  |
| C | 4.13209056898652  | 0.88816202511658  | -0.00670077109539 |
| H | 3.95743926039379  | 3.13356843526178  | 3.19371561979892  |
| C | 4.78999442360072  | 2.92557355354104  | 1.22012909736443  |
| O | -1.14557266310098 | 2.08557227692350  | -0.28516818217781 |
| N | 0.07058035782901  | -0.19597096591758 | 0.61170918221612  |
| N | -2.35555271900785 | -0.12584391597271 | -0.45601627885520 |
| C | -2.84526796127578 | 5.69884859327588  | 1.97325369175439  |
| C | 0.10560537523332  | 4.55861805479982  | 2.15892696830562  |
| C | -0.36988425417418 | 3.10825935895864  | 0.28596530165703  |
| H | -6.12078326326858 | 4.77216573594190  | 3.86320650899557  |
| C | -4.96710810296802 | 6.34511221981332  | 2.95716699315107  |
| P | 1.37453306080919  | -0.86418321481571 | 0.04522695546972  |
| C | 4.18959732651010  | 0.00014261777356  | -1.19937891294981 |
| C | 4.85503126098290  | 2.12761660580387  | 0.03120351143403  |
| C | 5.50789750105125  | 4.15065990620497  | 1.27786814545222  |
| S | -3.87740631478545 | 0.39975296793721  | -0.81568981084991 |
| H | -2.19319194079258 | -1.44059753664404 | -0.72831305469049 |
| C | -3.78387560971295 | 6.66934765122745  | 2.25686992386458  |
| H | -1.94662276970233 | 5.96318623952139  | 1.41861429905158  |

|   |                   |                   |                   |
|---|-------------------|-------------------|-------------------|
| C | -0.13429750663722 | 5.04146115202690  | 3.47154997834952  |
| C | 1.31266857686964  | 4.95464965650710  | 1.49453723396344  |
| C | 0.75998148922869  | 3.56708482927285  | -0.45082255129467 |
| H | -5.69829103550602 | 7.12337526890946  | 3.18003580357541  |
| O | 1.79735645240717  | -0.00280774876759 | -1.25738558996611 |
| N | 1.29231464859050  | -2.40736242662765 | -0.31195789133566 |
| C | 3.01633678271689  | -0.39670742330234 | -1.82778236826915 |
| C | 5.43197723315331  | -0.47733533934756 | -1.73483657510529 |
| C | 5.59176565074349  | 2.63350874568517  | -1.07342938764170 |
| H | 5.46061511163679  | 4.73417241210677  | 2.19975021303085  |
| C | 6.22853218799649  | 4.60270444758382  | 0.19459798014419  |
| O | -4.52065033516894 | 0.99957794388371  | 0.34348815969583  |
| O | -4.50274579796576 | -0.70942002233916 | -1.51796957328604 |
| H | -3.61375144088342 | 7.69505040444351  | 1.92674537875607  |
| H | -1.03504756963368 | 4.72519969920182  | 3.99566922533594  |
| C | 0.77049843449508  | 5.87497398323369  | 4.09602829086923  |
| C | 2.21449060275461  | 5.82842074461086  | 2.15802754056228  |
| C | 1.57817871224982  | 4.48536603283527  | 0.18778237048564  |
| C | 1.03383701820692  | 3.16518900841846  | -1.84857351845470 |
| S | 1.89949050708782  | -3.64442224702130 | 0.49982848070862  |
| C | 2.96401281624855  | -1.20015104630893 | -2.99972462085350 |
| C | 5.41310700626896  | -1.23927876798991 | -2.95075802771811 |
| C | 6.67922258479090  | -0.26642301606608 | -1.09268448242430 |
| C | 6.25611458851722  | 3.84017721996791  | -0.99584102650171 |
| H | 5.61899062849972  | 2.06182633081915  | -1.99963155996207 |
| H | 6.76876357448545  | 5.54898799288198  | 0.24774937500179  |
| H | 0.57432196683516  | 6.22096199299716  | 5.11195013484117  |
| C | 1.95373121250896  | 6.27795406071919  | 3.43439260370469  |
| H | 3.12763606399436  | 6.12298624603039  | 1.63703337641636  |
| H | 2.45297710258357  | 4.87308480179384  | -0.33673609622518 |
| C | 0.01130994044316  | 2.98413101564463  | -2.79149032168126 |
| C | 2.35683897987030  | 3.04412659403525  | -2.30203607674654 |
| O | 1.88691112815283  | -3.45694572806486 | 1.95018082527276  |
| O | 1.27660099598518  | -4.85421216746273 | -0.04911565407887 |
| C | 4.17791791679586  | -1.56682734848728 | -3.55571767608459 |
| C | 1.68817571463146  | -1.66068369691598 | -3.59052203394769 |
| C | 6.64026018013683  | -1.68899605512794 | -3.50600632812206 |
| C | 7.85247166376878  | -0.73489415867803 | -1.64755647795820 |
| H | 6.70311304678024  | 0.26020167340925  | -0.14016027426357 |
| H | 6.80603375847975  | 4.20928250864784  | -1.86277010829762 |
| H | 2.65852898691664  | 6.94105835596341  | 3.93819666488098  |
| C | 0.30504520858613  | 2.69449116623182  | -4.12411763125893 |
| H | -1.02848752739256 | 3.08986878514282  | -2.49080390046833 |
| C | 2.64129406600503  | 2.74010908143233  | -3.62745912219955 |
| H | 3.17839574650133  | 3.16585500958663  | -1.59835197481110 |
| H | 4.18683470683755  | -2.14864316153475 | -4.47866831673676 |
| C | 1.58281291506649  | -2.97031102958512 | -4.08389342706730 |
| C | 0.55938268522281  | -0.83356552387484 | -3.70265682672190 |
| H | 6.61120464652131  | -2.26323578603918 | -4.43392354755177 |
| C | 7.83824945067963  | -1.43837787020912 | -2.87285991556529 |
| H | 8.79660224008667  | -0.57370635368235 | -1.12581678468509 |
| F | -2.68089282246848 | 1.04372711707675  | -6.01234964782335 |
| C | 1.62346715759458  | 2.55414760581045  | -4.57718569841987 |
| H | -0.52188101831035 | 2.56919927723040  | -4.82109322069874 |
| H | 3.68709718334458  | 2.63837712898725  | -3.92333186903997 |
| C | 0.40349551820337  | -3.43119390058597 | -4.66469518070893 |
| H | 2.43210883529968  | -3.64905848924908 | -3.98902694986094 |
| C | -0.61125518209328 | -1.29870739284053 | -4.29577248512306 |



|   |                   |                   |                   |
|---|-------------------|-------------------|-------------------|
| H | 0.59795239834327  | 0.19274289145921  | -3.34535127638013 |
| H | 8.77266700759964  | -1.80077520328762 | -3.30368184642834 |
| C | -3.41785342078512 | 2.16140536823649  | -5.75625251729460 |
| C | 1.97383599063501  | 2.23765061731595  | -6.03396502793720 |
| C | -0.72569891778170 | -2.60724394075718 | -4.78997007412053 |
| H | 0.37130965514140  | -4.46124734023799 | -5.01906451032993 |
| H | -1.45121060577166 | -0.61016671295212 | -4.37806133335943 |
| F | -4.66035298035098 | 1.93817462660901  | -6.26525991150856 |
| C | -3.47289521973248 | 2.47158043303420  | -4.28078903281671 |
| F | -2.86856139890983 | 3.17744400124807  | -6.47265143018751 |
| C | 2.70739927833879  | 3.45390206461572  | -6.63678912553079 |
| C | 0.72635731965339  | 1.94480428496152  | -6.87916319528365 |
| C | 2.89505803224626  | 1.00258961010458  | -6.09803729399660 |
| C | -1.99510066716871 | -3.08359428430107 | -5.50524231540255 |
| C | -3.49092136730175 | 3.80095956542178  | -3.85304767872983 |
| C | -3.56482629436558 | 1.42738557925368  | -3.35808339684858 |
| H | 2.97706111844904  | 3.25393902009664  | -7.68492740353545 |
| H | 2.06934373070933  | 4.34912049757826  | -6.60893185361300 |
| H | 3.63071496326172  | 3.67931011363406  | -6.08470678644015 |
| H | 1.02995577195935  | 1.70472913258231  | -7.90828338659005 |
| H | 0.16569487175919  | 1.08445292895120  | -6.48579993844572 |
| H | 0.04759556869154  | 2.80847230631061  | -6.92761146735104 |
| H | 3.81980939679430  | 1.14616878394198  | -5.52277911540771 |
| H | 2.38483749669011  | 0.11436322954623  | -5.70169863500388 |
| H | 3.17643179973162  | 0.80152221477600  | -7.14267544506052 |
| C | -1.86120285670476 | -2.71277081800165 | -6.99885101030735 |
| C | -3.25718896908249 | -2.40488424375901 | -4.94164764718392 |
| C | -2.17383583523922 | -4.60721561958690 | -5.38672460641173 |
| C | -3.61734340131311 | 4.08408291668849  | -2.49257679287260 |
| H | -3.41108672143856 | 4.61104532762582  | -4.57563323198099 |
| C | -3.68313724212323 | 1.73255100151208  | -2.00392286613488 |
| H | -3.57083551476444 | 0.38594333853342  | -3.67927894881659 |
| H | -2.75324292780458 | -3.03781073879053 | -7.55634354437035 |
| H | -1.75461744522116 | -1.62563090281687 | -7.12365659782714 |
| H | -0.97930771369746 | -3.19470117466935 | -7.44483102169556 |
| H | -4.15113527563543 | -2.83110015901799 | -5.41943354664430 |
| H | -3.35886688590145 | -2.54753763301627 | -3.85685678583426 |
| H | -3.26584031423635 | -1.32770860908756 | -5.15291954718582 |
| H | -1.38027425359313 | -5.16040813869962 | -5.90728594810726 |
| H | -2.17995963108209 | -4.93041338662194 | -4.33612871166290 |
| H | -3.13009401121011 | -4.90328082544085 | -5.84176886036477 |
| C | -3.72419524969348 | 3.05207775167064  | -1.55784952014353 |
| C | -3.59466278269286 | 5.51201514702710  | -2.00399640298193 |
| H | -3.84266508573732 | 3.26402818499353  | -0.49539495429464 |
| F | -4.54788911035492 | 5.73711175872655  | -1.06480699019662 |
| F | -3.79210763955483 | 6.40316009266380  | -3.00984695337979 |
| F | -2.39131860185041 | 5.81422325669275  | -1.43343257435882 |
| C | 3.97987315150370  | -4.37565407803772 | -1.16708327090543 |
| C | 3.62932093003734  | -3.74546100331800 | 0.02512069983765  |
| H | 3.20089747655513  | -4.78913692318318 | -1.80733645580150 |
| C | 5.33036773132266  | -4.49137192668925 | -1.50196198850015 |
| C | 4.60203029893063  | -3.23540913866184 | 0.88120984045669  |
| C | 6.32052809419683  | -3.98388863569630 | -0.65860188406423 |
| C | 5.70245608685694  | -5.22771764328846 | -2.76292621885586 |
| C | 5.94845090268669  | -3.35626234970256 | 0.53043332227271  |
| H | 4.30201390773504  | -2.76566278453268 | 1.81688485408539  |
| H | 7.37046992112715  | -4.07179801459675 | -0.92868201629321 |
| F | 4.95933533346613  | -4.81169352290036 | -3.83285112092338 |

|        |                   |                   |                   |
|--------|-------------------|-------------------|-------------------|
| F      | 5.48227263628959  | -6.56712904388417 | -2.64144810162695 |
| F      | 7.00833587200003  | -5.06738517849061 | -3.09809617926782 |
| C      | 6.99070448185101  | -2.85367013896795 | 1.49666418313221  |
| F      | 7.07887289726663  | -3.66174225578029 | 2.59237577302313  |
| F      | 8.23154608779861  | -2.79721119377889 | 0.94604303518195  |
| F      | 6.69370891398089  | -1.60619388474261 | 1.95915186980393  |
| H      | -0.54469200832881 | -5.33868012789256 | 0.29688437913980  |
| H      | -0.36877024924623 | -5.23777386162379 | 2.51752851465072  |
| H      | -0.66352036819361 | -2.97466523812833 | 1.55832858940378  |
| H      | -3.66306020941396 | -3.57944491004520 | 1.87111568522219  |
| 228    |                   |                   |                   |
| TS1-5' |                   |                   |                   |
| H      | -4.39739197088266 | -1.99533435497703 | -5.54013215167051 |
| C      | -3.59684727492250 | -2.08533846693109 | -4.79015470255820 |
| C      | -2.25168857750894 | -2.37666909071916 | -5.48504695035174 |
| H      | -3.87397519507678 | -2.88842973210884 | -4.09415904575250 |
| H      | -3.55301942473629 | -1.14567586668308 | -4.22418500029060 |
| C      | -1.15126855409882 | -2.55595459306040 | -4.43350368715657 |
| C      | -1.95125174970561 | -1.22742250720052 | -6.45714205157274 |
| C      | -2.37491306765041 | -3.68434014101748 | -6.29517457191776 |
| C      | -1.98044989921662 | 1.05101487252772  | -3.25879772921047 |
| C      | -1.27926545412782 | -3.55345585777011 | -3.45316068952415 |
| C      | 0.01761302903689  | -1.78332241564761 | -4.40592252813799 |
| H      | -1.87980312497959 | -0.26283904203975 | -5.93514128944988 |
| H      | -1.01659414382363 | -1.39592383250393 | -7.01196196157198 |
| H      | -2.76474496842610 | -1.14776890667818 | -7.19290104489665 |
| H      | -2.63397425872805 | -4.53435686799629 | -5.64855528999147 |
| H      | -3.16127980012758 | -3.58469588860646 | -7.05891862435728 |
| H      | -1.42850140234342 | -3.92118580317328 | -6.80248907364161 |
| C      | -3.24595501120439 | 1.33137148387061  | -2.70849215578273 |
| C      | -1.39441554137025 | 1.90417862364601  | -4.18576707256842 |
| H      | -1.45232542296075 | 0.13891638089540  | -2.99419972597972 |
| C      | -0.28039077970792 | -3.78521826468734 | -2.51520124684210 |
| H      | -2.17964361047580 | -4.16748498326005 | -3.41204240604661 |
| C      | 1.02223647928800  | -2.00612060916679 | -3.46331864219041 |
| H      | 0.16589890615204  | -0.98945706193145 | -5.13745442560929 |
| C      | -3.97788312137360 | 0.34160304052252  | -1.88189506409544 |
| C      | -3.85742221391880 | 2.53601293624961  | -3.09931881250192 |
| C      | -2.02900250574455 | 3.07405535083674  | -4.62868446169942 |
| H      | -0.41271305628847 | 1.63218577243142  | -4.57443334273571 |
| C      | 0.90209644751753  | -3.02723052973622 | -2.50984604068050 |
| H      | -0.42583809127789 | -4.55621290948188 | -1.75769989035668 |
| H      | 1.91542742358290  | -1.38444651797104 | -3.48790771025057 |
| C      | -3.32126185544684 | -0.64289083039902 | -1.08314815367192 |
| C      | -5.35835610587256 | 0.24403705550843  | -1.97325426134694 |
| C      | -3.26584317687111 | 3.38142141926130  | -4.04084462792062 |
| H      | -4.82104105719812 | 2.81623240139898  | -2.66928877755507 |
| C      | -1.40438183211477 | 3.89938087886582  | -5.75769998761197 |
| C      | 1.98537806942747  | -3.37413703830471 | -1.56322540766052 |
| O      | -1.94103335433114 | -0.52176863283768 | -0.92901708336985 |
| C      | -3.96741651648042 | -1.75465754663555 | -0.55018156573185 |
| H      | -5.90153109942282 | 0.94437266568300  | -2.60863441739271 |
| C      | -6.09628874732465 | -0.75208165189904 | -1.29580936154893 |
| H      | -3.79170815672490 | 4.29484690900903  | -4.31907188813534 |
| C      | -1.49229226068557 | 3.05991696627817  | -7.05217092145384 |
| C      | 0.07765917063291  | 4.20314452170781  | -5.46234574764119 |
| C      | -2.14109472295077 | 5.22615866474237  | -5.98816124241000 |
| C      | 2.74566682202809  | -2.39507268326145 | -0.86618151017583 |

|   |                   |                   |                   |
|---|-------------------|-------------------|-------------------|
| C | 2.30347487165664  | -4.70089075125499 | -1.32140739394218 |
| P | -1.26560871075547 | -0.34956822364916 | 0.53566326345505  |
| C | -5.39972499956283 | -1.77957811719535 | -0.57932892549780 |
| C | -3.18311324087995 | -2.91069170358993 | -0.03802303708341 |
| C | -7.51542491909286 | -0.77716593095218 | -1.33678898621424 |
| H | -1.06160844266862 | 3.61848684182751  | -7.89700919176450 |
| H | -0.94109588895110 | 2.11458243474210  | -6.95073566951360 |
| H | -2.53754781906413 | 2.81777758305579  | -7.29322932046761 |
| H | 0.66644372787055  | 3.29115371542049  | -5.29937244354056 |
| H | 0.52176654357958  | 4.74350802034841  | -6.31141554569741 |
| H | 0.18707340689989  | 4.83000198552074  | -4.56772610705485 |
| H | -2.13839130498525 | 5.85799315470435  | -5.08742186147644 |
| H | -1.64319668456940 | 5.78848958730898  | -6.79085397701234 |
| H | -3.18526681660042 | 5.06781803158155  | -6.29464964298178 |
| O | 2.42953695487433  | -1.05248063297001 | -1.09257953382951 |
| C | 3.78745602392769  | -2.69355934752245 | 0.00313667059831  |
| H | 1.75981585985552  | -5.48148131439761 | -1.85718595100879 |
| C | 3.31106239187666  | -5.08190184590402 | -0.40555783629807 |
| O | -2.04124688139093 | -1.43537956569964 | 1.43698286742401  |
| N | 0.22399719953688  | -0.70765530086210 | 0.29912451745044  |
| N | -1.68026332309239 | 1.07592672365145  | 1.21935134233495  |
| C | -6.15928897186295 | -2.76574572850128 | 0.10040019803699  |
| C | -3.35051625392346 | -4.22605688946046 | -0.59056252550036 |
| C | -2.20068799890533 | -2.72764802349487 | 0.92023376417602  |
| H | -8.03483872883208 | 0.00760302922532  | -1.89000370313899 |
| C | -8.22454958018617 | -1.75568473671582 | -0.67417011271110 |
| P | 1.69605432630513  | -0.20374378074372 | 0.08382270789153  |
| C | 4.53679626386376  | -1.60025800635257 | 0.67656712616718  |
| C | 4.06882359865662  | -4.07268346444649 | 0.27699916758158  |
| C | 3.57030958962662  | -6.45107681414128 | -0.12941038488056 |
| S | -2.39592007811078 | 1.22340329431862  | 2.70381678861500  |
| H | -1.00155464143120 | 2.29851401204699  | 0.93048002416134  |
| C | -7.53816505357286 | -2.75172208321830 | 0.05727775572962  |
| H | -5.63978802251452 | -3.53022687805476 | 0.67657443291262  |
| C | -4.24663693275999 | -4.51875483877974 | -1.65185658274793 |
| C | -2.53091849654141 | -5.29070032038195 | -0.08424813352046 |
| C | -1.35310949559684 | -3.75328477808857 | 1.42217300900263  |
| H | -9.31504864641019 | -1.75816483285454 | -0.70427939165031 |
| O | 2.44907412668607  | -0.72005880923499 | 1.41951522442330  |
| N | 1.99225870352068  | 1.33698448102986  | -0.15964266592460 |
| C | 3.84465578752564  | -0.63931997928027 | 1.39961203270357  |
| C | 5.96234930350220  | -1.48674070623108 | 0.58996035622680  |
| C | 5.02665381587999  | -4.48929565174538 | 1.23894499238824  |
| H | 2.99203769363466  | -7.20698457397871 | -0.66515095242003 |
| C | 4.51555080710861  | -6.82086103153188 | 0.80198749058955  |
| O | -2.37527036170438 | 2.64810698134995  | 3.00548778683428  |
| O | -1.87310961600347 | 0.28686321773060  | 3.68609384667841  |
| H | -8.10256807200468 | -3.50767180873835 | 0.60439382949416  |
| H | -4.85067858130742 | -3.71853952423447 | -2.07465000889486 |
| C | -4.35451196763349 | -5.79562500182628 | -2.16403473813852 |
| C | -2.67865273300086 | -6.59693202248488 | -0.62322177631906 |
| C | -1.56262240041220 | -5.02428555263158 | 0.91192179421320  |
| C | -0.28077824825753 | -3.49355976551976 | 2.40726834853681  |
| S | 2.46486844391036  | 2.06368323114109  | -1.49858306993359 |
| C | 4.46269919447777  | 0.41669944189987  | 2.12571274221655  |
| C | 6.61786602785898  | -0.46196351367096 | 1.35100481638420  |
| C | 6.75008321097026  | -2.31242115387663 | -0.25266075885811 |
| C | 5.24228794702399  | -5.82741966552468 | 1.49711135619379  |

|   |                   |                   |                   |
|---|-------------------|-------------------|-------------------|
| H | 5.59147715586179  | -3.73623453997793 | 1.78589597884667  |
| H | 4.69933224474361  | -7.87573683152194 | 1.01041339230685  |
| H | -5.04609172000409 | -5.98961615165389 | -2.98535079462209 |
| C | -3.57218224994958 | -6.84961675835479 | -1.64070283612761 |
| H | -2.05449072051649 | -7.39714764777988 | -0.21986558281690 |
| H | -0.95552086644616 | -5.85069194531836 | 1.28653464107663  |
| C | -0.45587324621776 | -2.65102669655679 | 3.51347722714025  |
| C | 0.96683734824836  | -4.12284298929228 | 2.25616590601649  |
| O | 1.77315500112247  | 1.59817107299468  | -2.70073179301218 |
| O | 2.45423265907678  | 3.50550678240563  | -1.22027776750318 |
| C | 5.84845529266372  | 0.44600933412334  | 2.11443092693562  |
| C | 3.68121350561204  | 1.47228844465530  | 2.80764280549323  |
| C | 8.03205337466880  | -0.35021316756405 | 1.28491128432313  |
| C | 8.12030311284767  | -2.16126396644291 | -0.31290849671026 |
| H | 6.25772615427750  | -3.06111540244083 | -0.87168161529172 |
| H | 5.97770700091569  | -6.11981522308944 | 2.24816686727152  |
| H | -3.67036448536959 | -7.85613768133390 | -2.04957764272876 |
| C | 0.57273899149680  | -2.45615631440523 | 4.43507012366296  |
| H | -1.39872271427324 | -2.13104843955613 | 3.66615957457020  |
| C | 1.98434274927991  | -3.92769022951961 | 3.18224211872773  |
| H | 1.15188584384205  | -4.74882160731282 | 1.38201371904370  |
| H | 6.36924054229191  | 1.21419782863014  | 2.68789566831024  |
| C | 2.47738673942663  | 1.23000684130437  | 3.48833175340021  |
| C | 4.14397272983137  | 2.79911696139288  | 2.76129199632237  |
| H | 8.52000271810540  | 0.43108203537781  | 1.87074687430763  |
| C | 8.77098461518042  | -1.18224576016271 | 0.47196494407638  |
| H | 8.70371616397317  | -2.79527969690671 | -0.98191210361419 |
| F | -6.62570605933183 | -1.54226413754034 | 4.96857183583471  |
| C | 1.81310415985068  | -3.09223412273833 | 4.29877135373076  |
| H | 0.38479328689429  | -1.79067198085781 | 5.27697922582622  |
| H | 2.93762441671994  | -4.43136579439207 | 3.01692367550728  |
| C | 1.76303564040377  | 2.27415071384312  | 4.07791448847691  |
| H | 2.07998519931172  | 0.21840515894834  | 3.55635574623546  |
| C | 3.43047083613117  | 3.83199245985728  | 3.35643884330270  |
| H | 5.06409235736451  | 3.02753092819238  | 2.22126518198550  |
| H | 9.85530976572832  | -1.07489446444171 | 0.41875913780325  |
| C | -6.62035100256780 | -1.75182136096274 | 3.62093770266066  |
| C | 2.94885022853554  | -2.93004744663476 | 5.31440807161888  |
| C | 2.21594920036227  | 3.59967320099485  | 4.02258047992250  |
| H | 0.82472448388215  | 2.03400808114792  | 4.57822335006127  |
| H | 3.82462324347257  | 4.84664477280476  | 3.28199527962378  |
| F | -7.90228976879999 | -2.00531302779532 | 3.25298901706063  |
| C | -6.02988914707000 | -0.57017700140357 | 2.89248590921714  |
| F | -5.90113182654440 | -2.88902208999738 | 3.40814070758438  |
| C | 4.20864545701085  | -2.38850482140265 | 4.61134684751077  |
| C | 3.26508778444498  | -4.31162888963979 | 5.92475235927738  |
| C | 2.58137837542641  | -1.96523920244439 | 6.45017013581134  |
| C | 1.46376182190369  | 4.76691753703320  | 4.66872005571553  |
| C | -6.83778101656108 | 0.28724434319817  | 2.14725816274496  |
| C | -4.66226914916043 | -0.31772840884090 | 3.03255950281644  |
| H | 5.04381546888998  | -2.32874693534800 | 5.32564034620070  |
| H | 4.51873911038749  | -3.03457312125663 | 3.77933409391346  |
| H | 4.03471761708784  | -1.38202009722664 | 4.20879826629645  |
| H | 2.38198961319949  | -4.72768729651053 | 6.43094685076306  |
| H | 3.58161538165471  | -5.02751178081337 | 5.15325726537825  |
| H | 4.07756930928950  | -4.22400139288736 | 6.66216356693917  |
| H | 1.71067799502816  | -2.31873906652072 | 7.02137521515380  |
| H | 3.42705967674462  | -1.88114562418715 | 7.14796683202986  |

|   |                   |                   |                   |
|---|-------------------|-------------------|-------------------|
| H | 2.36172735508300  | -0.95633814461050 | 6.07112668686856  |
| C | 1.31964887654904  | 5.92307193756741  | 3.65700172605401  |
| C | 2.27880279992629  | 5.26413405074194  | 5.88163555200159  |
| C | 0.06645653512647  | 4.35717597267736  | 5.15681304455737  |
| C | -6.26862079397453 | 1.40819054597134  | 1.53642760743538  |
| H | -7.90006594588430 | 0.08117421435734  | 2.03557822797033  |
| C | -4.11826154485749 | 0.80614913439110  | 2.42067201891151  |
| H | -4.02197938856679 | -0.97263473870904 | 3.62251117694694  |
| H | 0.84629567978548  | 5.59060811132501  | 2.72253982771776  |
| H | 0.70902781417989  | 6.72954783011915  | 4.09031354000472  |
| H | 2.29218980425984  | 6.35636310045423  | 3.38758772376085  |
| H | 1.77288411590263  | 6.11865311672619  | 6.35686592436957  |
| H | 2.38816399134236  | 4.46727569086005  | 6.63136109396170  |
| H | 3.28534175028304  | 5.58693317175023  | 5.58024356294848  |
| H | -0.44718918883469 | 5.23527837427802  | 5.57528702014443  |
| H | -0.56180277848793 | 3.94985084382229  | 4.35188782077180  |
| H | 0.11970375915003  | 3.59945151386272  | 5.95174628066021  |
| C | -4.90672137789216 | 1.67823216530551  | 1.66965505195497  |
| C | -7.13564515405375 | 2.39007809005303  | 0.78981281487387  |
| H | -4.46557392042784 | 2.56716944755988  | 1.21781458466479  |
| F | -8.35081373053039 | 1.87773738406332  | 0.47034809454290  |
| F | -6.55428042631675 | 2.80543253506376  | -0.37393870194248 |
| F | -7.36119950036301 | 3.51496471156566  | 1.52960654904798  |
| C | 5.17228737495081  | 2.37811207678207  | -1.03665390862722 |
| C | 4.20060550958936  | 1.64189154904802  | -1.71190558110478 |
| H | 4.87108065730874  | 3.20287726503098  | -0.39110951118411 |
| C | 6.51885037805015  | 2.05718062508625  | -1.22208871755626 |
| C | 4.55609436837956  | 0.60218537182338  | -2.56684842016909 |
| C | 6.89291630698624  | 1.00352649436709  | -2.05811820370675 |
| C | 7.56618701038813  | 2.90995477838202  | -0.55289715288004 |
| C | 5.90511747533580  | 0.27999878921456  | -2.72628169703137 |
| H | 3.78095654063121  | 0.05861350059552  | -3.10365452265110 |
| H | 7.94244734135974  | 0.74617172228847  | -2.18253370570284 |
| F | 7.63768936206467  | 4.14547665199628  | -1.12541462097553 |
| F | 8.80785836866117  | 2.36658361984757  | -0.62258266923637 |
| F | 7.29048397432661  | 3.11532379193643  | 0.76968036438433  |
| C | 6.26713380305914  | -0.83798364811636 | -3.67007130919624 |
| F | 6.01784531447284  | -0.49262160256987 | -4.96679939101501 |
| F | 7.57793577514888  | -1.18309358384739 | -3.59535121338541 |
| F | 5.53553783417516  | -1.96228149400085 | -3.42302431799625 |
| O | 1.11445993715146  | 5.99275361842534  | -0.52809722290730 |
| C | -2.33014432104772 | 4.87381023028730  | 0.68385275424339  |
| C | -3.54757013719036 | 4.94114229464923  | -0.02544506126720 |
| C | -3.37416088995615 | 6.09323341050321  | 2.51104887421418  |
| C | -4.66603058355865 | 5.54439681210326  | 0.54144309602665  |
| H | -3.62801556642583 | 4.47968398952199  | -1.00987774106933 |
| C | -4.58257552347379 | 6.12303391657299  | 1.81130573427162  |
| H | -3.30031786392795 | 6.55023930992979  | 3.49857276744466  |
| H | -5.61080563783313 | 5.55338669646825  | -0.00289696398321 |
| H | -5.46033196306139 | 6.59715962862780  | 2.25294100009508  |
| H | 1.63667359409056  | 5.16658513550770  | -0.48070413221915 |
| H | 1.24272110566198  | 5.45628930230860  | -2.53532575291976 |
| C | -0.83871124183052 | 5.57734798953766  | -1.94992007558837 |
| H | -1.49812598498412 | 6.28347583401397  | -1.42359157307748 |
| H | -1.15689484201470 | 5.56909000115941  | -3.00365570278390 |
| C | 0.60872823254290  | 6.05823853950335  | -1.86337015051047 |
| C | -2.26262158814227 | 5.46662978340951  | 1.95801397711734  |
| H | 0.66559543045364  | 7.10873095127153  | -2.19414064220160 |

|   |                   |                  |                   |
|---|-------------------|------------------|-------------------|
| H | -0.36365595831629 | 3.58820918594383 | 2.01340771632492  |
| C | -0.32307055747841 | 3.43081488437082 | 0.93391319425615  |
| C | -1.01545407840515 | 4.15806461295085 | -1.36351365231262 |
| C | -1.17109936665617 | 4.17322652723253 | 0.11910705144980  |
| H | -1.92189684771949 | 3.71310825863138 | -1.80457202372522 |
| H | -0.17417363202902 | 3.51724829539063 | -1.65468387802717 |
| H | 0.63487771408064  | 3.09828741948971 | 0.52913691869699  |
| H | -1.32241108900365 | 5.45039452964582 | 2.50595823517038  |

178

3b\_1 (cat)

|   |                   |                   |                   |
|---|-------------------|-------------------|-------------------|
| H | 0.83585999887289  | -5.83991000981387 | 1.29774000863283  |
| H | 0.90537999998729  | -1.88468990503682 | 3.36430991440632  |
| H | 3.14038002057474  | -1.20769964863136 | 4.03126968370083  |
| C | 4.18346009363254  | -2.51115981799999 | 2.65123988277742  |
| C | 3.04295995654414  | -1.95603055016030 | 3.24535043827380  |
| C | 1.75719000286760  | -2.34314024673242 | 2.86734024475711  |
| C | 1.55677999737958  | -3.30942970494473 | 1.87144972999658  |
| C | 2.69792999427391  | -3.84503988375081 | 1.24852988451434  |
| C | 3.97580993187412  | -3.45696007016577 | 1.63289005666054  |
| H | 4.82808001611494  | -3.90210000522482 | 1.11756999813187  |
| H | 2.57997999715397  | -4.56029004578806 | 0.43310003073423  |
| C | 0.21411000621077  | -3.80058002937446 | 1.49078002131569  |
| C | 0.00385999847049  | -5.13986001793003 | 1.19958002004066  |
| C | -1.25098000416396 | -5.63645000483450 | 0.77498001416288  |
| C | -1.41871999958010 | -7.00242999861802 | 0.42254999899408  |
| C | -2.62642999993837 | -7.47151000132816 | -0.04642000251922 |
| C | -3.72117000108780 | -6.58703999800736 | -0.18108000164733 |
| C | -3.59717000207372 | -5.25799999882003 | 0.16882999937432  |
| C | -2.37046000058147 | -4.74485000349775 | 0.66550000424132  |
| C | -2.18319999926754 | -3.36682999869127 | 1.00669999021681  |
| C | -0.91758000050020 | -2.94597001763358 | 1.37971002432886  |
| O | -0.75089999639420 | -1.58188000362111 | 1.64662998994289  |
| P | -0.68401999775923 | -0.59113000079708 | 0.36668000140546  |
| N | -0.93474000225810 | 0.90381000143569  | 0.82917000066079  |
| S | -0.65496000059767 | 1.46620000134449  | 2.31421999788164  |
| O | -0.73286999908143 | 2.92170999861241  | 2.24804000107838  |
| O | 0.51071999934689  | 0.85799999845789  | 2.95701000239593  |
| C | -2.09426999953968 | 0.90075999857034  | 3.24050000150514  |
| C | -1.97207000141611 | -0.19689000095123 | 4.08716000219277  |
| C | -3.10503000095561 | -0.68644000155258 | 4.74160999783331  |
| C | -4.34557999817218 | -0.07403000235519 | 4.56952999956007  |
| C | -4.44295000163526 | 1.04567999799362  | 3.73976000182966  |
| C | -3.32273000149217 | 1.53683999901344  | 3.06691000139610  |
| H | -3.39683999954409 | 2.40640000069706  | 2.41580999924466  |
| C | -5.75377000124562 | 1.77555000155223  | 3.59659000216789  |
| F | -6.02273000074725 | 2.09389999904574  | 2.29624000121277  |
| F | -6.80789000006500 | 1.05245000020962  | 4.05673000040002  |
| F | -5.74567999834469 | 2.95142000204756  | 4.28670000092484  |
| H | -5.22807000039223 | -0.46736000212831 | 5.06947999928348  |
| C | -2.94619000069493 | -1.87879999990455 | 5.64912999732968  |
| F | -2.32245000019682 | -2.91385000264859 | 5.01484999856214  |
| F | -4.13309000165747 | -2.34638000200486 | 6.11355000206294  |
| F | -2.18072999890537 | -1.57694000023040 | 6.73761000146427  |
| H | -0.99795999955130 | -0.66432000190750 | 4.22043999775025  |
| N | 0.59804000172123  | -0.97145999972885 | -0.49359999997546 |
| P | 1.81167999869161  | -0.24308000047971 | -1.10150000192416 |
| N | 1.75215999842521  | 1.41528999997400  | -1.30400000077469 |
| S | 0.95366999881537  | 2.16173999854198  | -2.59887999744994 |

|   |                   |                   |                   |
|---|-------------------|-------------------|-------------------|
| O | -0.13264999916376 | 1.26476999874312  | -2.93608000143433 |
| O | 1.94282999747805  | 2.5689199998975   | -3.57843000031111 |
| C | 0.33269000130026  | 3.65563999777739  | -1.83731999981507 |
| C | -0.82239000249285 | 3.63976999974981  | -1.04691000164300 |
| C | -1.28556000066941 | 4.85707999970679  | -0.54988999798462 |
| C | -0.61206999746616 | 6.05265999908062  | -0.82377999754938 |
| C | 0.53838999822239  | 6.03750999958714  | -1.60442999948026 |
| C | 1.01762000071690  | 4.83292000155444  | -2.12357000206955 |
| H | 1.90292999856881  | 4.80440000132227  | -2.75767000146980 |
| C | 1.30149999822849  | 7.30409999747885  | -1.89817000233111 |
| F | 0.69568999783384  | 8.40451000010555  | -1.39012999969523 |
| F | 2.56096000002897  | 7.25491000197246  | -1.36740000237399 |
| F | 1.45234999968661  | 7.49898999946384  | -3.23601999794413 |
| H | -0.98633000122086 | 6.99271999936673  | -0.42033999832491 |
| C | -2.54070000082213 | 4.95645999802048  | 0.28420999761032  |
| F | -2.30560999918331 | 5.58442999787920  | 1.46547000131194  |
| F | -3.09591999866821 | 3.75817999893666  | 0.55029999923239  |
| F | -3.48715000110710 | 5.70547000248169  | -0.36816999962343 |
| H | -1.33501000208798 | 2.70473000200724  | -0.81917999767481 |
| H | 2.56958000033863  | 1.93409000081011  | -0.94894000138969 |
| O | 2.20455000092044  | -0.86058000189617 | -2.53797999831762 |
| C | 2.71401000804876  | -2.18009000142933 | -2.46266004185341 |
| C | 4.04334000158507  | -2.32257000143535 | -2.08784000404728 |
| C | 4.57380999996014  | -3.64340000189392 | -1.93364999863965 |
| C | 5.88490000078165  | -3.89940999797134 | -1.45339999454054 |
| C | 6.34145999977606  | -5.19102999844482 | -1.29079000029687 |
| C | 5.51136000230542  | -6.29221999769284 | -1.60361000207972 |
| C | 4.22883999769391  | -6.07785999984275 | -2.05821000182573 |
| C | 3.72150000116365  | -4.76054000022431 | -2.22047000019842 |
| C | 2.38507999593190  | -4.53627000031076 | -2.62186997922866 |
| C | 1.83752998255681  | -3.26588999281570 | -2.73055995124409 |
| C | 0.40791001208731  | -3.10508002440095 | -3.07293005924321 |
| C | -0.06047012744577 | -2.14470964196150 | -3.97946961490966 |
| C | -1.40744971577765 | -2.10687043395825 | -4.34481038964537 |
| C | -2.34065016115907 | -3.01112999281197 | -3.81932002796306 |
| C | -1.86976992916399 | -3.93845964583022 | -2.87473963684160 |
| C | -0.53112994509182 | -3.98603034872615 | -2.50875036519765 |
| H | -0.20879000526465 | -4.70337994974800 | -1.75257994446999 |
| H | -2.55932002713453 | -4.64240006125913 | -2.40653005185115 |
| H | -4.67200000094689 | -6.95709000037051 | -0.56761000040493 |
| H | -3.86202999940497 | -4.15828000095510 | 2.86885000031901  |
| H | -7.84941999989145 | -2.71999000151314 | 3.63982999798595  |
| H | -7.58139999906255 | -0.98772999768818 | 1.88250999781247  |
| H | -0.56222999814523 | -7.67307999770123 | 0.52027000280579  |
| H | -2.73901000039503 | -8.52142999987500 | -0.32035999944649 |
| H | -5.96823999914387 | -4.28470999820337 | 4.14412000212743  |
| H | 5.17883807822709  | -2.21117731845927 | 2.94736775073769  |
| H | -4.44671000168075 | -4.58554999793370 | 0.05819999840802  |
| H | -6.23703000059179 | 0.07337999806788  | 0.14973999937356  |
| H | -5.76228999775977 | 4.84271999827249  | -3.89926999882690 |
| H | -2.57613000245310 | 1.44568999758833  | -4.25899000152788 |
| H | -2.67631005852049 | -0.32322992152489 | -2.60375992138203 |
| H | -1.72382004542424 | -1.35446993811079 | -5.06681996297808 |
| H | 0.62996001833035  | -1.42761004965184 | -4.42205005792747 |
| H | 1.75479999919296  | -5.39903000113506 | -2.84527999351165 |
| H | 3.57260999846410  | -6.91953999857597 | -2.28938000251376 |
| H | 5.88614000233804  | -7.30862000164184 | -1.47566000219055 |
| H | 7.35029999849976  | -5.36348999892716 | -0.91294000082438 |

|   |                   |                   |                   |
|---|-------------------|-------------------|-------------------|
| H | 6.53259000172360  | -3.06034999794870 | -1.20374999601896 |
| C | 4.84322000163842  | -1.10947999900451 | -1.78278999775828 |
| C | 4.36894000305807  | -0.19738999891793 | -0.85309000149841 |
| C | 5.02716000023744  | 1.01551999671414  | -0.51570000131872 |
| C | 6.24496000184022  | 1.25895000242013  | -1.12899000162514 |
| C | 6.78779999893832  | 0.38108000302951  | -2.09557999971440 |
| C | 8.01576000241321  | 0.67436999858528  | -2.74621999844299 |
| C | 8.49931999766975  | -0.14132999770693 | -3.74512000060336 |
| C | 7.76275000213623  | -1.28032999954203 | -4.14386000128606 |
| C | 6.57636000102056  | -1.60423000227337 | -3.51933999875449 |
| C | 6.06735000057200  | -0.80503000005876 | -2.46268000248183 |
| H | 6.01408000133345  | -2.48043999916973 | -3.83953999983228 |
| H | 8.13314000067957  | -1.90620000193269 | -4.95699000063925 |
| H | 9.43318580944408  | 0.09568413988305  | -4.23744193187144 |
| H | 8.56146000184878  | 1.57172000037285  | -2.44752000139372 |
| H | 6.79534000178492  | 2.16644000299293  | -0.87298000071015 |
| C | 4.39842999887643  | 2.01494998468125  | 0.37810000467888  |
| C | 3.78358998989949  | 1.66779996335562  | 1.59158003263320  |
| C | 3.18859000004897  | 2.63856999923313  | 2.39446000153651  |
| C | 3.16945000313552  | 3.99032000063984  | 2.02518999800660  |
| C | 3.76858999963976  | 4.33097999995200  | 0.80008999776253  |
| C | 4.37343000136138  | 3.37069999853280  | -0.00671999946450 |
| H | 4.81604000075315  | 3.66402000232685  | -0.96133999985982 |
| H | 3.75809000163112  | 5.36763000266770  | 0.45896999782067  |
| C | 2.52661000150522  | 5.07371999980042  | 2.89489000050841  |
| C | 1.92416000119686  | 4.49951000172117  | 4.18461999747363  |
| H | 1.12889000242371  | 3.77332000240045  | 3.96824999952119  |
| H | 1.48180999868171  | 5.31670999813709  | 4.77237000027844  |
| H | 2.68826999785651  | 4.01531999998714  | 4.81062999909910  |
| C | 3.60036999955967  | 6.11633999911462  | 3.26808999945078  |
| H | 4.03366999735001  | 6.59202000061402  | 2.37694999801112  |
| H | 4.41849000249882  | 5.65146999778584  | 3.83745999994386  |
| H | 3.15472000050519  | 6.90726000233492  | 3.88971000000911  |
| C | 1.39861000089390  | 5.75801999825824  | 2.09723000002381  |
| H | 1.78180000242613  | 6.22557000160566  | 1.17979000246695  |
| H | 0.93234999923035  | 6.54613999767550  | 2.70753000039429  |
| H | 0.62354999963765  | 5.02841000049866  | 1.82893000096419  |
| H | 2.70195000157184  | 2.31523000409552  | 3.31196000112617  |
| H | 3.75503998881884  | 0.62660999723969  | 1.91117002853448  |
| O | 3.13487000263839  | -0.46195999665461 | -0.21738000173632 |
| O | -1.88954000032930 | -1.10326999884195 | -0.58293999909809 |
| C | -3.13794999891617 | -1.28838999787820 | 0.02787000093935  |
| C | -3.28483999674846 | -2.37625000183495 | 0.87928999598116  |
| C | -4.50320000163619 | -2.50726999729083 | 1.61734000275400  |
| C | -4.68084000178240 | -3.47850999789736 | 2.63580999885453  |
| C | -5.85993999936419 | -3.54590000099992 | 3.34896999940735  |
| C | -6.92161999839666 | -2.65479999989381 | 3.06965000155089  |
| C | -6.77716000233817 | -1.69605000051117 | 2.09030999714381  |
| C | -5.56817000155283 | -1.58425999730587 | 1.35374999766692  |
| C | -5.39177000166417 | -0.57661999823582 | 0.37926999938509  |
| C | -4.18919999993614 | -0.37805999864472 | -0.28381999960054 |
| C | -4.05546999782197 | 0.70639999959422  | -1.28257000136050 |
| C | -3.26420000195416 | 0.57658999923792  | -2.43855999936525 |
| C | -3.21494999774351 | 1.59119000157911  | -3.38689999841246 |
| C | -3.93565000053565 | 2.78637000118280  | -3.23810999919438 |
| C | -4.72109999953055 | 2.91275000183555  | -2.08504000089845 |
| C | -4.77976999838882 | 1.89882999747165  | -1.13001000074535 |
| H | -5.37322999760371 | 2.05755999783639  | -0.22900999897346 |



|   |                   |                   |                   |
|---|-------------------|-------------------|-------------------|
| H | -5.28610999799197 | 3.82625000004837  | -1.90383999851573 |
| C | -3.83478999941811 | 3.87792000039227  | -4.30792000167097 |
| C | -2.36741999790031 | 4.33714999908042  | -4.43634000160866 |
| H | -2.02133000196683 | 4.79850999953391  | -3.50070999773511 |
| H | -2.27214000109702 | 5.08282000104918  | -5.24002999813074 |
| H | -1.69662999968439 | 3.49859999886980  | -4.66889000031592 |
| C | -4.30711000070216 | 3.30215999979280  | -5.65895000235310 |
| H | -5.35117999824411 | 2.96319999997955  | -5.59471000068195 |
| H | -3.69272000039391 | 2.44639999787027  | -5.97093999890247 |
| H | -4.24092999834347 | 4.07101000081785  | -6.44361999943940 |
| C | -4.69626999949720 | 5.10302000215619  | -3.97288999989800 |
| H | -4.59044999922835 | 5.85510999789026  | -4.76807999755179 |
| H | -4.38848999923209 | 5.57072000065674  | -3.02653999822580 |
| H | -3.38236499952091 | -2.97548246671822 | -4.10454042273669 |

178

3b\_1 (TS1-1)

|   |                    |                   |                   |
|---|--------------------|-------------------|-------------------|
| C | -4.003909999712461 | -1.39392999994943 | -2.33904000198956 |
| F | 6.86378999959662   | -2.58448000074430 | -0.43339000046048 |
| F | 7.53939999784456   | -3.39770000253121 | 1.47914999948030  |
| F | 8.49614999857050   | -1.61057000025432 | 0.65727000209471  |
| H | 4.60941000057161   | -2.57628999920015 | 0.87884999855348  |
| C | 1.35076989636650   | 3.17412001502987  | -4.20258992577151 |
| C | -6.25479999872846  | -2.04693000251425 | -1.79688999856430 |
| C | 7.30005999938426   | -2.23405000028294 | 0.81056000259785  |
| C | 2.40810000216670   | -0.73061000323221 | -3.40031999870106 |
| C | 1.36989994988677   | 4.09216031583102  | -3.13895032152058 |
| C | 0.21836027401115   | 2.35718966734238  | -4.31676984433466 |
| H | -2.72422617167005  | 2.30418997135886  | 5.03480681673432  |
| C | -4.88080999911161  | -2.27413999988235 | -1.70684999913735 |
| H | -4.48932000132836  | -3.13581000107450 | -1.16656000065983 |
| H | -2.44460000159546  | -3.94403999935323 | 6.75532000158842  |
| C | 4.94378999808254   | -1.73008000008594 | 1.48003000002737  |
| H | -0.89059000126896  | -3.12092000217433 | 6.49546999941751  |
| C | 3.62342000180992   | -0.95937000098658 | -2.72525000187360 |
| C | 1.85374999919982   | -1.70216999868728 | -4.22477000003485 |
| H | 1.88124999903093   | 0.21391000401955  | -3.28267000091559 |
| C | 0.30547015857369   | 4.20062967035391  | -2.25167972392979 |
| H | 2.23696999001205   | 4.73666994016985  | -2.98757993931835 |
| C | -0.85430020784029  | 2.46098033411595  | -3.43092024414573 |
| H | 0.15186995212857   | 1.61887006463738  | -5.11532000745702 |
| C | 4.26687000017849   | 0.06792000041178  | -1.87476000174828 |
| C | 4.25038000267338   | -2.19872999857173 | -2.92940999826555 |
| C | 2.48169000014875   | -2.94065000200516 | -4.44014000239441 |
| H | 0.89257999809159   | -1.48705000114346 | -4.69424999796702 |
| C | -0.83918001975987  | 3.39588000758632  | -2.38575998992795 |
| H | 0.37298997145025   | 4.90489005207335  | -1.42137003157614 |
| H | -1.70782997112242  | 1.80030995079992  | -3.56558996322507 |
| C | 3.51922999878385   | 0.99816000135814  | -1.09713999969048 |
| C | 5.64694999881907   | 0.19579000026458  | -1.83470000120277 |
| C | 3.69719999873412   | -3.15938999961527 | -3.77734999911723 |
| H | 5.17652999768815   | -2.42872999798593 | -2.40067000114522 |
| C | 1.82098000257948   | -3.98248999921152 | -5.34584000250531 |
| C | -1.97638999995114  | 3.58383999938157  | -1.45721000856015 |
| O | 2.12787000074982   | 0.87161999878646  | -1.11042999931859 |
| C | 4.08384999929216   | 2.05128999920021  | -0.38810999946995 |
| H | 6.26096000239947   | -0.46878999765170 | -2.44406999895552 |
| C | 6.29437999853445   | 1.15960999884738  | -1.02880000185913 |
| H | 4.22566000257908   | -4.10435000116680 | -3.90119999790778 |

|   |                   |                   |                   |
|---|-------------------|-------------------|-------------------|
| C | 1.605769999784498 | -3.37025999994450 | -6.74553000098703 |
| C | 0.45649999998308  | -4.37949999813373 | -4.74473000027322 |
| C | 2.67553999981585  | -5.24831000215196 | -5.49851999901475 |
| C | -2.72058999231299 | 2.49514999609392  | -0.92380999634709 |
| C | -2.35520000556400 | 4.85129999614595  | -1.04404000889920 |
| P | 1.34918000264516  | 0.46057999853457  | 0.24367999787794  |
| C | 5.51179000144397  | 2.10443000100614  | -0.28544999732556 |
| C | 3.21599999955308  | 3.10087000156393  | 0.21078999656616  |
| C | 7.71064999761667  | 1.21148999786889  | -0.93754000020644 |
| H | 2.56352000062860  | -3.06864999956700 | -7.19437000205032 |
| H | 1.12970999960372  | -4.10731999768190 | -7.40930999926349 |
| H | 0.95584000115845  | -2.48579999805617 | -6.70457999840944 |
| H | -0.19848999985216 | -3.50932999811449 | -4.60317000114077 |
| H | -0.05727000226534 | -5.08817999996420 | -5.41145999750695 |
| H | 0.58106999751650  | -4.87039000244902 | -3.76896000013051 |
| H | 2.82697000066966  | -5.75976000153471 | -4.53625000263648 |
| H | 2.16454000212480  | -5.95599999810143 | -6.16658999986866 |
| H | 3.66126999874894  | -5.02729999838281 | -5.93423999842221 |
| O | -2.37449999113792 | 1.20710000174086  | -1.33766999135183 |
| C | -3.77314998868926 | 2.62553999717897  | -0.02941998698597 |
| H | -1.83197000572611 | 5.71948000159161  | -1.44957000273403 |
| C | -3.39688000466744 | 5.06336000158574  | -0.11094000734807 |
| O | 2.02469000135392  | 1.39223000227454  | 1.37153999816335  |
| N | -0.12938999821016 | 0.81610000098281  | -0.05477000087328 |
| N | 1.76150999895605  | -1.05275000134883 | 0.70704000228241  |
| C | 6.18380000165838  | 3.02938000232325  | 0.55404999759595  |
| C | 3.35936000100440  | 4.48337999752828  | -0.14625000324982 |
| C | 2.18572000430301  | 2.75397000042466  | 1.06982000355942  |
| H | 8.29611000164748  | 0.49057000024470  | -1.51126000148270 |
| C | 8.33376000220198  | 2.13120000178259  | -0.12208999803052 |
| P | -1.57373000072488 | 0.24779000062782  | -0.30653000077343 |
| C | -4.45637999969899 | 1.41406999798016  | 0.49965000058387  |
| C | -4.11789000614048 | 3.94234999894627  | 0.42238999364914  |
| C | -3.72143000189206 | 6.37258000200277  | 0.33542000032294  |
| S | 2.29906999856100  | -1.48318000143139 | 2.19977000121990  |
| H | 1.47055000192077  | -2.11963000251891 | -0.08184999783283 |
| C | 7.56086000162451  | 3.03926000012661  | 0.63711999763743  |
| H | 5.59701000060516  | 3.72516999876363  | 1.15221000065628  |
| C | 4.30342000301166  | 4.94440999824400  | -1.10059999616638 |
| C | 2.46772999820993  | 5.44096999804967  | 0.44422999945839  |
| C | 1.28289999434922  | 3.67492999403461  | 1.66780999443894  |
| H | 9.42217999760885  | 2.15272999985518  | -0.05157000173400 |
| O | -2.31995999929639 | 0.52586999965275  | 1.10271000206744  |
| N | -1.78639000168020 | -1.25866000233618 | -0.78175000257958 |
| C | -3.71251000170061 | 0.41013000102510  | 1.10770000058099  |
| C | -5.87562999882803 | 1.24212000245690  | 0.41041999852051  |
| C | -5.10351999771148 | 4.18926999905984  | 1.41392000547447  |
| H | -3.17110999978320 | 7.21579000005460  | -0.08760000033843 |
| C | -4.69394999955364 | 6.57773999970740  | 1.28930000023347  |
| O | 2.29107999952939  | -2.93934999907732 | 2.20418000008176  |
| O | 1.62492000023292  | -0.76016000109172 | 3.26643000233285  |
| H | 8.05581999778758  | 3.74571000154201  | 1.30456000249945  |
| H | 4.96773999603796  | 4.22799000151997  | -1.58013000347469 |
| C | 4.38191999885226  | 6.28016000149114  | -1.43760000059735 |
| C | 2.58685000001785  | 6.81094999896614  | 0.087379999978799 |
| C | 1.46586000060305  | 5.01005000181196  | 1.34493000436746  |
| C | 0.19159000568349  | 3.25291000444315  | 2.57281999876119  |
| S | -2.23490999759085 | -1.70811999804089 | -2.25539999862329 |

|   |                   |                   |                   |
|---|-------------------|-------------------|-------------------|
| C | -4.27802999834574 | -0.71730000233794 | 1.76717999967304  |
| C | -6.47621000219732 | 0.11398999833484  | 1.06203999746236  |
| C | -6.70833999853980 | 2.11695000010530  | -0.33343999930642 |
| C | -5.38305000734324 | 5.47229000286775  | 1.83790999609685  |
| H | -5.63992999947130 | 3.34840999789302  | 1.84993999619542  |
| H | -4.92811000067317 | 7.58796000253766  | 1.62782999912407  |
| H | 5.11046000063865  | 6.60638999785744  | -2.18134999903595 |
| C | 3.52309000186377  | 7.22638000015863  | -0.83378000296040 |
| H | 1.90729000123189  | 7.52868000007661  | 0.55178000215389  |
| H | 0.81229000169711  | 5.75778000072355  | 1.79834000463871  |
| C | 0.36791003239549  | 2.27817006043376  | 3.56456995323674  |
| C | -1.06989993046259 | 3.86479997829534  | 2.47787996802007  |
| O | -1.61409999846565 | -0.93409999905122 | -3.32872999807188 |
| O | -2.11086999770142 | -3.16802999786265 | -2.31304999785548 |
| C | -5.66110999776973 | -0.81380000132563 | 1.74995000102679  |
| C | -3.46065999855012 | -1.72403999751190 | 2.48250999852842  |
| C | -7.88411000009263 | -0.05689000020091 | 0.98959999890080  |
| C | -8.07057999899825 | 1.90945000197490  | -0.40339000238611 |
| H | -6.25611999943686 | 2.95037999945357  | -0.86923000121970 |
| H | -6.14034000058130 | 5.63291999779432  | 2.60680999809504  |
| H | 3.59820999918045  | 8.28041000191640  | -1.10446999792440 |
| C | -0.66860012950197 | 1.94558989326738  | 4.43639014874319  |
| H | 1.32184999856500  | 1.76582998924420  | 3.66763000409940  |
| C | -2.09658019844252 | 3.53100996837360  | 3.35337009127569  |
| H | -1.25708000660866 | 4.59324001448746  | 1.68762000340856  |
| H | -6.14426999852152 | -1.63621000114636 | 2.27916000262825  |
| C | -2.30037999967051 | -1.38535000439574 | 3.20474999964400  |
| C | -3.87697000017203 | -3.06367999879841 | 2.52458999988328  |
| H | -8.33051000219746 | -0.91681000151843 | 1.49252000050220  |
| C | -8.66787999907548 | 0.82162999824780  | 0.27332000170533  |
| H | -8.68886999824097 | 2.58382000039283  | -0.99729000198144 |
| F | 5.43917000221947  | 2.65594000099650  | 3.78957000245924  |
| C | -1.92147985755987 | 2.56777005389274  | 4.36130989611620  |
| H | -0.47790997798141 | 1.18352002835176  | 5.19130994937694  |
| H | -3.05878993217139 | 4.03080000164323  | 3.23540998785807  |
| C | -1.62776999986778 | -2.33689000182161 | 3.96356000237825  |
| H | -1.92425999180101 | -0.36430998573178 | 3.19273000765543  |
| C | -3.20461999829815 | -4.00820000006264 | 3.30097999808835  |
| H | -4.74490999995829 | -3.37567000084992 | 1.94064999903835  |
| H | -9.74660000165384 | 0.67027000224627  | 0.21374999937641  |
| C | 6.20747999902628  | 1.54511999788369  | 3.96761999818773  |
| F | -7.22610000194319 | -4.20689000236727 | -1.90949999855198 |
| C | -2.07555000176527 | -3.66527000143434 | 4.05711999894628  |
| H | -0.73252999741437 | -2.02173999801495 | 4.50258000217266  |
| H | -3.58359000195627 | -5.03002000102687 | 3.31526999996163  |
| F | 6.08145000152593  | 1.19190000051903  | 5.27919000056033  |
| C | 5.77966999746036  | 0.41818999906164  | 3.06059000099537  |
| F | 7.50076000198039  | 1.90810000204606  | 3.77548999927646  |
| H | -7.82208999744108 | -0.76305000189621 | -2.54852999786258 |
| F | -6.81770999975633 | -3.40299000186469 | 0.08056000139555  |
| F | -5.70509000035027 | 2.25569999982661  | -3.56657000137041 |
| C | -1.36057999827788 | -4.65086999767532 | 4.98782999860183  |
| C | 6.71803000022762  | -0.30823000197039 | 2.32911999842452  |
| C | 4.42436000086828  | 0.08126999858118  | 3.01262999852727  |
| C | -5.85689999776732 | -0.07366000136325 | -3.11862999840802 |
| C | -4.47965999790699 | -0.29798999932117 | -3.05210999969766 |
| C | -7.19638999848212 | -3.05216000165754 | -1.18458999949119 |
| C | -6.75082000027007 | -0.94445000148147 | -2.49639999964360 |

|               |                   |                   |                    |
|---------------|-------------------|-------------------|--------------------|
| H             | -3.77549000049291 | 0.36400999904640  | -3.55353000053626  |
| F             | -8.47291000139003 | -2.59752999757196 | -1.10938000082777  |
| C             | -6.35169999743309 | 1.10661999774874  | -3.91518000265975  |
| F             | -6.13345999822658 | 0.93000999903161  | -5.25013000133017  |
| F             | -7.68210999966871 | 1.32598000050208  | -3.75487000080618  |
| C             | 0.10996000229729  | -4.81721000022752 | 4.55724999797780   |
| C             | -2.02294000244517 | -6.03531999972229 | 4.99041000210863   |
| C             | -1.40585000243954 | -4.08844999882906 | 6.42482000011596   |
| C             | 6.29308000061118  | -1.38248000231704 | 1.54252999823815   |
| H             | 7.77094999980297  | -0.03638999789465 | 2.36383000151416   |
| C             | 4.02272999950727  | -0.98856999767549 | 2.22004000194018   |
| H             | 3.68349000238488  | 0.63296999901878  | 3.58965000163836   |
| H             | 0.63240999769283  | -3.85485999756082 | 4.47593999900980   |
| H             | 0.64956999746330  | -5.43953999760527 | 5.28720999867332   |
| H             | 0.16900000178366  | -5.31849000211699 | 3.58070999736262   |
| H             | -1.47975999792223 | -6.70111999971413 | 5.67645999992553   |
| H             | -3.06826999738701 | -5.98747999875962 | 5.32867000103072   |
| H             | -2.00252999737172 | -6.49959999998217 | 3.99328999824195   |
| H             | -0.91498000105110 | -4.78612999928466 | 7.12010000205165   |
| H             | 2.18019975854093  | 3.09103884850721  | -4.89052215376743  |
| 178           |                   |                   |                    |
| 3b_1 (TS1-1') |                   |                   |                    |
| C             | -3.90652000156903 | 1.38616000124258  | -3.18522000205027  |
| C             | -6.25928000239687 | 0.19539000030002  | -2.27747000086921  |
| H             | 3.00773874258799  | 2.94116982366041  | -4.95908308126213  |
| H             | -5.07235000147132 | -1.59459000227057 | -2.00435999704620  |
| H             | -6.82006000143435 | -6.87530000126407 | 2.56350999935427   |
| C             | 2.36630995168446  | 3.07379000969058  | -4.09989993591021  |
| H             | 5.08231999737139  | -3.22116999952028 | -0.34347000252725  |
| C             | -5.08236999894661 | -0.55159000105236 | -2.31888000072360  |
| C             | 4.08321999750129  | -1.92355999895655 | -3.26975000176258  |
| C             | 1.00327003754130  | 2.75326998002060  | -4.14507009843290  |
| C             | 2.86313008265751  | 3.55871999809130  | -2.87815006335491  |
| C             | 5.40083999827457  | -2.62742000064002 | 0.51319999897687   |
| F             | 7.34327999751551  | -2.58014999765564 | -1.59612000164905  |
| C             | 7.75920000087892  | -2.76097999933274 | -0.30767000018642  |
| F             | 8.95648999936783  | -2.13490999968477 | -0.18149999824649  |
| C             | -3.90969000071669 | 0.06065000013485  | -2.76297999792643  |
| F             | 7.98870000209013  | -4.09664000039520 | -0.16180000081101  |
| C             | 3.48303000202279  | -0.76144999735176 | -2.75979999766238  |
| C             | 3.47795000132861  | -2.66679999794192 | -4.28400000118817  |
| H             | 5.03824000160882  | -2.25956999979455 | -2.86222000262821  |
| C             | 0.17743999352791  | 2.89834000989387  | -3.03079995810905  |
| H             | 0.56157999373048  | 2.36383000956490  | -5.06129997087957  |
| C             | 2.04300996049724  | 3.71796000092046  | -1.76743997897266  |
| H             | 3.92041997391635  | 3.81425000030333  | -2.78369998672075  |
| C             | 4.19491000195816  | 0.04850999763906  | -1.74699000085568  |
| C             | 2.23231999802007  | -0.39328999870543 | -3.28750000267975  |
| C             | 2.24662000156505  | -2.28415000069801 | -4.83325000162738  |
| H             | 3.98699000069979  | -3.55979999919005 | -4.64607000052292  |
| C             | 0.67861000264625  | 3.38809000055701  | -1.81560000542484  |
| H             | -0.87208000262632 | 2.62739999594748  | -3.119380000808961 |
| H             | 2.47317000580071  | 4.08562000238690  | -0.83674000369071  |
| C             | 3.52787999823308  | 0.71427000251151  | -0.68197000010725  |
| C             | 5.57281000195578  | 0.18945999822590  | -1.79557999911027  |
| C             | 1.63721999955897  | -1.13703999810066 | -4.29920999893425  |
| H             | 1.72658000247929  | 0.50054999697182  | -2.93365999754364  |
| C             | 1.56144999904045  | -3.04417999877125 | -5.97198000144381  |

|   |                   |                   |                   |
|---|-------------------|-------------------|-------------------|
| C | -0.19588000058702 | 3.64597999902782  | -0.64962000096177 |
| O | 2.13007000161926  | 0.62618000063869  | -0.63817999757214 |
| C | 4.16705999760280  | 1.45026999803749  | 0.30793000088780  |
| H | 6.12395000112789  | -0.25828999842128 | -2.62352000160405 |
| C | 6.29849000150852  | 0.87567999982243  | -0.79580000154178 |
| H | 0.66402000137614  | -0.80757999936536 | -4.66437000146310 |
| C | 2.38396999921212  | -4.24942000106323 | -6.44640000014774 |
| C | 1.36609999917579  | -2.08457999775440 | -7.16469999909162 |
| C | 0.18449999909186  | -3.54756999951488 | -5.49517000034031 |
| C | -1.31615000021680 | 2.82643000292724  | -0.32582000176387 |
| C | -0.00144000210621 | 4.76508000211454  | 0.14458999850879  |
| P | 1.50030000145900  | -0.35086000025290 | 0.48107000050922  |
| C | 5.60015000050825  | 1.48906000165244  | 0.29724999803147  |
| C | 3.36524999558332  | 2.16518000059243  | 1.33682999912814  |
| C | 7.71678999842674  | 0.93778999949577  | -0.83341000148788 |
| H | 2.53340000122771  | -4.98322999875989 | -5.64041999984774 |
| H | 1.85369999764879  | -4.75767999849643 | -7.26451999767862 |
| H | 3.37130999865253  | -3.94669999854395 | -6.82495000121593 |
| H | 0.87952000036807  | -2.61169999790196 | -7.99917000070118 |
| H | 0.73482999735784  | -1.22787000102575 | -6.89262000254674 |
| H | 2.33290000115055  | -1.69693000082750 | -7.51770000159871 |
| H | 0.30356000253776  | -4.27188000159404 | -4.67592999925905 |
| H | -0.45484999893343 | -2.73153000180074 | -5.13234000202566 |
| H | -0.34198999971324 | -4.05324000261863 | -6.31883000168576 |
| O | -1.47088999825429 | 1.62716000192741  | -1.03257999851244 |
| C | -2.28752999887729 | 3.16926999817791  | 0.60167999926492  |
| H | 0.83561999903445  | 5.43146999730878  | -0.07041000106228 |
| C | -0.86288000271924 | 5.08933000345175  | 1.21802999715106  |
| O | 2.23271000176147  | 0.11340999915764  | 1.83955000027956  |
| N | -0.03200000220916 | -0.10732000110839 | 0.49277000171855  |
| N | 2.03608999749789  | -1.87564000214645 | 0.24308000051853  |
| C | 6.36228999756797  | 2.07526000211307  | 1.34020999881294  |
| C | 3.51360999581254  | 3.57588000054940  | 1.55943999423938  |
| C | 2.39355999047952  | 1.49063001776863  | 2.06564999322017  |
| H | 8.23546000165794  | 0.47306999876384  | -1.67405999903187 |
| C | 8.42629999881018  | 1.54030999921546  | 0.18273999807509  |
| P | -1.38528000063313 | 0.21390000006413  | -0.24379999924986 |
| C | -3.56438999793419 | 2.41321999928654  | 0.69318999750752  |
| C | -2.03849000061413 | 4.30095000105507  | 1.44731000191261  |
| C | -0.59654000161964 | 6.19775000248767  | 2.06472999921136  |
| S | 2.78232000153621  | -2.84892000129246 | 1.35202999741478  |
| H | 1.32231999932726  | -2.60768999887816 | -0.64105000106572 |
| C | 7.74077000231239  | 2.09929999842860  | 1.28491999791941  |
| H | 5.84664999954851  | 2.49751000171799  | 2.20116000165366  |
| C | 4.37658999889783  | 4.39742999846384  | 0.78573000175014  |
| C | 2.71270000254434  | 4.20203999714005  | 2.57138000655356  |
| C | 1.54784001439819  | 2.09508999713248  | 3.03546000277175  |
| H | 9.51623000136747  | 1.57034000148713  | 0.14768000239916  |
| O | -2.37639999753249 | 0.36348999774912  | 1.03169000049094  |
| N | -1.89254999741909 | -0.91141000208348 | -1.24306000090143 |
| C | -3.59184999865293 | 1.04367999910722  | 0.92565000088720  |
| C | -4.81134999756107 | 3.10788999766215  | 0.53388000059271  |
| C | -2.87589000029737 | 4.63826000226621  | 2.54261000071256  |
| H | 0.29611000259926  | 6.79473999907767  | 1.86909000050057  |
| C | -1.43086000219412 | 6.50046999916007  | 3.11890000046582  |
| O | 2.85941999903169  | -4.15070999927383 | 0.70470999798696  |
| O | 2.20164000234757  | -2.71711999843029 | 2.67825000101069  |
| H | 8.30517999846987  | 2.54144000215994  | 2.10681000204443  |

|   |                   |                   |                   |
|---|-------------------|-------------------|-------------------|
| H | 4.95914000062643  | 3.94859999860893  | -0.01711999868993 |
| C | 4.47647999789367  | 5.75228000232480  | 1.02625999902673  |
| C | 2.86108999649465  | 5.59410000232636  | 2.81324999959276  |
| C | 1.75868002685565  | 3.44213999718531  | 3.28378003669114  |
| C | 0.44987992408501  | 1.37250993777519  | 3.71707985636462  |
| S | -2.36599999852254 | -0.85883999847202 | -2.76903999787228 |
| C | -4.79430000851316 | 0.32097000022092  | 1.19003999528962  |
| C | -6.03216999788928 | 2.40101999909764  | 0.78379000217930  |
| C | -4.89193000193628 | 4.45439999965300  | 0.09311000040027  |
| C | -2.57434000264817 | 5.70547000287781  | 3.36355000069458  |
| H | -3.75587999870622 | 4.02841999841945  | 2.74362999882353  |
| H | -1.21061999864947 | 7.34926000141702  | 3.76813000175951  |
| H | 5.14048999863775  | 6.36127999917133  | 0.41116000218961  |
| C | 3.72569999857510  | 6.35731000156341  | 2.06018999544903  |
| H | 2.25710999641147  | 6.04812000275533  | 3.60120999860342  |
| H | 1.14972000169107  | 3.94343000114550  | 4.03790999851859  |
| C | 0.56837018845672  | 0.06769021659493  | 4.22494053200794  |
| C | -0.77783018602110 | 2.02777988420308  | 3.88847972957911  |
| O | -1.45409999929995 | -0.12194999891959 | -3.63945000100915 |
| O | -2.70739999736575 | -2.23646000030639 | -3.14521999952978 |
| C | -5.98048000108734 | 1.03599000066980  | 1.14254000165960  |
| C | -4.84004995838553 | -1.12203999200884 | 1.52263002844545  |
| C | -7.27250000048760 | 3.07392000163508  | 0.62583000298869  |
| C | -6.11285000118425 | 5.07650000060703  | -0.06595000075470 |
| H | -3.97601999840983 | 4.99293000214485  | -0.14453000114794 |
| H | -3.22308000096957 | 5.93598000160952  | 4.20981000249478  |
| H | 3.82546000300907  | 7.42685000094211  | 2.25086000319910  |
| C | -0.49431000514866 | -0.52883017304236 | 4.89783955217832  |
| H | 1.49366995328608  | -0.49254003778023 | 4.10138991588884  |
| C | -1.84150964852930 | 1.41554013881325  | 4.54624030006405  |
| H | -0.91557997039919 | 3.02623001148305  | 3.47462003564855  |
| H | -6.91792000150553 | 0.50730999784840  | 1.32329999900575  |
| C | -5.66540007242246 | -1.57104001130976 | 2.56928995187139  |
| C | -4.15701998432676 | -2.09054999934813 | 0.77819000959297  |
| H | -8.19273000046773 | 2.51891999830518  | 0.81793000174981  |
| C | -7.31501000169366 | 4.38749000242290  | 0.21215000019455  |
| H | -6.14995999758570 | 6.10531999998210  | -0.42639999825408 |
| F | 6.55660000017767  | -1.24716000255189 | 5.09594999887804  |
| C | -1.72468023891522 | 0.12568999815766  | 5.08022998633896  |
| H | -0.34889000026385 | -1.53610997060083 | 5.29163007620474  |
| H | -2.77775008774860 | 1.96592998257709  | 4.63442996848397  |
| C | -5.78232001812365 | -2.92723000113988 | 2.85673998369287  |
| H | -6.20282992893849 | -0.84316998929275 | 3.18029005041621  |
| C | -4.28968000125698 | -3.44937999961548 | 1.06069999812879  |
| H | -3.51264000840939 | -1.79052000189966 | -0.04495000552260 |
| H | -8.27339000046384 | 4.89252999889354  | 0.08353999918379  |
| C | 6.59883999912468  | -0.42512999932259 | 4.00832999768377  |
| H | -2.54799272886839 | -0.35467110512550 | 5.58900758116212  |
| C | -5.09409997486391 | -3.90112999603351 | 2.11275002161473  |
| H | -6.41834999077117 | -3.22960999918479 | 3.69092000622525  |
| H | -3.73735000796762 | -4.15380999914894 | 0.43923999657515  |
| F | 7.86018999966972  | 0.07195999860447  | 3.93518000121694  |
| C | 6.19109000000549  | -1.16013000018315 | 2.75599000094859  |
| F | 5.76353999898667  | 0.61724000061588  | 4.27739000109571  |
| F | -8.20007000054775 | -1.01836000224596 | -2.90388999838384 |
| H | -7.19068999794552 | 2.11568000159300  | -2.62885000151870 |
| F | -4.94538000096564 | 3.58475000074760  | -4.99834999920050 |
| C | -5.22899999684151 | -5.38436999750120 | 2.46720999935983  |

|               |                   |                   |                   |
|---------------|-------------------|-------------------|-------------------|
| C             | 7.14099000259480  | -1.53709999968177 | 1.80670000200690  |
| C             | 4.85019999842448  | -1.51757000078753 | 2.60100999873374  |
| C             | -6.27224000206443 | 1.53382000061332  | -2.68162999890483 |
| F             | -7.33308000096557 | -1.45878000022363 | -0.94457999912741 |
| H             | -2.98168000040474 | 1.83159000020389  | -3.54799000215955 |
| C             | -7.54418000265511 | -0.46458000139531 | -1.84292999786095 |
| C             | -5.09429000164731 | 2.12021999808559  | -3.14039999953984 |
| F             | -8.40663000042974 | 0.42340999869094  | -1.27140999798052 |
| C             | -5.07880000056256 | 3.54261000038699  | -3.64021000000001 |
| F             | -6.21404000251921 | 4.21741999909693  | -3.33116000090022 |
| F             | -4.03006999971878 | 4.24575999981584  | -3.12713999867418 |
| C             | -4.79483000137969 | -5.59785000154634 | 3.93204999526197  |
| C             | -4.35302000455071 | -6.27206000306524 | 1.57076999989586  |
| C             | -6.70090000230556 | -5.81293999811677 | 2.30130999970171  |
| C             | 6.73910000042168  | -2.27073999926451 | 0.68870000085577  |
| H             | 8.18478000184593  | -1.25841999924004 | 1.93380000121396  |
| C             | 4.46954999911459  | -2.24695000191668 | 1.47792000110293  |
| H             | 4.10501999825648  | -1.25498999967094 | 3.35019999810486  |
| H             | -5.41358999904828 | -5.01659000184764 | 4.62986000101002  |
| H             | -4.88678000138239 | -6.66056000031553 | 4.20320000198959  |
| H             | -3.74748999999953 | -5.29552000139679 | 4.07263999874842  |
| H             | -4.47955999961955 | -7.32461000078187 | 1.86413000091226  |
| H             | -4.62904999993537 | -6.18226000108354 | 0.51042999857833  |
| H             | -3.28731000206344 | -6.02001999918099 | 1.66762999840031  |
| H             | -7.36840000211937 | -5.22688999912727 | 2.94872000224927  |
| H             | -7.03166000172890 | -5.67497000124388 | 1.26183000127755  |
| 178           |                   |                   |                   |
| 3b_1 (TS1-2') |                   |                   |                   |
| C             | 6.06020000169310  | 2.87504999930436  | 2.55422999838886  |
| F             | 6.02401000105706  | 2.99092000080527  | 1.19201000060770  |
| H             | 3.07735423394003  | -5.20350017576578 | -3.54056647609182 |
| C             | -3.63898000168433 | -1.93033000094335 | -3.34545999894997 |
| F             | 6.45429000058934  | 4.08248999763768  | 3.03887999797976  |
| C             | 2.68407994893277  | -4.19742986119626 | -3.55666998171864 |
| H             | 5.05008999913552  | 0.34114999968820  | 2.69754999866985  |
| H             | -2.72238999806709 | -2.41825999981535 | -3.67279999760546 |
| C             | 1.60212999728106  | -4.26885999446855 | -0.07600002098782 |
| C             | 1.30889001748081  | -3.94780018218218 | -3.65101055041806 |
| C             | 3.52701007102591  | -3.07614013629842 | -3.47221963701100 |
| F             | 7.03782000009680  | 1.97916000252984  | 2.84581000044230  |
| H             | -8.19398000167819 | 1.65758000261057  | 4.97712000229431  |
| C             | 4.36626000024886  | 1.10085999905424  | 3.07616999923519  |
| C             | -5.18576000205479 | -1.39121999893874 | -1.55406000227581 |
| C             | -4.00434000165381 | -1.98215999813073 | -2.00340999792748 |
| C             | -4.45383999785150 | -1.24380999863716 | -4.24815999838497 |
| C             | 2.70251999935700  | -4.14102000102130 | 0.78669999868765  |
| C             | 0.53256000220287  | -5.10449000058773 | 0.24002000088561  |
| H             | 1.57604001731228  | -3.72213999012302 | -1.01546984167039 |
| C             | 0.79460002693129  | -2.65095991842677 | -3.64575019299740 |
| H             | 0.60386999486316  | -4.77568995410473 | -3.71371979888220 |
| C             | 3.02253994302635  | -1.78228996166148 | -3.46912984250611 |
| H             | 4.60702998165798  | -3.21189996778880 | -3.39048018693103 |
| C             | 3.85529999829326  | -3.25813000094231 | 0.50524000011216  |
| C             | 2.67924999728155  | -4.87875000139702 | 1.98253000000883  |
| C             | 0.51044000036763  | -5.85470999638152 | 1.42543000013254  |
| H             | -0.30363000180485 | -5.14351999745273 | -0.45732000161450 |
| C             | 1.64043000310893  | -1.53547001088135 | -3.54950991626358 |
| H             | -0.28247001120491 | -2.51887001584726 | -3.71621989611227 |

|   |                   |                   |                   |
|---|-------------------|-------------------|-------------------|
| H | 3.71449001412749  | -0.94683000613804 | -3.36791009858091 |
| C | 3.69309000106792  | -1.95345000249116 | -0.03119000139404 |
| C | 5.14636999805810  | -3.62619000037515 | 0.84130000196278  |
| C | 1.61192000017184  | -5.71942999916169 | 2.28694999914177  |
| H | 3.48954999980300  | -4.75380999877996 | 2.70228999824829  |
| C | -0.63011999977112 | -6.82734999916909 | 1.74463000288935  |
| C | 1.14041998724060  | -0.14311001000996 | -3.58692006065035 |
| O | 2.39432999770640  | -1.56214999982627 | -0.39035999742568 |
| C | 4.71214999938164  | -1.02993999770752 | -0.19508999899939 |
| H | 5.32995000125932  | -4.63145999971954 | 1.22499000205297  |
| C | 6.23094999783794  | -2.72164999876564 | 0.76692999770845  |
| H | 1.63990000173503  | -6.26807000150871 | 3.22904000244956  |
| C | -0.94767000233851 | -6.83759999851924 | 3.25176999978339  |
| C | -0.17751999817171 | -8.24200999849227 | 1.32223999827941  |
| C | -1.91752999804868 | -6.46887000232688 | 0.98501000036039  |
| C | -0.12970998008485 | 0.24904001127612  | -3.07198995410554 |
| C | 1.89622998886877  | 0.86082999653675  | -4.17628002394803 |
| P | 1.65707999919644  | -0.56989999801185 | 0.63554999781394  |
| C | 6.01843999810596  | -1.38760999986813 | 0.28180999875593  |
| C | 4.44576000283892  | 0.29102000096019  | -0.82131999930028 |
| C | 7.52503000023340  | -3.09441000205499 | 1.21730999999308  |
| H | -0.10650999968684 | -7.20514999797162 | 3.85496000148236  |
| H | -1.20709000056074 | -5.83038999794481 | 3.60925000052323  |
| H | -1.80524999829247 | -7.49798000131785 | 3.44677000183263  |
| H | 0.04112000069601  | -8.27428000246660 | 0.24517000191499  |
| H | 0.73147999866388  | -8.54368999836588 | 1.86260000151700  |
| H | -0.96822000138789 | -8.97764000063505 | 1.53631000166137  |
| H | -2.24874000190168 | -5.44161999747395 | 1.19210999925976  |
| H | -1.79848000139081 | -6.56055000105275 | -0.10276999747528 |
| H | -2.72419999793357 | -7.15357000008710 | 1.28507999989498  |
| O | -0.88409000330480 | -0.70437000342759 | -2.36141000474257 |
| C | -0.67990000046104 | 1.51096000141807  | -3.23581999917344 |
| H | 2.86616999907633  | 0.61103000051140  | -4.60903999777962 |
| C | 1.46304000135884  | 2.20430999929198  | -4.23727999176747 |
| O | 2.62033000181088  | 0.72452000145298  | 0.69833000153767  |
| N | 0.25153999930131  | -0.27336000175226 | 0.05357000075052  |
| N | 1.56953000043750  | -1.07840999979273 | 2.17240999970735  |
| C | 7.09578999798842  | -0.46666000125835 | 0.34442999863623  |
| C | 5.23804000258101  | 0.74008999822570  | -1.93345999799345 |
| C | 3.43598999922468  | 1.13158000117701  | -0.36494000257464 |
| H | 7.67661999777762  | -4.11592000048622 | 1.57216000060334  |
| C | 8.55843999809475  | -2.18339999958236 | 1.23905000197493  |
| P | -1.07005000099855 | -0.46158000029776 | -0.77126000177377 |
| C | -2.09489000071925 | 1.78542999834067  | -2.87339000525230 |
| C | 0.15452999944931  | 2.54926999872239  | -3.76622000195999 |
| C | 2.30303000198893  | 3.22458999810928  | -4.75722999993740 |
| S | 2.63693999917383  | -1.00262000191127 | 3.43172000090084  |
| H | 0.41643999936175  | -1.73469000143999 | 2.51310000146269  |
| C | 8.33318999898182  | -0.85390999839583 | 0.81673000246163  |
| H | 6.93529000038216  | 0.56361000194824  | 0.03036999858291  |
| C | 6.14673000278173  | -0.11036999749311 | -2.61729999963780 |
| C | 5.07403000156432  | 2.08031999865680  | -2.41291999952074 |
| C | 3.25253999795026  | 2.46695000394469  | -0.82616999806194 |
| H | 9.54398999741010  | -2.47934999994065 | 1.60123000133982  |
| O | -1.69606999803313 | 1.03548999733473  | -0.63842000086580 |
| N | -2.07113799999515 | -1.53579000054020 | -0.18675000212836 |
| C | -2.56671999859949 | 1.57134999965810  | -1.58575999723079 |
| C | -3.00096000076896 | 2.30275999855506  | -3.85850000072549 |



|   |                   |                   |                   |
|---|-------------------|-------------------|-------------------|
| C | -0.23469000222550 | 3.91317999843695  | -3.78198999985354 |
| H | 3.29185999928856  | 2.94396000045063  | -5.12548999893280 |
| C | 1.89159000020989  | 4.53924999761422  | -4.76922000123538 |
| O | 3.86045999950679  | -1.73784999903131 | 3.16024000130634  |
| O | 1.83602999805515  | -1.33215000040070 | 4.60200000087147  |
| H | 9.14123000148950  | -0.12309000008522 | 0.87167000048804  |
| H | 6.25754999965051  | -1.14209000005341 | -2.28635000212042 |
| C | 6.87300000073564  | 0.34579000007025  | -3.69802000111734 |
| C | 5.85463999847449  | 2.52716999782145  | -3.51195000235459 |
| C | 4.10728999350009  | 2.91918000077606  | -1.81503000126307 |
| C | 2.19364001881515  | 3.36657998753570  | -0.31289999894038 |
| S | -2.88109999778473 | -2.75305999975627 | -0.83217999790225 |
| C | -3.84554999780242 | 2.01296000065003  | -1.13627999929105 |
| C | -4.31055000159866 | 2.71097000193600  | -3.44319000143656 |
| C | -2.67154000207219 | 2.39074999772991  | -5.23568999877927 |
| C | 0.61769000054281  | 4.88527000189081  | -4.26192000039922 |
| H | -1.21028000273399 | 4.19184999762308  | -3.38629000064682 |
| H | 2.54995999861229  | 5.31728999759899  | -5.15903000192429 |
| H | 7.55444999816761  | -0.33170000086929 | -4.21452000233768 |
| C | 6.73899000061829  | 1.68050000114296  | -4.14394999834639 |
| H | 5.72657000187076  | 3.55631999767502  | -3.85420999851536 |
| H | 3.97710000075991  | 3.93244000004320  | -2.19815000065468 |
| C | 2.48543001794428  | 4.68724991944895  | 0.05560015801195  |
| C | 0.85223001218825  | 2.96398005389716  | -0.28724017041708 |
| O | -2.04021999851242 | -3.66406000093772 | -1.60098000222380 |
| O | -3.70741999819444 | -3.31200000235930 | 0.24529999964991  |
| C | -4.67609999748667 | 2.59114999893101  | -2.08377999826661 |
| C | -4.30456000162394 | 1.91858000201329  | 0.26873999931028  |
| C | -5.22395999755942 | 3.20724999840840  | -4.41041000090226 |
| C | -3.58403000225805 | 2.87013000058693  | -6.15233999853218 |
| H | -1.69207000030642 | 2.05302000125858  | -5.57091000176387 |
| H | 0.30694999354308  | 5.93097000475724  | -4.24618001911368 |
| H | 7.32713999743932  | 2.03224000082330  | -4.99271000201179 |
| C | 1.46593992165321  | 5.57725017081984  | 0.40442988639550  |
| H | 3.52460000171845  | 5.02314000490019  | 0.07024998564206  |
| C | -0.15665011623027 | 3.85537000679814  | 0.05191019286244  |
| H | 0.58749000288065  | 1.95188999153525  | -0.57467997851595 |
| H | -5.67264000195326 | 2.91600999799996  | -1.78023999861818 |
| C | -4.17641999992323 | 0.75688000195943  | 1.04052999779912  |
| C | -4.97855999931071 | 3.01027000043461  | 0.84630999766217  |
| H | -6.21966000207259 | 3.50848000187284  | -4.07860000011613 |
| C | -4.86932000081564 | 3.28845999879356  | -5.73939999838519 |
| H | -3.31560000022196 | 2.91123999990205  | -7.20879000160964 |
| F | 2.27609000204768  | 5.17061999864082  | 5.02261000135884  |
| C | 0.11926011292656  | 5.18826989952377  | 0.39192995858058  |
| H | 1.73842001656134  | 6.59500995837293  | 0.68288001150924  |
| H | -1.18810996759005 | 3.50187999520035  | 0.02284997283303  |
| C | -4.74098999805470 | 0.66816999952852  | 2.31311000125073  |
| H | -3.64413999805759 | -0.10630000103938 | 0.64591999765709  |
| C | -5.53092000070902 | 2.91962999874664  | 2.11955999766354  |
| H | -5.06285999768264 | 3.94467000068798  | 0.28761999965085  |
| H | -5.58127000028915 | 3.66349999914907  | -6.47598000067003 |
| C | 1.63446000169066  | 4.03714999918988  | 4.63117000012776  |
| H | -0.66984623479791 | 5.87891166432416  | 0.65232869869812  |
| C | -5.44405000032489 | 1.73914000076956  | 2.87736000068414  |
| H | -4.61832000062127 | -0.26825000241616 | 2.85699999755708  |
| H | -6.04998000225911 | 3.79020999997523  | 2.52479999845295  |
| F | 0.71091999779941  | 4.41117000057849  | 3.69885999843140  |

|   |                   |                   |                   |
|---|-------------------|-------------------|-------------------|
| C | 2.58796000243106  | 3.00461000034315  | 4.08442999840363  |
| F | 0.94526999859588  | 3.57103999825531  | 5.70631000253076  |
| F | -8.31941999835751 | -0.98159000221384 | -2.11017999826908 |
| C | -4.05310999966100 | -1.21521999867909 | -5.70148000103372 |
| F | -4.22781999817309 | -2.43679000218250 | -6.28512000062785 |
| C | -6.13794999804306 | 1.64381999816755  | 4.23942999791780  |
| C | 3.83357000253033  | 3.40566000251619  | 3.59830999737118  |
| C | 2.20700000131388  | 1.66123999854763  | 4.04827000207701  |
| F | -7.63071999753538 | 0.99170000159299  | -2.75781000032441 |
| C | -7.28704000163371 | -0.09462000168810 | -2.00844999805064 |
| F | -7.23540000032401 | 0.30692999879522  | -0.71417999982534 |
| C | -5.62474999912659 | -0.62386999831594 | -3.81563000086901 |
| H | -5.46450000064395 | -1.45338000076106 | -0.50292000142203 |
| C | -5.98874999765554 | -0.70931999928268 | -2.46873000073626 |
| H | -6.24343999812555 | -0.06932999843085 | -4.51897000137585 |
| F | -2.73639999849275 | -0.89841999829918 | -5.85317000246521 |
| F | -4.77460000051231 | -0.32185000201366 | -6.42296000047109 |
| C | -5.70016000024583 | 2.81259000158471  | 5.14402999752614  |
| C | -5.81417000208185 | 0.32660999862499  | 4.95941999836377  |
| C | -7.66298000014901 | 1.72068999927183  | 4.01486999825560  |
| C | 4.72188000141789  | 2.44968000226707  | 3.10455000040895  |
| H | 4.11849999864739  | 4.45570999885612  | 3.62676999961645  |
| C | 3.10375000095135  | 0.72735999958494  | 3.53298000173761  |
| H | 1.23229000126644  | 1.34286000202227  | 4.41833000034496  |
| H | -5.95190000185912 | 3.78803000154627  | 4.70552999738047  |
| H | -6.20611000159283 | 2.74406000262020  | 6.11894000005497  |
| H | -4.61538999934435 | 2.78572000222959  | 5.31525999969045  |
| H | -6.32252000199023 | 0.30772000215362  | 5.93471999920305  |
| H | -6.15145999800489 | -0.54849999764199 | 4.38650000188026  |
| H | -4.73419999830177 | 0.22090999987039  | 5.13442000183794  |
| H | -7.94922000090497 | 2.66372000134999  | 3.52798000214177  |
| H | -8.00479000023677 | 0.89365000022392  | 3.37620999967973  |

158

3b\_2 (cat)

|   |                    |                   |                   |
|---|--------------------|-------------------|-------------------|
| H | 0.83586000679889   | -5.83991003433506 | 1.29774000282563  |
| H | -5.37322999349435  | 2.05755999721857  | -0.22900999964629 |
| C | -3.83478999294965  | 3.87792000088098  | -4.30791999767644 |
| C | -2.36741999816402  | 4.33714999886984  | -4.43634000114878 |
| H | -5.28611000359554  | 3.82624999766379  | -1.90384000176365 |
| C | -4.779769998102137 | 1.89882999610064  | -1.13000999431507 |
| H | 1.17063269562912   | -3.39937002067521 | 1.78821672276092  |
| C | -3.26420013820579  | 0.57659011285153  | -2.43855998956466 |
| C | -4.72109999127303  | 2.91275000100417  | -2.08503999715241 |
| C | -3.93564998303981  | 2.78637000037042  | -3.23810999189347 |
| C | -3.21495000391037  | 1.59119000086460  | -3.38690000311759 |
| C | 0.21410988871268   | -3.80058022406447 | 1.49078012008225  |
| C | 0.00386006774987   | -5.13985983189224 | 1.19957980467459  |
| C | -1.25097998733935  | -5.63645001833070 | 0.77498000971174  |
| C | -1.41872002450582  | -7.00243001349314 | 0.42255005320658  |
| C | -2.62642999419112  | -7.47150999800136 | -0.04642002131309 |
| C | -3.72117000162705  | -6.58703999914102 | -0.18107999690740 |
| C | -3.59716999851470  | -5.25799999371927 | 0.16882998685392  |
| C | -2.37046001421994  | -4.74485000254013 | 0.66550002396500  |
| C | -2.18320003138302  | -3.36683006110494 | 1.00670006039647  |
| C | -0.91757992364262  | -2.94596984851212 | 1.37970993898938  |
| O | -0.75090002440230  | -1.58188003439794 | 1.64662997293190  |
| P | -0.68402000093389  | -0.59112999986219 | 0.36668000722059  |
| N | -0.93473999740708  | 0.90381000291796  | 0.82916999860601  |

|   |                   |                   |                   |
|---|-------------------|-------------------|-------------------|
| S | -0.65496000096176 | 1.46620000101376  | 2.31421999804210  |
| O | -0.73286999945068 | 2.92170999852615  | 2.24804000111647  |
| O | 0.51071999971752  | 0.85799999874657  | 2.95701000238083  |
| C | -2.09426999972221 | 0.90075999842887  | 3.24050000173838  |
| C | -1.97207000161178 | -0.19689000084250 | 4.08716000241501  |
| C | -3.10503000125171 | -0.68644000137489 | 4.74160999796871  |
| C | -4.34557999837240 | -0.07403000226688 | 4.56952999963857  |
| C | -4.44295000173602 | 1.04567999804419  | 3.73976000184860  |
| C | -3.32273000157096 | 1.53683999907351  | 3.06691000144668  |
| H | -3.39683999961033 | 2.40640000072082  | 2.41580999920628  |
| C | -5.75377000133027 | 1.77555000157240  | 3.59659000206841  |
| F | -6.02273000058178 | 2.09389999906862  | 2.29624000019429  |
| F | -6.80789000009731 | 1.05245000012759  | 4.05673000055064  |
| F | -5.74567999833597 | 2.95142000200247  | 4.28670000107427  |
| H | -5.22807000053779 | -0.46736000213886 | 5.06947999927831  |
| C | -2.94619000079946 | -1.87879999978646 | 5.64912999738346  |
| F | -2.32245000014082 | -2.91385000247531 | 5.01484999857772  |
| F | -4.13309000166816 | -2.34638000206204 | 6.11355000209461  |
| F | -2.18072999892961 | -1.57694000019892 | 6.73761000148848  |
| H | -0.99795999862329 | -0.66432000247760 | 4.22043999754097  |
| N | 0.59804000736038  | -0.97146000158502 | -0.49359998788742 |
| P | 1.81167998188186  | -0.24308000163880 | -1.10149996142587 |
| N | 1.75215999504959  | 1.41529000064966  | -1.30399999425532 |
| S | 0.95367000086667  | 2.16173999867949  | -2.59887999825290 |
| O | -0.13264999782617 | 1.26476999856221  | -2.93608000130377 |
| O | 1.94282999759787  | 2.56892000053474  | -3.57843000109498 |
| C | 0.33269000206631  | 3.65563999797768  | -1.83732000010531 |
| C | -0.82239000260178 | 3.63976999959167  | -1.04691000158290 |
| C | -1.28556000076672 | 4.85707999965919  | -0.54988999797001 |
| C | -0.61206999746029 | 6.05265999906645  | -0.82377999752349 |
| C | 0.53838999826932  | 6.03750999950859  | -1.60442999939560 |
| C | 1.01762000065004  | 4.83292000142417  | -2.12357000206415 |
| H | 1.90292999754171  | 4.80440000148134  | -2.75767000194400 |
| C | 1.30149999826232  | 7.30409999745541  | -1.89817000229839 |
| F | 0.69568999784513  | 8.40451000010137  | -1.39012999969761 |
| F | 2.56096000008247  | 7.25491000201459  | -1.36740000237172 |
| F | 1.45234999958225  | 7.49898999936428  | -3.23601999793933 |
| H | -0.98633000120603 | 6.99271999938803  | -0.42033999834772 |
| C | -2.54070000088585 | 4.95645999798764  | 0.28420999761804  |
| F | -2.30560999917715 | 5.58442999785871  | 1.46547000132634  |
| F | -3.09591999873437 | 3.75817999889126  | 0.55029999916704  |
| F | -3.48715000112872 | 5.70547000249000  | -0.36816999967465 |
| H | -1.33501000230726 | 2.70473000195449  | -0.81917999761618 |
| H | 2.56958000245643  | 1.93409000087610  | -0.94894000410872 |
| O | 2.20455000824694  | -0.86057998492754 | -2.53798015690352 |
| C | 2.71401007204487  | -2.18009015721417 | -2.46265987474602 |
| C | 4.04333994744278  | -2.32256997425334 | -2.08783986148678 |
| C | 4.57380998129936  | -3.64339999335872 | -1.93364995061473 |
| C | 5.88489999030822  | -3.89940999831760 | -1.45339997669342 |
| C | 6.34145999335463  | -5.19102999840323 | -1.29078998770964 |
| C | 5.51135999025466  | -6.29221999660122 | -1.60360997989940 |
| C | 4.22883995999696  | -6.07785999894299 | -2.05820989298824 |
| C | 3.72150011379737  | -4.76053999794747 | -2.22047018908263 |
| C | 2.38508011603998  | -4.53627017576390 | -2.62187039413806 |
| C | 1.83752974338638  | -3.26588969080622 | -2.73055983800397 |
| H | 0.80878339869015  | -3.08367939569727 | -2.99968435232182 |
| H | -4.38848999927476 | 5.57072000048322  | -3.02653999866341 |
| C | -4.69627000040809 | 5.10302000113046  | -3.97289000018309 |

|   |                   |                   |                   |
|---|-------------------|-------------------|-------------------|
| H | -3.69272000027126 | 2.44639999807110  | -5.97093999917643 |
| C | -4.30711000061548 | 3.30215999893935  | -5.65895000224645 |
| H | -2.27214000142487 | 5.08282000098916  | -5.24002999804796 |
| H | -1.69663000012061 | 3.49859999891768  | -4.66889000023135 |
| H | -5.35117999854394 | 2.96319999939995  | -5.59471000106918 |
| H | -4.67200000235362 | -6.95709000138512 | -0.56760999618991 |
| H | -3.86202999943979 | -4.15828000090517 | 2.86885000053991  |
| H | -7.84941999988095 | -2.71999000150055 | 3.63982999791580  |
| H | -7.58139999913435 | -0.98772999779902 | 1.88250999768001  |
| H | -0.56222999653055 | -7.67307999657858 | 0.52027000108836  |
| H | -2.73900999916866 | -8.52142999900851 | -0.32036000285009 |
| H | -5.96823999921227 | -4.28470999827416 | 4.14412000211599  |
| H | -2.02133000239905 | 4.79850999965449  | -3.50070999787537 |
| H | -4.44670999867123 | -4.58554999654392 | 0.05819999053651  |
| H | -6.23703000065499 | 0.07337999827901  | 0.14973999851397  |
| H | -5.76228999860420 | 4.84271999865924  | -3.89926999878522 |
| H | -2.57613000336756 | 1.44568999113639  | -4.25899001019178 |
| H | -2.67630979520687 | -0.32323016668961 | -2.60376001477674 |
| H | -4.59045000020101 | 5.85510999753815  | -4.76807999822223 |
| H | -4.24092999892372 | 4.07101000099724  | -6.44361999942510 |
| H | 1.75479996735851  | -5.39902997226874 | -2.84527977469114 |
| H | 3.57260998829948  | -6.91953999861286 | -2.28937998475365 |
| H | 5.88614001550507  | -7.30861999996309 | -1.47566004247570 |
| H | 7.35030000038595  | -5.36348999929369 | -0.91294000396459 |
| H | 6.53259001359136  | -3.06034999912582 | -1.20375003144034 |
| C | 4.84322001478985  | -1.10947999321720 | -1.78279005021583 |
| C | 4.36893999553098  | -0.19738999720253 | -0.85309001628235 |
| C | 5.02715998770378  | 1.01551999484198  | -0.51570000426675 |
| C | 6.24496000268372  | 1.25895000067999  | -1.12898999937611 |
| C | 6.78780000190090  | 0.38107999898558  | -2.09557999252523 |
| C | 8.01576000309362  | 0.67436999708621  | -2.74621999644674 |
| C | 8.49931999773067  | -0.14132999808081 | -3.74512000022107 |
| C | 7.76275000199034  | -1.28032999994321 | -4.14386000022612 |
| C | 6.57636000191764  | -1.60423000262018 | -3.51933999621086 |
| C | 6.06735000494969  | -0.80502999788740 | -2.46268000496946 |
| H | 6.01408000024083  | -2.48043999865612 | -3.83954000065978 |
| H | 8.13314000014730  | -1.90620000141411 | -4.95699000107094 |
| H | 9.43318999979115  | 0.09568000264522  | -4.23744000163067 |
| H | 8.56146000121323  | 1.57172000081928  | -2.44752000236099 |
| H | 6.79534000130959  | 2.16644000302229  | -0.87298000099731 |
| C | 4.39843003631730  | 2.01495001563984  | 0.37810001420366  |
| C | 3.78358987589817  | 1.66779990468303  | 1.59157995997548  |
| C | 3.18859003008044  | 2.63857002432951  | 2.39446001554866  |
| C | 3.16945002177276  | 3.99032000768469  | 2.02519001313439  |
| C | 3.76858999643633  | 4.33097999795425  | 0.80008999699024  |
| C | 4.37343002555527  | 3.37070000516580  | -0.00671999071204 |
| H | 4.81603999326143  | 3.66401999845523  | -0.96134000274417 |
| H | 3.75808999793174  | 5.36763000025030  | 0.45896999610079  |
| C | 2.52660999694083  | 5.07371999889508  | 2.89488999905844  |
| C | 1.92415999997511  | 4.49951000131395  | 4.18461999700240  |
| H | 1.12889000211864  | 3.77332000273749  | 3.96824999978569  |
| H | 1.48180999968809  | 5.31670999832944  | 4.77237000065719  |
| H | 2.68826999793934  | 4.01531999950057  | 4.81062999874919  |
| C | 3.60036999783875  | 6.11633999883012  | 3.26808999798962  |
| H | 4.03366999762930  | 6.59202000050268  | 2.37694999794930  |
| H | 4.41849000262475  | 5.65146999765646  | 3.83745999986384  |
| H | 3.15472000066275  | 6.90726000203309  | 3.88971000023552  |
| C | 1.39860999888741  | 5.75801999720710  | 2.09722999949985  |

|   |                   |                   |                   |
|---|-------------------|-------------------|-------------------|
| H | 1.78180000256774  | 6.22557000107336  | 1.17979000229701  |
| H | 0.93235000011441  | 6.54613999818549  | 2.70753000015877  |
| H | 0.62354999932632  | 5.02841000065285  | 1.82893000137718  |
| H | 2.70194998981156  | 2.31522999697085  | 3.31195999322153  |
| H | 3.75504008737783  | 0.62661010416189  | 1.91117001900659  |
| O | 3.13487000046991  | -0.46195999309916 | -0.21737999862385 |
| O | -1.88954000109652 | -1.10326999786885 | -0.58293999781617 |
| C | -3.13795000050842 | -1.28838999945706 | 0.02787000039045  |
| C | -3.28483999537004 | -2.37624999754621 | 0.87928998908138  |
| C | -4.50319999980367 | -2.50726999524605 | 1.61734000570819  |
| C | -4.68084000188365 | -3.47850999833855 | 2.63580999879426  |
| C | -5.85993999966455 | -3.54590000148727 | 3.34896999913554  |
| C | -6.92161999850014 | -2.65480000001981 | 3.06965000141045  |
| C | -6.77716000258500 | -1.69605000062947 | 2.09030999699624  |
| C | -5.56817000137405 | -1.58425999623513 | 1.35374999894971  |
| C | -5.39177000159996 | -0.57661999855070 | 0.37926999897120  |
| C | -4.18919999642813 | -0.37806000323751 | -0.28381999893434 |
| C | -4.05547001128318 | 0.70639999700770  | -1.28257001080186 |

158

3b\_2 (TS1-1)

|   |                    |                   |                   |
|---|--------------------|-------------------|-------------------|
| C | -4.003909999746516 | -1.39393000034737 | -2.33904000187969 |
| F | 6.86378999980812   | -2.58448000068834 | -0.43339000014811 |
| F | 7.53939999776564   | -3.39770000247093 | 1.47914999935909  |
| F | 8.49614999856374   | -1.61056999981979 | 0.65727000192986  |
| H | 4.60941000053520   | -2.57628999921011 | 0.87884999852091  |
| C | -2.02294000444408  | -6.03531999902275 | 4.99041000305948  |
| C | -6.25479999873253  | -2.04693000243884 | -1.79688999860239 |
| C | 7.30005999933274   | -2.23405000012492 | 0.81056000242174  |
| C | 2.40809992347119   | -0.73060992606646 | -3.40031996287246 |
| F | -6.13345999821167  | 0.93000999903296  | -5.25013000134815 |
| C | -1.40585000314524  | -4.08844999764726 | 6.42482000056887  |
| H | -1.47975999946529  | -6.70111999959457 | 5.67646000233383  |
| C | -4.88080999911668  | -2.27413999995009 | -1.70684999902011 |
| H | -4.48932000132057  | -3.13581000110172 | -1.16656000069403 |
| H | -2.44460000208930  | -3.94403999893786 | 6.75532000284346  |
| C | 4.94378999820950   | -1.73008000067906 | 1.48003000023009  |
| H | -0.89059000105226  | -3.12092000259199 | 6.49546999943252  |
| C | 3.62342000471562   | -0.95936999630793 | -2.72525000604905 |
| C | 1.85375000245670   | -1.70216999923834 | -4.22477000298188 |
| H | 1.88125009309863   | 0.21390990275085  | -3.28267004237347 |
| C | -6.35169999744500  | 1.10661999775065  | -3.91518000259387 |
| F | -7.68210999965134  | 1.32598000048014  | -3.75487000083557 |
| C | 6.29308000055149   | -1.38248000236160 | 1.54252999824760  |
| H | -3.77548999924355  | 0.36401000007466  | -3.55353000058683 |
| C | 4.26686999944230   | 0.06791999967658  | -1.87476000326540 |
| C | 4.25038000951641   | -2.19873000284249 | -2.92941000181195 |
| C | 2.48169000634291   | -2.94065000544915 | -4.44014001012868 |
| H | 0.89257999994353   | -1.48705000462206 | -4.69424999211014 |
| H | -1.17135550627595  | 3.39906832414403  | -2.15176450323463 |
| F | -8.47291000148820  | -2.59752999764442 | -1.10938000111175 |
| H | 0.50306594539001   | 3.32399965706123  | 2.32592328335897  |
| C | 3.51923000670734   | 0.99815999654672  | -1.09713998776897 |
| C | 5.64694999901646   | 0.19579000535818  | -1.83470000682861 |
| C | 3.69720000110231   | -3.15939000143354 | -3.77735000171630 |
| H | 5.17652999942916   | -2.42872999901915 | -2.40067000053505 |
| C | 1.82098000434606   | -3.98249000006033 | -5.34584000539779 |
| C | -1.97639009372792  | 3.58384019080864  | -1.45721006511635 |
| O | 2.12787000596886   | 0.87162000262644  | -1.11043001063994 |

|   |                   |                   |                   |
|---|-------------------|-------------------|-------------------|
| C | 4.08384996340705  | 2.05128996521888  | -0.38811001393096 |
| H | 6.26096000234694  | -0.46879000205992 | -2.44406999315222 |
| C | 6.29437999838519  | 1.15961000850773  | -1.02880001418139 |
| H | 4.22566000043659  | -4.10435000131756 | -3.90119999541486 |
| C | 1.60576999782593  | -3.37026000025534 | -6.74553000116418 |
| C | 0.45649999960318  | -4.37949999813181 | -4.74473000052149 |
| C | 2.67553999962392  | -5.24831000232306 | -5.49851999917546 |
| C | -2.72058994259507 | 2.49514992256859  | -0.92380992535802 |
| C | -2.35520003728448 | 4.85129985871685  | -1.04403992277440 |
| P | 1.34917996222492  | 0.46057998183460  | 0.24368000396250  |
| C | 5.51179000440837  | 2.10443000774321  | -0.28544999578459 |
| C | 3.21600009750611  | 3.10086997100278  | 0.21079013242366  |
| C | 7.71064999761028  | 1.21148999990351  | -0.93754000241606 |
| H | 2.56352000049428  | -3.06864999964486 | -7.19437000163217 |
| H | 1.12970999943256  | -4.10731999756023 | -7.40930999905461 |
| H | 0.95584000109401  | -2.48579999790984 | -6.70457999841634 |
| H | -0.19849000019731 | -3.50932999799485 | -4.60317000094936 |
| H | -0.05727000232187 | -5.08817999996747 | -5.41145999737309 |
| H | 0.58106999753240  | -4.87039000173867 | -3.76895999907115 |
| H | 2.82697000066478  | -5.75976000168220 | -4.53625000233630 |
| H | 2.16454000184055  | -5.95599999813701 | -6.16658999924894 |
| H | 3.66126999835466  | -5.02729999808284 | -5.93423999797333 |
| O | -2.37450001862187 | 1.20710000264051  | -1.33767001795536 |
| C | -3.77314995944335 | 2.62554000061377  | -0.02941995675382 |
| H | -1.83196994465866 | 5.71948003570296  | -1.44956999126963 |
| C | -3.39687997917765 | 5.06336001630211  | -0.11094005010595 |
| O | 2.02469002781132  | 1.39222996460261  | 1.37154011475425  |
| N | -0.12938999440804 | 0.81610000330169  | -0.05477000791323 |
| N | 1.76150998718542  | -1.05275000193935 | 0.70703999494561  |
| C | 6.18380000273263  | 3.02938000877649  | 0.55404998876267  |
| C | 3.35935994769597  | 4.48337993691107  | -0.14625002348079 |
| C | 2.18571999860574  | 2.75397030729043  | 1.06981971306282  |
| H | 8.29611000156477  | 0.49056999714596  | -1.51125999796191 |
| C | 8.33376000220592  | 2.13120000002000  | -0.12208999603330 |
| P | -1.57372999261615 | 0.24778999841465  | -0.30652999510783 |
| C | -4.45638002221729 | 1.41406999908890  | 0.49964996451087  |
| C | -4.11789001592652 | 3.94235000598829  | 0.42238997649335  |
| C | -3.72143000306409 | 6.37258000504416  | 0.33542000313576  |
| S | 2.29907000263957  | -1.48318000004612 | 2.19977000101207  |
| H | 1.47055001235546  | -2.11963000094334 | -0.08185000030498 |
| C | 7.56086000172418  | 3.03925999945009  | 0.63711999869396  |
| H | 5.59701000065835  | 3.72516999804837  | 1.15221000194380  |
| C | 4.30341992794799  | 4.94440998841856  | -1.10060007151695 |
| C | 2.46773020745007  | 5.44097008457943  | 0.44423015107658  |
| C | 1.28289977211898  | 3.67492939802962  | 1.66781015122560  |
| H | 9.42217999753583  | 2.15272999989041  | -0.05157000225870 |
| O | -2.31995999996093 | 0.52586999285753  | 1.10271000228636  |
| N | -1.78639000255938 | -1.25865999906293 | -0.78175000332517 |
| C | -3.71251000550152 | 0.41013001196187  | 1.10770000535746  |
| C | -5.87563000057781 | 1.24212000354255  | 0.41042000338917  |
| C | -5.10352000351107 | 4.18926999937434  | 1.41392000471007  |
| H | -3.17111000249760 | 7.21578999829224  | -0.08759999968588 |
| C | -4.69395000645959 | 6.57774000061028  | 1.28929999785428  |
| O | 2.29107999697346  | -2.93934999923774 | 2.20418000105292  |
| O | 1.62492000059037  | -0.76016000032425 | 3.26643000275603  |
| H | 8.05581999778270  | 3.74571000009034  | 1.30456000416538  |
| H | 4.96774001816810  | 4.22799000849088  | -1.58012997846457 |
| C | 4.38192001730571  | 6.28016000797563  | -1.43759998174177 |

|   |                   |                   |                   |
|---|-------------------|-------------------|-------------------|
| C | 2.58685000465469  | 6.81094997951518  | 0.08738001791858  |
| C | 1.46585999031116  | 5.01005028910271  | 1.34492992606654  |
| H | 7.77094999977835  | -0.03638999781484 | 2.36383000143235  |
| S | -2.23490999812371 | -1.70811999739526 | -2.25539999926988 |
| C | -4.27802998277636 | -0.71729998447614 | 1.76717999244186  |
| C | -6.47621000098845 | 0.11398999466749  | 1.06203999545030  |
| C | -6.70833999702404 | 2.11694999724194  | -0.33344000144239 |
| C | -5.38305000101542 | 5.47229000176938  | 1.83791000439730  |
| H | -5.63992999983333 | 3.34840999691664  | 1.84993999749363  |
| H | -4.92811000127575 | 7.58796000320800  | 1.62782999852750  |
| H | 5.11046001379481  | 6.60639000140278  | -2.18134998788442 |
| C | 3.52308991113686  | 7.22637997511285  | -0.83378009395283 |
| H | 1.90728997528193  | 7.52867999519919  | 0.55177997984390  |
| H | 0.81228999566305  | 5.75777995473667  | 1.79833996116179  |
| H | -2.00252999698898 | -6.49959999931105 | 3.99328999953495  |
| C | 4.02273000037107  | -0.98856999844225 | 2.22004000208160  |
| O | -1.61409999781357 | -0.93409999935678 | -3.32872999818026 |
| O | -2.11086999746751 | -3.16802999818222 | -2.31304999774246 |
| C | -5.66110999799547 | -0.81380000653794 | 1.74994999798884  |
| C | -3.46066004040722 | -1.72404000672501 | 2.48251005314218  |
| C | -7.88411000003543 | -0.05688999940344 | 0.98959999979154  |
| C | -8.07057999868092 | 1.90945000277974  | -0.40339000085610 |
| H | -6.25611999924342 | 2.95038000005573  | -0.86923000079151 |
| H | -6.14033999737881 | 5.63291999746908  | 2.60681000033360  |
| H | 3.59821003559981  | 8.28041000943100  | -1.10446995718026 |
| H | -3.06826999882031 | -5.98747999993096 | 5.32867000207689  |
| C | 0.10996000049046  | -4.81721000044912 | 4.55724999751371  |
| H | 0.64956999756843  | -5.43953999742828 | 5.28720999921814  |
| H | 3.68349000157443  | 0.63296999929509  | 3.58965000201824  |
| H | -6.14426999961507 | -1.63621000082668 | 2.27916000508958  |
| C | -2.30038009362835 | -1.38535022808244 | 3.20475000060357  |
| C | -3.87696998593129 | -3.06367997843932 | 2.52458998804067  |
| H | -8.33051000229118 | -0.91681000102761 | 1.49252000082418  |
| C | -8.66787999920079 | 0.82162999895292  | 0.27332000244107  |
| H | -8.68886999826642 | 2.58382000048539  | -0.99729000191416 |
| F | 5.43917000223774  | 2.65594000128646  | 3.78957000176398  |
| H | 0.16900000099895  | -5.31849000298715 | 3.58070999869869  |
| H | -0.91498000145626 | -4.78612999969895 | 7.12010000276513  |
| H | 0.63240999667787  | -3.85485999801229 | 4.47593999922049  |
| C | -1.62777003372147 | -2.33689001352801 | 3.96356003911213  |
| H | -1.92425979970650 | -0.36430966567484 | 3.19272993077215  |
| C | -3.20461997789057 | -4.00820000099377 | 3.30097997140507  |
| H | -4.74490998953283 | -3.37567000168215 | 1.94064999312608  |
| H | -9.74660000169724 | 0.67027000187088  | 0.21374999870489  |
| C | 6.20747999904975  | 1.54511999794779  | 3.96761999807383  |
| F | -7.22610000207969 | -4.20689000232351 | -1.90949999874492 |
| C | -2.07554998564237 | -3.66526998074762 | 4.05711998272179  |
| H | -0.73252998532843 | -2.02173998422212 | 4.50258000769731  |
| H | -3.58359001392139 | -5.03002000009359 | 3.31527001494786  |
| F | 6.08145000152816  | 1.19190000048599  | 5.27919000057885  |
| C | 5.77966999762390  | 0.41818999894603  | 3.06059000097400  |
| F | 7.50076000195619  | 1.90810000204546  | 3.77548999928557  |
| H | -7.82208999740651 | -0.76305000189472 | -2.54852999788277 |
| F | -6.81770999950120 | -3.40299000203011 | 0.08056000191600  |
| F | -5.70509000037739 | 2.25569999989111  | -3.56657000118129 |
| C | -1.36057998533424 | -4.65086999775546 | 4.98782998005855  |
| C | 6.71803000025968  | -0.30823000198421 | 2.32911999839288  |
| C | 4.42436000117555  | 0.08126999802484  | 3.01262999857574  |

|      |                   |                   |                   |
|------|-------------------|-------------------|-------------------|
| C    | -5.85689999796567 | -0.07366000155701 | -3.11862999837043 |
| C    | -4.47965999832441 | -0.29798999974960 | -3.05210999962553 |
| C    | -7.19638999860712 | -3.05216000160595 | -1.18458999968444 |
| C    | -6.75082000029010 | -0.94445000147304 | -2.49639999966639 |
| 158  |                   |                   |                   |
| 3b_2 | (TS1-1')          |                   |                   |
| C    | -3.90652000175618 | 1.38616000101102  | -3.18522000205713 |
| C    | -6.25928000229378 | 0.19539000036243  | -2.27747000087781 |
| F    | -4.03006999970638 | 4.24575999991357  | -3.12713999836285 |
| H    | -5.07235000254065 | -1.59459000224319 | -2.00435999798327 |
| H    | -6.82006000163494 | -6.87530000076802 | 2.56350999915987  |
| C    | -4.79483000064584 | -5.59785000064402 | 3.93204999745498  |
| H    | 5.08231999739615  | -3.22116999955159 | -0.34347000256289 |
| C    | -5.08236999927680 | -0.55159000104286 | -2.31888000136166 |
| C    | 4.08321998878670  | -1.92355999137354 | -3.26974999692563 |
| C    | -4.35302000234566 | -6.27206000235856 | 1.57077000037064  |
| C    | -5.07880000053279 | 3.54261000037828  | -3.64020999996234 |
| C    | 5.40083999828935  | -2.62742000053541 | 0.51319999906458  |
| F    | 7.34327999788461  | -2.58014999773156 | -1.59612000170654 |
| C    | 7.75920000104610  | -2.76097999944047 | -0.30767000001652 |
| F    | 8.95648999949682  | -2.13490999975237 | -0.18149999815917 |
| C    | -3.90969000094343 | 0.06064999993752  | -2.76297999847459 |
| F    | 7.98870000211352  | -4.09664000042145 | -0.16180000074798 |
| C    | 3.48302999638045  | -0.76144998161104 | -2.75979999008561 |
| C    | 3.47794999987969  | -2.66679999657320 | -4.28399999986669 |
| H    | 5.03823999965493  | -2.25956999969625 | -2.86222000479749 |
| C    | 6.73910000054002  | -2.27073999936749 | 0.68870000090794  |
| C    | -6.70089999954074 | -5.81293999845176 | 2.30131000042905  |
| F    | -8.40663000042321 | 0.42340999859049  | -1.27140999809442 |
| F    | -6.21404000251730 | 4.21741999908996  | -3.33116000093332 |
| C    | 4.19491000107824  | 0.04851000338938  | -1.74698999526739 |
| C    | 2.23232008267435  | -0.39329017150526 | -3.28750008423358 |
| C    | 2.24661999899357  | -2.28414998925111 | -4.83324999256767 |
| H    | 3.98699000222689  | -3.55980000076825 | -4.64607000232659 |
| H    | 0.47568937832622  | 3.35665745967665  | -1.44333825706061 |
| H    | 8.18478000189905  | -1.25841999924867 | 1.93380000117911  |
| C    | -5.09429000166881 | 2.12021999795901  | -3.14039999951144 |
| C    | 3.52788000059605  | 0.71427000564481  | -0.68197000937747 |
| C    | 5.57281000335063  | 0.18945999732197  | -1.79557999939134 |
| C    | 1.63722000058433  | -1.13703998911834 | -4.29920999077991 |
| H    | 1.72657988512914  | 0.50055023976013  | -2.93365988273830 |
| C    | 1.56144999874874  | -3.04417999681911 | -5.97197999926820 |
| C    | -0.19587979710135 | 3.64597949853738  | -0.64962021277913 |
| O    | 2.13007000812685  | 0.62617999899299  | -0.63817999388219 |
| C    | 4.16705995941975  | 1.45026999580677  | 0.30792996286801  |
| H    | 6.12395000121329  | -0.25828999687829 | -2.62352000331548 |
| C    | 6.29849000358513  | 0.87567999321483  | -0.79579999635214 |
| H    | 0.66401999524352  | -0.80757999537011 | -4.66437000431782 |
| C    | 2.38396999946509  | -4.24942000095379 | -6.44640000009552 |
| C    | 1.36609999935777  | -2.08457999757754 | -7.16469999888810 |
| C    | 0.18449999931496  | -3.54756999936606 | -5.49516999998585 |
| C    | -1.31615007761488 | 2.82643025695016  | -0.32581971386982 |
| C    | -0.00144014736055 | 4.76508030652956  | 0.14459008089840  |
| P    | 1.50029999629262  | -0.35086002160890 | 0.48107002582271  |
| C    | 5.60014999737592  | 1.48906000341296  | 0.29724999944918  |
| C    | 3.36525013128410  | 2.16518006901696  | 1.33683006998669  |
| C    | 7.71678999873774  | 0.93778999818147  | -0.83341000093833 |
| H    | 2.53340000116242  | -4.98322999910828 | -5.64041999999774 |



|   |                   |                   |                   |
|---|-------------------|-------------------|-------------------|
| H | 1.85369999761641  | -4.75767999894689 | -7.26451999797873 |
| H | 3.37130999866538  | -3.94669999875582 | -6.82495000156960 |
| H | 0.87952000023724  | -2.61169999797438 | -7.99917000098723 |
| H | 0.73482999754657  | -1.22787000144668 | -6.89262000242396 |
| H | 2.33290000117167  | -1.69693000126361 | -7.51770000201806 |
| H | 0.30356000253093  | -4.27188000201066 | -4.67592999959844 |
| H | -0.45484999853280 | -2.73153000188881 | -5.13234000218393 |
| H | -0.34198999986007 | -4.05324000284034 | -6.31883000174335 |
| O | -1.47088998322398 | 1.62715996475256  | -1.03258012307929 |
| C | -2.28753003807026 | 3.16926997672220  | 0.60167984686511  |
| H | 0.83562002976676  | 5.43146993503438  | -0.07040999729434 |
| C | -0.86288009110690 | 5.08933012097409  | 1.21802987816098  |
| O | 2.23271003555509  | 0.11341009518095  | 1.83954991085921  |
| N | -0.03200000130246 | -0.10731998929340 | 0.49277000156151  |
| N | 2.03608999014368  | -1.87564000654343 | 0.24308000374698  |
| C | 6.36228999873271  | 2.07526000079560  | 1.34021000170700  |
| C | 3.51361000344428  | 3.57588000151464  | 1.55943999706623  |
| C | 2.39355986454524  | 1.49062978189072  | 2.06565015222322  |
| H | 8.23546000142731  | 0.47306999992905  | -1.67405999983607 |
| C | 8.42629999876770  | 1.54030999854626  | 0.182739999832992 |
| P | -1.38527999540977 | 0.21389998763606  | -0.24379999398237 |
| C | -3.56438997932627 | 2.41321997683092  | 0.69319003247645  |
| C | -2.03848991245320 | 4.30094990246409  | 1.44731008374274  |
| C | -0.59653995132637 | 6.19774993955983  | 2.06473004451023  |
| S | 2.78232000027558  | -2.84892000113618 | 1.35202999661252  |
| H | 1.32232000002801  | -2.60768999834058 | -0.64105000382194 |
| C | 7.74077000292329  | 2.09929999820802  | 1.28491999840500  |
| H | 5.84664999988832  | 2.49751000176729  | 2.20116000131796  |
| C | 4.37658999666516  | 4.39742999476781  | 0.78573000597126  |
| C | 2.71270002756897  | 4.20204001613478  | 2.57137988329565  |
| C | 1.54784019406119  | 2.09509011499453  | 3.03545990634493  |
| H | 9.51623000117342  | 1.57034000257313  | 0.14768000182295  |
| O | -2.37639999634388 | 0.36348999940930  | 1.03169001326845  |
| N | -1.89255000551230 | -0.91140999830711 | -1.24305999602893 |
| C | -3.59185000129609 | 1.04368000472600  | 0.92564999892022  |
| C | -4.81134999902790 | 3.10789000677620  | 0.53388001062280  |
| C | -2.87588998039438 | 4.63825998489114  | 2.54261002260914  |
| H | 0.29611000607733  | 6.79473999618931  | 1.86909000253231  |
| C | -1.43085997546603 | 6.50046996795925  | 3.11890002632621  |
| O | 2.85941999966931  | -4.15070999876582 | 0.70470999786590  |
| O | 2.20164000176912  | -2.71711999884251 | 2.67825000115115  |
| H | 8.30517999839045  | 2.54144000303415  | 2.10681000149220  |
| H | 4.95913998683749  | 3.94860000126984  | -0.01712000946748 |
| C | 4.47648000793377  | 5.75227999868802  | 1.02626000855805  |
| C | 2.86109002759692  | 5.59409999451435  | 2.81325004772276  |
| C | 1.75867964978147  | 3.44213995855283  | 3.28378004040211  |
| H | 0.80116041099009  | 1.50675501096177  | 3.54619517238450  |
| S | -2.36599999793069 | -0.85883999723792 | -2.76903999895192 |
| C | -4.79429999725154 | 0.32097000186168  | 1.19003999998969  |
| C | -6.03216999812731 | 2.40101999774106  | 0.78378999968881  |
| C | -4.89193000257231 | 4.45439999886537  | 0.09310999803138  |
| C | -2.57434002204685 | 5.70547002506244  | 3.36354998100945  |
| H | -3.75588001383383 | 4.02842001591020  | 2.74362998286295  |
| H | -1.21062001858394 | 7.34926002368903  | 3.76812998007273  |
| H | 5.14048999909665  | 6.36127999905905  | 0.41116000221823  |
| C | 3.72570000122444  | 6.35731000021155  | 2.06018999883635  |
| H | 2.25711000335941  | 6.04812000461583  | 3.60121000508524  |
| H | 1.14972012413596  | 3.94342998943093  | 4.03791000263319  |

|               |                   |                   |                   |
|---------------|-------------------|-------------------|-------------------|
| H             | 4.10501999780524  | -1.25498999959501 | 3.35019999791135  |
| H             | -5.41358999929602 | -5.01659000203082 | 4.62986000084524  |
| O             | -1.45409999877014 | -0.12194999901179 | -3.63945000135092 |
| O             | -2.70739999651056 | -2.23646000039643 | -3.14521999963729 |
| C             | -5.98048000026735 | 1.03599000097897  | 1.14254000104708  |
| C             | -4.84004999768227 | -1.12203999925346 | 1.52262999868088  |
| C             | -7.27250000053152 | 3.07392000072332  | 0.62583000039870  |
| C             | -6.11285000126399 | 5.07650000023605  | -0.06595000166721 |
| H             | -3.97601999841635 | 4.99293000236633  | -0.14453000019253 |
| H             | -3.22307999807043 | 5.93597999811774  | 4.20981000741828  |
| H             | 3.82545998863555  | 7.42685000402815  | 2.25085998970627  |
| H             | -3.28731000141904 | -6.02001999962379 | 1.66762999855959  |
| C             | 4.46954999838731  | -2.24695000131471 | 1.47792000139940  |
| H             | -3.74749000019977 | -5.29552000174346 | 4.07263999892190  |
| H             | -4.88678000172791 | -6.66056000076918 | 4.20320000205858  |
| H             | -6.91792000205319 | 0.50730999719753  | 1.32329999789797  |
| C             | -5.66540000037268 | -1.57104000250477 | 2.56929000070640  |
| C             | -4.15701999812615 | -2.09055000039491 | 0.77818999993246  |
| H             | -8.19273000049699 | 2.51891999841216  | 0.81793000179451  |
| C             | -7.31501000167212 | 4.38749000261068  | 0.21215000078918  |
| H             | -6.14995999754226 | 6.10532000015429  | -0.42639999781681 |
| F             | 6.55660000017035  | -1.24716000250712 | 5.09594999883477  |
| H             | -7.36840000255069 | -5.22688999887785 | 2.94872000232477  |
| H             | -4.62904999988340 | -6.18226000067983 | 0.51042999972356  |
| H             | -4.47955999975503 | -7.32461000117395 | 1.86413000104158  |
| C             | -5.78232000070196 | -2.92722999953565 | 2.85674000205170  |
| H             | -6.20283000262014 | -0.84316999774361 | 3.18029000146940  |
| C             | -4.28967999889236 | -3.44937999909766 | 1.06069999967685  |
| H             | -3.51264000145063 | -1.79052000154414 | -0.04495000028850 |
| H             | -8.27339000047715 | 4.89252999886285  | 0.08353999905032  |
| C             | 6.59883999919074  | -0.42512999936044 | 4.00832999770614  |
| H             | -7.03166000166079 | -5.67497000093234 | 1.26183000129651  |
| C             | -5.09410000080293 | -3.90112999853493 | 2.11275000016068  |
| H             | -6.41834999915121 | -3.22961000028583 | 3.69091999885219  |
| H             | -3.73735000180568 | -4.15380999880264 | 0.43924000158544  |
| F             | 7.86018999968903  | 0.07195999866727  | 3.93518000120008  |
| C             | 6.19108999983721  | -1.16013000015997 | 2.75599000117806  |
| F             | 5.76353999897075  | 0.61724000031815  | 4.27739000134174  |
| F             | -8.20007000054344 | -1.01836000220681 | -2.90388999835779 |
| H             | -7.19068999792437 | 2.11568000161272  | -2.62885000145609 |
| F             | -4.94538000098139 | 3.58475000073822  | -4.99834999923757 |
| C             | -5.22899999777067 | -5.38436999803985 | 2.46720999742924  |
| C             | 7.14099000263807  | -1.53709999980180 | 1.80670000204657  |
| C             | 4.85019999750588  | -1.51757000038486 | 2.60100999925520  |
| C             | -6.27224000199381 | 1.53382000064753  | -2.68162999867398 |
| F             | -7.33308000099669 | -1.45878000016268 | -0.94457999913306 |
| H             | -2.98168000056002 | 1.83159000011360  | -3.54799000228947 |
| C             | -7.54418000261860 | -0.46458000141888 | -1.84292999786460 |
| 158           |                   |                   |                   |
| 3b_2 (TS1-2') |                   |                   |                   |
| C             | 6.06019999894810  | 2.87505000115963  | 2.55422999155941  |
| F             | 6.02401000006571  | 2.99092000190782  | 1.19201000240159  |
| H             | -6.32252000196920 | 0.30772000216465  | 5.93471999921449  |
| C             | -3.63898000169679 | -1.93033000088456 | -3.34545999914363 |
| F             | 6.45429000271960  | 4.08248999642201  | 3.03888000083302  |
| H             | -4.61538999933990 | 2.78572000223638  | 5.31525999968578  |
| H             | 5.05008999725560  | 0.34114999997391  | 2.69754999435163  |
| H             | -2.72239000010899 | -2.41825999967756 | -3.67279999752652 |

|   |                   |                   |                   |
|---|-------------------|-------------------|-------------------|
| C | 1.60212996768540  | -4.26885984608892 | -0.07600010174136 |
| H | -6.15145999800704 | -0.54849999763496 | 4.38650000188790  |
| H | -5.95190000186085 | 3.78803000155010  | 4.70552999738393  |
| F | 7.03782000080104  | 1.97916000053447  | 2.84580999842301  |
| H | -8.19398000167603 | 1.65758000262129  | 4.97712000229865  |
| C | 4.36626000967158  | 1.10085999811010  | 3.07617002229445  |
| C | -5.18576000205224 | -1.39121999877934 | -1.55406000244102 |
| C | -4.00434000169836 | -1.98215999764148 | -2.00340999795396 |
| C | -4.45383999772291 | -1.24380999863505 | -4.24815999845827 |
| C | 2.70252000875507  | -4.14102003419911 | 0.78670001430380  |
| C | 0.53256000254646  | -5.10449002989307 | 0.24002001098616  |
| H | 1.57604002181541  | -3.72214016435141 | -1.01546985540441 |
| H | -7.94922000090145 | 2.66372000134813  | 3.52798000213978  |
| H | -4.73419999829314 | 0.22090999986846  | 5.13442000183281  |
| H | 1.23228999954181  | 1.34286000237421  | 4.41832999592355  |
| H | -6.20611000158532 | 2.74406000261947  | 6.11894000005908  |
| C | 3.85529999328486  | -3.25812999513241 | 0.50524000473740  |
| C | 2.67925000832003  | -4.87875001487269 | 1.98252999789448  |
| C | 0.51044000363022  | -5.85471001709926 | 1.42542999641131  |
| H | -0.30363000153470 | -5.14351998789789 | -0.45731999785782 |
| H | 1.48207752872803  | -1.16102578803036 | -3.47970983095009 |
| H | -8.00479000023399 | 0.89365000021942  | 3.37620999968918  |
| C | 3.10375000403583  | 0.72735999817779  | 3.53298000960570  |
| C | 3.69308999797595  | -1.95345000022088 | -0.03118998999781 |
| C | 5.14636999875566  | -3.62618999987976 | 0.84130000066074  |
| C | 1.61191999990123  | -5.71942999800690 | 2.28694999926069  |
| H | 3.48954999828332  | -4.75380999442494 | 2.70228999875841  |
| C | -0.63012000057907 | -6.82734999939191 | 1.74463000407919  |
| C | 1.14041990224555  | -0.14310977917984 | -3.58692053395116 |
| O | 2.39432999815312  | -1.56215000084551 | -0.39035999891484 |
| C | 4.71214998531532  | -1.02994001628306 | -0.19509003154313 |
| H | 5.32995000071917  | -4.63145999930555 | 1.22499000231273  |
| C | 6.23094999933409  | -2.72164999893887 | 0.76692999534534  |
| H | 1.63990000000073  | -6.26806999708892 | 3.22904000221868  |
| C | -0.94767000307476 | -6.83759999737733 | 3.25176999981889  |
| C | -0.17751999861776 | -8.24200999743865 | 1.32223999867641  |
| C | -1.91752999864082 | -6.46887000165721 | 0.98501000036283  |
| C | -0.12970995900237 | 0.24903982436754  | -3.07198968967710 |
| C | 1.89623016247622  | 0.86082992305976  | -4.17627944319277 |
| P | 1.65707998579537  | -0.56989998720377 | 0.63554998952047  |
| C | 6.01843999473999  | -1.38760999643137 | 0.28181000812665  |
| C | 4.44576002078157  | 0.29102000377876  | -0.82132002423273 |
| C | 7.52503000036276  | -3.09441000211488 | 1.21731000023185  |
| H | -0.10650999939178 | -7.20514999713243 | 3.85496000119954  |
| H | -1.20709000113877 | -5.83038999801038 | 3.60925000093349  |
| H | -1.80524999779231 | -7.49798000139412 | 3.44677000159600  |
| H | 0.04112000069372  | -8.27428000246814 | 0.24517000189752  |
| H | 0.73147999890137  | -8.54368999794411 | 1.86260000119511  |
| H | -0.96822000113627 | -8.97764000024616 | 1.53631000188665  |
| H | -2.24874000231390 | -5.44161999712557 | 1.19210999912106  |
| H | -1.79848000122770 | -6.56055000060764 | -0.10276999759084 |
| H | -2.72419999749640 | -7.15357000015554 | 1.28507999973149  |
| O | -0.88408998228650 | -0.70436991868963 | -2.36141000521720 |
| C | -0.67990001609329 | 1.51096004166054  | -3.23582014187860 |
| H | 2.86616996013717  | 0.61103000294582  | -4.60904013633161 |
| C | 1.46303999326181  | 2.20431000413156  | -4.23728000616195 |
| O | 2.62033004869726  | 0.72451996936533  | 0.69832999068932  |
| N | 0.25153999633953  | -0.27336000126743 | 0.05356999934679  |

|   |                   |                   |                   |
|---|-------------------|-------------------|-------------------|
| N | 1.56952999431754  | -1.07840999539501 | 2.17240999931150  |
| C | 7.09579000004543  | -0.46666000183763 | 0.34442999480289  |
| C | 5.23803995944986  | 0.74008997889550  | -1.93346004263675 |
| C | 3.43599002102345  | 1.13158009028643  | -0.36493982977144 |
| H | 7.67661999760789  | -4.11592000040935 | 1.57216000114142  |
| C | 8.55843999749726  | -2.18339999920183 | 1.23905000380785  |
| P | -1.07005001085297 | -0.46158000689697 | -0.77126002026846 |
| C | -2.09489000285644 | 1.78542999003549  | -2.87338999950912 |
| C | 0.15452995923377  | 2.54927000032799  | -3.76622007247137 |
| C | 2.30302994973662  | 3.22458998924921  | -4.75723012245745 |
| S | 2.63693999710375  | -1.00262000188536 | 3.43171999649488  |
| H | 0.41644000055126  | -1.73469000233306 | 2.51310000184873  |
| C | 8.33318999898990  | -0.85390999787328 | 0.81673000397095  |
| H | 6.93528999950959  | 0.56361000331079  | 0.03037000109901  |
| C | 6.14672999985364  | -0.11036999729471 | -2.61729999736382 |
| C | 5.07403004256932  | 2.08031998774768  | -2.41291997986196 |
| C | 3.25253984424538  | 2.46694987050156  | -0.82617032005105 |
| H | 9.54398999768834  | -2.47935000023194 | 1.60123000013557  |
| O | -1.69606999905599 | 1.03548999111469  | -0.63842000272938 |
| N | -2.07137999584595 | -1.53579000467954 | -0.18674999786559 |
| C | -2.56671999917612 | 1.57135000257748  | -1.58575999508682 |
| C | -3.00095999936886 | 2.30276000181140  | -3.85850000019042 |
| C | -0.23468998405506 | 3.91317999831593  | -3.78198996309158 |
| H | 3.29186000137684  | 2.94396000052014  | -5.12548999324707 |
| C | 1.89159001197772  | 4.53925000370515  | -4.76921997765920 |
| O | 3.86045999994826  | -1.73784999846520 | 3.16024000122531  |
| O | 1.83602999861363  | -1.33215000056508 | 4.60200000079420  |
| H | 9.14123000154975  | -0.12309000029690 | 0.87166999991331  |
| H | 6.25755000901131  | -1.14208999637146 | -2.28634999470003 |
| C | 6.87300000097420  | 0.34579000068361  | -3.69801999946611 |
| C | 5.85463995906460  | 2.52716998212009  | -3.51195004470686 |
| C | 4.10729012353229  | 2.91918013467265  | -1.81502976426354 |
| H | 2.46852891685362  | 3.07748464941809  | -0.40416759329426 |
| S | -2.88109999672931 | -2.75305999994801 | -0.83217999676080 |
| C | -3.84554999929749 | 2.01295999695878  | -1.13628000007406 |
| C | -4.31055000275726 | 2.71096999918323  | -3.44319000213835 |
| C | -2.67154000252510 | 2.39074999611990  | -5.23568999893712 |
| C | 0.61768999664949  | 4.88526999735629  | -4.26192000659711 |
| H | -1.21027998648182 | 4.19184999579497  | -3.38628997653561 |
| H | 2.54996000697925  | 5.31728999934404  | -5.15902998134721 |
| H | 7.55444999917699  | -0.33170000049060 | -4.21452000191709 |
| C | 6.73898999598992  | 1.68049999964915  | -4.14395000194455 |
| H | 5.72657000057831  | 3.55631999732389  | -3.85420999931873 |
| H | 3.97709996887199  | 3.93243996221375  | -2.19815005225821 |
| C | 4.72188000215060  | 2.44968000561721  | 3.10455000497089  |
| H | -5.46450000051504 | -1.45338000080197 | -0.50292000144839 |
| O | -2.04021999861344 | -3.66406000076103 | -1.60098000215947 |
| O | -3.70741999865714 | -3.31200000180614 | 0.24529999933034  |
| C | -4.67609999778369 | 2.59114999790790  | -2.08377999833265 |
| C | -4.30456000227845 | 1.91858000170086  | 0.26873999912909  |
| C | -5.22395999744742 | 3.20724999847925  | -4.41041000085143 |
| C | -3.58403000198462 | 2.87013000118496  | -6.15233999829996 |
| H | -1.69207000018207 | 2.05302000151786  | -5.57091000175720 |
| H | 0.30695000041731  | 5.93097000010748  | -4.24618000653324 |
| H | 7.32714000925451  | 2.03224000572564  | -4.99270999095945 |
| C | -5.81417000209512 | 0.32660999861870  | 4.95941999836013  |
| H | 4.11850004924153  | 4.45571003140977  | 3.62677011445411  |
| H | -6.24343999810000 | -0.06932999849012 | -4.51897000135578 |

|   |                   |                   |                   |
|---|-------------------|-------------------|-------------------|
| C | -5.98874999766694 | -0.70931999933503 | -2.46873000076256 |
| H | -5.67264000118754 | 2.91600999990967  | -1.78023999823863 |
| C | -4.17641999977638 | 0.75688000252805  | 1.04052999784615  |
| C | -4.97855999866360 | 3.01027000120229  | 0.84630999790447  |
| H | -6.21966000163606 | 3.50848000296362  | -4.07860000002317 |
| C | -4.86932000038130 | 3.28845999980693  | -5.73939999825225 |
| H | -3.31560000015395 | 2.91124000010562  | -7.20879000160679 |
| F | 2.27609000243528  | 5.17061999758683  | 5.02261000489050  |
| C | -5.70016000025607 | 2.81259000157935  | 5.14402999752077  |
| C | -7.66298000016105 | 1.72068999926774  | 4.01486999825369  |
| F | -2.73639999857570 | -0.89841999851699 | -5.85317000250621 |
| C | -4.74098999792324 | 0.66816999960029  | 2.31311000127739  |
| H | -3.64413999801489 | -0.10630000103767 | 0.64591999759638  |
| C | -5.53092000040279 | 2.91962999886180  | 2.11955999780642  |
| H | -5.06285999753568 | 3.94467000078059  | 0.28761999981316  |
| H | -5.58127000056442 | 3.66349999847752  | -6.47598000077605 |
| C | 1.63445999856043  | 4.03715000100424  | 4.63116999343474  |
| F | -4.77460000050731 | -0.32185000198377 | -6.42296000044569 |
| C | -5.44405000032057 | 1.73914000072466  | 2.87736000069409  |
| H | -4.61832000079544 | -0.26825000251905 | 2.85699999748830  |
| H | -6.04998000253844 | 3.79020999983489  | 2.52479999832277  |
| F | 0.71092000158706  | 4.41117000056601  | 3.69886000142376  |
| C | 2.58796000416522  | 3.00461000544481  | 4.08443000216600  |
| F | 0.94526999599140  | 3.57103999712819  | 5.70631000215282  |
| F | -8.31941999837395 | -0.98159000223118 | -2.11017999825931 |
| C | -4.05310999967204 | -1.21521999872262 | -5.70148000105225 |
| F | -4.22781999812368 | -2.43679000215244 | -6.28512000061254 |
| C | -6.13794999812640 | 1.64381999811898  | 4.23942999787709  |
| C | 3.83356995944869  | 3.40565998449536  | 3.59830990164858  |
| C | 2.20700001192853  | 1.66123999644485  | 4.04827002435791  |
| F | -7.63071999762145 | 0.99170000150441  | -2.75781000026090 |
| C | -7.28704000165039 | -0.09462000180268 | -2.00844999803245 |
| F | -7.23540000033178 | 0.30692999878454  | -0.71417999982150 |
| C | -5.62474999907293 | -0.62386999836495 | -3.81563000085972 |

142

3b\_3 (cat)

|   |                    |                   |                   |
|---|--------------------|-------------------|-------------------|
| H | 0.83586000238212   | -5.83991000206209 | 1.29773999851010  |
| H | -5.37322999755856  | 2.05755999781377  | -0.22900999891625 |
| C | -3.83478999946120  | 3.87792000035870  | -4.30792000182628 |
| C | -2.36741999793564  | 4.33714999905846  | -4.43634000166718 |
| H | -5.28610999796971  | 3.82625000002599  | -1.90383999849177 |
| C | -4.77976999831995  | 1.89882999740375  | -1.13001000077668 |
| H | 1.17062999763714   | -3.39937000143240 | 1.78822000294882  |
| C | -3.26420000176072  | 0.57658999918237  | -2.43855999927845 |
| C | -4.72109999950110  | 2.91275000178443  | -2.08504000088907 |
| C | -3.93565000049872  | 2.78637000118879  | -3.23810999918243 |
| C | -3.21494999771065  | 1.59119000155829  | -3.38689999836841 |
| C | 0.21410999840857   | -3.80057999947133 | 1.49077999189209  |
| C | 0.00385999809966   | -5.13986000220092 | 1.19958000339127  |
| C | -1.25097999986604  | -5.63645000156822 | 0.77498000093158  |
| C | -1.41871999939660  | -7.00242999884724 | 0.42255000051203  |
| C | -2.62642999997451  | -7.47151000154142 | -0.04642000188851 |
| C | -3.72117000105195  | -6.58703999816880 | -0.18108000120518 |
| C | -3.59717000104520  | -5.25799999892351 | 0.16882999789113  |
| C | -2.37045999994433  | -4.74485000253410 | 0.66550000035732  |
| C | -2.18320000728067  | -3.36683000114652 | 1.00670000769152  |
| C | -0.917579998732923 | -2.94597000215749 | 1.37970999722010  |
| O | -0.75090007905516  | -1.58188001594331 | 1.64663000844926  |

|   |                   |                   |                   |
|---|-------------------|-------------------|-------------------|
| P | -0.68401969035867 | -0.59112993211060 | 0.36667994855252  |
| N | -0.93474039684167 | 0.90380993229863  | 0.82917004497678  |
| S | -0.65495956696570 | 1.46619991523555  | 2.31422002761849  |
| O | -0.73287003761643 | 2.92171007096277  | 2.24803999065169  |
| O | 0.51071982495103  | 0.85800001476232  | 2.95700999097739  |
| H | 0.62355001090274  | 5.02841001419696  | 1.82892999956492  |
| H | 3.75503999908567  | 0.62660999869675  | 1.91117000244686  |
| C | -4.68084000171046 | -3.47850999810856 | 2.63580999935998  |
| C | -6.92161999831353 | -2.65479999976468 | 3.06965000160416  |
| C | -5.85993999927609 | -3.54590000085607 | 3.34896999966194  |
| O | 3.13487000117738  | -0.46195999614629 | -0.21738000095583 |
| H | 2.70195000136234  | 2.31523000150746  | 3.31196000192436  |
| C | -4.05546999777297 | 0.70639999961591  | -1.28257000091684 |
| O | -1.88954001954769 | -1.10327000677584 | -0.58294000690144 |
| C | -4.18919999966334 | -0.37805999876371 | -0.28381999707350 |
| C | -5.56817000142246 | -1.58425999762478 | 1.35374999791119  |
| C | -5.39177000192639 | -0.57661999829774 | 0.37926999944331  |
| C | -4.50320000218054 | -2.50726999865866 | 1.61734000175667  |
| C | -3.13795000064378 | -1.28838998703659 | 0.02786999335511  |
| C | -6.77716000206116 | -1.69605000022565 | 2.09030999749346  |
| C | -3.28483999851892 | -2.37625000347127 | 0.87928999943954  |
| H | 0.93234999658988  | 6.54613999452933  | 2.70753000104488  |
| N | 0.59803995910659  | -0.97146001592974 | -0.49359998774524 |
| P | 1.81168001112678  | -0.24307999905507 | -1.10149998606720 |
| N | 1.75215999733785  | 1.41528999959843  | -1.30400000292593 |
| S | 0.95366999796456  | 2.16173999889022  | -2.59887999756060 |
| O | -0.13264999895458 | 1.26476999931535  | -2.93608000198545 |
| O | 1.94282999838032  | 2.56891999976669  | -3.57842999993912 |
| C | 0.33269000294931  | 3.65563999752871  | -1.83731999731744 |
| C | -0.82239000166870 | 3.63977000122885  | -1.04691000047928 |
| C | -1.28556000086220 | 4.85708000474989  | -0.54988999961057 |
| C | -0.61207000846867 | 6.05266000336399  | -0.82378001670856 |
| C | 0.53838999724137  | 6.03751000004927  | -1.60443000193725 |
| C | 1.01762000172091  | 4.83292000150888  | -2.12357000100446 |
| H | 1.90292999939696  | 4.80440000108376  | -2.75767000066516 |
| C | 1.30150000064544  | 7.30409999700895  | -1.89816999898764 |
| F | 0.69568999835612  | 8.40450999997099  | -1.39012999889035 |
| F | 2.56096000087654  | 7.25491000199014  | -1.36740000159221 |
| F | 1.45234999969302  | 7.49898999926055  | -3.23601999726832 |
| H | -0.98632999990685 | 6.99271999960161  | -0.42033999810359 |
| C | -2.54069999023745 | 4.95645992740258  | 0.28421006192643  |
| F | -2.30560999918462 | 5.58443001092159  | 1.46546999086124  |
| F | -3.09592000584577 | 3.75818006749294  | 0.55029994716211  |
| F | -3.48715000901547 | 5.70547000533321  | -0.36817000358548 |
| H | -1.33501000472988 | 2.70473000302176  | -0.81918000031610 |
| H | 2.56957999995624  | 1.93409000131549  | -0.94894000069978 |
| O | 2.20455000018593  | -0.86058000290688 | -2.53797999748221 |
| C | 2.71400999685499  | -2.18009000105700 | -2.46265999954382 |
| C | 4.04334000204213  | -2.32257000141203 | -2.08783999941063 |
| C | 4.57381000066574  | -3.64340000193340 | -1.93365000064023 |
| C | 5.88490000233636  | -3.89940999794120 | -1.45339999839513 |
| C | 6.34146000041113  | -5.19102999842868 | -1.29079000189226 |
| C | 5.51136000240757  | -6.29221999769132 | -1.60361000229024 |
| C | 4.22883999778178  | -6.07785999983445 | -2.05821000199808 |
| C | 3.72150000134214  | -4.76054000021224 | -2.22047000076027 |
| C | 2.38508000135847  | -4.53627000018251 | -2.62187000084605 |
| C | 1.83752999860680  | -3.26588999799842 | -2.73055999866832 |
| H | 0.80877999860674  | -3.08367999754520 | -2.99968000050904 |

|   |                   |                   |                   |
|---|-------------------|-------------------|-------------------|
| H | -4.38849000026949 | 5.57072000073170  | -3.02654000083099 |
| C | -4.69626999965917 | 5.10302000209392  | -3.97289000052444 |
| H | -3.69272000041988 | 2.44639999783194  | -5.97093999889107 |
| C | -4.30711000073258 | 3.30215999973619  | -5.65895000239406 |
| H | -2.27214000107359 | 5.08282000097705  | -5.24002999820313 |
| H | -1.69662999967953 | 3.49859999884683  | -4.66889000026141 |
| H | -5.35117999826716 | 2.96319999997213  | -5.59471000068463 |
| H | -4.67200000129442 | -6.95709000051501 | -0.56760999932414 |
| H | -3.86202999944509 | -4.15828000105500 | 2.86885000041046  |
| H | -7.84941999994493 | -2.71999000164262 | 3.63982999775249  |
| H | -7.58139999905774 | -0.98772999781338 | 1.88250999755112  |
| H | -0.56222999778892 | -7.67307999806380 | 0.52027000228404  |
| H | -2.73901000112959 | -8.52143000039818 | -0.32035999740267 |
| H | -5.96823999920041 | -4.28470999826272 | 4.14412000198347  |
| H | -2.02133000210594 | 4.79850999956599  | -3.50070999776009 |
| H | -4.44671000145369 | -4.58554999802067 | 0.05819999937845  |
| H | -6.23703000045383 | 0.07337999789377  | 0.14973999921063  |
| H | -5.76228999784445 | 4.84271999827327  | -3.89926999931658 |
| H | -2.57613000251254 | 1.44568999763238  | -4.25899000152819 |
| H | -2.67631000022471 | -0.32323000089319 | -2.60376000078139 |
| H | -4.59044999944309 | 5.85510999774483  | -4.76807999804679 |
| H | -4.24092999834104 | 4.07101000080139  | -6.44361999944798 |
| H | 1.75480000021392  | -5.39903000054823 | -2.84527999819249 |
| H | 3.57260999822655  | -6.91953999857081 | -2.28938000179003 |
| H | 5.88614000217182  | -7.30862000164869 | -1.47566000172911 |
| H | 7.35029999886772  | -5.36348999893700 | -0.91294000174783 |
| H | 6.53259000255370  | -3.06034999791520 | -1.20374999804162 |
| C | 4.84322000191513  | -1.10947999940336 | -1.78278999783275 |
| C | 4.36894000206020  | -0.19738999921243 | -0.85309000141820 |
| C | 5.02715999932950  | 1.01551999814534  | -0.51570000148301 |
| C | 6.24496000148652  | 1.25895000193728  | -1.12899000113187 |
| C | 6.78779999904750  | 0.38108000255996  | -2.09557999912689 |
| C | 8.01576000253172  | 0.67436999844453  | -2.74621999814083 |
| C | 8.49931999759858  | -0.14132999761862 | -3.74512000069365 |
| C | 7.76275000208117  | -1.28032999945405 | -4.14386000142238 |
| C | 6.57636000105158  | -1.60423000223336 | -3.51933999888647 |
| C | 6.06735000073301  | -0.80503000027867 | -2.46268000244997 |
| H | 6.01408000134646  | -2.48043999914503 | -3.83953999986234 |
| H | 8.13314000061956  | -1.90620000186906 | -4.95699000074088 |
| H | 9.43319000038435  | 0.09568000187055  | -4.23744000059188 |
| H | 8.56146000186815  | 1.57172000040147  | -2.44752000140146 |
| H | 6.79534000169046  | 2.16644000227665  | -0.87297999970165 |
| C | 4.39843000046743  | 2.01494999809581  | 0.37809999930602  |
| C | 3.78358999853527  | 1.66780000205497  | 1.59157999993522  |
| C | 3.18858999843896  | 2.63857000249809  | 2.39446000084328  |
| C | 3.16945000224333  | 3.99032000143961  | 2.02519000040284  |
| C | 3.76858999917773  | 4.33097999912430  | 0.80008999860126  |
| C | 4.37343000219941  | 3.37070000012735  | -0.00672000017106 |
| H | 4.81604000018153  | 3.66402000029410  | -0.96133999904620 |
| H | 3.75809000153103  | 5.36763000087174  | 0.45896999799432  |
| C | 2.52661000012540  | 5.07371999842102  | 2.89489000148145  |
| C | 1.92416000104453  | 4.49951000152758  | 4.18461999780860  |
| H | 1.12889000277917  | 3.77332000206287  | 3.96824999973484  |
| H | 1.48180999839254  | 5.31670999827748  | 4.77237000005832  |
| H | 2.68826999804008  | 4.01532000062366  | 4.81062999954441  |
| C | 3.60036999929092  | 6.11633999876761  | 3.26808999924231  |
| H | 4.03366999740177  | 6.59202000040413  | 2.37694999766554  |
| H | 4.41849000251877  | 5.65146999776659  | 3.83745999960570  |

|      |                    |                   |                   |
|------|--------------------|-------------------|-------------------|
| H    | 3.15472000046660   | 6.90726000210766  | 3.88970999965876  |
| C    | 1.39860999951556   | 5.75801999611441  | 2.09723000012477  |
| H    | 1.78179999945850   | 6.22556999773723  | 1.17979000164113  |
| H    | -1.73750191251085  | 1.04910649245866  | 3.01213249515000  |
| 142  |                    |                   |                   |
| 3b_3 | (TS1-1)            |                   |                   |
| C    | -4.003909999748598 | -1.39392999988061 | -2.33904000202004 |
| C    | -6.75082000026197  | -0.94445000154589 | -2.49639999966577 |
| C    | -5.85689999799743  | -0.07366000157793 | -3.11862999842278 |
| C    | -7.19638999851149  | -3.05216000165714 | -1.18458999952417 |
| H    | -0.73252991553918  | -2.02173994814966 | 4.50257995686790  |
| C    | -2.02294000284768  | -6.03531999981806 | 4.99041000242051  |
| C    | -6.25479999869711  | -2.04693000253021 | -1.79688999860552 |
| C    | -4.47965999835009  | -0.29798999961334 | -3.05210999968325 |
| C    | 2.40809999834243   | -0.73060999988145 | -3.40032000096212 |
| F    | -6.13345999818042  | 0.93000999904247  | -5.25013000130587 |
| C    | -1.40585000224214  | -4.08844999879387 | 6.42482000013742  |
| H    | -1.47975999779403  | -6.70111999979861 | 5.67645999983034  |
| C    | -4.88080999909418  | -2.27413999995042 | -1.70684999923242 |
| H    | -4.48932000126985  | -3.13581000111675 | -1.16656000069039 |
| H    | -2.44460000180057  | -3.94403999953822 | 6.75532000165131  |
| H    | -7.82208999738846  | -0.76305000185132 | -2.54852999784145 |
| H    | -0.89059000158045  | -3.12092000209050 | 6.49546999950485  |
| C    | 3.62342000051868   | -0.95936999996777 | -2.72525000145177 |
| C    | 1.85374999967741   | -1.70216999834080 | -4.22477000065400 |
| H    | 1.88125000014278   | 0.21391000126354  | -3.28267000088899 |
| C    | -6.35169999745051  | 1.10661999771612  | -3.91518000261547 |
| F    | -7.68210999963154  | 1.32598000046835  | -3.75487000081580 |
| F    | -5.70509000034244  | 2.25569999987124  | -3.56657000132493 |
| H    | -3.77548999924612  | 0.36401000000039  | -3.55353000066445 |
| C    | 4.26686999715465   | 0.06792000038182  | -1.87476000167773 |
| C    | 4.25038000268406   | -2.19872999868858 | -2.92940999779513 |
| C    | 2.48169000032365   | -2.94065000230391 | -4.44014000210191 |
| H    | 0.89257999874361   | -1.48705000143911 | -4.69424999783602 |
| H    | -1.17135999774215  | 3.39906999994717  | -2.15176000191221 |
| F    | -8.47291000139368  | -2.59752999761239 | -1.10938000094815 |
| H    | 0.50307000123250   | 3.32400000126538  | 2.32592000042777  |
| C    | 3.51922999554688   | 0.99816000509895  | -1.09713999141552 |
| C    | 5.64694999775280   | 0.19579000104231  | -1.83470000143412 |
| C    | 3.69719999886735   | -3.15938999987766 | -3.77734999900272 |
| H    | 5.17652999779941   | -2.42872999834575 | -2.40067000091146 |
| C    | 1.82098000244275   | -3.98248999951389 | -5.34584000232127 |
| C    | -1.97638999785664  | 3.58384000115345  | -1.45720999998426 |
| O    | 2.12786999730979   | 0.87161999655616  | -1.11042996946194 |
| C    | 4.08384999597831   | 2.05128999763285  | -0.38811000013220 |
| H    | 6.26096000185167   | -0.46878999746364 | -2.44406999870513 |
| C    | 6.29437999790648   | 1.15960999938629  | -1.02880000196626 |
| H    | 4.22566000272449   | -4.10435000120861 | -3.90119999808385 |
| C    | 1.60576999785604   | -3.37025999996224 | -6.74553000101876 |
| C    | 0.45649999978503   | -4.37949999805963 | -4.74473000027638 |
| C    | 2.67553999980502   | -5.24831000221744 | -5.49851999909142 |
| C    | -2.72058999888883  | 2.49514999827454  | -0.92380999970312 |
| C    | -2.35519999958250  | 4.85129999816939  | -1.04403999833885 |
| P    | 1.34918042488241   | 0.46058007164813  | 0.24367985445399  |
| C    | 5.51178999941506   | 2.10443000085517  | -0.28544999824887 |
| C    | 3.21599999750374   | 3.10086999938187  | 0.21078999754675  |
| C    | 7.71064999753236   | 1.21148999795415  | -0.93754000015350 |
| H    | 2.56352000058591   | -3.06864999931547 | -7.19437000197046 |



|   |                   |                   |                   |
|---|-------------------|-------------------|-------------------|
| H | 1.12970999964314  | -4.10731999762474 | -7.40930999927371 |
| H | 0.95584000105548  | -2.48579999798613 | -6.70457999835639 |
| H | -0.19848999990268 | -3.50932999862882 | -4.60317000174599 |
| H | -0.05727000237373 | -5.08818000034396 | -5.41145999827576 |
| H | 0.58106999723800  | -4.87039000323865 | -3.76896000092815 |
| H | 2.82697000039692  | -5.75976000157928 | -4.53625000275671 |
| H | 2.16454000222056  | -5.95599999810530 | -6.16659000019122 |
| H | 3.66126999879317  | -5.02729999839869 | -5.93423999843799 |
| O | -2.37449999785005 | 1.20710000062053  | -1.33767000420438 |
| C | -3.77314999893944 | 2.62553999821136  | -0.02941999822247 |
| H | -1.83197000218311 | 5.71948000081124  | -1.44956999879461 |
| C | -3.39688000010981 | 5.06336000135711  | -0.11094000139989 |
| O | 2.02468993944049  | 1.39222999521957  | 1.37154003193487  |
| N | -0.12939003146625 | 0.81609998139651  | -0.05476998035758 |
| N | 1.76150962502469  | -1.05275010751635 | 0.70704006259710  |
| C | 6.18380000104409  | 3.02938000246759  | 0.55404999721044  |
| C | 3.35936000184523  | 4.48337999732015  | -0.14625000219015 |
| C | 2.18571999383740  | 2.75396999853992  | 1.06982000271711  |
| H | 8.29611000160492  | 0.49057000012013  | -1.51126000148637 |
| C | 8.33376000214525  | 2.13120000163272  | -0.12208999801869 |
| P | -1.57373000308580 | 0.24778999728418  | -0.30653001697520 |
| C | -4.45638000121106 | 1.41406999788256  | 0.49964999847427  |
| C | -4.11789000030701 | 3.94234999797265  | 0.42238999923681  |
| C | -3.72143000176490 | 6.37258000185201  | 0.33542000011122  |
| S | 2.29907024074650  | -1.48317977200074 | 2.19976995587449  |
| H | 1.47054989415172  | -2.11962999501319 | -0.08184994993115 |
| C | 7.56086000149516  | 3.03926000006703  | 0.63711999756164  |
| H | 5.59701000063522  | 3.72516999873524  | 1.15221000071908  |
| C | 4.30342000022530  | 4.94440999797242  | -1.10059999834364 |
| C | 2.46772999845202  | 5.44096999820863  | 0.44423000004647  |
| C | 1.28290000147426  | 3.67493000070423  | 1.66781000007311  |
| H | 9.42217999760347  | 2.15272999997802  | -0.05157000192156 |
| O | -2.31996000178951 | 0.52586999945540  | 1.10271000054386  |
| N | -1.78639000321720 | -1.25866000381514 | -0.78175000153552 |
| C | -3.71251000135745 | 0.41013000107113  | 1.10770000114950  |
| C | -5.87562999797090 | 1.24212000227124  | 0.41041999984604  |
| C | -5.10352000058989 | 4.18926999951464  | 1.41392000244544  |
| H | -3.17110999966003 | 7.21579000007909  | -0.08760000027039 |
| C | -4.69395000196840 | 6.57773999997216  | 1.28929999765436  |
| O | 2.29108009058855  | -2.93935006532835 | 2.20417998805226  |
| O | 1.62491976700549  | -0.76016015728999 | 3.26643007383800  |
| H | 8.05581999772621  | 3.74571000149421  | 1.30456000239322  |
| H | 4.96773999731143  | 4.22799000145978  | -1.58013000239710 |
| C | 4.38191999955597  | 6.28016000141109  | -1.43759999988580 |
| C | 2.58685000039700  | 6.81094999891519  | 0.08738000064831  |
| C | 1.46585999961675  | 5.01005000124678  | 1.34492999998818  |
| H | -3.58359000291552 | -5.03002000055998 | 3.31527000110557  |
| S | -2.23490999852835 | -1.70811999819716 | -2.25539999798845 |
| C | -4.27802999986192 | -0.71730000145712 | 1.76718000211454  |
| C | -6.47621000216585 | 0.11398999869244  | 1.06203999797741  |
| C | -6.70833999835106 | 2.11695000048262  | -0.33343999887793 |
| C | -5.38305000255727 | 5.47229000243052  | 1.83791000060947  |
| H | -5.63992999764344 | 3.34840999786021  | 1.84993999777562  |
| H | -4.92811000120705 | 7.58796000258323  | 1.62782999857892  |
| H | 5.11046000092001  | 6.60638999799705  | -2.18134999880488 |
| C | 3.52309000259512  | 7.22638000014127  | -0.83378000207046 |
| H | 1.90729000130746  | 7.52868000004164  | 0.55178000204472  |
| H | 0.81228999978013  | 5.75778000039990  | 1.79834000295344  |

|               |                    |                   |                   |
|---------------|--------------------|-------------------|-------------------|
| H             | -2.00252999738293  | -6.49960000001810 | 3.99328999828237  |
| H             | 3.57183974367837   | -1.03166278417744 | 2.14164448569612  |
| O             | -1.61409999820179  | -0.93409999904260 | -3.32872999776880 |
| O             | -2.11086999751089  | -3.16802999778334 | -2.31304999786219 |
| C             | -5.66110999781380  | -0.81380000104811 | 1.74995000116400  |
| C             | -3.46066000134147  | -1.72403999740271 | 2.48251000021677  |
| C             | -7.88411000015493  | -0.05689000023427 | 0.98959999877939  |
| C             | -8.07057999897521  | 1.90945000191257  | -0.40339000251675 |
| H             | -6.25611999947245  | 2.95037999954852  | -0.86923000129259 |
| H             | -6.14034000047950  | 5.63291999775826  | 2.60680999832106  |
| H             | 3.59820999883690   | 8.28041000191054  | -1.10446999836880 |
| H             | -3.06826999731148  | -5.98747999897381 | 5.32867000112449  |
| C             | 0.10996000172008   | -4.81721000072441 | 4.55724999765031  |
| H             | 0.64956999747063   | -5.43953999740607 | 5.28720999878746  |
| C             | -2.07554999720748  | -3.66527000226981 | 4.05711999748009  |
| H             | -6.14426999859734  | -1.63621000150633 | 2.27916000230247  |
| C             | -2.30037999728303  | -1.38535000155790 | 3.20474999940307  |
| C             | -3.87697000190430  | -3.06367999828289 | 2.52459000163377  |
| H             | -8.33051000216754  | -0.91681000161802 | 1.49252000035044  |
| C             | -8.66787999912269  | 0.82162999829073  | 0.27332000165421  |
| H             | -8.68886999824508  | 2.58382000029331  | -0.99729000215415 |
| C             | -1.36057999741654  | -4.65086999865949 | 4.98782999729662  |
| H             | 0.16900000172217   | -5.31849000188309 | 3.58070999743577  |
| H             | -0.91498000107648  | -4.78612999926905 | 7.12010000208199  |
| H             | 0.63240999762069   | -3.85485999735272 | 4.47593999919642  |
| C             | -1.627769998228857 | -2.33688999610623 | 3.96355999480355  |
| H             | -1.92425999821747  | -0.36431000259152 | 3.19272999763028  |
| C             | -3.20461999982925  | -4.00819999966017 | 3.30097999970998  |
| H             | -4.74490999909241  | -3.37567000094062 | 1.94064999821822  |
| H             | -9.74660000163639  | 0.67027000223678  | 0.21374999930371  |
| F             | -6.81770999980204  | -3.40299000190130 | 0.08056000143323  |
| F             | -7.22610000195442  | -4.20689000233701 | -1.90949999861856 |
| 142           |                    |                   |                   |
| 3b_3 (TS1-1') |                    |                   |                   |
| C             | -3.90652000175041  | 1.38616000135118  | -3.18522000215061 |
| C             | -6.25928000235236  | 0.19539000025262  | -2.27747000112363 |
| F             | -4.03006999972050  | 4.24575999986133  | -3.12713999826639 |
| H             | -5.07235000240471  | -1.59459000229814 | -2.00435999802825 |
| H             | -6.82006000163409  | -6.87530000076644 | 2.56350999918266  |
| C             | -4.79483000066817  | -5.59785000064744 | 3.93204999744025  |
| H             | -6.41834999938861  | -3.22961000028482 | 3.69091999859293  |
| C             | -5.08236999933856  | -0.55159000087746 | -2.31888000173162 |
| C             | 4.08321999960808   | -1.92355998856768 | -3.26974999392278 |
| C             | -4.35302000235986  | -6.27206000236675 | 1.57077000036127  |
| C             | -5.07880000053832  | 3.54261000039944  | -3.64020999990321 |
| C             | -5.09410000078646  | -3.90112999856097 | 2.11275000011493  |
| H             | -3.73735000190215  | -4.15380999889626 | 0.43924000147561  |
| F             | -4.94538000097521  | 3.58475000076806  | -4.99834999917931 |
| C             | -5.22899999777123  | -5.38436999805285 | 2.46720999740316  |
| C             | -3.90969000109285  | 0.06065000146744  | -2.76297999837536 |
| F             | -7.33308000099778  | -1.45878000016830 | -0.94457999910726 |
| C             | 3.48303002210250   | -0.76145002473806 | -2.75980001268179 |
| C             | 3.47794999668470   | -2.66679998976432 | -4.28399999551550 |
| H             | 5.03823999485349   | -2.25956999589702 | -2.86222000297359 |
| F             | -8.20007000052236  | -1.01836000218619 | -2.90388999833314 |
| C             | -6.70089999955882  | -5.81293999846240 | 2.30131000041302  |
| F             | -8.40663000046450  | 0.42340999830196  | -1.27140999832882 |
| F             | -6.21404000250225  | 4.21741999908986  | -3.33116000085361 |

|   |                   |                   |                   |
|---|-------------------|-------------------|-------------------|
| C | 4.19490999520958  | 0.04851000169291  | -1.74698999182056 |
| C | 2.23232006379270  | -0.39329013808632 | -3.28750006899975 |
| C | 2.24661999438791  | -2.28414999528084 | -4.83325000075124 |
| H | 3.98698999939778  | -3.55979999795360 | -4.64607000020896 |
| H | 0.47585142960412  | 3.35641484053141  | -1.44312162015330 |
| H | -7.19068999788107 | 2.11568000159941  | -2.62885000140471 |
| C | -5.09429000169361 | 2.12021999799287  | -3.14039999959378 |
| C | 3.52788000110865  | 0.71427000469759  | -0.68196999392382 |
| C | 5.57281000087799  | 0.18946000354602  | -1.79558000086173 |
| C | 1.63722001849180  | -1.13704004109001 | -4.29921002078045 |
| H | 1.72657985729260  | 0.50055030241955  | -2.93365985214025 |
| C | 1.56144999681542  | -3.04417999417603 | -5.97197999859451 |
| C | -0.19587982732770 | 3.64597949158632  | -0.64962028698200 |
| O | 2.13006999781172  | 0.62617999406877  | -0.63818000164717 |
| C | 4.16706000166439  | 1.45026999663572  | 0.30793000500761  |
| H | 6.12395000108085  | -0.25828999664044 | -2.62352000414208 |
| C | 6.29849000234158  | 0.87567999574857  | -0.79580000083189 |
| H | 0.66401999827011  | -0.80757998505872 | -4.66436999514571 |
| C | 2.38396999914004  | -4.24941999950500 | -6.44639999893730 |
| C | 1.36609999917205  | -2.08457999636772 | -7.16469999815314 |
| C | 0.18449999891753  | -3.54756999850156 | -5.49516999943262 |
| C | -1.31615005229427 | 2.82643018069871  | -0.32581975260488 |
| C | -0.00144000229472 | 4.76508012185517  | 0.14459012575504  |
| P | 1.50029997843962  | -0.35086000911689 | 0.48107000492728  |
| C | 5.60015000581061  | 1.48905999892216  | 0.29725000154885  |
| C | 3.36525000859522  | 2.16518006926351  | 1.33682997336663  |
| C | 7.71678999835777  | 0.93778999992269  | -0.83341000200450 |
| H | 2.53340000146279  | -4.98322999905708 | -5.64042000000195 |
| H | 1.85369999768855  | -4.75767999840101 | -7.26451999764936 |
| H | 3.37130999889910  | -3.94669999891217 | -6.82495000128168 |
| H | 0.87952000176686  | -2.61169999849998 | -7.99917000081198 |
| H | 0.73482999665783  | -1.22787000148154 | -6.89262000298235 |
| H | 2.33290000124496  | -1.69693000003944 | -7.51770000105587 |
| H | 0.30356000220030  | -4.27188000157072 | -4.67592999997272 |
| H | -0.45484999930189 | -2.73153000182134 | -5.13234000268049 |
| H | -0.34198999872816 | -4.05324000354983 | -6.31883000126210 |
| O | -1.47088998967246 | 1.62716000805916  | -1.03258005790761 |
| C | -2.28753006029003 | 3.16927003888336  | 0.601679990384659 |
| H | 0.83561998854845  | 5.43147000965023  | -0.07041001435116 |
| C | -0.86288008409748 | 5.08933013614959  | 1.21802996367709  |
| O | 2.23271007482438  | 0.11341005297287  | 1.83954999479200  |
| N | -0.03200000779839 | -0.10731999748481 | 0.49277001238292  |
| N | 2.03609005334123  | -1.87563997896706 | 0.24307999059412  |
| C | 6.36228999806933  | 2.07525999873010  | 1.34020999975566  |
| C | 3.51361000319424  | 3.57588000586269  | 1.55943999429978  |
| C | 2.39355983542758  | 1.49062984861576  | 2.06565005116000  |
| H | 8.23546000158617  | 0.47306999903874  | -1.67405999891856 |
| C | 8.42629999858416  | 1.54030999902507  | 0.18273999825874  |
| P | -1.38527999213820 | 0.21389999447392  | -0.24380002341842 |
| C | -3.56438998183672 | 2.41321996472631  | 0.69319001217918  |
| C | -2.03848998163919 | 4.30094996124001  | 1.44730999916283  |
| C | -0.59654000735488 | 6.19775000596170  | 2.06472999839747  |
| S | 2.78231993317110  | -2.84892004321736 | 1.35203000722286  |
| H | 1.32231999189325  | -2.60769000306668 | -0.64104999525985 |
| C | 7.74077000188421  | 2.09929999954261  | 1.28491999716581  |
| H | 5.84664999905880  | 2.49751000103067  | 2.20116000183675  |
| C | 4.37658999417147  | 4.39742999890778  | 0.78572999876220  |
| C | 2.71270007605223  | 4.20203998872032  | 2.57137997489829  |

|   |                   |                   |                   |
|---|-------------------|-------------------|-------------------|
| C | 1.54784014448573  | 2.09509010400877  | 3.03545989977516  |
| H | 9.51623000128259  | 1.57034000143308  | 0.14768000248090  |
| O | -2.37639999601459 | 0.36349000410446  | 1.03169000505730  |
| N | -1.89254999163097 | -0.91141000974579 | -1.24305999626538 |
| C | -3.59185000215307 | 1.04367999463018  | 0.92564999377803  |
| C | -4.81134999416603 | 3.10788999816411  | 0.53387999828654  |
| C | -2.87588997334669 | 4.63825997089420  | 2.54261001930806  |
| H | 0.29611001315932  | 6.79473998337014  | 1.86909000630710  |
| C | -1.43085997157860 | 6.50046996306474  | 3.11890002744592  |
| O | 2.85942001391572  | -4.15070998594039 | 0.70470999573935  |
| O | 2.20164002178749  | -2.71711998349773 | 2.67824999635479  |
| H | 8.30517999821069  | 2.54144000281659  | 2.10681000162813  |
| H | 4.95914000382332  | 3.94859999711005  | -0.01711999491628 |
| C | 4.47647999753467  | 5.75228000197079  | 1.02625999914994  |
| C | 2.86108999601653  | 5.59410000394738  | 2.81325000900193  |
| C | 1.75867984939601  | 3.44213992759738  | 3.28378016435827  |
| H | 0.80209192354271  | 1.50610111108616  | 3.54672814840253  |
| S | -2.36600000222843 | -0.85883999737550 | -2.76903999569108 |
| C | -4.79429999817253 | 0.32097000313657  | 1.19004000361321  |
| C | -6.03216999778477 | 2.40102000102886  | 0.78379000668060  |
| C | -4.89193000149884 | 4.45440000118921  | 0.09311000324999  |
| C | -2.57433999613141 | 5.70546999645521  | 3.36355000526136  |
| H | -3.75588000039680 | 4.02842000377726  | 2.74362999732406  |
| H | -1.21062000618837 | 7.34926000854618  | 3.76812998917238  |
| H | 5.14048999838719  | 6.36127999845321  | 0.41116000262159  |
| C | 3.72569998940115  | 6.35731000445238  | 2.06018998735115  |
| H | 2.25710999252474  | 6.04812000577523  | 3.60120999525434  |
| H | 1.14972003432534  | 3.94343001243402  | 4.03790993613090  |
| C | -7.54418000258219 | -0.46458000146719 | -1.84292999791904 |
| H | -5.41358999929157 | -5.01659000203375 | 4.62986000085507  |
| O | -1.45410000200664 | -0.12194999858584 | -3.63944999922667 |
| O | -2.70739999788455 | -2.23645999952347 | -3.14521999904070 |
| C | -5.98048000020189 | 1.03599000263590  | 1.14254000465267  |
| C | -4.84004999732329 | -1.12203999804486 | 1.52263000120902  |
| C | -7.27250000051462 | 3.07392000220593  | 0.62583000462369  |
| C | -6.11285000140907 | 5.07650000118783  | -0.06594999966373 |
| H | -3.97601999886223 | 4.99293000222122  | -0.14453000192576 |
| H | -3.22308001348985 | 5.93598001640585  | 4.20980999102928  |
| H | 3.82546000726815  | 7.42684999997926  | 2.25086000659251  |
| H | -3.28731000141147 | -6.02001999961352 | 1.66762999855668  |
| H | 3.99991598283204  | -2.26140956841129 | 1.36171211044009  |
| H | -3.74749000019494 | -5.29552000173659 | 4.07263999892984  |
| H | -4.88678000171500 | -6.66056000077152 | 4.20320000206541  |
| H | -6.91792000201511 | 0.50730999664376  | 1.32329999624818  |
| C | -5.66540000011842 | -1.57104000244088 | 2.56929000092709  |
| C | -4.15701999782188 | -2.09055000005761 | 0.77819000019238  |
| H | -8.19273000062709 | 2.51891999809067  | 0.81793000035569  |
| C | -7.31501000181514 | 4.38749000260854  | 0.21215000059943  |
| H | -6.14995999777924 | 6.10531999974089  | -0.42639999942190 |
| H | -2.98168000056263 | 1.83159000010261  | -3.54799000237144 |
| H | -7.36840000254453 | -5.22688999887275 | 2.94872000232649  |
| H | -4.62904999988787 | -6.18226000068665 | 0.51042999973704  |
| H | -4.47955999972675 | -7.32461000117182 | 1.86413000106522  |
| C | -5.78232000086431 | -2.92722999955827 | 2.85674000182449  |
| H | -6.20283000255946 | -0.84316999782891 | 3.18029000138219  |
| C | -4.28967999893680 | -3.44937999907346 | 1.06069999963119  |
| H | -3.51264000102785 | -1.79052000157243 | -0.04495000017494 |
| H | -8.27339000058954 | 4.89252999854532  | 0.08353999813326  |

|      |                   |                   |                   |
|------|-------------------|-------------------|-------------------|
| C    | -6.27224000197864 | 1.53382000059920  | -2.68162999875303 |
| H    | -7.03166000164771 | -5.67497000094484 | 1.26183000130220  |
| 142  |                   |                   |                   |
| 3b_3 | (TS1-2')          |                   |                   |
| C    | -6.13794999802205 | 1.64381999818774  | 4.23942999793021  |
| C    | -4.05310999963789 | -1.21521999867901 | -5.70148000102835 |
| H    | -6.32252000199961 | 0.30772000214860  | 5.93471999919727  |
| C    | -3.63898000170229 | -1.93033000110804 | -3.34545999875631 |
| F    | -8.31941999837062 | -0.98159000221573 | -2.11017999826930 |
| H    | -4.61538999934424 | 2.78572000222750  | 5.31525999969200  |
| H    | -6.04998000214290 | 3.79021000005836  | 2.52479999852235  |
| H    | -2.72239000022104 | -2.41825999973913 | -3.67279999753880 |
| C    | 1.60213002201370  | -4.26886015236330 | -0.07599986867012 |
| H    | -6.15145999800281 | -0.54849999764421 | 4.38650000187628  |
| H    | -5.95190000185908 | 3.78803000154371  | 4.70552999737838  |
| F    | -7.63071999745531 | 0.99170000171833  | -2.75781000041479 |
| H    | -8.19398000167906 | 1.65758000260525  | 4.97712000229263  |
| H    | -4.61832000057567 | -0.26825000238574 | 2.85699999758519  |
| C    | -5.18576000196339 | -1.39121999912861 | -1.55406000210936 |
| C    | -4.00434000116355 | -1.98215999873358 | -2.00340999786301 |
| C    | -4.45383999772759 | -1.24380999859243 | -4.24815999828844 |
| C    | 2.70252000051628  | -4.14101999026093 | 0.78669997519396  |
| C    | 0.53256000546777  | -5.10448998069934 | 0.24001998780314  |
| H    | 1.57603998204031  | -3.72213980408472 | -1.01547018434060 |
| H    | -7.94922000090783 | 2.66372000135204  | 3.52798000214450  |
| H    | -4.73419999830433 | 0.22090999986912  | 5.13442000184000  |
| C    | -5.62474999904958 | -0.62386999828351 | -3.81563000085366 |
| H    | -6.20611000159426 | 2.74406000261821  | 6.11894000005301  |
| C    | 3.85529999994224  | -3.25812999811144 | 0.50523999581163  |
| C    | 2.67924998415499  | -4.87874998199268 | 1.98253000058383  |
| C    | 0.51043999710263  | -5.85470997356296 | 1.42542999970016  |
| H    | -0.30363000442271 | -5.14352000487115 | -0.45732000762365 |
| H    | 1.48190005333077  | -1.16110942881478 | -3.47989941413119 |
| H    | -8.00479000023685 | 0.89365000022690  | 3.37620999967291  |
| H    | 2.92206228247112  | 0.31876722180506  | 3.40202209137018  |
| C    | 3.69309000637825  | -1.95345000052466 | -0.03119000686265 |
| C    | 5.14636999745008  | -3.62619000156231 | 0.84130000276966  |
| C    | 1.61191999827658  | -5.71942999640440 | 2.28695000035619  |
| H    | 3.48955000013829  | -4.75381000247871 | 2.70228999650490  |
| C    | -0.63011999966159 | -6.82734999702404 | 1.74463000278288  |
| C    | 1.14042006290814  | -0.14311032122830 | -3.58691948009260 |
| O    | 2.39433000379625  | -1.56215001685836 | -0.39036000177281 |
| C    | 4.71214998909488  | -1.02994000156099 | -0.19509000245492 |
| H    | 5.32995000185430  | -4.63146000051519 | 1.22499000111032  |
| C    | 6.23094999667786  | -2.72164999777879 | 0.76693000204880  |
| H    | 1.63990000476834  | -6.26807000764522 | 3.22904000113022  |
| C    | -0.94767000150697 | -6.83760000112027 | 3.25176999946461  |
| C    | -0.17751999752330 | -8.24200999953339 | 1.32223999702752  |
| C    | -1.91752999732362 | -6.46887000314357 | 0.98501000026407  |
| C    | -0.12971000337575 | 0.24904027107744  | -3.07199025634404 |
| C    | 1.89622990761082  | 0.86083015903657  | -4.17628042930709 |
| P    | 1.65707997004495  | -0.56989994022552 | 0.63555002157663  |
| C    | 6.01844000042115  | -1.38760999909451 | 0.28180999827280  |
| C    | 4.44576000833770  | 0.29102000687412  | -0.82131999019591 |
| C    | 7.52503000009006  | -3.09441000209546 | 1.21731000002084  |
| H    | -0.10651000026724 | -7.20514999905178 | 3.85496000179583  |
| H    | -1.20708999746405 | -5.83038999136945 | 3.60924999908388  |
| H    | -1.80524999867298 | -7.49798000167874 | 3.44677000192104  |

|   |                   |                   |                   |
|---|-------------------|-------------------|-------------------|
| H | 0.04112000081461  | -8.27428000247368 | 0.24517000207826  |
| H | 0.73147999850328  | -8.54368999886894 | 1.86260000200048  |
| H | -0.96822000165892 | -8.97764000089587 | 1.53631000149701  |
| H | -2.24874000147150 | -5.44161999782932 | 1.19210999948105  |
| H | -1.79848000160164 | -6.56055000148051 | -0.10276999735420 |
| H | -2.72419999821764 | -7.15357000006571 | 1.28508000005389  |
| O | -0.88409002081585 | -0.70437010565406 | -2.36140998935739 |
| C | -0.67990004747138 | 1.51095990254598  | -3.23581999448252 |
| H | 2.86617001946000  | 0.61102998072348  | -4.60903990169170 |
| C | 1.46303996869244  | 2.20430997205948  | -4.23728009001613 |
| O | 2.62032999682851  | 0.72451997605551  | 0.69832998748248  |
| N | 0.25154000919843  | -0.27336001688575 | 0.05356999404126  |
| N | 1.56953002084148  | -1.07841002737911 | 2.17240998640462  |
| C | 7.09578999771258  | -0.46666000079078 | 0.34443000061580  |
| C | 5.23803998996963  | 0.74008999122041  | -1.93346000719097 |
| C | 3.43599002787847  | 1.13158001685710  | -0.36493998012970 |
| H | 7.67661999796287  | -4.11592000061228 | 1.57215999994309  |
| C | 8.55843999827693  | -2.18339999975172 | 1.23905000123005  |
| P | -1.07004999136309 | -0.46157999711717 | -0.77125998779345 |
| C | -2.09488998210891 | 1.78543001355376  | -2.87338996310452 |
| C | 0.15453006483904  | 2.54927000852954  | -3.76621986396566 |
| C | 2.30303004496592  | 3.22459000269221  | -4.75722989127263 |
| S | 2.63693999732484  | -1.00262000185899 | 3.43172000367404  |
| H | 0.41643999156663  | -1.73469000589191 | 2.51310000532978  |
| C | 8.33318999910346  | -0.85390999863719 | 0.81673000176991  |
| H | 6.93529000050111  | 0.56361000168832  | 0.03036999781310  |
| C | 6.14673000692528  | -0.11036999586168 | -2.61729999487926 |
| C | 5.07402998724991  | 2.08031999781451  | -2.41292001338763 |
| C | 3.25253998530250  | 2.46694999902745  | -0.82617000932558 |
| H | 9.54398999732777  | -2.47934999983126 | 1.60123000172366  |
| O | -1.69606999606659 | 1.03549000750431  | -0.63841999868093 |
| N | -2.07138000610234 | -1.53578999356685 | -0.18675000567804 |
| C | -2.56671999881040 | 1.57135000234153  | -1.58576000157599 |
| C | -3.00095999616319 | 2.30276000875460  | -3.85850000349270 |
| C | -0.23469000014234 | 3.91318000113868  | -3.78199000422656 |
| H | 3.29186000079274  | 2.94396000086087  | -5.12548999969850 |
| C | 1.89159000348997  | 4.53924999719229  | -4.76921998783443 |
| O | 3.86045999632358  | -1.73784999766759 | 3.16024000161671  |
| O | 1.83602999758087  | -1.33214999409717 | 4.60200000077106  |
| H | 9.14123000149313  | -0.12309000010565 | 0.87167000035158  |
| H | 6.25754999803002  | -1.14209000057804 | -2.28635000393018 |
| C | 6.87300000669019  | 0.34579000237143  | -3.69801999675013 |
| C | 5.85463999651778  | 2.52716999653967  | -3.51195000244343 |
| C | 4.10729000589069  | 2.91917999482967  | -1.81502999624266 |
| H | 2.46735514769331  | 3.07727894642063  | -0.40622556711096 |
| S | -2.88109999875766 | -2.75305999937585 | -0.83217999900443 |
| C | -3.84554999706283 | 2.01296000160082  | -1.13628000028599 |
| C | -4.31055000273087 | 2.71096999974250  | -3.44319000243599 |
| C | -2.67154000331572 | 2.39074999666894  | -5.23569000041012 |
| C | 0.61768999825533  | 4.88526999955605  | -4.26192001089144 |
| H | -1.21028001301096 | 4.19184999590989  | -3.38629002113446 |
| H | 2.54995998722733  | 5.31728999447072  | -5.15903002959057 |
| H | 7.55444999554355  | -0.33170000197746 | -4.21452000472511 |
| C | 6.73899000615093  | 1.68050000333166  | -4.14394999352931 |
| H | 5.72657000303722  | 3.55631999844425  | -3.85420999692770 |
| H | 3.97710000403822  | 3.93244000603287  | -2.19814999573235 |
| C | -5.44405000036230 | 1.73914000078153  | 2.87736000068664  |
| H | -5.46450000074378 | -1.45338000075310 | -0.50292000143033 |

|   |                   |                   |                   |
|---|-------------------|-------------------|-------------------|
| O | -2.04021999804166 | -3.66406000135999 | -1.60098000237862 |
| O | -3.70741999743379 | -3.31200000308425 | 0.24529999987768  |
| C | -4.67609999793412 | 2.59114999762331  | -2.08377999829640 |
| C | -4.30456000165987 | 1.91858000106954  | 0.26873999922717  |
| C | -5.22395999876299 | 3.20724999586866  | -4.41041000112770 |
| C | -3.58403000305720 | 2.87012999883339  | -6.15233999903298 |
| H | -1.69207000024834 | 2.05302000187123  | -5.57091000135588 |
| H | 0.30695000321139  | 5.93097000223074  | -4.24617999757756 |
| H | 7.32713999392804  | 2.03223999942039  | -4.99271000526962 |
| C | -5.81417000207480 | 0.32660999862994  | 4.95941999836703  |
| F | -7.23540000033084 | 0.30692999880781  | -0.71417999983516 |
| H | -6.24343999811384 | -0.06932999846284 | -4.51897000138790 |
| C | -5.98874999754079 | -0.70931999927278 | -2.46873000072044 |
| H | -5.67264000213254 | 2.91600999756323  | -1.78023999857915 |
| C | -4.17641999985609 | 0.75688000177197  | 1.04052999792858  |
| C | -4.97855999971208 | 3.01027000007185  | 0.84630999753044  |
| H | -6.21966000211934 | 3.50848000194623  | -4.07859999997533 |
| C | -4.86932000108545 | 3.28845999812834  | -5.73939999841518 |
| H | -3.31559999987254 | 2.91124000059068  | -7.20879000143290 |
| C | -7.28704000159408 | -0.09462000160617 | -2.00844999806804 |
| C | -5.70016000023606 | 2.81259000159023  | 5.14402999753227  |
| C | -7.66298000013885 | 1.72068999927819  | 4.01486999825888  |
| F | -2.73639999841614 | -0.89841999812373 | -5.85317000249211 |
| C | -4.74098999807019 | 0.66816999949835  | 2.31311000129926  |
| H | -3.64413999815592 | -0.10630000105222 | 0.64591999768194  |
| C | -5.53092000077441 | 2.91962999873123  | 2.11955999766174  |
| H | -5.06285999775508 | 3.94467000062312  | 0.28761999957340  |
| H | -5.58126999992971 | 3.66349999990925  | -6.47598000051600 |
| F | -4.22781999815483 | -2.43679000219815 | -6.28512000061844 |
| F | -4.77460000052134 | -0.32185000202460 | -6.42296000047223 |

126

3b\_4 (cat)

|   |                   |                   |                   |
|---|-------------------|-------------------|-------------------|
| H | 0.83586000205982  | -5.83991000158813 | 1.29773999796600  |
| H | -5.37322999642427 | 2.05755999832441  | -0.22900999830064 |
| C | -3.83478999872539 | 3.87792000105662  | -4.30792000116123 |
| C | -2.36741999826033 | 4.33714999925507  | -4.43634000125379 |
| H | -5.28610999865416 | 3.82624999985184  | -1.90383999863348 |
| C | -4.77977000006314 | 1.89882999650986  | -1.13001000177550 |
| H | 1.17062999788576  | -3.39937000081245 | 1.78822000156203  |
| C | -3.26420000195208 | 0.57659000036354  | -2.43855999845453 |
| C | -4.72110000237550 | 2.91275000058920  | -2.08504000248541 |
| C | -3.93564999790142 | 2.78637000292610  | -3.23810999911359 |
| C | -3.21494998279081 | 1.59119000353372  | -3.38689999085477 |
| C | 0.21410999860924  | -3.80057999974305 | 1.49078000198106  |
| C | 0.00385999856754  | -5.13986000155356 | 1.19958000176201  |
| C | -1.25098000045699 | -5.63645000120697 | 0.77498000018564  |
| C | -1.41871999961438 | -7.00242999896555 | 0.42255000111777  |
| C | -2.62643000007118 | -7.47151000165869 | -0.04642000141536 |
| C | -3.72117000119640 | -6.58703999834469 | -0.18108000087127 |
| C | -3.59717000146397 | -5.2579999883905  | 0.16882999817453  |
| C | -2.37045999919971 | -4.74485000171716 | 0.66549999859962  |
| C | -2.18320000237062 | -3.36683000001659 | 1.00670000076051  |
| C | -0.91758000177033 | -2.94597000036258 | 1.37970999895508  |
| O | -0.75089999833857 | -1.58188000184857 | 1.64663000173169  |
| P | -0.68401999698214 | -0.59113000217619 | 0.36668001021758  |
| N | -0.93474000188054 | 0.90381000187728  | 0.82917000330405  |
| S | -0.65496000072604 | 1.46619999724840  | 2.31421999816338  |
| O | -0.73287001854595 | 2.92170997012838  | 2.24804000636995  |

|   |                   |                   |                    |
|---|-------------------|-------------------|--------------------|
| O | 0.51071999971057  | 0.85799999944324  | 2.95701000193575   |
| H | 0.62354999387986  | 5.02840994028883  | 1.82892994209106   |
| H | 3.75504000158871  | 0.62660999947992  | 1.91117000302842   |
| C | -4.68084000178470 | -3.47850999793181 | 2.63580999929500   |
| C | -6.92161999839474 | -2.65479999986764 | 3.06965000152491   |
| C | -5.85993999932372 | -3.54590000085795 | 3.34896999964525   |
| O | 3.13487001087560  | -0.46195999735352 | -0.21738001196132  |
| H | 2.70194999956321  | 2.31522999753013  | 3.31196000579233   |
| C | -4.05547000118149 | 0.70639999789134  | -1.28257000341021  |
| O | -1.88953999951562 | -1.10326999922423 | -0.58293999534363  |
| C | -4.18920000055377 | -0.37805999958984 | -0.28382000038779  |
| C | -5.56817000147287 | -1.58425999722534 | 1.35374999810174   |
| C | -5.39177000133880 | -0.57661999823783 | 0.37926999943750   |
| C | -4.50320000210803 | -2.50726999808394 | 1.61734000213521   |
| C | -3.13794999845340 | -1.28838999777078 | 0.02787000225470   |
| C | -6.77716000216713 | -1.69605000018508 | 2.09030999745340   |
| C | -3.28483999810087 | -2.37625000207751 | 0.87928999919734   |
| H | 0.93234998647590  | 6.54613992503951  | 2.70752993166686   |
| N | 0.59803999690283  | -0.97145999800904 | -0.49360000280046  |
| P | 1.81168003840415  | -0.24307996769040 | -1.10149999651104  |
| N | 1.75216000806815  | 1.41528995555062  | -1.30400009271037  |
| S | 0.95366999126015  | 2.16173974707594  | -2.59888026906380  |
| O | -0.13265008295583 | 1.26477002920608  | -2.93607999610850  |
| O | 1.94282999862792  | 2.56892003747926  | -3.57842996827440  |
| H | 0.47236579549226  | 3.25080170372426  | -1.95860593324610  |
| C | 4.37343000030512  | 3.37069999945117  | -0.00671999865530  |
| C | 1.92415999730324  | 4.49950998907320  | 4.18461998204284   |
| C | 3.60036998724617  | 6.11633998774023  | 3.26808999232133   |
| H | 4.41849000297235  | 5.65146999842279  | 3.83745999593990   |
| H | 3.75808999195386  | 5.36762999745769  | 0.45896999996071   |
| C | 2.52660998789828  | 5.07371997040396  | 2.89488997834870   |
| H | 1.78180008727552  | 6.22557024465267  | 1.17979025934890   |
| H | -1.73750000045200 | 1.04910999981937  | 3.01212999900730   |
| H | 4.03367002317862  | 6.59201998994645  | 2.37694998471953   |
| C | 1.39861001562634  | 5.75802007712106  | 2.09723005872957   |
| H | 3.15471999891989  | 6.90726000659329  | 3.88970996556682   |
| H | 1.48180999073785  | 5.31671001142635  | 4.77236999883605   |
| H | 2.68827000659639  | 4.01532003941310  | 4.81063001941497   |
| H | 4.81604000128078  | 3.66402000235001  | -0.96133999789091  |
| H | 1.12889001619628  | 3.77332000585487  | 3.96825000930820   |
| C | 3.76858998846541  | 4.33097998764748  | 0.80008999914331   |
| H | 2.56957994817805  | 1.93409008628545  | -0.94893982704568  |
| O | 2.20454999184876  | -0.86057999330879 | -2.53797999964251  |
| C | 2.71400998149077  | -2.18009000574029 | -2.46266000297673  |
| C | 4.04333999646063  | -2.32257000053428 | -2.08784000317248  |
| C | 4.57381000102997  | -3.64340000127163 | -1.93365000011610  |
| C | 5.88490000273521  | -3.89940999799500 | -1.45339999814850  |
| C | 6.34146000055153  | -5.19102999859693 | -1.29079000179028  |
| C | 5.51136000250095  | -6.29221999780116 | -1.60361000247388  |
| C | 4.22883999797564  | -6.07785999987789 | -2.05821000240470  |
| C | 3.72150000179054  | -4.76054000012848 | -2.22046999997231  |
| C | 2.38508000169271  | -4.53627000059384 | -2.62186999949254  |
| C | 1.83752999443905  | -3.26589000177172 | -2.73055999828833  |
| H | 0.80877999914157  | -3.08367999787804 | -2.999679999890942 |
| H | -4.38848999920214 | 5.57072000063356  | -3.02653999815688  |
| C | -4.69626999984733 | 5.10302000208928  | -3.97289000002589  |
| H | -3.69272000084250 | 2.44639999778907  | -5.97093999878803  |
| C | -4.30711000056583 | 3.30215999972032  | -5.65895000253565  |



|   |                   |                   |                   |
|---|-------------------|-------------------|-------------------|
| H | -2.27214000117130 | 5.08282000082164  | -5.24002999827836 |
| H | -1.69662999986866 | 3.49859999861944  | -4.66889000056090 |
| H | -5.35117999866619 | 2.96320000021928  | -5.59471000085132 |
| H | -4.67200000125399 | -6.95709000053506 | -0.56760999946630 |
| H | -3.86202999945741 | -4.15828000094267 | 2.86885000034581  |
| H | -7.84941999987742 | -2.71999000150928 | 3.63982999794642  |
| H | -7.58139999905805 | -0.98772999769630 | 1.88250999774976  |
| H | -0.56222999775227 | -7.67307999805929 | 0.52027000233585  |
| H | -2.73901000103255 | -8.52143000035441 | -0.32035999769240 |
| H | -5.96823999915717 | -4.28470999822379 | 4.14412000208801  |
| H | -2.02133000206182 | 4.79850999918236  | -3.50070999785171 |
| H | -4.44671000162096 | -4.58554999820891 | 0.05819999944032  |
| H | -6.23703000052933 | 0.07337999813507  | 0.14973999936400  |
| H | -5.76228999780160 | 4.84271999851875  | -3.89926999889735 |
| H | -2.57612995123019 | 1.44568998975771  | -4.25898997320068 |
| H | -2.67630999826598 | -0.32322999983759 | -2.60376000014373 |
| H | -4.59044999903032 | 5.85510999807389  | -4.76807999743789 |
| H | -4.24092999849856 | 4.07101000082497  | -6.44361999949998 |
| H | 1.75480000044488  | -5.39903000027313 | -2.84527999801576 |
| H | 3.57260999833283  | -6.91953999858494 | -2.28938000203596 |
| H | 5.88614000215935  | -7.30862000172810 | -1.47566000158292 |
| H | 7.35029999896187  | -5.36348999908907 | -0.91294000161477 |
| H | 6.53259000272858  | -3.06034999810816 | -1.20374999774294 |
| C | 4.84322000216542  | -1.10947999795251 | -1.78279000120367 |
| C | 4.36894000647517  | -0.19739000506983 | -0.85309001184275 |
| C | 5.02715999860683  | 1.01551999761030  | -0.51570000194510 |
| C | 6.24496000129203  | 1.25895000219016  | -1.12898999992648 |
| C | 6.78779999918543  | 0.38108000235381  | -2.09557999860892 |
| C | 8.01576000267579  | 0.67436999825609  | -2.74621999781465 |
| C | 8.49931999769485  | -0.14132999772147 | -3.74512000049454 |
| C | 7.76275000231436  | -1.28032999982338 | -4.14386000084049 |
| C | 6.57636000117194  | -1.60423000250349 | -3.51933999814341 |
| C | 6.06735000036222  | -0.80502999910168 | -2.46268000262920 |
| H | 6.01408000153221  | -2.48043999937452 | -3.83953999938543 |
| H | 8.13314000046398  | -1.90620000175396 | -4.95699000077997 |
| H | 9.43319000015135  | 0.09568000205712  | -4.23744000075887 |
| H | 8.56146000172724  | 1.57172000056955  | -2.44752000151601 |
| H | 6.79534000168931  | 2.16644000236600  | -0.87297999969305 |
| C | 4.39842999983833  | 2.01494999955895  | 0.37809999989292  |
| C | 3.78358999746574  | 1.66780000091259  | 1.59158000260457  |
| C | 3.18858998997670  | 2.63856998987595  | 2.39446000212764  |
| C | 3.16945001179118  | 3.99031998903222  | 2.02518998504307  |

126

3b\_4 (TS1-1)

|   |                   |                   |                   |
|---|-------------------|-------------------|-------------------|
| C | -2.30037999801528 | -1.38535000000019 | 3.20475000148716  |
| H | -1.92425999997510 | -0.36431000109305 | 3.19273000043088  |
| C | -1.62777000035786 | -2.33689000262934 | 3.96356000229681  |
| H | 0.63240999768910  | -3.85485999756045 | 4.47593999900587  |
| H | -0.73252999726357 | -2.02173999788886 | 4.50258000188742  |
| C | -2.02294000246769 | -6.03531999969203 | 4.99041000213017  |
| H | -0.91498000106172 | -4.78612999928306 | 7.12010000204313  |
| C | -8.66787999895249 | 0.82162999824349  | 0.27332000164666  |
| C | 2.40809999545348  | -0.73060999998011 | -3.40031999907950 |
| H | -4.74491000002606 | -3.37567000076955 | 1.94064999919927  |
| C | -1.40585000245678 | -4.08844999881324 | 6.42482000013178  |
| H | -1.47975999793818 | -6.70111999969997 | 5.67645999993484  |
| H | -8.33051000201408 | -0.91681000157334 | 1.49252000034072  |
| H | -3.55657585090036 | -1.40956714114968 | -2.28320256216272 |

|   |                   |                   |                    |
|---|-------------------|-------------------|--------------------|
| H | -2.44460000160277 | -3.94403999933401 | 6.75532000158638   |
| C | -1.36057999824208 | -4.65086999765441 | 4.98782999860925   |
| H | -0.89059000127030 | -3.12092000217477 | 6.49546999941559   |
| C | 3.62341999970352  | -0.95937000039389 | -2.72525000086235  |
| C | 1.85374999945389  | -1.70216999658054 | -4.22477000170068  |
| H | 1.88124999958194  | 0.21391000086348  | -3.28266999850464  |
| H | -9.74660000153357 | 0.67027000228719  | 0.21374999947218   |
| H | 0.16900000177779  | -5.31849000212644 | 3.58070999736523   |
| H | -8.68886999821365 | 2.58382000039491  | -0.99729000203233  |
| C | -3.87697000020294 | -3.06367999903322 | 2.52459000014014   |
| C | 4.26687000013278  | 0.06791999998271  | -1.87476000192236  |
| C | 4.25038000243618  | -2.19872999870773 | -2.92940999821160  |
| C | 2.48168999749381  | -2.94065000162773 | -4.44014000089112  |
| H | 0.892580005750070 | -1.48705001338648 | -4.69425002856839  |
| H | -1.17136000031445 | 3.39906999885451  | -2.15176000255192  |
| C | -3.20461999811836 | -4.00820000013958 | 3.30097999800089   |
| H | 0.50307000212134  | 3.32400000041687  | 2.32592000047092   |
| C | 3.51922999637620  | 0.99815999998172  | -1.09713999949097  |
| C | 5.64694999906748  | 0.19579000047401  | -1.83470000166146  |
| C | 3.69719999700561  | -3.15939000001525 | -3.77734999795915  |
| H | 5.17652999867529  | -2.42872999777698 | -2.40067000237678  |
| C | 1.82098000119338  | -3.98248999940735 | -5.34584000173705  |
| C | -1.97639000485445 | 3.58384000078591  | -1.45721000091410  |
| O | 2.12786999430547  | 0.87162000050948  | -1.11042999574973  |
| C | 4.08384999831027  | 2.05128999879297  | -0.38811000035146  |
| H | 6.26096000260480  | -0.46878999745434 | -2.44406999911986  |
| C | 6.29437999849272  | 1.15960999904090  | -1.02880000206301  |
| H | 4.22566000290649  | -4.10435000051673 | -3.90119999923031  |
| C | 1.60576999727585  | -3.37025999995797 | -6.74553000058301  |
| C | 0.45649999951440  | -4.37949999873215 | -4.74473000008431  |
| C | 2.67553999960528  | -5.24831000202804 | -5.49851999900502  |
| C | -2.72059002433627 | 2.49514999360415  | -0.923809998968993 |
| C | -2.35520000000011 | 4.85129999857295  | -1.04403999840928  |
| P | 1.34917999213011  | 0.46058000546968  | 0.24368000172773   |
| C | 5.51179000098684  | 2.10443000104359  | -0.28544999777750  |
| C | 3.21600000148196  | 3.10087000103413  | 0.21078999876993   |
| C | 7.71064999760802  | 1.21148999792907  | -0.93754000020501  |
| H | 2.56352000030247  | -3.06864999917205 | -7.19437000151034  |
| H | 1.12970999969462  | -4.10731999775106 | -7.40930999932145  |
| H | 0.95584000047331  | -2.48579999827806 | -6.70457999845124  |
| H | -0.19848999987886 | -3.50932999844999 | -4.60317000102982  |
| H | -0.05727000218297 | -5.08818000039399 | -5.41145999742747  |
| H | 0.58106999731614  | -4.87039000304491 | -3.76896000027900  |
| H | 2.82697000057386  | -5.75976000168271 | -4.53625000274500  |
| H | 2.16454000234077  | -5.95599999794157 | -6.16659000020469  |
| H | 3.66126999872813  | -5.02729999812037 | -5.93423999828084  |
| O | -2.37450002128469 | 1.20710000590401  | -1.33766997944293  |
| C | -3.77315000640354 | 2.62553999774652  | -0.02941999621005  |
| H | -1.83197000093329 | 5.71948000069219  | -1.44956999805058  |
| C | -3.39688000027919 | 5.06336000175131  | -0.11094000174060  |
| O | 2.02468999659483  | 1.39223000215234  | 1.37154000317958   |
| N | -0.12939000119123 | 0.81610005167799  | -0.05477003947611  |
| N | 1.76150999344383  | -1.05275000155405 | 0.70704000312068   |
| C | 6.18380000151427  | 3.02938000239161  | 0.55404999748463   |
| C | 3.35936000228004  | 4.48337999757201  | -0.14625000180208  |
| C | 2.18572000200530  | 2.75396999887298  | 1.06981999905217   |
| H | 8.29611000165758  | 0.49057000025315  | -1.51126000146615  |
| C | 8.33376000220300  | 2.13120000177434  | -0.12208999800228  |

|      |                   |                   |                   |
|------|-------------------|-------------------|-------------------|
| P    | -1.57372947118225 | 0.24778997505143  | -0.30653011478384 |
| C    | -4.45638001061401 | 1.41406999580833  | 0.49964999807066  |
| C    | -4.11789000205905 | 3.94234999843604  | 0.42238999876210  |
| C    | -3.72143000123540 | 6.37258000192005  | 0.33542000065227  |
| S    | 2.29906999867731  | -1.48318000180873 | 2.19977000123847  |
| H    | 1.47054999803457  | -2.11963000369879 | -0.08184999659551 |
| C    | 7.56086000159794  | 3.03926000009850  | 0.63711999765743  |
| H    | 5.59701000059719  | 3.72516999879011  | 1.15221000065893  |
| C    | 4.30342000022802  | 4.94440999794063  | -1.10059999859339 |
| C    | 2.46772999860442  | 5.44096999841938  | 0.44422999967424  |
| C    | 1.28290000166945  | 3.67492999929225  | 1.66780999815298  |
| H    | 9.42217999761845  | 2.15272999983841  | -0.05157000169067 |
| O    | -2.31995998490948 | 0.52587001087785  | 1.10271002086008  |
| N    | -1.78639058201518 | -1.25866002888418 | -0.78174980492725 |
| C    | -3.71251001550810 | 0.41012999063773  | 1.10770000468646  |
| C    | -5.87563000080848 | 1.24212000213090  | 0.41041999869880  |
| C    | -5.10352000067042 | 4.18926999984315  | 1.41392000252905  |
| H    | -3.17110999930414 | 7.21579000009960  | -0.08760000001989 |
| C    | -4.69395000165201 | 6.57773999991678  | 1.28929999791164  |
| O    | 2.29108000229864  | -2.93934999919684 | 2.20417999932966  |
| O    | 1.62492000041013  | -0.76016000208717 | 3.26643000152729  |
| H    | 8.05581999778315  | 3.74571000151190  | 1.30456000253962  |
| H    | 4.96773999750583  | 4.22799000159101  | -1.58013000221561 |
| C    | 4.38191999960568  | 6.28016000147745  | -1.43759999991492 |
| C    | 2.58685000026648  | 6.81094999901981  | 0.08738000027133  |
| C    | 1.46585999979244  | 5.01005000139250  | 1.34493000046643  |
| H    | -3.58359000189145 | -5.03002000106585 | 3.31526999982801  |
| S    | -2.23490999625798 | -1.70812001598219 | -2.25540010066108 |
| C    | -4.27803000398394 | -0.71730000510420 | 1.76718000185707  |
| C    | -6.47621000280080 | 0.11398999853038  | 1.06203999810276  |
| C    | -6.70833999886852 | 2.11695000061184  | -0.33343999914467 |
| C    | -5.38305000209696 | 5.47229000243399  | 1.83791000109756  |
| H    | -5.63992999766751 | 3.34840999788692  | 1.84993999756387  |
| H    | -4.92811000119728 | 7.58796000254929  | 1.62782999852253  |
| H    | 5.11046000095426  | 6.60638999796617  | -2.18134999871287 |
| C    | 3.52309000258740  | 7.22638000018652  | -0.83378000210011 |
| H    | 1.90729000118017  | 7.52868000005005  | 0.55178000216355  |
| H    | 0.81228999984484  | 5.75778000026140  | 1.79834000298492  |
| H    | -2.00252999737657 | -6.49959999998548 | 3.99328999825032  |
| H    | 3.57183999832611  | -1.03165999678467 | 2.14164000088489  |
| O    | -1.61410006071477 | -0.93410000132650 | -3.32872995739472 |
| O    | -2.11086980907772 | -3.16802996164781 | -2.31305002275417 |
| C    | -5.66110999934392 | -0.81380000321692 | 1.74995000106822  |
| C    | -3.46065999925303 | -1.72403999783227 | 2.48250999854840  |
| C    | -7.88411000005561 | -0.05689000014097 | 0.98959999889991  |
| C    | -8.07057999899100 | 1.90945000204682  | -0.40339000259860 |
| H    | -6.25611999935041 | 2.95037999953477  | -0.86923000135931 |
| H    | -6.14034000019094 | 5.63291999766229  | 2.60680999850605  |
| H    | 3.59820999883256  | 8.28041000181971  | -1.10446999825202 |
| H    | -3.06826999740792 | -5.98747999876003 | 5.32867000103127  |
| C    | 0.10996000227642  | -4.81721000021958 | 4.55724999798377  |
| H    | 0.64956999744786  | -5.43953999760192 | 5.28720999867142  |
| C    | -2.07555000136052 | -3.66527000172708 | 4.05711999858658  |
| H    | -6.14426999905615 | -1.63621000188837 | 2.27916000242696  |
| 126  |                   |                   |                   |
| 3b_4 | (TS1-1')          |                   |                   |
| C    | -5.66540000056467 | -1.57104000253432 | 2.56929000018497  |
| C    | -5.78232000079431 | -2.92722999951843 | 2.85674000210048  |

|   |                   |                   |                   |
|---|-------------------|-------------------|-------------------|
| H | -8.19273000055075 | 2.51891999797100  | 0.81793000087137  |
| H | -6.20283000261766 | -0.84316999768318 | 3.18029000162473  |
| H | -6.82006000163423 | -6.87530000076818 | 2.56350999915788  |
| C | -4.79483000066449 | -5.59785000064840 | 3.93204999743356  |
| H | -6.41834999900656 | -3.22961000031424 | 3.69091999900227  |
| C | -4.28967999889870 | -3.44937999913239 | 1.06069999977925  |
| C | 4.08321999062278  | -1.92355998892124 | -3.26974999621812 |
| C | -4.35302000237269 | -6.27206000236436 | 1.57077000034758  |
| H | -6.14995999747779 | 6.10531999991980  | -0.42639999832362 |
| C | -5.09410000071143 | -3.90112999853269 | 2.11275000028371  |
| H | -3.73735000173851 | -4.15380999877081 | 0.43924000162892  |
| C | -4.15701999808542 | -2.09055000058722 | 0.77818999963972  |
| C | -5.22899999770382 | -5.38436999803486 | 2.46720999747488  |
| H | -3.52015671472549 | -0.14843287472646 | -2.73909567393208 |
| H | -7.03166000167042 | -5.67497000093026 | 1.26183000128969  |
| C | 3.48302999901320  | -0.76144998580133 | -2.75979999591494 |
| C | 3.47794999913893  | -2.66679999585483 | -4.28399999843465 |
| H | 5.03823999901036  | -2.25957000015746 | -2.86222000440248 |
| H | -4.47955999976507 | -7.32461000117424 | 1.86413000103301  |
| C | -6.70089999956299 | -5.81293999845248 | 2.30131000041208  |
| H | -3.51264000169472 | -1.79052000155867 | -0.04495000030816 |
| C | -7.31501000168595 | 4.38749000216873  | 0.21214999966148  |
| C | 4.19490999700220  | 0.04851000896415  | -1.74698999769868 |
| C | 2.23232008243968  | -0.39329016960595 | -3.28750008432098 |
| C | 2.24661999762605  | -2.28414998810447 | -4.83324999157513 |
| H | 3.98699000221665  | -3.55980000144119 | -4.64607000246958 |
| H | 0.47494071576566  | 3.35584820268969  | -1.44367726071073 |
| H | -4.62904999987927 | -6.18226000068303 | 0.51042999971204  |
| H | -7.36840000255074 | -5.22688999887642 | 2.94872000232346  |
| C | 3.52788000225724  | 0.71426999889823  | -0.68196999205529 |
| C | 5.57281000238472  | 0.18946000102387  | -1.79558000237846 |
| C | 1.63722000329987  | -1.13703999773846 | -4.29920999382023 |
| H | 1.72657988202225  | 0.50055024698355  | -2.93365987919941 |
| C | 1.56144999825624  | -3.04417999548961 | -5.97197999895423 |
| C | -0.19587979295870 | 3.64597948799028  | -0.64962020965711 |
| O | 2.13007000432139  | 0.62617999397351  | -0.63818000073926 |
| C | 4.16706001364288  | 1.45026998773944  | 0.30793001907459  |
| H | 6.12395000220084  | -0.25828999896475 | -2.62352000201319 |
| C | 6.29849000089794  | 0.87567999926509  | -0.79580000280714 |
| H | 0.66401999513832  | -0.80757999327639 | -4.66437000361978 |
| C | 2.38396999960079  | -4.24942000095124 | -6.44639999995082 |
| C | 1.36609999952388  | -2.08457999748089 | -7.16469999881746 |
| C | 0.18449999940588  | -3.54756999929467 | -5.49516999988948 |
| C | -1.31615013529845 | 2.82643030360430  | -0.32581978296216 |
| C | -0.00144009562817 | 4.76508025994899  | 0.14459012161708  |
| P | 1.50029996709216  | -0.35086000921417 | 0.48106999624880  |
| C | 5.60015000257314  | 1.48905999639800  | 0.29725000076613  |
| C | 3.36524998856585  | 2.16518004386776  | 1.33682996145097  |
| C | 7.71678999809006  | 0.93779000118562  | -0.83341000218370 |
| H | 2.53340000112479  | -4.98322999915775 | -5.64042000005083 |
| H | 1.85369999762546  | -4.75767999901096 | -7.26451999808880 |
| H | 3.37130999868723  | -3.94669999880522 | -6.82495000168260 |
| H | 0.87952000031335  | -2.61169999802779 | -7.99917000110065 |
| H | 0.73482999750967  | -1.22787000159687 | -6.89262000242981 |
| H | 2.33290000118126  | -1.69693000127693 | -7.51770000208239 |
| H | 0.30356000250127  | -4.27188000210201 | -4.67592999970341 |
| H | -0.45484999846620 | -2.73153000195880 | -5.13234000237621 |
| H | -0.34198999986960 | -4.05324000297701 | -6.31883000182238 |

|   |                   |                   |                   |
|---|-------------------|-------------------|-------------------|
| O | -1.47088994898565 | 1.62715994033848  | -1.03258008368147 |
| C | -2.28753004251090 | 3.16926998393751  | 0.60167985573094  |
| H | 0.83561999973700  | 5.43146996443732  | -0.07041002629336 |
| C | -0.86288004185671 | 5.08933006901082  | 1.21802995555246  |
| O | 2.23271007050582  | 0.11341001968516  | 1.83955001152702  |
| N | -0.03200000211378 | -0.10731999401489 | 0.49277000113969  |
| N | 2.03609002214640  | -1.87563999094237 | 0.24307999520749  |
| C | 6.36228999658471  | 2.07526000154054  | 1.34020999794281  |
| C | 3.51360999141399  | 3.57588000062774  | 1.55943999701475  |
| C | 2.39355989448677  | 1.49062994503607  | 2.06565000140882  |
| H | 8.23546000160663  | 0.47306999829424  | -1.67405999856282 |
| C | 8.42629999875622  | 1.54030999952919  | 0.18273999805729  |
| P | -1.38527998853233 | 0.21389999528239  | -0.24380001518315 |
| C | -3.56438996820177 | 2.41321996323563  | 0.69319003972964  |
| C | -2.03848994576601 | 4.30094993667817  | 1.44731003674207  |
| C | -0.59653997937698 | 6.19774997031086  | 2.06473000812825  |
| S | 2.78231998015526  | -2.84892001561223 | 1.35203000289775  |
| H | 1.32231999501561  | -2.60769000056469 | -0.64104999922090 |
| C | 7.74077000181105  | 2.09929999990643  | 1.28491999691164  |
| H | 5.84664999944163  | 2.49751000166537  | 2.20116000194794  |
| C | 4.37658999462031  | 4.39742999797764  | 0.78573000061535  |
| C | 2.71270006588414  | 4.20203999405769  | 2.57138000397875  |
| C | 1.54784005017466  | 2.09509004470562  | 3.03545995296310  |
| H | 9.51623000148746  | 1.57034000108001  | 0.14768000260897  |
| O | -2.37639999527771 | 0.36349000407544  | 1.03169001842384  |
| N | -1.89255002424613 | -0.91140999786361 | -1.24305998751504 |
| C | -3.59185000319496 | 1.04368000094422  | 0.92565000433472  |
| C | -4.81134999616049 | 3.10789000496967  | 0.53388000445799  |
| C | -2.87588998445137 | 4.63825998922410  | 2.54261001692341  |
| H | 0.29611000956445  | 6.79473999388906  | 1.86909000621232  |
| C | -1.43085998249667 | 6.50046997429408  | 3.11890001733657  |
| O | 2.85942000235159  | -4.15070999536999 | 0.70470999762119  |
| O | 2.20164000804952  | -2.71711999427391 | 2.67824999916520  |
| H | 8.30517999853627  | 2.54144000178993  | 2.10681000225096  |
| H | 4.95914000693655  | 3.94859999726933  | -0.01711999350491 |
| C | 4.47647999610351  | 5.75228000258209  | 1.02625999706652  |
| C | 2.86108997675621  | 5.59410000835590  | 2.81324999279043  |
| C | 1.75867997778604  | 3.44213995080137  | 3.28378011609355  |
| H | 0.80186059333219  | 1.50592046227726  | 3.54617520888219  |
| S | -2.36599998837643 | -0.85884000113280 | -2.76904000227595 |
| C | -4.79429999815745 | 0.32097000343998  | 1.19004000063467  |
| C | -6.03216999903437 | 2.40101999964617  | 0.78379000180528  |
| C | -4.89193000327548 | 4.45440000147834  | 0.09311000105853  |
| C | -2.57434000822661 | 5.70547001005183  | 3.36354999735875  |
| H | -3.75588000549401 | 4.02842000699108  | 2.74362999252742  |
| H | -1.21062000924034 | 7.34926001367737  | 3.76812999061204  |
| H | 5.14048999717493  | 6.36127999966134  | 0.41116000090057  |
| C | 3.72569999362274  | 6.35731000194442  | 2.06018999046179  |
| H | 2.25710999160626  | 6.04812000561000  | 3.60120999319401  |
| H | 1.14971999432759  | 3.94343001238236  | 4.03790994943429  |
| H | -8.27339000033386 | 4.89252999911360  | 0.08353999996678  |
| H | -5.41358999929451 | -5.01659000202780 | 4.62986000084420  |
| O | -1.45410000215292 | -0.12194999699069 | -3.63945000036557 |
| O | -2.70739999519371 | -2.23646000031359 | -3.14521999954130 |
| C | -5.98048000029237 | 1.03599000118327  | 1.14254000132625  |
| C | -4.84004999719532 | -1.12203999920975 | 1.52262999754588  |
| C | -7.27250000089912 | 3.07392000061464  | 0.62583000083627  |
| C | -6.11285000158166 | 5.07650000055137  | -0.06595000198446 |

|               |                   |                   |                    |
|---------------|-------------------|-------------------|--------------------|
| H             | -3.97601999860535 | 4.99293000202441  | -0.14453000000247  |
| H             | -3.22308000649373 | 5.93598000742410  | 4.20980999857584   |
| H             | 3.82546001112192  | 7.42684999859638  | 2.25086001036782   |
| H             | -3.28731000142907 | -6.02001999962047 | 1.66762999856338   |
| H             | 4.00013773781635  | -2.26182605390236 | 1.36222548668138   |
| H             | -3.74749000020513 | -5.29552000174636 | 4.07263999891333   |
| H             | -4.88678000173416 | -6.66056000076691 | 4.20320000205979   |
| H             | -6.91792000192657 | 0.50730999672141  | 1.32329999696892   |
| 126           |                   |                   |                    |
| 3b_4 (TS1-2') |                   |                   |                    |
| C             | -6.13794999801448 | 1.64381999818290  | 4.23942999793042   |
| H             | -6.21966000176910 | 3.50848000265154  | -4.078600000000057 |
| H             | -6.32252000200267 | 0.30772000214675  | 5.93471999919723   |
| C             | -5.70016000024481 | 2.81259000158140  | 5.14402999752568   |
| C             | -4.17641999992521 | 0.75688000183525  | 1.04052999792785   |
| H             | -4.61538999935020 | 2.78572000222299  | 5.31525999969100   |
| H             | -6.04998000214563 | 3.79021000003344  | 2.52479999853449   |
| H             | -5.58126999998160 | 3.66349999984571  | -6.47598000054856  |
| C             | 1.60213003243036  | -4.26886014933219 | -0.07599990565743  |
| H             | -6.15145999800497 | -0.54849999765004 | 4.38650000187896   |
| H             | -5.95190000185887 | 3.78803000154383  | 4.70552999737800   |
| H             | -5.06285999767576 | 3.94467000078889  | 0.28761999962866   |
| H             | -8.19398000168059 | 1.65758000260759  | 4.97712000229478   |
| H             | -4.61832000055170 | -0.26825000237733 | 2.85699999755814   |
| H             | -3.64413999821306 | -0.10630000098787 | 0.64591999760019   |
| H             | -3.72107237450367 | -2.16684932543409 | -1.71992089002055  |
| H             | -3.31559999980568 | 2.91124000078868  | -7.20879000138129  |
| C             | 2.70251999067110  | -4.14101996762403 | 0.78669997547876   |
| C             | 0.53255999806787  | -5.10448995929462 | 0.24001998253430   |
| H             | 1.57603998256741  | -3.72213984596760 | -1.01547013324691  |
| H             | -7.94922000090657 | 2.66372000134978  | 3.52798000214150   |
| H             | -4.73419999830800 | 0.22090999987365  | 5.13442000183675   |
| C             | -4.97855999965143 | 3.01027000019531  | 0.84630999752744   |
| H             | -6.20611000159895 | 2.74406000262292  | 6.11894000005168   |
| C             | 3.85530000255627  | -3.25813000521197 | 0.50523999773624   |
| C             | 2.67924998252121  | -4.87874998684543 | 1.98253000401195   |
| C             | 0.51043999761193  | -5.85470997785012 | 1.42543000360435   |
| H             | -0.30363000112410 | -5.14352001059417 | -0.45732000234863  |
| H             | 1.48090294254384  | -1.16142938476549 | -3.47984485279670  |
| H             | -8.00479000024337 | 0.89365000022179  | 3.37620999967466   |
| H             | 2.92251869092317  | 0.31862934101880  | 3.40246448420290   |
| C             | 3.69309000313773  | -1.95345000123704 | -0.03119000013649  |
| C             | 5.14636999757776  | -3.62619000157301 | 0.84130000228015   |
| C             | 1.61192000113438  | -5.71943000316860 | 2.28694999940027   |
| H             | 3.48955000333363  | -4.75381000472933 | 2.70228999612890   |
| C             | -0.63011999719571 | -6.82735000234126 | 1.74463000177531   |
| C             | 1.14042010686351  | -0.14311021146168 | -3.58691947287493  |
| O             | 2.39432999780548  | -1.56215000387248 | -0.39035999844549  |
| C             | 4.71214999427610  | -1.02994000031200 | -0.19509000247733  |
| H             | 5.32995000168292  | -4.63145999991492 | 1.22499000151648   |
| C             | 6.23094999699869  | -2.72164999809834 | 0.76693000012711   |
| H             | 1.63990000335420  | -6.26807000426963 | 3.22904000200458   |
| C             | -0.94767000161360 | -6.83760000062667 | 3.25176999961234   |
| C             | -0.17751999784103 | -8.24200999985981 | 1.32223999736565   |
| C             | -1.91752999746547 | -6.46887000339839 | 0.98501000047415   |
| C             | -0.12971005993611 | 0.24904018163923  | -3.0719903407802   |
| C             | 1.89622984153226  | 0.86083009378737  | -4.17628054419869  |
| P             | 1.65707999259779  | -0.56989997930150 | 0.63555000715960   |

|   |                   |                   |                   |
|---|-------------------|-------------------|-------------------|
| C | 6.01843999920393  | -1.38760999887901 | 0.28180999921367  |
| C | 4.44576000602640  | 0.29102000411364  | -0.82131999332282 |
| C | 7.52503000038902  | -3.09441000229416 | 1.21730999915120  |
| H | -0.10651000017570 | -7.20514999855968 | 3.85496000156323  |
| H | -1.20708999960936 | -5.83038999680269 | 3.60925000039579  |
| H | -1.80524999911427 | -7.49798000046932 | 3.44677000181900  |
| H | 0.04112000084431  | -8.27428000225352 | 0.24517000219482  |
| H | 0.73147999836411  | -8.54368999857149 | 1.86260000203558  |
| H | -0.96822000163750 | -8.97764000062380 | 1.53631000145476  |
| H | -2.24874000153390 | -5.44161999738225 | 1.19210999905821  |
| H | -1.79848000166014 | -6.56055000150799 | -0.10276999739440 |
| H | -2.72419999832669 | -7.15356999966947 | 1.28508000032706  |
| O | -0.88409001126281 | -0.70437008754915 | -2.36140997004783 |
| C | -0.67990000462360 | 1.51095993364832  | -3.23581989988187 |
| H | 2.86617003412667  | 0.61102999142435  | -4.60903986973821 |
| C | 1.46304000094049  | 2.20430997637770  | -4.23727998866228 |
| O | 2.62032999250857  | 0.72451999561294  | 0.69832999380633  |
| N | 0.25154000191227  | -0.27336001064435 | 0.05356999399563  |
| N | 1.56953000929909  | -1.07841002223120 | 2.17240999295768  |
| C | 7.09578999787889  | -0.46666000120846 | 0.34442999922498  |
| C | 5.23803999665908  | 0.74008999472122  | -1.93346000339229 |
| C | 3.43599001262123  | 1.13158000420801  | -0.36493999714062 |
| H | 7.67661999784422  | -4.11592000053030 | 1.57216000040122  |
| C | 8.55843999823411  | -2.18339999969213 | 1.23905000152632  |
| P | -1.07004998111602 | -0.46157999972834 | -0.77125998259125 |
| C | -2.09488998589116 | 1.78543001889253  | -2.87338998355433 |
| C | 0.15453006330540  | 2.54927001533779  | -3.76621988125184 |
| C | 2.30303005701614  | 3.22459000687975  | -4.75722987094454 |
| S | 2.63693999701903  | -1.00261999233510 | 3.43172000163736  |
| H | 0.41643999704191  | -1.73468999804824 | 2.51310000290356  |
| C | 8.33318999918364  | -0.85390999862779 | 0.81673000172146  |
| H | 6.93529000042725  | 0.56361000184702  | 0.03036999830428  |
| C | 6.14673000451471  | -0.11036999658124 | -2.61729999677729 |
| C | 5.07402999523590  | 2.08031999866902  | -2.41292000430911 |
| C | 3.25254000265831  | 2.46695000238868  | -0.82616999369660 |
| H | 9.54398999731505  | -2.47934999982113 | 1.60123000176437  |
| O | -1.69606999454642 | 1.03549000482995  | -0.63841999736143 |
| N | -2.07138002701058 | -1.53578997960524 | -0.18675001528287 |
| C | -2.56671999779814 | 1.57135000338828  | -1.58576000153644 |
| C | -3.00095999988206 | 2.30276000266698  | -3.85850000477011 |
| C | -0.23469001509756 | 3.91317999738989  | -3.78199004042228 |
| H | 3.29185999693300  | 2.94396000086018  | -5.12549000964825 |
| C | 1.89158998394459  | 4.53924999204324  | -4.76922003527221 |
| O | 3.86045999896774  | -1.73785000108675 | 3.16024000176914  |
| O | 1.83602999783258  | -1.33215000045690 | 4.60200000152290  |
| H | 9.14123000140305  | -0.12309000001262 | 0.87167000072839  |
| H | 6.25754999829694  | -1.14209000057957 | -2.28635000358102 |
| C | 6.87300000213361  | 0.34579000054621  | -3.69802000019409 |
| C | 5.85464000181949  | 2.52716999899051  | -3.51194999853726 |
| C | 4.10728999232145  | 2.91917999576754  | -1.81503000765323 |
| H | 2.46723429396866  | 3.07710962082426  | -0.40622343390981 |
| S | -2.88109998682143 | -2.75306001275520 | -0.83217999009667 |
| C | -3.84554999741056 | 2.01296000114600  | -1.13627999953028 |
| C | -4.31055000340362 | 2.71096999770645  | -3.44319000234138 |
| C | -2.67154000383579 | 2.39074999507352  | -5.23569000010147 |
| C | 0.61768999950847  | 4.88527000085694  | -4.26192000390145 |
| H | -1.21028001310954 | 4.19184999650046  | -3.38629001726274 |
| H | 2.54995999332918  | 5.31728999695503  | -5.15903001565412 |

|            |                   |                   |                   |
|------------|-------------------|-------------------|-------------------|
| H          | 7.55444999796884  | -0.33170000100598 | -4.21452000270336 |
| C          | 6.73899000203968  | 1.68050000171740  | -4.14394999732337 |
| H          | 5.72657000025428  | 3.55631999730926  | -3.85420999935545 |
| H          | 3.97710000551442  | 3.93244000428898  | -2.19814999456939 |
| C          | -5.44405000031407 | 1.73914000080745  | 2.87736000068716  |
| C          | -5.53092000070691 | 2.91962999880306  | 2.11955999766780  |
| O          | -2.04022000249252 | -3.66405999608165 | -1.60098000637884 |
| O          | -3.70741999599050 | -3.31200000246788 | 0.24529999906872  |
| C          | -4.67609999805735 | 2.59114999724892  | -2.08377999825235 |
| C          | -4.30456000191684 | 1.91858000084629  | 0.26873999929501  |
| C          | -5.22395999846018 | 3.20724999634137  | -4.41041000108588 |
| C          | -3.58403000273573 | 2.87012999940505  | -6.15233999873949 |
| H          | -1.69207000005767 | 2.05302000195977  | -5.57091000136329 |
| H          | 0.30695000728427  | 5.93097000209414  | -4.24617998893146 |
| H          | 7.32713999570165  | 2.03224000011498  | -4.99271000359242 |
| C          | -5.81417000208479 | 0.32660999862181  | 4.95941999836278  |
| C          | -4.86932000096839 | 3.28845999826066  | -5.73939999839288 |
| C          | -7.66298000014965 | 1.72068999927214  | 4.01486999825425  |
| C          | -4.74098999803586 | 0.66816999956427  | 2.31311000129402  |
| H          | -5.67264000178857 | 2.91600999836576  | -1.78023999853085 |
| 102        |                   |                   |                   |
| 3b_5 (cat) |                   |                   |                   |
| H          | 0.83586000199111  | -5.83991000173270 | 1.29773999825967  |
| H          | -5.37322994287511 | 2.05756004166397  | -0.22900995998877 |
| H          | -3.88429807313255 | 3.57301712250496  | -3.97762351136187 |
| H          | 5.88614000217293  | -7.30862000163624 | -1.47566000174185 |
| H          | -5.28610982287517 | 3.82625000336274  | -1.90383987359691 |
| C          | -4.77977005220027 | 1.89882986279005  | -1.13001002319170 |
| H          | 1.17062999761299  | -3.39937000111421 | 1.78822000138320  |
| C          | -3.26419993270446 | 0.57659002294265  | -2.43855985262479 |
| C          | -4.72110035791889 | 2.91275007683380  | -2.08504034270111 |
| C          | -3.93565000013086 | 2.78636983055249  | -3.23810983445819 |
| C          | -3.21494963837623 | 1.59119031104259  | -3.38690002546308 |
| C          | 0.21410999890661  | -3.80057999970630 | 1.49078000230246  |
| C          | 0.00385999856955  | -5.13986000173042 | 1.19958000231787  |
| C          | -1.25098000056445 | -5.63645000131689 | 0.77498000060805  |
| C          | -1.41871999965619 | -7.00242999899889 | 0.42255000112582  |
| C          | -2.62643000004625 | -7.47151000168032 | -0.04642000156477 |
| C          | -3.72117000118377 | -6.58703999831845 | -0.18108000090080 |
| C          | -3.59717000151994 | -5.25799999880271 | 0.16882999848584  |
| C          | -2.37045999911029 | -4.74485000156596 | 0.66549999914012  |
| C          | -2.18320000233527 | -3.36683000008334 | 1.00670000053912  |
| C          | -0.91758000184597 | -2.94597000042494 | 1.37970999798610  |
| O          | -0.75089999766151 | -1.58188000162358 | 1.64662999839576  |
| P          | -0.68401999951542 | -0.59113000011628 | 0.36668000130997  |
| N          | -0.93474000213369 | 0.90381000170383  | 0.82917000086083  |
| S          | -0.65496000032577 | 1.46620000130045  | 2.31421999809618  |
| O          | -0.73286999907488 | 2.92170999843228  | 2.24804000102969  |
| O          | 0.51072000429065  | 0.85800000161618  | 2.95701000327464  |
| C          | 4.39843000031299  | 2.01494999821511  | 0.37809999911903  |
| H          | 3.75503998993512  | 0.62660999727028  | 1.91116999755028  |
| C          | -4.68084000163272 | -3.47850999769608 | 2.63580999977241  |
| C          | -6.92161999835352 | -2.65479999979451 | 3.06965000169450  |
| C          | -5.85993999942922 | -3.54590000103770 | 3.34896999959264  |
| O          | 3.13487000232815  | -0.46195999712740 | -0.21738000208826 |
| H          | 2.70194998288446  | 2.31522999616784  | 3.31195999317896  |
| C          | -4.05547001039803 | 0.70639999183300  | -1.28257000196520 |
| O          | -1.88954000030223 | -1.10326999861255 | -0.58293999862532 |



|   |                   |                   |                   |
|---|-------------------|-------------------|-------------------|
| C | -4.18919999482345 | -0.37805999655889 | -0.28381999944254 |
| C | -5.56817000158387 | -1.58425999806769 | 1.35374999658186  |
| C | -5.39176999366615 | -0.57661998059710 | 0.37927001685896  |
| C | -4.50320000196136 | -2.50726999799002 | 1.61734000246296  |
| C | -3.13795000768321 | -1.28839001232081 | 0.02786998188915  |
| C | -6.77716000215415 | -1.69605000032870 | 2.09030999731665  |
| C | -3.28483999840106 | -2.37625000179737 | 0.87928999846716  |
| C | 3.18859002364302  | 2.63857000646110  | 2.39446001564561  |
| N | 0.59804000169409  | -0.97145999998225 | -0.49359999946581 |
| P | 1.81167999832609  | -0.24308000105436 | -1.10150000163750 |
| N | 1.75215999690242  | 1.41528999942079  | -1.30400000169529 |
| S | 0.95366999659216  | 2.16173999888188  | -2.59887999863074 |
| O | -0.13264993558475 | 1.26476999773340  | -2.93607996869054 |
| O | 1.94282999593467  | 2.56891999846654  | -3.57843000001135 |
| H | 0.47236999715381  | 3.25080000123333  | -1.95860999825754 |
| C | 4.37342998588472  | 3.37069999761118  | -0.00672000884123 |
| H | 9.43319000042390  | 0.09568000183181  | -4.23744000053795 |
| H | 6.01408000134374  | -2.48043999915697 | -3.83953999985798 |
| C | 7.76275000206312  | -1.28032999944313 | -4.14386000142932 |
| H | 3.75809001549303  | 5.36763000358368  | 0.45897000547245  |
| H | 2.67994024496636  | 4.73165080521294  | 2.63937574818293  |
| H | 6.79534000182581  | 2.16644000217923  | -0.87297999954908 |
| H | -1.73750000158868 | 1.04910999771770  | 3.01213000009248  |
| C | 6.57636000101762  | -1.60423000222687 | -3.51933999885550 |
| C | 3.78359001526082  | 1.66780000434285  | 1.59158000888194  |
| H | 8.13314000061743  | -1.90620000186418 | -4.95699000074403 |
| C | 3.16945000323125  | 3.99032000227239  | 2.02519000041117  |
| C | 6.06735000071266  | -0.80503000024401 | -2.46268000237146 |
| H | 4.81604000890548  | 3.66402000192264  | -0.96133999438796 |
| H | 8.56146000181571  | 1.57172000044349  | -2.44752000146187 |
| C | 3.76858997309596  | 4.33097999418017  | 0.80008998432056  |
| H | 2.56957999996751  | 1.93409000045665  | -0.94894000190535 |
| O | 2.20455000045016  | -0.86058000190790 | -2.53797999825619 |
| C | 2.71400999773217  | -2.18009000134813 | -2.46265999957702 |
| C | 4.04334000198609  | -2.32257000161104 | -2.08783999910943 |
| C | 4.57381000061825  | -3.64340000194787 | -1.93365000043352 |
| C | 5.88490000233068  | -3.89940999796678 | -1.45339999835645 |
| C | 6.34146000041514  | -5.19102999842953 | -1.29079000190768 |
| C | 5.51136000238131  | -6.29221999765528 | -1.60361000230826 |
| C | 4.22883999770362  | -6.07785999979019 | -2.05821000201344 |
| C | 3.72150000128905  | -4.76054000022870 | -2.22047000066550 |
| C | 2.38508000173380  | -4.53627000034442 | -2.62187000066987 |
| C | 1.83752999986839  | -3.26588999888858 | -2.73055999890294 |
| H | 0.80878000088866  | -3.08367999987636 | -2.99968000062844 |
| C | 8.49931999751837  | -0.14132999753345 | -3.74512000081326 |
| C | 6.78779999947561  | 0.38108000214141  | -2.09557999839303 |
| H | 7.35029999888117  | -5.36348999893050 | -0.91294000177863 |
| C | 4.36894000204742  | -0.19738999880847 | -0.85309000226602 |
| H | 6.53259000254795  | -3.06034999791791 | -1.20374999806107 |
| H | 1.75479999998052  | -5.39903000048909 | -2.84527999786181 |
| C | 5.02715999888077  | 1.01551999806292  | -0.51570000166629 |
| H | -4.67200000122265 | -6.95709000051260 | -0.56760999961575 |
| H | -3.86202999939738 | -4.15828000088855 | 2.86885000054922  |
| H | -7.84941999996057 | -2.71999000156706 | 3.63982999793980  |
| H | -7.58139999935868 | -0.98772999822620 | 1.88250999721229  |
| H | -0.56222999770798 | -7.67307999804953 | 0.52027000218719  |
| H | -2.73901000101906 | -8.52143000033674 | -0.32035999774536 |
| H | -5.96823999920087 | -4.28470999826281 | 4.14412000206794  |

|   |                   |                   |                   |
|---|-------------------|-------------------|-------------------|
| H | 3.57260999824363  | -6.91953999856241 | -2.28938000186199 |
| H | -4.44671000164095 | -4.58554999822779 | 0.05819999949423  |
| H | -6.23703000164197 | 0.07337999644610  | 0.14973999789247  |
| C | 8.01576000242630  | 0.67436999853395  | -2.74621999830770 |
| H | -2.57613023865033 | 1.44568989159824  | -4.25899006155222 |
| H | -2.67631006186975 | -0.32323003543018 | -2.60376005128241 |
| C | 6.24496000201728  | 1.25895000152772  | -1.1289899998908  |
| C | 4.84322000145764  | -1.10947999900377 | -1.78278999835789 |

102

3b\_5 (TS1-1)

|   |                   |                   |                   |
|---|-------------------|-------------------|-------------------|
| C | -2.30038003909945 | -1.38534998290798 | 3.20475006105602  |
| H | -1.92425997693424 | -0.36431001262571 | 3.19272996773912  |
| C | -1.62777007881329 | -2.33688996784289 | 3.96356010609144  |
| C | -5.66110999824971 | -0.81379999841564 | 1.74995000532266  |
| H | -0.73252994100054 | -2.02174000680986 | 4.50257993947881  |
| C | -2.07555000250054 | -3.66527000346298 | 4.05712000138578  |
| C | -3.46065999854893 | -1.72403999909031 | 2.48250999816625  |
| C | -8.66787999906861 | 0.82162999795357  | 0.27332000127136  |
| C | 2.40810000039807  | -0.73061002220613 | -3.40031985927539 |
| H | -4.74491002357614 | -3.37566999244169 | 1.94065003101619  |
| H | 3.59820999872923  | 8.28041000182106  | -1.10446999839091 |
| H | -6.14426999852396 | -1.63621000035721 | 2.27916000383627  |
| H | -8.33051000215680 | -0.91681000181817 | 1.49252000009716  |
| H | -3.55657999654591 | -1.40957000096270 | -2.28320000196701 |
| H | -6.14034000050080 | 5.63291999773208  | 2.60680999826298  |
| H | -1.55175310714614 | -4.39561533855804 | 4.65706954641806  |
| H | -6.25611999950415 | 2.95037999949150  | -0.86923000134514 |
| C | 3.62341999488128  | -0.95937000814619 | -2.72524998408568 |
| C | 1.85374964964304  | -1.70217028496727 | -4.22476982559500 |
| H | 1.88125003660406  | 0.21391003467559  | -3.28267007352521 |
| H | -9.74660000165055 | 0.67027000219965  | 0.21374999935584  |
| C | -7.88411000014670 | -0.05689000010364 | 0.98959999889637  |
| H | -8.68886999829564 | 2.58382000039482  | -0.99729000199701 |
| C | -3.87696995882485 | -3.06368001232833 | 2.52458994058857  |
| C | 4.26686999962083  | 0.06792000502700  | -1.87476000540429 |
| C | 4.25038007528287  | -2.19872985841675 | -2.92941008364877 |
| C | 2.48169009205318  | -2.94064984259474 | -4.44013988296142 |
| H | 0.89258019860860  | -1.48704991121966 | -4.69425013926681 |
| H | -1.17135999948041 | 3.39907000231772  | -2.15176000152603 |
| C | -3.20461991751937 | -4.00820003271992 | 3.30097988978155  |
| H | 0.50307000273053  | 3.32400000121156  | 2.3259199999030   |
| C | 3.51922999806156  | 0.99816001602178  | -1.09714001990557 |
| C | 5.64694999915466  | 0.19578998176375  | -1.83469998112159 |
| C | 3.69720014448772  | -3.15939006698109 | -3.77735043091132 |
| H | 5.17652995709835  | -2.42873004305927 | -2.40066993301453 |
| H | 2.03878538760045  | -3.69262603385015 | -5.07672883578432 |
| C | -1.97638999882502 | 3.58384000182310  | -1.45720999984223 |
| O | 2.12787000050777  | 0.87161999812686  | -1.11042999981395 |
| C | 4.08384999908808  | 2.05128999909574  | -0.38811000099770 |
| H | 6.26096000276896  | -0.46878999643329 | -2.44407000066184 |
| C | 6.29437999798287  | 1.15960999724077  | -1.02880000055388 |
| H | 4.22565990449568  | -4.10435000849554 | -3.90119981140453 |
| H | 1.90729000106423  | 7.52868000005207  | 0.55178000199399  |
| H | -5.63992999760364 | 3.34840999784403  | 1.84993999776725  |
| H | 3.57183999903492  | -1.03165999821301 | 2.14164000072617  |
| C | -2.72058999891523 | 2.49514999853255  | -0.92381000004152 |
| C | -2.35519999993298 | 4.85129999825816  | -1.04403999829374 |
| P | 1.34918000245966  | 0.46057999809840  | 0.24367999822968  |

|      |                   |                   |                   |
|------|-------------------|-------------------|-------------------|
| C    | 5.51179000115979  | 2.10443000130927  | -0.28544999782681 |
| C    | 3.21600000170900  | 3.10087000105409  | 0.21078999961030  |
| C    | 7.71064999746297  | 1.21148999886966  | -0.93754000143573 |
| H    | 0.81228999922298  | 5.75778000039433  | 1.79834000220911  |
| C    | 3.52309000261036  | 7.22638000021499  | -0.83378000212611 |
| H    | 5.11046000084644  | 6.60638999795871  | -2.18134999887076 |
| C    | -6.70833999829420 | 2.11695000046662  | -0.33343999881705 |
| H    | -4.92811000115835 | 7.58796000255301  | 1.62782999860411  |
| C    | -5.38305000252297 | 5.47229000243513  | 1.83791000064025  |
| O    | -2.11086999758465 | -3.16802999815921 | -2.31304999765163 |
| C    | -8.07057999900030 | 1.90945000191027  | -0.40339000253678 |
| O    | -1.61410005105122 | -0.93409998867037 | -3.32872996850547 |
| O    | -2.37449999724166 | 1.20710000208932  | -1.33767000126057 |
| C    | -3.77314999892876 | 2.62553999799314  | -0.02941999866989 |
| H    | -1.83197000242137 | 5.71948000069633  | -1.44956999919171 |
| C    | -3.39687999998521 | 5.06336000140054  | -0.11094000123833 |
| O    | 2.02469000222631  | 1.39223000231654  | 1.37153999941887  |
| N    | -0.12938999736891 | 0.81610000124639  | -0.05476999933662 |
| N    | 1.76150999897292  | -1.05275000101968 | 0.70704000230158  |
| C    | 6.18380000165975  | 3.02938000241049  | 0.55404999764595  |
| C    | 3.35936000262591  | 4.48337999761426  | -0.14625000135143 |
| C    | 2.18572000243007  | 2.75396999926552  | 1.06981999882927  |
| H    | 8.29611000166467  | 0.49057000061201  | -1.51126000186401 |
| C    | 8.33376000222969  | 2.13120000209157  | -0.12208999832757 |
| P    | -1.57373000050091 | 0.24779000087525  | -0.30652999880075 |
| C    | -4.45638000043462 | 1.41406999667497  | 0.49964999655842  |
| C    | -4.11789000006528 | 3.94234999793866  | 0.42238999940537  |
| C    | -3.72143000174667 | 6.37258000182296  | 0.33542000009527  |
| S    | 2.29906999714359  | -1.48318000191416 | 2.19977000230844  |
| H    | 1.47055000202582  | -2.11963000263237 | -0.08184999806496 |
| C    | 7.56086000166600  | 3.03926000002115  | 0.63711999784784  |
| H    | 5.59701000063400  | 3.72516999858519  | 1.15221000099467  |
| C    | 4.30342000041214  | 4.94440999792508  | -1.10059999833978 |
| C    | 2.46772999869044  | 5.44096999840339  | 0.44422999984963  |
| C    | 1.28290000120282  | 3.67492999890901  | 1.66780999845304  |
| H    | 9.42217999765364  | 2.15272999963113  | -0.05157000144755 |
| O    | -2.31995999914161 | 0.52586999750968  | 1.10271000079907  |
| N    | -1.78639000054010 | -1.25866000198307 | -0.78175000303995 |
| C    | -3.71250999991800 | 0.41012999764607  | 1.10769999634979  |
| C    | -5.87562999773339 | 1.24212000236394  | 0.41041999999166  |
| C    | -5.10352000044425 | 4.18926999948551  | 1.41392000259727  |
| H    | -3.17110999972489 | 7.21579000005100  | -0.08760000039043 |
| C    | -4.69395000192446 | 6.57773999989903  | 1.28929999761685  |
| O    | 2.29107999995368  | -2.93934999851239 | 2.20417999995765  |
| O    | 1.62491998456461  | -0.76016000937960 | 3.26643001043390  |
| H    | 8.05581999781759  | 3.74571000157987  | 1.30456000248256  |
| H    | 4.96773999765656  | 4.22799000162243  | -1.58013000209719 |
| C    | 4.38191999958691  | 6.28016000146636  | -1.43759999993054 |
| C    | 2.58685000026422  | 6.81094999903334  | 0.08738000022291  |
| C    | 1.46585999938108  | 5.01005000128826  | 1.34493000043572  |
| H    | -3.58359004398266 | -5.03001998427652 | 3.31527005597662  |
| S    | -2.23490999686799 | -1.70811999824783 | -2.25539999926971 |
| C    | -4.27802999929056 | -0.71730000208014 | 1.76718000030140  |
| C    | -6.47621000231993 | 0.11399000007612  | 1.06204000006556  |
| 102  |                   |                   |                   |
| 3b_5 | (TS1-1')          |                   |                   |
| C    | -5.66539998403837 | -1.57104000107526 | 2.56929001574639  |
| C    | -5.78231993878081 | -2.92722999326225 | 2.85674005119866  |

|   |                   |                   |                   |
|---|-------------------|-------------------|-------------------|
| H | -8.19273000026991 | 2.51891999869551  | 0.81793000282040  |
| H | -6.20283001468927 | -0.84316999855710 | 3.18028999203320  |
| C | -5.98048000078547 | 1.03598999846221  | 1.14253999179143  |
| H | -3.22308000071564 | 5.93598000108699  | 4.20981000239055  |
| H | -6.41835002945628 | -3.22961000325919 | 3.69091997484448  |
| C | -4.28968006714962 | -3.44938000443398 | 1.06069994512769  |
| C | 4.08322002401749  | -1.92355986208637 | -3.26974995132675 |
| H | -3.97601999825399 | 4.99293000135961  | -0.14453000156711 |
| H | -6.14995999735176 | 6.10532000013109  | -0.42639999713222 |
| C | -5.09409999756750 | -3.90112999880126 | 2.11275000282321  |
| H | -3.73734997037565 | -4.15380999617539 | 0.43924002682939  |
| C | -4.15702001359838 | -2.09055000186422 | 0.77818998850285  |
| H | -5.19009449754324 | -4.95313717178858 | 2.34190539010608  |
| H | -3.51877204999413 | -0.14658964344874 | -2.73658319877957 |
| H | 3.82546000248152  | 7.42685000095319  | 2.25086000260307  |
| C | 3.48302999294826  | -0.76144999805885 | -2.75979999806834 |
| C | 3.47795003206833  | -2.66680010369846 | -4.28400036919297 |
| H | 5.03823998893384  | -2.25957003951464 | -2.86221998560231 |
| C | -4.84004999530796 | -1.12204000002348 | 1.52262999650114  |
| H | 4.00019029836059  | -2.26207819407834 | 1.36258857522450  |
| H | -3.51263998917773 | -1.79052000029922 | -0.04494998994160 |
| C | -7.31501000141840 | 4.38749000219384  | 0.21215000005787  |
| C | 4.19490999518146  | 0.04850999456861  | -1.74699001195855 |
| C | 2.23232009853242  | -0.39329004138150 | -3.28749989707887 |
| C | 2.24662011313312  | -2.28414985653473 | -4.83324981278260 |
| H | 3.98698995625719  | -3.55979998481869 | -4.64606987136631 |
| H | 0.47428919296285  | 3.35562548645349  | -1.44417233068518 |
| C | -6.11285000125623 | 5.07650000027230  | -0.06595000208989 |
| H | -6.91792000160632 | 0.50730999809716  | 1.32330000160877  |
| C | 3.52787999629325  | 0.71427001392480  | -0.68197000890926 |
| C | 5.57281000382404  | 0.18945998318790  | -1.79557999038424 |
| C | 1.63721969997422  | -1.13704022065762 | -4.29921007601719 |
| H | 1.72657997678336  | 0.50055007637771  | -2.93366001398431 |
| H | 1.77352556054365  | -2.85662399156179 | -5.61800790103799 |
| C | -0.19587997908274 | 3.64597991560914  | -0.64962009973306 |
| O | 2.13007000429626  | 0.62617999808191  | -0.63817999544073 |
| C | 4.16705999988054  | 1.45026999744131  | 0.30793000301928  |
| H | 6.12395000102676  | -0.25828999522823 | -2.62352000279127 |
| C | 6.29849000179940  | 0.87567999909674  | -0.79580000025072 |
| H | 0.66402014037842  | -0.80757993693178 | -4.66437002283287 |
| H | -3.75587999725162 | 4.02841999653392  | 2.74363000017556  |
| H | 1.14972000463250  | 3.94343000234960  | 4.03790998964682  |
| O | -1.45410002606133 | -0.12194999092962 | -3.63944998772978 |
| C | -1.31615006789702 | 2.82643009654359  | -0.32581992830473 |
| C | -0.00143994332635 | 4.76507997606975  | 0.14459015953260  |
| P | 1.50030000115223  | -0.35086000374819 | 0.48106999841914  |
| C | 5.60015000036737  | 1.48906000080369  | 0.29724999889227  |
| C | 3.36525000455234  | 2.16518001029024  | 1.33682999947437  |
| C | 7.71678999856592  | 0.93779000072392  | -0.83341000205973 |
| H | -1.21062000015963 | 7.34926000340129  | 3.76813000113085  |
| C | -4.89193000378214 | 4.45440000163649  | 0.09311000210243  |
| C | -2.57434001894172 | 5.70547002133142  | 3.36354998393184  |
| C | 3.72570000173772  | 6.35731000045657  | 2.06018999841074  |
| H | 5.14048999780103  | 6.36127999951999  | 0.41116000131804  |
| H | 2.25710999918725  | 6.04812000243679  | 3.60121000081442  |
| C | -7.27250000065169 | 3.07392000055424  | 0.62583000145158  |
| O | -2.70739999694666 | -2.23646000015972 | -3.14521999948149 |
| H | -8.27339000040287 | 4.89252999913403  | 0.08353999983844  |

|   |                   |                   |                   |
|---|-------------------|-------------------|-------------------|
| O | -1.47088993721488 | 1.62715994956649  | -1.03258000335352 |
| C | -2.28753005401581 | 3.16927004246697  | 0.60167986203428  |
| H | 0.83561996830972  | 5.43147002109387  | -0.07041005281866 |
| C | -0.86288000376101 | 5.08933000926188  | 1.21802997761174  |
| O | 2.23271001670509  | 0.11341000764293  | 1.83954999776106  |
| N | -0.03199999704501 | -0.10731999483853 | 0.49276999916874  |
| N | 2.03608998309177  | -1.87564000927293 | 0.24308000471253  |
| C | 6.36228999742395  | 2.07526000232510  | 1.34020999873769  |
| C | 3.51360999710505  | 3.57588000137293  | 1.55943999732470  |
| C | 2.39355997584307  | 1.49062998106761  | 2.06565000882050  |
| H | 8.23546000164024  | 0.47306999917810  | -1.67405999933135 |
| C | 8.42629999882953  | 1.54030999992843  | 0.18273999763869  |
| P | -1.38528002258591 | 0.21390000736094  | -0.24380001802925 |
| C | -3.56438996347766 | 2.41321996685549  | 0.69319007384449  |
| C | -2.03848997443753 | 4.30094997329613  | 1.44731003470176  |
| C | -0.59654002670157 | 6.19775002519962  | 2.06472996384797  |
| S | 2.78232001044334  | -2.84891999485885 | 1.35202999578502  |
| H | 1.32232000266512  | -2.60768999695027 | -0.64105000225842 |
| C | 7.74077000225544  | 2.09929999867079  | 1.28491999771089  |
| H | 5.84664999957139  | 2.49751000128251  | 2.20116000180669  |
| C | 4.37658999922178  | 4.39742999767443  | 0.78573000330103  |
| C | 2.71270001187447  | 4.20203999860725  | 2.57137999601493  |
| C | 1.54784001730705  | 2.09509001525200  | 3.03545998641555  |
| H | 9.51623000137439  | 1.57034000079540  | 0.14768000279226  |
| O | -2.37639999176418 | 0.36349000484112  | 1.03169001447250  |
| N | -1.89255000465648 | -0.91141000088586 | -1.24305999515601 |
| C | -3.59185000476295 | 1.04368000244953  | 0.92565000365652  |
| C | -4.81134999982736 | 3.10789000503379  | 0.53387999145813  |
| C | -2.87588999197878 | 4.63825999384083  | 2.54261001385679  |
| H | 0.29611000481019  | 6.79473999703549  | 1.86909000397490  |
| C | -1.43085998041029 | 6.50046997539439  | 3.11890002473341  |
| O | 2.85941999784419  | -4.15071000100181 | 0.70470999784585  |
| O | 2.20164000003314  | -2.71712000029961 | 2.67825000147126  |
| H | 8.30517999844906  | 2.54144000211878  | 2.10681000204914  |
| H | 4.95914000062074  | 3.94859999869354  | -0.01711999889235 |
| C | 4.47647999743057  | 5.75228000226047  | 1.02625999843032  |
| C | 2.86108999341511  | 5.59410000362264  | 2.81325000066755  |
| C | 1.75867998130216  | 3.44213998693581  | 3.28378002191476  |
| H | 0.80207086459602  | 1.50584483769203  | 3.54636312145454  |
| S | -2.36599999473393 | -0.85883999873194 | -2.76904000000971 |
| C | -4.79429999939220 | 0.32097000154130  | 1.19003999406281  |
| C | -6.03216999970047 | 2.40101999744962  | 0.78378999601219  |

102

3b\_5 (TS1-2')

|   |                   |                   |                   |
|---|-------------------|-------------------|-------------------|
| H | -5.88637229401531 | 1.67074488638763  | 3.86131467272458  |
| H | -6.21966000171070 | 3.50848000278409  | -4.07859999998796 |
| H | -1.69207000015405 | 2.05302000161682  | -5.57091000144963 |
| C | -5.22395999791386 | 3.20724999763508  | -4.41041000081289 |
| C | -4.17642002314395 | 0.75687998841451  | 1.04052999876470  |
| C | -4.67610000044060 | 2.59114999227056  | -2.08377999937028 |
| H | -6.04998003320304 | 3.79020999187400  | 2.52479999066198  |
| H | -5.58127000016636 | 3.66349999939871  | -6.47598000063525 |
| C | 1.60213001907348  | -4.26886013048203 | -0.07599993751862 |
| H | 0.30695000657286  | 5.93097000173792  | -4.24617999039668 |
| C | -4.30455999995089 | 1.91858000155315  | 0.26873999918272  |
| H | -5.06286001067212 | 3.94466999464739  | 0.28761999259522  |
| C | -4.74099004958745 | 0.66816998368431  | 2.31310995128649  |
| H | -4.61831997404280 | -0.26824999459925 | 2.85700001665273  |

|   |                   |                   |                   |
|---|-------------------|-------------------|-------------------|
| H | -3.64413998405734 | -0.10629999406148 | 0.64592000268377  |
| H | -3.71706580767362 | -2.16419807263155 | -1.72215560583864 |
| H | -3.31559999981894 | 2.91124000078166  | -7.20879000139483 |
| C | 2.70251999274219  | -4.14101997097730 | 0.78669998040642  |
| C | 0.53256004641327  | -5.10448998742989 | 0.24001996298687  |
| H | 1.57603998409575  | -3.72213987511281 | -1.01547009380758 |
| C | -4.86932000085134 | 3.28845999853955  | -5.73939999835625 |
| H | 7.32713999682791  | 2.03224000061168  | -4.99271000257559 |
| C | -4.97855998313888 | 3.01027001224508  | 0.84631001407174  |
| C | -3.58403000257004 | 2.87012999976540  | -6.15233999864446 |
| C | 3.85530000294774  | -3.25813000415555 | 0.50523999775944  |
| C | 2.67924997093710  | -4.87874998864801 | 1.98253001855726  |
| C | 0.51043998165815  | -5.85471000226428 | 1.42543000861230  |
| H | -0.30363002312393 | -5.14351999178359 | -0.45731999574010 |
| H | 1.48046798692489  | -1.16162403110537 | -3.48029817452967 |
| H | -5.67264000128468 | 2.91600999951612  | -1.78023999827187 |
| H | 2.92284462616987  | 0.31855055195509  | 3.40232018334851  |
| C | 3.69309000254387  | -1.95344999995881 | -0.03118999749466 |
| C | 5.14636999810478  | -3.62619000331017 | 0.84129999857718  |
| C | 1.61192000130221  | -5.71942995067124 | 2.28695000515835  |
| H | 3.48955000773085  | -4.75381000882787 | 2.70228999075186  |
| H | -0.32562546409579 | -6.49368194367327 | 1.67028160891133  |
| C | 1.14042008750593  | -0.14311016053903 | -3.58691959104874 |
| O | 2.39432999841473  | -1.56215000474372 | -0.39035999805477 |
| C | 4.71214999418186  | -1.02993999881524 | -0.19508999902423 |
| H | 5.32995000150376  | -4.63145999950690 | 1.22499000222159  |
| C | 6.23094999747606  | -2.72164999840655 | 0.76692999870499  |
| H | 1.63990000878808  | -6.26807002575636 | 3.22903999708827  |
| O | -2.04021999892773 | -3.66405999906941 | -1.60098000466864 |
| C | 6.73899000264535  | 1.68050000184436  | -4.14394999664071 |
| H | 2.54995999480658  | 5.31728999724877  | -5.15903001178077 |
| C | -0.12971005384356 | 0.24904014128051  | -3.07199027511932 |
| C | 1.89622987236218  | 0.86083007530356  | -4.17628042537312 |
| P | 1.65707998849666  | -0.56989997825854 | 0.63555000429933  |
| C | 6.01843999900970  | -1.38760999956121 | 0.28180999800876  |
| C | 4.44576000545408  | 0.29102000124805  | -0.82132000049318 |
| C | 7.52503000016649  | -3.09441000199523 | 1.21731000004946  |
| O | -3.70741999571798 | -3.31200000262322 | 0.24529999915821  |
| H | 5.72657000083877  | 3.55631999738926  | -3.85420999894786 |
| C | -5.53091993438257 | 2.91963001567597  | 2.11956000408131  |
| H | 7.55444999809070  | -0.33170000096892 | -4.21452000266597 |
| H | 3.97710000111786  | 3.93244000101311  | -2.19814999979798 |
| C | -5.44405000614702 | 1.73914000056733  | 2.87736001898755  |
| C | -2.67154000369859 | 2.39074999530443  | -5.23568999989664 |
| C | 0.61768999999438  | 4.88527000012341  | -4.26192000404876 |
| H | -1.21028000536537 | 4.19184999569706  | -3.38629000795999 |
| O | -0.88409000702690 | -0.70437006852605 | -2.36140997135359 |
| C | -0.67990000460640 | 1.51095994314088  | -3.23581992330289 |
| H | 2.86617002704557  | 0.61102999217558  | -4.60903989903807 |
| C | 1.46304000408115  | 2.20430997784607  | -4.23727998237969 |
| O | 2.62033000244897  | 0.72451999307526  | 0.69832999649786  |
| N | 0.25154000200693  | -0.27336001101755 | 0.05356999330416  |
| N | 1.56953000779289  | -1.07841001831247 | 2.172409999396028 |
| C | 7.09578999799898  | -0.46666000110998 | 0.34442999921890  |
| C | 5.23803999507482  | 0.74008999511386  | -1.93346000420007 |
| C | 3.43599000777301  | 1.13158000774068  | -0.36493998905502 |
| H | 7.67661999781770  | -4.11592000052481 | 1.57216000048814  |
| C | 8.55843999815663  | -2.18339999964436 | 1.23905000176361  |

|   |                   |                   |                   |
|---|-------------------|-------------------|-------------------|
| P | -1.07004997952258 | -0.46158000488960 | -0.77125998548259 |
| C | -2.09488998624549 | 1.78543002018228  | -2.87338998423404 |
| C | 0.15453005271475  | 2.54927001460387  | -3.76621990248691 |
| C | 2.30303004491358  | 3.22459000530573  | -4.75722989882044 |
| S | 2.63693999739329  | -1.00261999504521 | 3.43172000205479  |
| H | 0.41643999776411  | -1.73468999821777 | 2.51310000254123  |
| C | 8.33318999908131  | -0.85390999850166 | 0.81673000215715  |
| H | 6.93529000040934  | 0.56361000184808  | 0.03036999834264  |
| C | 6.14673000290146  | -0.11036999716942 | -2.61729999775505 |
| C | 5.07403000061901  | 2.08031999850700  | -2.41292000163590 |
| C | 3.25253999039148  | 2.46694999818088  | -0.82617001288014 |
| H | 9.54398999740194  | -2.47934999990675 | 1.60123000144798  |
| O | -1.69606999468432 | 1.03549000403478  | -0.63841999740546 |
| N | -2.07138003164078 | -1.53578997581422 | -0.18675001577775 |
| C | -2.56671999725055 | 1.57135000657506  | -1.58576000037938 |
| C | -3.00096000031078 | 2.30276000159421  | -3.85850000485503 |
| C | -0.23469001834143 | 3.91317999807664  | -3.78199004014970 |
| H | 3.29185999689141  | 2.94396000069014  | -5.12549000890192 |
| C | 1.89158998745073  | 4.53924999368534  | -4.76922002879445 |
| O | 3.86045999898599  | -1.73785000033199 | 3.16024000160137  |
| O | 1.83602999793288  | -1.33214999998978 | 4.60200000122719  |
| H | 9.14123000142327  | -0.12309000004257 | 0.87167000062921  |
| H | 6.25754999988748  | -1.14209000001293 | -2.28635000234245 |
| C | 6.87300000150661  | 0.34579000033638  | -3.69802000064034 |
| C | 5.85463999615135  | 2.52716999710358  | -3.51195000393450 |
| C | 4.10729000564244  | 2.91918000518117  | -1.81502998823742 |
| H | 2.46728488014687  | 3.07711564037095  | -0.40612471218038 |
| S | -2.88109998415075 | -2.75306001488558 | -0.83217998862635 |
| C | -3.84554999789365 | 2.01296000042652  | -1.13628000095253 |
| C | -4.31055000392909 | 2.71096999617396  | -3.44319000244954 |
